# Supplementary material for: Sonogashira diversification of unprotected halotryptophans, halotryptophan containing tripeptides; and generation of a new to nature bromo-natural product and its diversification in water
Source: PubMed Central journal article supplement (PMC5398305; doi:10.1039/c6sc04423a), 2016-11-11

# Sonogashira diversification of unprotected halotryptophans, halotryptophan containing tripeptides; and generation of a new to nature bromo-natural product and its diversification in water

M. J. Corr,<sup>a</sup> S. V. Sharma,<sup>a</sup> C. Pubill-Ulldemolins,<sup>a</sup> R. T. Bown,<sup>a</sup> P. Poirot,<sup>b</sup> D. R. Smith,<sup>a</sup> C. Cartmell,<sup>a</sup> A. Abou Fayad,<sup>c</sup> R. J. M. Goss<sup>a\*</sup>

## Supporting Information

| <i>General Synthetic Experimental</i>                                                                                                                 | Page number |
|-------------------------------------------------------------------------------------------------------------------------------------------------------|-------------|
| Experimental For the synthesis of:<br>Sodium 2'-(Dicyclohexylphosphanyl)-2,6-diisopropyl-(1,1-biphenyl)-4-sulfonate (sXPhos) <b>12</b> <sup>2</sup>   | 4           |
| Standard Reaction Procedure of 5-bromoindole <b>15</b> under reflux:                                                                                  | 5           |
| Microwave Reaction Procedure of 5-bromoindole <b>15</b> :                                                                                             | 5           |
| Standard Microwave Reaction Procedure for Tryptophans:                                                                                                | 5           |
| ( <i>S</i> )-2-Amino-3-(5-(phenylethynyl)-1 <i>H</i> -indol-3-yl)propanoic acid <b>19</b>                                                             | 6           |
| ( <i>S</i> )-2-Amino-3-5-((3-fluorophenyl)ethynyl)-1 <i>H</i> -indol-3-yl)propanoic acid <b>36</b>                                                    | 7           |
| ( <i>S</i> )-2-Amino-3-5-((4-cyanophenyl)ethynyl)-1 <i>H</i> -indol-3-yl)propanoic acid <b>39</b>                                                     | 7           |
| ( <i>S</i> )-2-Amino-3-(5-(thiophen-3-ylethynyl)-1 <i>H</i> -indol-3-yl)propanoic acid <b>42</b>                                                      | 8           |
| ( <i>S</i> )-2-Amino-3-(5-(4-hydroxybut-1-yn-1-yl)-1 <i>H</i> -indol-3-yl)propanoic acid <b>45</b>                                                    | 9           |
| ( <i>S</i> )-2-Amino-3-(5-(4-phenylbut-1-yn-1-yl)-1 <i>H</i> -indol-3-yl)propanoic acid <b>48</b>                                                     | 9           |
| ( <i>S</i> )-2-Amino-3-(5-(octa-1,7-diyn-1-yl)-1 <i>H</i> -indol-3-yl)propanoic acid <b>51</b>                                                        | 10          |
| ( <i>S</i> )-2-Amino-3-(3-cyclohexylprop-1-yn-1-yl)-1 <i>H</i> -indol-3-yl)propanoic acid <b>54</b>                                                   | 10          |
| <i>N</i> -Boc-7-bromo- <i>S</i> -tryptophan <b>66</b>                                                                                                 | 11          |
| 7-Bromo- <i>L</i> -tryptophan methyl ester hydrochloride <b>67</b>                                                                                    | 12          |
| <i>N</i> -Boc-Ala-Phe-OMe <b>68</b>                                                                                                                   | 12          |
| H-Ala-Phe-OMe.TFA <b>69</b>                                                                                                                           | 13          |
| <i>N</i> -Boc-Trp-(7-Br)-Ala-Phe-OMe <b>70</b>                                                                                                        | 14          |
| H-Trp-(7-Br)-Ala-Phe-OH <b>59</b>                                                                                                                     | 15          |
| <i>N</i> -Boc-Trp-(7-Br)-Phe-OMe <b>71</b>                                                                                                            | 16          |
| <i>N</i> -Boc-Ala-Trp-(7-Br)-Phe-OMe <b>72</b>                                                                                                        | 17          |
| H-Ala-Trp-(7-Br)-Phe-OH <b>58</b>                                                                                                                     | 18          |
| (( <i>S</i> )-2-(( <i>S</i> )-2-Aminopropanamido)-3-(7-((3-fluorophenyl)ethynyl)-1 <i>H</i> -indol-3-yl)propanoyl)- <i>L</i> -phenylalanine <b>60</b> | 19          |
| (( <i>S</i> )-2-Amino-3-(7-((3-fluorophenyl)ethynyl)-1 <i>H</i> -indol-3-yl)propanoyl)- <i>L</i> -alanyl- <i>L</i> -phenylalanine <b>61</b>           | 20          |
| Enantiopurity analysis                                                                                                                                | 21          |
| <i>General Biological Experimental</i>                                                                                                                | 21          |
| <i>Kitasatospora cystargenia</i> culturing, and precursor directed biosynthesis of new to nature bromo-cystargamide                                   | 22          |
| Upscaled feeding with selected 6-bromotryptophan at 0.25 mM to 8L culture                                                                             | 30          |
| LC-MSMS analysis of cystargamide and novel cystargamide species                                                                                       | 32          |
| Cross-coupling of bromo-cystargamide                                                                                                                  | 85          |
| LC-MSMS analysis of cross-coupled cystargamide                                                                                                        | 86          |
| <b>NMR spectra for small tryptophan, peptide derivatives and <sup>19</sup>F NMR analysis of cross-coupled cystargamide</b>                            |             |

## General Chemical Experimental

All reagents were purchased from commercial suppliers and were used without further purification unless otherwise stated. Dry dichloromethane was dried and deoxygenated with an MBraun SPS-800 solvent purification system and the moisture content of the solvent was analysed using a Karl Fischer coulometer (Metler Toledo DL32).

Proton NMR ( $^1\text{H}$ ), carbon NMR ( $^{13}\text{C}$ ), phosphorus NMR ( $^{31}\text{P}$ ) and fluorine NMR ( $^{19}\text{F}$ ) were recorded on a Bruker Ascend 500 (500 MHz), Bruker 500 UltraShield (500 MHz), Bruker Ascend 700 (700 MHz), Bruker 400 UltraShield (400 MHz) or a Bruker UltraShield (300 MHz) spectrometer. Fluorine NMR were also recorded as proton decoupled ( $^{19}\text{F}\{^1\text{H}\}$ ). Phosphorus NMR ( $^{31}\text{P}\{^1\text{H}\}$ ) was recorded as proton decoupled. Using an HSQC experiment with multiplicity editing, the  $^{13}\text{C}$  NMR signals were assigned to  $\text{CH}_3$ ,  $\text{CH}_2$ ,  $\text{CH}$  and  $\text{C}$ . The NMR experiments were carried out in deuteriochloroform ( $\text{CDCl}_3$ ) deuterated water ( $\text{D}_2\text{O}$ ), deuterated DMSO ( $d_6$ -DMSO) or deuterated methanol ( $d_4$ -MeOH). The chemical shifts ( $\delta$ ) are quoted in parts per million (ppm). Multiplicities are abbreviated as s, singlet; d, doublet; t, triplet; q, quartet; m, multiplet; b, broad for the  $^1\text{H}$  NMR,  $^{19}\text{F}$  NMR,  $^{19}\text{F}\{^1\text{H}\}$  NMR and  $^{13}\text{C}$  NMR spectra. Coupling constants are reported in Hertz (Hz).

Flash chromatography was performed using Davisil silica gel LC60A (40-63 micron). Thin layer chromatography (TLC) was performed using aluminium sheets of silica gel 60 F254 and was visualised under a Mineralight model UVGL-58 lamp (254 nm). The plates were developed with acidic methanolic vanillin solutions, ethanolic phosphomolybdic acid solutions or basic potassium permanganate solutions.

High and low resolution mass spectra were recorded at the University of St Andrews on a Waters Micromass LCT time of flight mass spectrometer coupled to a Waters 2975 HPLC system or on an Orbitrap ELOS pro. Optical rotation values were recorded in methanol on a Perkin Elmer Model 341 Polarimeter using a Na/Hal lamp (589 nm) at 20 °C in a 1 dm polarimeter cell and are given in  $10^{-1} \text{ deg cm}^2 \text{ g}^{-1}$ . Freeze drying was carried out on a Scanvac CoolSafe<sup>TM</sup> freeze dryer. Microwave reactions were carried out on a Biotage Initiator+.

5-Bromotryptophan **18**, 5-chlorotryptophan **20**, 6-bromotryptophan **21**, 7-bromotryptophan **22** and 7-iodotryptophan **23** were prepared as described previously.<sup>1</sup>

HPLC purification was carried out on an XBridge Prep Phenyl 5  $\mu\text{m}$  column (10x250 mm) on a Gilson HPLC system (Gilson 322 pump, Gilson UV/Vis-151 detector, Gilson 402 syringe

pump). UPLC analysis was carried out on a Waters Acquity H-Class UPLC system fitted with an Acquity UPLC BEH C18 column (1.7  $\mu\text{m}$ , 2.1x50 mm).

For purification of the cross coupling products from 5-bromotryptophan **18**, the following program was used: 10% acetonitrile/water for 5 min, 10% acetonitrile/water to 60% acetonitrile/water over 21 minutes, 60% acetonitrile/water to 90% acetonitrile/water over 5 minutes, 90% acetonitrile/water to 10% acetonitrile/water over 5 min, 10% acetonitrile/water for 4 min. Total run time 40 minutes. Flowrate 5 mL/min, detection wavelength 254 nm.

For purification of the cross coupling products from tripeptides **58** and **59**, the following program was used: 10% acetonitrile/water for 5 min, 10% acetonitrile/water to 60% acetonitrile/water over 30 minutes, 60% acetonitrile/water to 90% acetonitrile/water over 5 minutes, 90% acetonitrile/water to 10% acetonitrile/water over 5 min, 10% acetonitrile/water for 4 min. Total run time 50 minutes. Flowrate 5 mL/min, detection wavelength 330 nm.

Purification of selected peptides was carried out on a Biotage Isolera Four using reverse-phase SNAP C18 12 g column cartridges. The purification was carried out using water/methanol on the following gradient: 12 mL/min elution, 2% methanol/water for 1.15 min, 2 $\rightarrow$ 15% methanol/water for 1.15 min, 15% methanol/water for 5.15 min, 15 $\rightarrow$ 95% methanol/water for 15 min, 95% methanol/water for 3.45 min. The collection wavelength was set a 254 nm.

UPLC analysis was carried out on a Waters Acquity H-Class UPLC system.

A 1:1 mixture of water:acetonitrile was freshly prepared before each set of cross coupling reactions. The solvent was degassed by bubbling nitrogen through the solutions for at least 15 minutes, then storing under nitrogen.

The IUPAC names of some compounds were obtained using ChemBioDraw Ultra (version 13.0.2.3012).

**Sodium 2'-(Dicyclohexylphosphanyl)-2,6-diisopropyl-(1,1-biphenyl)-4-sulfonate (sXPhos) 12<sup>2</sup>**

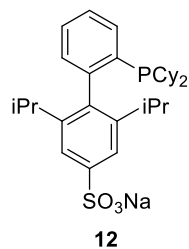

Sulfuric acid (1.0 mL) and fuming sulfuric acid (3.0 mL) were added to a suspension of XPhos (433 mg, 0.9 mmol, 1.0 eq) in dry DCM (3 mL) at 0 °C under nitrogen. The reaction was allowed to warm to r.t. and stirred for 24 h. The reaction mixture was cooled to 0 °C and crushed ice (10 g) was added. The reaction mixture was neutralised to pH 7 using sodium hydroxide solution (6 N, ~25 mL). The reaction mixture was extracted with DCM (3 x 50 mL) and the solvent was removed *in vacuo*. The residue was dissolved in cold methanol (20 mL), filtered, the filtrate collected and the solvent removed *in vacuo* to give sodium 2'-(dicyclohexylphosphanyl)-2,6-diisopropyl-(1,1-biphenyl)-4-sulfonate **12** (0.49 g, 100%) as a tan solid; <sup>1</sup>H NMR (500 MHz, *d*<sub>4</sub>-MeOH)  $\delta$  = 0.98 (6H, d,  $J$ (H,H)= 6.7 Hz, CH<sub>3</sub>), 1.08-1.31 (16H, m, CH<sub>3</sub>, CH<sub>2</sub>), 1.55-1.89 (12H, m, CH, CH<sub>2</sub>), 2.45-2.50 (2H, m, CH), 7.11-7.13 (1H, m, ArH), 7.38-7.47 (2H, m, ArH), 7.65-7.69 (3H, m, ArH); <sup>13</sup>C NMR (125 MHz, *d*<sub>4</sub>-MeOH)  $\delta$  = 23.1 (CH<sub>3</sub>), 25.9 (CH<sub>3</sub>), 27.5 (CH<sub>2</sub>), 28.3 (d,  $J$ (C,P)= 8.9 Hz, CH<sub>2</sub>), 28.5 (d,  $J$ (C,P)= 11.4 Hz, CH<sub>2</sub>), 30.6 (d,  $J$ (C,P)= 12.0 Hz, CH<sub>2</sub>), 31.9 (CH), 32.3 (d,  $J$ (C,P)= 16.1 Hz, CH<sub>2</sub>), 35.6 (d,  $J$ (C,P)= 15.4 Hz, CH), 121.2 (CH), 128.0 (CH), 129.1 (CH), 132.3 (d,  $J$ (C,P)= 6.1 Hz, CH), 133.8 (CH), 137.2 (d,  $J$ (C,P)= 17.6 Hz, C), 142.7 (C), 145.5 (C), 147.5 (C), 147.7 (C), 148.3 (C); <sup>31</sup>P{<sup>1</sup>H} NMR (162 MHz, *d*<sub>4</sub>-MeOH)  $\delta$  = -11.91 (1P, s); MS (ESI) 513 (100) [M-Na]<sup>-</sup>; HRMS: *m/z* calcd for C<sub>30</sub>H<sub>42</sub>O<sub>3</sub>P<sub>1</sub>S<sub>1</sub> [M-Na]<sup>-</sup>: 513.2598; found: 513.2596.

### **Standard Reaction Procedure of 5-bromoindole 15 under reflux:**

5-Bromoindole **15** (20 mg, 0.1 mmol, 1.0 eq), *bis*(acetonitrile)dichloropalladium (II) (variable, see Table 1 in main text), sXPhos **12** (variable, see Table 1 in main text) and cesium carbonate (81 mg, 0.26 mmol, 2.5 eq) were added to a flask fitted with a reflux condenser under nitrogen. Degassed water/acetonitrile (1:1, 2 mL) was added to the flask, followed by the liquid alkyne substrate (variable, see Table 1 in main text). The reaction mixture was heated at 100 °C for 18 h. The reaction mixture was then cooled to r.t.

For analysis of the reaction conversions, 0.2 mL of reaction mixture was removed from the well-stirred reaction mixture and the solvent was removed *in vacuo*. The residue was dissolved in *d*<sub>4</sub>-MeOH (0.7 mL) and analysed by <sup>1</sup>H NMR.

### **Microwave Reaction Procedure of 5-bromoindole 15:**

5-Bromoindole **15** (20 mg, 0.1 mmol, 1.0 eq), *bis*(acetonitrile)dichloropalladium (II) (1.3 mg, 10 μmol, 5 mol%), sXPhos **12** (8 mg, 30 μmol, 15 mol%) and cesium carbonate (81 mg, 0.26 mmol, 2.5 eq) were added to a microwave tube, which was then fitted with a suba seal. The flask was evacuated and flushed with nitrogen three times. Degassed water/acetonitrile (1:1, 2 mL) and acetonitrile (1.0 mL) were added to the microwave tube, followed by the liquid alkyne substrate (33 μL, 0.3 mmol, 3.0 eq). The tube was sealed and heated at 100 °C for 2 h using a microwave.

For analysis of the reaction conversion, 0.2 mL of reaction mixture was removed from the well-stirred microwave tube and the solvent was removed *in vacuo*. The residue was dissolved in *d*<sub>4</sub>-MeOH (0.7 mL) and analysed by <sup>1</sup>H NMR.

### **Standard Microwave Reaction Procedure for Tryptophans:**

The halo-tryptophan obtained from our previously reported procedure<sup>1</sup> (28 mg, 0.1 mmol, 1.0 eq for bromotryptophans, 33 mg 0.1 mmol, 1.0 eq for 7-iodotryptophan), *bis*(acetonitrile)dichloropalladium (II) (1.3 mg, 10 μmol, 5 mol%), sXPhos **12** (8 mg, 30 μmol, 15 mol%), (in the reaction with 4-cyanophenylacetylene **25**, 3.0 eq of the solid alkyne was also added at this stage) and cesium carbonate (81 mg, 0.26 mmol, 2.5 eq) were added to a microwave tube, which was then fitted with a suba seal. The flask was evacuated and flushed with nitrogen three times. Degassed water:acetonitrile (1:1, 2.0 mL) were added to the

microwave tube, followed by the liquid alkyne substrate (0.3 mmol, 3.0 eq). The tube was sealed and heated at 100 °C for 2 h using a microwave.

For analysis of the reaction conversions, 0.2 mL of reaction mixture was removed from the well-stirred microwave tube and the solvent was removed *in vacuo*. The residue was dissolved in *d*<sub>4</sub>-MeOH (0.7 mL) and analysed by <sup>1</sup>H NMR.

For purification of specified reactions, the reaction mixture was cooled to r.t. and diluted with water (6.0 mL). The reaction mixture was centrifuged (13,000 rpm, 16060 g, for 5 min). The ultrafiltrate was collected and purified by HPLC purification, as described above, in 1 mL injections. The appropriate HPLC fractions (generally eluted at 18-20 minutes) were collected and the solvent removed *in vacuo*. The residue was re-suspended in water (50-100 mL) and lyophilised to give the product.

### **(*S*)-2-Amino-3-(5-(phenylethynyl)-1*H*-indol-3-yl)propanoic acid **19****

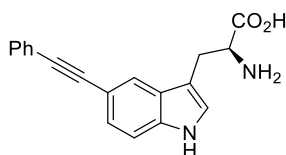

Using the standard procedure for tryptophans, 5-bromotryptophan **18** (28 mg, 0.1 mmol, 1.0 eq) and phenylacetylene **16** (33  $\mu$ L, 0.3 mmol, 3.0 eq) gave (*S*)-2-amino-3-(5-(phenylethynyl)-1*H*-indol-3-yl)propanoic acid **19** (29.4 mg, 97%) as a fluffy, white solid;  $[\alpha]_D -41.1^\circ$  (c 0.27, MeOH); <sup>1</sup>H NMR (500 MHz, *d*<sub>4</sub>-MeOH)  $\delta$  = 3.03 (1H, dd,  $J(\text{H,H})$  = 14.1, 8.4 Hz,  $\text{CH}_A\text{H}_B$ ), 3.37 (1H, d,  $J(\text{H,H})$  = 14.4 Hz,  $\text{CH}_A\text{H}_B$ ), 3.68 (1H, bs, CH), 7.22 (1H, s, ArH), 7.26 (1H, dd,  $J(\text{H,H})$  = 8.4, 1.5 Hz, ArH), 7.29-7.37 (4H, m, ArH), 7.48-7.51 (2H, m, ArH), 7.96 (1H, d,  $J(\text{H,H})$  = 0.7 Hz, ArH); <sup>13</sup>C NMR (125 MHz, *d*<sub>4</sub>-MeOH)  $\delta$  = 31.0 (CH<sub>2</sub>), 57.5 (CH), 87.4 (C), 92.5 (C), 111.9 (C), 112.5 (CH), 114.6 (C), 123.8 (CH), 125.6 (C), 125.96 (CH), 126.02 (CH), 128.7 (CH), 128.9 (C), 129.4 (CH), 132.2 (CH), 138.0 (C), 179.3 (CO); MS (ESI) 305 (100)  $[\text{M}+\text{H}]^+$ , 288 (80); HRMS:  $m/z$  calcd for C<sub>19</sub>H<sub>17</sub>N<sub>2</sub>O<sub>2</sub>  $[\text{M}+\text{H}]^+$ : 305.1285; found: 305.1273.

The reaction was repeated to give 22.0 mg (73%) and 21.4 mg (70%) of the expected product **19** to give an average yield of 80% over three reactions.

### **(*S*)-2-Amino-3-5-((3-fluorophenyl)ethynyl)-1*H*-indol-3-yl)propanoic acid **36****

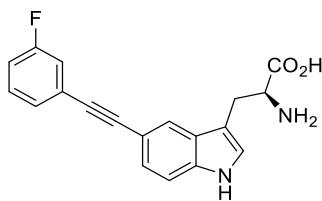

Using the standard procedure for tryptophans, 5-bromotryptophan **18** (28 mg, 0.1 mmol, 1.0 eq) and 3-fluorophenylacetylene **24** (34  $\mu$ L, 0.3 mmol, 3.0 eq) gave (*S*)-2-amino-3-5-((3-fluorophenyl)ethynyl)-1*H*-indol-3-yl)propanoic acid **36** (32.2 mg, 100%) as a white solid;  $[\alpha]_D^{25} -37.7^\circ$  (c 0.26, MeOH);  $^1\text{H NMR}$  (500 MHz,  $d_4$ -MeOH)  $\delta = 3.14$  (1H, dd,  $J(\text{H,H}) = 15.0, 8.9$  Hz,  $\text{CH}_\text{A}\text{H}_\text{B}$ ), 3.45-3.49 (1H, m,  $\text{CH}_\text{A}\text{H}_\text{B}$ ), 3.81 (1H, dd,  $J(\text{H,H}) = 8.9, 3.8$  Hz, CH), 7.07 (1H, ddd,  $J(\text{H,H}) = 9.0, 2.7$  Hz,  $J(\text{H,F}) = 0.6$  Hz, ArH), 7.22 (1H, ddd,  $J(\text{H,H}) = 2.7, 1.0$  Hz,  $J(\text{H,F}) = 9.6$  Hz, ArH), 7.25 (1H, s, ArH), 7.28-7.33 (2H, m, ArH), 7.35-7.40 (2H, m, ArH), 8.00 (1H, d,  $J(\text{H,H}) = 0.6$  Hz, ArH);  $^{13}\text{C NMR}$  (125 MHz,  $d_4$ -MeOH)  $\delta = 29.0$  ( $\text{CH}_2$ ), 56.9 (CH), 86.3 (C), 93.5 (C), 110.6 (C), 112.7 (CH), 114.3 (C), 115.8 (d,  $J(\text{C,F}) = 21.4$  Hz, CH), 118.6 (d,  $J(\text{C,F}) = 22.9$  Hz, CH), 123.8 (C), 126.2 (CH), 126.4 (CH), 127.6 (d,  $J(\text{C,F}) = 9.5$  Hz, C), 128.3 (d,  $J(\text{C,F}) = 2.7$  Hz, CH), 128.7 (C), 131.3 (d,  $J(\text{C,F}) = 8.8$  Hz, C), 138.2 (C) 164.0 (d,  $J(\text{C,F}) = 244.8$  Hz, CF), 175.7 (CO);  $^{19}\text{F}\{^1\text{H}\}$  NMR (470 MHz,  $d_4$ -MeOH)  $\delta = -115.34$  (1F, s);  $^{19}\text{F NMR}$  (376 MHz,  $d_4$ -MeOH)  $\delta = -115.31$  (1F, dddd,  $J(\text{H,F}) = 9.6, 8.5, 5.8, 0.6$  Hz); MS (ESI) 323 (60)  $[\text{M}+\text{H}]^+$ , 306 (50), 196 (80), 118 (100); HRMS:  $m/z$  calcd for  $\text{C}_{19}\text{H}_{16}\text{F}_1\text{N}_2\text{O}_2$   $[\text{M}+\text{H}]^+$ : 323.1190; found: 323.1190.

The reaction was repeated to give 32.2 mg (100%) and 28.9 mg (90%) of the expected product **36** to give an average yield of 97% over three reactions.

#### (*S*)-2-Amino-3-5-((4-cyanophenyl)ethynyl)-1*H*-indol-3-yl)propanoic acid **39**

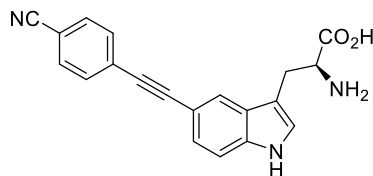

Using the standard procedure for tryptophans, 5-bromotryptophan **18** (28 mg, 0.1 mmol, 1.0 eq) and 4-cyanophenylacetylene **25** (38 mg, 0.3 mmol, 3.0 eq) gave (*S*)-2-amino-3-5-((3-cyanophenyl)ethynyl)-1*H*-indol-3-yl)propanoic acid **39** (26.1 mg, 79%) as a brown solid;  $[\alpha]_D^{25} -37.7^\circ$  (c 0.30, MeOH);  $^1\text{H NMR}$  (500 MHz,  $d_4$ -MeOH)  $\delta = 3.19$  (1H, dd,  $J(\text{H,H}) = 15.2, 8.7$  Hz,  $\text{CH}_\text{A}\text{H}_\text{B}$ ), 3.50 (1H, dd,  $J(\text{H,H}) = 15.2, 4.0$  Hz,  $\text{CH}_\text{A}\text{H}_\text{B}$ ), 3.81 (1H, dd,  $J(\text{H,H}) = 8.7, 4.0$  Hz, CH), 7.28 (1H, s, ArH), 7.32 (1H, dd,  $J(\text{H,H}) = 8.4, 1.3$  Hz, ArH), 7.40 (1H, d,  $J(\text{H,H}) = 8.4$  Hz,

ArH), 7.65-7.66 (2H, m, ArH), 7.72-7.74 (2H, m, ArH), 8.03 (1H, s, ArH);  $^{13}\text{C}$  NMR (125 MHz,  $d_4$ -MeOH)  $\delta$  = 28.4 (CH<sub>2</sub>), 56.7 (CH), 86.4 (C), 97.3 (C), 110.4 (C), 111.8 (C), 112.8 (CH), 113.8 (C), 119.5 (C), 124.2 (CH), 126.3 (CH), 126.7 (C), 128.6 (C), 130.6 (C), 132.9 (CH), 133.4 (CH), 138.5 (C), 174.6 (CO); MS (ESI) 330 (100) [M+H]<sup>+</sup>, 313 (90), 196 (90), 118 (100); HRMS:  $m/z$  calcd for C<sub>20</sub>H<sub>16</sub>N<sub>3</sub>O<sub>2</sub> [M+H]<sup>+</sup>: 330.1237; found: 330.1237.

The reaction was repeated to give 25.9 mg (79%) and 26.0 mg (79%) of the expected product **39** to give an average yield of 79% over three reactions.

### (*S*)-2-Amino-3-(5-(thiophen-3-ylethynyl)-1*H*-indol-3-yl)propanoic acid **42**

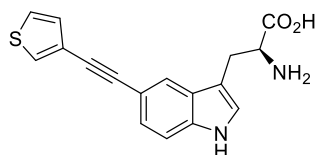

Using the standard procedure for tryptophans, 5-bromotryptophan **18** (28 mg, 0.1 mmol, 1.0 eq) and 3-ethynylthiophene **26** (30  $\mu\text{L}$ , 0.3 mmol, 3.0 eq) gave (*S*)-2-amino-3-(5-(thiophen-3-ylethynyl)-1*H*-indol-3-yl)propanoic acid **42** (28.1 mg, 91%) as a fluffy, white solid;  $[\alpha]_{\text{D}} -47.8^{\circ}$  (c 0.23, MeOH);  $^1\text{H}$  NMR (500 MHz,  $d_4$ -MeOH)  $\delta$  = 3.03 (1H, dd,  $J(\text{H,H})$  = 12.4, 7.9 Hz, CH<sub>A</sub>H<sub>B</sub>), 3.37 (1H, d,  $J(\text{H,H})$  = 14.3 Hz, CH<sub>A</sub>H<sub>B</sub>), 3.68 (1H, bs, CH), 7.18 (1H, dd,  $J(\text{H,H})$  = 5.0, 1.1 Hz, ArH), 7.21 (1H, s, ArH), 7.23 (1H, dd,  $J(\text{H,H})$  = 8.4, 1.3 Hz, ArH), 7.33 (1H, d,  $J(\text{H,H})$  = 8.4 Hz, ArH), 7.42 (1H, dd,  $J(\text{H,H})$  = 5.0, 3.0 Hz, ArH), 7.54 (1H, dd,  $J(\text{H,H})$  = 3.0, 1.1 Hz, ArH), 7.94 (1H, s, ArH);  $^{13}\text{C}$  NMR (125 MHz,  $d_4$ -MeOH)  $\delta$  = 30.9 (CH<sub>2</sub>), 57.5 (CH), 82.6 (C), 91.7 (C), 111.8 (C), 112.5 (CH), 114.6 (C), 123.6 (CH), 124.5 (C), 125.9 (CH), 126.0 (CH), 126.4 (CH), 128.54 (CH), 128.9 (C), 130.8 (CH), 137.9 (C), 179.5 (CO); MS (ESI) 311 (100) [M+H]<sup>+</sup>, 294 (90); HRMS:  $m/z$  calcd for C<sub>17</sub>H<sub>15</sub>N<sub>2</sub>O<sub>2</sub>S<sub>1</sub> [M+H]<sup>+</sup>: 311.0849; found: 311.0837.

The reaction was repeated to give 19.8 mg (64%) and 22.1 mg (71%) of the expected product **42** to give an average yield of 75% over three reactions.

### (*S*)-2-Amino-3-(5-(4-hydroxybut-1-yn-1-yl)-1*H*-indol-3-yl)propanoic acid **45**



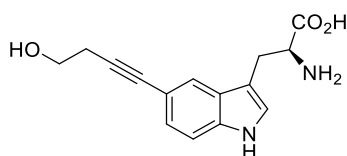

Using the standard procedure for tryptophans, 5-bromotryptophan **18** (28 mg, 0.1 mmol, 1.0 eq) and 3-butyn-1-ol **27** (23  $\mu$ L, 0.3 mmol, 3.0 eq) gave (*S*)-2-amino-3-(5-(4-hydroxybut-1-yn-1-yl)-1*H*-indol-3-yl)propanoic acid **45** (21.4 mg, 79%) as a fluffy, white solid;  $[\alpha]_D -30.0^\circ$  (c 0.23, MeOH);  $^1\text{H NMR}$  (500 MHz,  $d_4$ -MeOH)  $\delta$  = 2.61 (2H, t,  $J(\text{H,H})$ = 6.9 Hz,  $\text{CH}_2$ ), 2.93 (1H, dd,  $J(\text{H,H})$ = 14.3, 8.2 Hz,  $\text{CH}_A\text{H}_B$ ), 3.26 (1H, dd,  $J(\text{H,H})$ = 14.3, 4.3 Hz,  $\text{CH}_A\text{H}_B$ ), 3.53-3.56 (1H, m, CH), 3.73 (2H, t,  $J(\text{H,H})$ = 7.0 Hz,  $\text{CH}_2$ ), 7.12 (1H, dd,  $J(\text{H,H})$ = 8.4, 1.4 Hz, ArH), 7.16 (1H, s, ArH), 7.25 (1H, d,  $J(\text{H,H})$ = 8.4 Hz, ArH), 7.80 (1H, s, ArH);  $^{13}\text{C NMR}$  (125 MHz,  $d_4$ -MeOH)  $\delta$  = 24.4 ( $\text{CH}_2$ ), 32.1 ( $\text{CH}_2$ ), 57.9 (CH), 62.1 ( $\text{CH}_2$ ), 84.2 (C), 84.3 (C), 112.2 (CH), 112.5 (C), 115.1 (C), 123.6 (CH), 125.6 (CH), 126.0 (CH), 128.9 (C), 137.6 (C), 181.3 (CO); MS (ESI) 273 (100)  $[\text{M}+\text{H}]^+$ , 256 (30), 198 (50), 196 (100), 158 (70); HRMS:  $m/z$  calcd for  $\text{C}_{15}\text{H}_{17}\text{N}_2\text{O}_3$   $[\text{M}+\text{H}]^+$ : 273.1234; found: 273.1233.

The reaction was repeated to give 17.3 mg (64%) and 27.0 mg (99%) of the expected product **45** to give an average yield of 81% over three reactions.

#### (*S*)-2-Amino-3-(5-(4-phenylbut-1-yn-1-yl)-1*H*-indol-3-yl)propanoic acid **48**

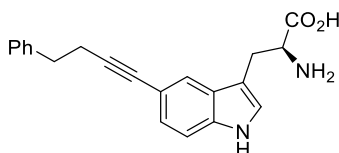

Using the standard procedure for tryptophans, 5-bromotryptophan **18** (28 mg, 0.1 mmol, 1.0 eq) and 4-phenyl-1-butyne **28** (42  $\mu$ L, 0.3 mmol, 3.0 eq) gave (*S*)-2-amino-3-(5-(4-phenylbut-1-yn-1-yl)-1*H*-indol-3-yl)propanoic acid **48** (8.9 mg, 27%) as a light brown solid;  $[\alpha]_D -24.8^\circ$  (c 0.27, MeOH);  $^1\text{H NMR}$  (500 MHz,  $d_4$ -MeOH)  $\delta$  = 2.67 (2H, t,  $J(\text{H,H})$ = 7.5 Hz,  $\text{CH}_2$ ), 2.90 (2H, t,  $J(\text{H,H})$ = 7.5 Hz,  $\text{CH}_2$ ), 3.00 (1H, dd,  $J(\text{H,H})$ = 14.3, 8.6 Hz,  $\text{CH}_A\text{H}_B$ ), 3.33-3.37 (1H, m,  $\text{CH}_A\text{H}_B$ ), 3.67 (1H, bs, CH), 7.08 (1H, dd,  $J(\text{H,H})$ = 8.3, 1.3 Hz, ArH), 7.17-7.21 (2H, m, ArH), 7.25-7.31 (5H, m, ArH), 7.75 (1H, s, ArH);  $^{13}\text{C NMR}$  (125 MHz,  $d_4$ -MeOH)  $\delta$  = 23.1 ( $\text{CH}_2$ ), 31.2 ( $\text{CH}_2$ ), 37.1 ( $\text{CH}_2$ ), 57.9 (CH), 84.4 (C), 87.4 (C), 112.0 (C), 112.7 (CH), 116.0 (CH), 123.7 (CH), 126.2 (CH), 126.6 (CH), 127.7 (CH), 129.2 (C), 129.8 (CH), 130.1 (CH), 138.1 (C) 142.9 (C), 179.5 (CO); MS (ESI) 333 (100)  $[\text{M}+\text{H}]^+$ , 316 (60); HRMS:  $m/z$  calcd for  $\text{C}_{21}\text{H}_{21}\text{N}_2\text{O}_2$   $[\text{M}+\text{H}]^+$ : 333.1598; found: 333.1591.

The reaction was repeated to give 8.3 mg (25%) and 8.7 mg (26%) of the expected product **48** to give an average yield of 26% over three reactions.

### (*S*)-2-Amino-3-(5-(octa-1,7-diyn-1-yl)-1*H*-indol-3-yl)propanoic acid **51**

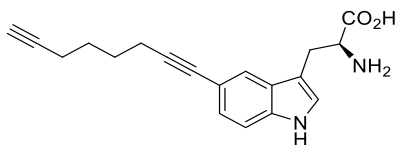

Using the standard procedure for tryptophans, 5-bromotryptophan **18** (28 mg, 0.1 mmol, 1.0 eq) and 1,7-octadiyne **29** (40  $\mu$ L, 0.3 mmol, 3.0 eq) gave (*S*)-2-amino-3-(5-(octa-1,7-diyn-1-yl)-1*H*-indol-3-yl)propanoic acid **51** (17.2 mg, 56%) as a tan solid;  $[\alpha]_D -23.1^\circ$  (c 0.29, MeOH);  $^1\text{H NMR}$  (500 MHz,  $d_4$ -MeOH)  $\delta$  = 1.68-1.75 (4H, m,  $\text{CH}_2$ ), 2.22-2.27 (3H, CH,  $\text{CH}_2$ ), 2.42-2.45 (2H, m,  $\text{CH}_2$ ), 2.98 (1H, dd,  $J(\text{H,H})$  = 14.6, 8.5 Hz,  $\text{CH}_\text{A}\text{H}_\text{B}$ ), 3.33-3.35 (1H, m,  $\text{CH}_\text{A}\text{H}_\text{B}$ ), 3.65 (1H, bs, CH), 7.11 (1H, dd,  $J(\text{H,H})$  = 8.4, 1.4 Hz, ArH), 7.17 (1H, s, ArH), 7.26 (1H, d,  $J(\text{H,H})$  = 8.4 Hz, ArH), 7.28 (1H, s, ArH);  $^{13}\text{C NMR}$  (125 MHz,  $d_4$ -MeOH)  $\delta$  = 18.6 ( $\text{CH}_2$ ), 19.6 ( $\text{CH}_2$ ), 28.9 ( $\text{CH}_2$ ), 29.2 ( $\text{CH}_2$ ), 31.0 ( $\text{CH}_2$ ), 57.5 (CH), 69.7 (CH), 83.5 (C), 84.8 (C), 86.9 (C), 111.6 (C), 112.2 (CH), 115.5 (CH), 123.2 (CH), 125.7 (CH), 126.1 (CH), 128.7 (C) 137.5 (C), 179.4 (CO); MS (ESI) 309 (100)  $[\text{M}+\text{H}]^+$ , 292 (70); HRMS:  $m/z$  calcd for  $\text{C}_{19}\text{H}_{21}\text{N}_2\text{O}_2$   $[\text{M}+\text{H}]^+$ : 309.1598; found: 309.1586.

The reaction was repeated to give 15.0 mg (49%) and 16.0 mg (52%) of the expected product **51** to give an average yield of 52% over three reactions.

### (*S*)-2-Amino-3-(3-cyclohexylprop-1-yn-1-yl)-1*H*-indol-3-yl)propanoic acid **54**

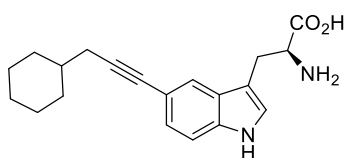

Using the standard procedure for tryptophans, 5-bromotryptophan **18** (28 mg, 0.1 mmol, 1.0 eq) and 3-cyclohexyl-1-propyne **30** (43  $\mu$ L, 0.3 mmol, 3.0 eq) at 100  $^\circ\text{C}$  for 8 h gave (*S*)-2-amino-3-(3-cyclohexylprop-1-yn-1-yl)propanoic acid **54** (8 mg, ~25%) as a fluffy, white solid that contained the sXPhos **12** ligand as an inseparable impurity;  $^1\text{H NMR}$  (500 MHz,  $d_4$ -MeOH)  $\delta$  = 1.10 (2H, dt,  $J(\text{H,H})$  = 12.5, 12.4, 3.1 Hz,  $\text{CH}_2$ ), 1.17-1.43 (2H, m,  $\text{CH}_2$ ), 1.50-1.58 (1H,

m, CH), 1.68-1.84 (2H, m, CH<sub>2</sub>), 1.90-1.95 (2H, m, CH<sub>2</sub>), 2.29 (2H, d,  $J(\text{H,H}) = 6.7$  Hz, CH<sub>2</sub>), 2.93 (1H, dd,  $J(\text{H,H}) = 14.2, 8.4$  Hz, CH<sub>A</sub>H<sub>B</sub>), 3.328-3.30 (1H, m, CH<sub>A</sub>H<sub>B</sub>), 3.59 (1H, s, CH), 7.09 (1H, dd,  $J(\text{H,H}) = 8.4, 1.4$  Hz, ArH), 7.16 (1H, s, ArH), 7.25 (1H, d,  $J(\text{H,H}) = 8.4$  Hz, ArH), 7.76 (1H, s, ArH); <sup>13</sup>C NMR (125 MHz, *d*<sub>4</sub>-MeOH)  $\delta = 27.0$  (CH<sub>2</sub>), 27.4 (CH<sub>2</sub>), 27.5 (CH<sub>2</sub>), 31.7 (CH<sub>2</sub>), 33.9 (CH<sub>2</sub>), 39.2 (CH), 57.8 (CH), 84.2 (C), 86.1 (C), 112.1 (CH), 115.6 (C), 123.2 (CH), 125.6 (CH), 126.0 (CH), 128.8 (C), 137.4 (C), 147.9 (C), 180.7 (CO); MS (ESI) 325 (100) [M+H]<sup>+</sup>, 308 (60); HRMS:  $m/z$  calcd for C<sub>20</sub>H<sub>25</sub>N<sub>2</sub>O<sub>2</sub> [M+H]<sup>+</sup>: 325.1911; found: 325.1890.

### ***N*-Boc-7-bromo-*S*-tryptophan 66**

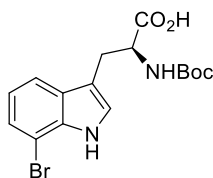

A suspension of 7-bromo-*S*-tryptophan **22** (100 mg, 0.35 mmol, 1.0 eq) and di-*t*-butyl dicarbonate (92 mg, 0.42 mmol, 1.2 eq) in 1,4-dioxane-water (1:1, 2 mL) was cooled to 0 °C. Aqueous KOH (1 M, 0.45 mL, 0.45 mmol, 1.25 eq) was added dropwise. The mixture was stirred for 4 h while warming to room temperature. The reaction was diluted with water (10 mL) and extracted with diethyl ether (2 x 10 mL). The aqueous layer was cooled in an ice-bath and the pH was adjusted to 2 using 1 M HCl. The resultant white suspension was extracted using ethyl acetate (3 x 10 mL). The combined organic layers were dried over anhydrous Na<sub>2</sub>SO<sub>4</sub> and the solvent was removed *in vacuo* to give *N*-Boc-7-bromo-*S*-tryptophan **66** (120 mg, 89%) as a white, waxy solid that was used without further purification; <sup>1</sup>H NMR (300 MHz, *d*<sub>4</sub>-MeOH)  $\delta = 1.37$  (9H, s, CH<sub>3</sub>), 3.11 (1H, dd,  $J(\text{H,H}) = 14.6, 7.8$  Hz, CH<sub>A</sub>H<sub>B</sub>), 3.31 (1H, dd,  $J(\text{H,H}) = 14.9, 5.1$  Hz, CH<sub>A</sub>H<sub>B</sub>), 4.43 (1H, dd,  $J(\text{H,H}) = 7.8, 5.1$  Hz, CH), 6.94 (1H, d,  $J(\text{H,H}) = 7.7$  Hz, ArH), 7.17 (1H, s, ArH), 7.26 (1H, d,  $J(\text{H,H}) = 7.5$  Hz, ArH), 7.56 (1H, dd,  $J(\text{H,H}) = 7.9, 0.7$  Hz, ArH), 10.55 (1H, bs, NH); <sup>13</sup>C NMR (125 MHz, *d*<sub>4</sub>-MeOH)  $\delta = 27.3$  (CH<sub>3</sub>), 24.7 (CH<sub>2</sub>), 54.4 (CH), 79.2 (C), 104.1 (C), 111.18 (C), 111.23 (C), 117.5 (CH), 119.6 (CH), 123.5 (CH), 124.2 (CH), 124.3 (CH), 129.1 (C), 156.3 (CO), 174.3 (CO); MS (ESI) 407 (100) [M(<sup>81</sup>Br)+Na]<sup>+</sup>, 405 (100) [M(<sup>79</sup>Br)+Na]<sup>+</sup>; HRMS:  $m/z$  calcd for C<sub>16</sub>H<sub>19</sub>BrN<sub>2</sub>Na<sub>1</sub>O<sub>4</sub> [M(<sup>79</sup>Br)+Na]<sup>+</sup>: 405.0420; found: 405.0415.

### **7-Bromo-*S*-tryptophan methyl ester hydrochloride 67**

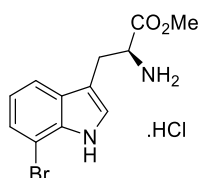

Thionyl chloride (290  $\mu$ L, 4 mmol, 4.0 eq) was added to a flask containing dry methanol (10 mL) at 0  $^{\circ}$ C under argon. After stirring for 10 min, 7-bromo-*S*-tryptophan **22** (285 mg, 1 mmol, 1.0 eq) was added. The reaction was stirred overnight while allowing it to warm to r.t. The solvent was removed *in vacuo* to give 7-bromo-*S*-tryptophan methyl ester hydrochloride **67** (330 mg, 100%) as an off white hydrochloride salt that was used without further purification.

NMR on the HCl salt ( $d_6$ -DMSO) revealed broad signals. Hence, an analytical sample was obtained by desalting with dilute NaHCO<sub>3</sub> solution and extraction with ethyl acetate. Drying (MgSO<sub>4</sub>) and evaporation of the solvent afforded the free base suitable for NMR in CDCl<sub>3</sub>; <sup>1</sup>H NMR (400 MHz, CDCl<sub>3</sub>)  $\delta$  = 3.08 (1H, dd,  $J$ (H,H)= 14.4, 7.4 Hz, CH<sub>A</sub>H<sub>B</sub>), 3.27 (1H, ddd,  $J$ (H,H)= 14.4, 5.0, 0.7 Hz, CH<sub>A</sub>H<sub>B</sub>), 3.73 (3H, s, CH<sub>3</sub>), 3.85 (1H, dd,  $J$ (H,H)= 7.4, 5.0 Hz, CH), 7.03 (1H, d,  $J$ (H,H)= 7.8 Hz, ArH), 7.15 (1H, d,  $J$ (H,H)= 2.2 Hz, ArH), 7.37 (1H, dd,  $J$ (H,H)= 7.7, 0.7 Hz, ArH), 7.58 (1H, d,  $J$ (H,H)= 7.9 Hz, ArH), 8.37 (1H, bs, NH); <sup>13</sup>C NMR (100 MHz, CDCl<sub>3</sub>)  $\delta$  = 30.9 (CH<sub>2</sub>), 52.2 (CH<sub>3</sub>), 55.1 (CH), 105.0 (C), 112.7 (C), 118.2 (CH), 120.9 (CH), 123.6 (CH), 124.7 (CH), 128.9 (C), 135.1 (C), 175.8 (CO); MS (ESI) 299 (100) [M(<sup>81</sup>Br)+H]<sup>+</sup>, 297 (100) [M(<sup>79</sup>Br)+H]<sup>+</sup>, 282 (60); HRMS:  $m/z$  calcd for C<sub>12</sub>H<sub>14</sub>BrN<sub>2</sub>O<sub>2</sub> [M(<sup>79</sup>Br)+H]<sup>+</sup>: 297.0233; found: 297.0228.

### ***N*-Boc-Ala-Phe-OMe 68**

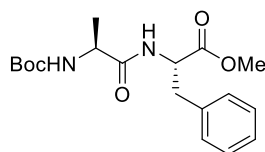

EDC.HCl (536 mg, 2.8 mmol, 1.2 eq) and HOBT (375mg, 2.8 mmol, 1.2 eq) were added to a microwave tube containing Boc-Ala-OH (440 mg, 2.3 mmol, 1.0 eq) in DMF (4.6 mL). The mixture was stirred for 5 min, then DIPEA (1 mL, 5.8 mmol, 2.5 eq) was added and the reaction mixture was stirred for 10 min. H-Phe-OMe.HCl (500 mg, 2.3 mmol, 1.0 eq) was added in one portion and reaction vial was sealed. The reaction was heated in a microwave reactor at 60  $^{\circ}$ C for 20 min. After cooling r.t., the reaction mixture was diluted with ethyl acetate (25 mL) and washed with water (3 x 10 mL), dilute sodium bicarbonate solution (10 mL) and brine (10 mL), dried over anhydrous MgSO<sub>4</sub> and the solvent removed *in vacuo* to give *N*-Boc-Ala-Phe-OMe

**68** (750 mg, 90%) as a white, waxy solid that was used without further purification;  $^1\text{H}$  NMR (300 MHz,  $\text{CDCl}_3$ )  $\delta$  = 1.28 (3H, d,  $J(\text{H,H})$  = 7.0 Hz,  $\text{CH}_3$ ), 1.42 (9H, s,  $\text{CH}_3$ ), 3.05 (1H, dd,  $J(\text{H,H})$  = 13.8, 6.3 Hz,  $\text{CH}_\text{A}\text{H}_\text{B}$ ), 3.13 (1H, dd,  $J(\text{H,H})$  = 13.8, 5.9 Hz,  $\text{CH}_\text{A}\text{H}_\text{B}$ ), 3.67 (3H, s,  $\text{CH}_3$ ), 4.18 (1H, bs, CH), 4.83 (1H, q,  $J(\text{H,H})$  = 6.2 Hz, CH), 5.27 (1H, bs, NH), 6.83 (1H, bs, NH), 7.03-7.15 (2H, m, ArH), 7.16-7.37 (3H, m, ArH);  $^{13}\text{C}$  NMR (75 MHz,  $\text{CDCl}_3$ )  $\delta$  = 18.4 ( $\text{CH}_3$ ), 28.8 ( $\text{CH}_3$ ), 37.9 ( $\text{CH}_2$ ), 50.0 (CH), 52.3 ( $\text{CH}_3$ ), 53.3 (CH), 79.9 (C), 127.0 (CH), 128.5 (CH), 129.3 (CH), 135.9 (C), 155.4 (CO), 171.8 (CO), 172.5 (CO).

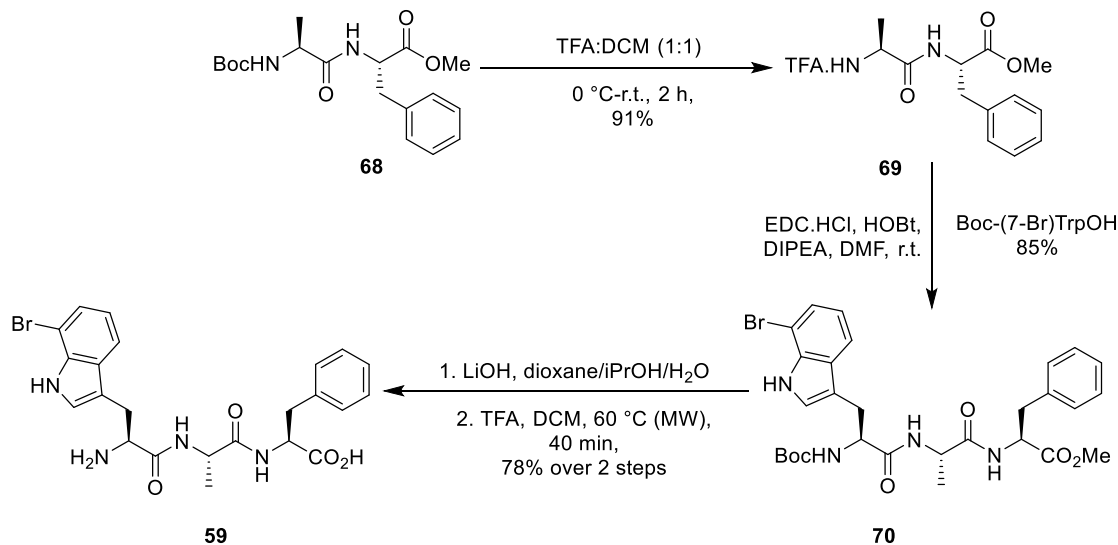

### H-Ala-Phe-OMe.TFA **69**

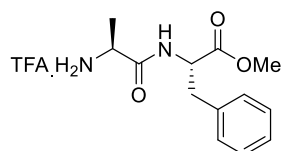

Water (0.2 mL) and TFA (2 mL) were added to a solution of  $N$ -Boc-Ala-Phe-OMe **68** (300 mg, 0.86 mmol, 1.0 eq) in DCM (3 mL) at 0 °C and stirred for 2 h, while warming to r.t. The solvent was removed *in vacuo*. The resulting pale, yellow oil was titrated with ice cold diethyl ether (3 x 5 mL) to give H-Ala-Phe-OMe.TFA **69** (310 mg, 91%) as an off white solid that was used without further purification;  $^1\text{H}$  NMR (400 MHz,  $d_4$ -MeOH)  $\delta$  = 1.50 (3H, d,  $J(\text{H,H})$  = 7.1 Hz,  $\text{CH}_3$ ), 3.02 (1H, dd,  $J(\text{H,H})$  = 14.0, 9.2 Hz,  $\text{CH}_\text{A}\text{H}_\text{B}$ ), 3.23 (1H, dd,  $J(\text{H,H})$  = 14.0, 5.4 Hz,  $\text{CH}_\text{A}\text{H}_\text{B}$ ), 3.73 (3H, s,  $\text{CH}_3$ ), 3.88 (1H, q,  $J(\text{H,H})$  = 7.1 Hz, CH), 4.73 (1H, dd,  $J(\text{H,H})$  = 9.2, 5.4 Hz, CH), 7.24 (3H, dt,  $J(\text{H,H})$  = 9.4, 3.2 Hz, ArH), 7.36-7.28 (2H, m, ArH).

### $N$ -Boc-Trp-(7-Br)-Ala-Phe-OMe **70**

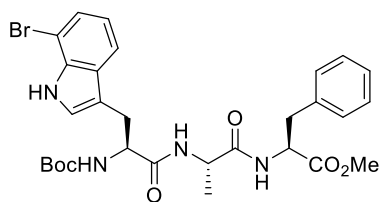

A solution of *N*-Boc-Trp-(7-Br)-OH **66** (220 mg, 0.57 mmol, 1.0 eq), H-Ala-Phe-OMe.TFA **69** (210 mg, 0.57 mmol, 1.0 eq) in DMF (4 mL) was cooled to 0 °C. Solid EDC.HCl (132 mg, 0.7 mmol, 1.2 eq) and HOBT (95 mg, 0.7 mmol, 1.2 eq) were added. The reaction mixture was stirred for 5 min, then DIPEA (0.28 mL, 1.6 mmol, 2.8 eq) was added dropwise. The reaction mixture was stirred for 20 h, while warming to r.t. The reaction mixture was diluted with ethyl acetate (20 mL) and washed successively with water (3 x 10 mL) and brine (10 mL). The combined organic layers were dried over anhydrous MgSO<sub>4</sub> and the solvent was removed *in vacuo*. Purification by column chromatography using silica gel (ethyl acetate:hexanes, 10-90%) gave *N*-Boc-Trp-(7-Br)-Ala-Phe-OMe **70** (300 mg, 85%) as a waxy, white solid; <sup>1</sup>H NMR (300 MHz, *d*<sub>4</sub>-MeOH) δ = 1.25 (3H, d, *J*(H,H) = 6.9 Hz, CH<sub>3</sub>), 1.35 (9H, s, CH<sub>3</sub>), 2.91-3.27 (4H, m, CH<sub>2</sub>), 3.66 (3H, s, CH<sub>3</sub>), 4.26-4.44 (2H, m, CH, CH), 4.61 (1H, d, *J*(H,H) = 6.0 Hz, CH), 6.92 (1H, t, *J*(H,H) = 7.7 Hz, ArH), 7.13-7.21 (4H, m, ArH), 7.22-7.28 (3H, m, ArH), 7.59 (1H, d, *J*(H,H) = 7.8 Hz, ArH); <sup>13</sup>C NMR (75 MHz, *d*<sub>4</sub>-MeOH) δ = 18.4 (CH<sub>3</sub>), 28.4 (CH<sub>3</sub>), 28.5 (CH<sub>2</sub>), 37.9 (CH<sub>2</sub>), 49.0 (CH), 52.5 (CH<sub>3</sub>), 53.6 (CH), 55.0 (CH), 80.2 (C), 104.9 (C), 111.8 (C), 118.2 (CH), 128.8 (CH), 124.0 (CH), 124.6 (CH), 127.2 (CH), 128.7 (CH), 128.8 (CH), 129.3 (CH), 134.9 (C), 136.0 (C), 155.6 (CO), 171.6 (CO), 171.8 (CO), 171.9 (CO); MS (ESI) 639 (100) [M(<sup>81</sup>Br)+Na]<sup>+</sup>, 637 (100) [M(<sup>79</sup>Br)+Na]<sup>+</sup>, 617 (15) [M(<sup>81</sup>Br)+H]<sup>+</sup>, 615 (15) [M(<sup>79</sup>Br)+H]<sup>+</sup>; HRMS: *m/z* calcd for C<sub>29</sub>H<sub>36</sub>BrN<sub>4</sub>O<sub>6</sub> [M(<sup>79</sup>Br)+H]<sup>+</sup>: 615.1813; found: 615.1799.

### H-Trp-(7-Br)-Ala-Phe-OH **59**

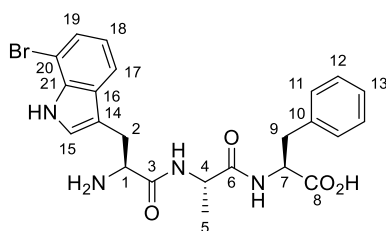

A solution of lithium hydroxide (14 mg, 0.6 mmol, 1.5 eq) in water (1 mL) was added to a solution of *N*-Boc-Trp-(7-Br)-Ala-Phe-OMe **70** (250 mg, 0.4 mmol, 10 eq) in 1,4-dioxane-*i*PrOH-water (1:1:0.5, 4 mL) at 0 °C. The reaction mixture was stirred vigorously until all the starting material has been consumed (as determined by TLC analysis). The reaction mixture was diluted with water (2 mL) and quenched by the addition of Amberlyst-120-H<sup>+</sup> (to pH ~5-6). The resin was filtered and the solvent removed *in vacuo* to give the crude free acid (*N*-Boc-Ala-Phe-Trp-(7-Br)-OH). This intermediate was dissolved in DCM (3 mL) and transferred to a microwave vial. TFA (65 μL, 2 mmol, 5.0 eq) was added and reaction vial was sealed with an aluminium crimp cap. Reaction mixture was heated in a microwave reactor at 60 °C for 40 min. After cooling, the solvent was removed *in vacuo*. The residue was purified using gradient reversed phase chromatography (C-18, 12 g, water-MeOH, 5-95% gradient) to give H-Trp-(7-Br)-Ala-Phe-OH.TFA **59** (190 mg, 78% over 2 steps) as a white solid; <sup>1</sup>H NMR (500 MHz, *d*<sub>4</sub>-MeOH) δ = 1.37 (3H, d, *J*(H,H) = 7.1 Hz, CH<sub>3</sub>-C5), 3.00-3.03 (1H, dd, *J*(H,H) = 14.0, 8.1 Hz, CH<sub>A</sub>H<sub>B</sub>-C9), 3.12 (1H, dd, *J*(H,H) = 15.2, 9.0 Hz, CH<sub>A</sub>H<sub>B</sub>-C2), 3.21 (1H, dd, *J*(H,H) = 14.0, 5.2 Hz, CH<sub>A</sub>H<sub>B</sub>-C9), 3.36 (1H, dd, *J*(H,H) = 15.2, 5.2 Hz, CH<sub>A</sub>H<sub>B</sub>-C2), 4.11 (1H, dd, *J*(H,H) = 9.0, 5.2 Hz, CH-C1), 4.41 (1H, q, *J*(H,H) = 7.1 Hz, CH-C4), 4.63 (1H, dd, *J*(H,H) = 8.1, 5.2 Hz, CH-C7), 6.94 (1H, dd, *J*(H,H) = 7.8, 7.7 Hz, ArH-C18), 7.17 (1H, ddd, *J*(H,H) = 4.6, 4.1, 4.1 Hz, ArH-C15), 7.26-7.27 (5H, m, ArH-C11,C12,13), 7.30 (1H, d, *J*(H,H) = 7.5 Hz, ArH-C19), 7.66 (1H, d, *J*(H,H) = 7.9 Hz, ArH-C17); <sup>13</sup>C NMR (125 MHz, *d*<sub>4</sub>-MeOH) δ = 18.3 (CH<sub>3</sub>, C5), 28.9 (CH<sub>2</sub>, C2), 38.3 (CH<sub>2</sub>, C9), 50.5 (CH, C4), 54.6 (CH, C1), 55.3 (CH, C7), 105.8 (C, C20), 109.4 (C, C14), 118.6 (C, C17), 121.5 (CH, C18), 125.5 (CH, C19), 126.9 (CH, C13), 127.8 (CH, C15), 129.5 (CH, C10), 129.9 (C, C16), 130.5 (C, C11), 136.8 (C, C21), 138.4 (C, C10), 169.6 (CO, C3), 174.1 (CO, C6), 174.6 (CO, C8); HRMS: *m/z* calcd for C<sub>23</sub>H<sub>26</sub>BrN<sub>4</sub>O<sub>4</sub> [M(<sup>79</sup>Br)+H]<sup>+</sup>: 501.1132; found: 501.1132.

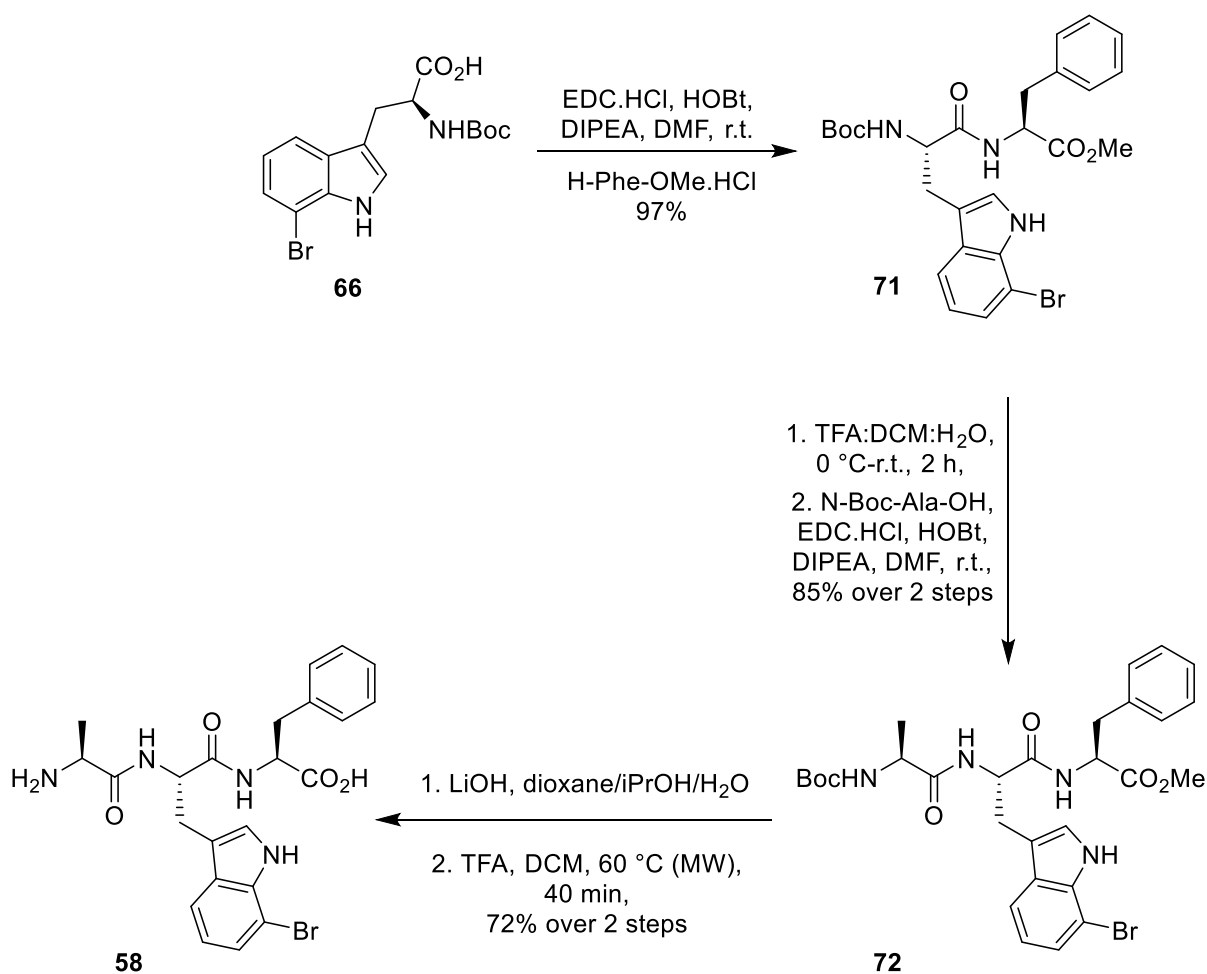

### *N*-Boc-Trp-(7-Br)-Phe-OMe 71

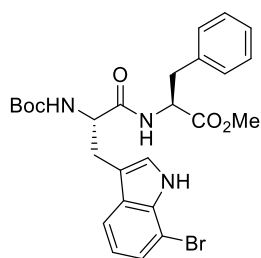

A solution of *N*-Boc-Trp-(7-Br)-OH **66** (135 mg, 0.37 mmol, 1.0 eq), H-Phe-OMe.HCl (85 mg, 0.4 mmol, 1.1 eq) in DMF (2 mL) was cooled to 0 °C. Solid EDC.HCl (83 mg, 0.43 mmol, 1.2 eq) and HOBT (58 mg, 0.43 mmol, 1.2 eq) were added. The reaction mixture was stirred for 5 min, then DIPEA (0.19 mL, 1.1 mmol, 3.0 eq) was added dropwise. The reaction mixture was stirred for 16 h, while warming to r.t. The reaction mixture was diluted with ethyl acetate (20 mL) and washed successively with water (3 x 10 mL) and brine (10 mL). The combined organic layers were dried over anhydrous MgSO<sub>4</sub> and the solvent was removed *in vacuo*. Purification by column chromatography using silica gel (MeOH:DCM, 0-10%) gave *N*-Boc-Trp-(7-Br)-



Phe-OMe **71** (194 mg, 97%) as a waxy, white solid;  $^1\text{H}$  NMR (300 MHz,  $d_4$ -MeOH)  $\delta$  = 1.36 (9H, s, CH<sub>3</sub>), 2.86-3.06 (3H, m, CH,  $\text{CH}_\text{A}\text{H}_\text{B}$ ), 3.15 (1H, dd,  $J(\text{H,H})$  = 14.6, 5.9 Hz,  $\text{CH}_\text{A}\text{H}_\text{B}$ ), 3.60 (3H, s, CH<sub>3</sub>), 4.35 (1H, t,  $J(\text{H,H})$  = 6.7 Hz, CH), 4.62 (1H, t,  $J(\text{H,H})$  = 6.7 Hz, CH), 6.93 (1H, t,  $J(\text{H,H})$  = 7.7 Hz, ArH), 7.06-7.17 (3H, m, ArH), 7.18-7.28 (4H, m, ArH), 7.57 (1H, d,  $J(\text{H,H})$  = 7.8 Hz, ArH);  $^{13}\text{C}$  NMR (75 MHz,  $d_4$ -MeOH)  $\delta$  = 27.3 (CH<sub>3</sub>), 27.9 (CH<sub>2</sub>), 37.1 (CH<sub>2</sub>), 51.3 (CH<sub>3</sub>), 53.7 (CH), 55.2 (CH), 79.3 (C), 104.1 (C), 111.0 (C), 117.5 (CH), 119.6 (CH), 123.5 (C), 124.4 (CH), 126.5 (CH), 128.1 (CH), 128.9 (CH), 129.1 (CH), 134.9 (C), 136.4 (C), 156.0 (CO), 171.6 (CO), 172.8 (CO); MS (ESI) 568 (100) [ $\text{M}(\text{}^{81}\text{Br})+\text{Na}$ ]<sup>+</sup>, 566 (100) [ $\text{M}(\text{}^{79}\text{Br})+\text{Na}$ ]<sup>+</sup>, 546 (14), 544 (14); HRMS:  $m/z$  calcd for C<sub>29</sub>H<sub>36</sub>BrN<sub>4</sub>O<sub>6</sub> [ $\text{M}(\text{}^{79}\text{Br})+\text{H}$ ]<sup>+</sup>: 544.1442; found: 544.1431.

### ***N*-Boc-Ala-Trp-(7-Br)-Phe-OMe **72****

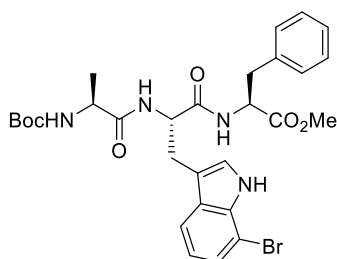

Water (0.1 mL) and TFA (1 mL) were added to a solution of *N*-Boc-Trp-(7-Br)-Phe-OMe **71** (190 mg, 0.34 mmol, 1.0 eq) in DCM (2 mL) at 0 °C. The reaction mixture was stirred for 2 h, while warming to r.t. The solvent was removed *in vacuo*. The resultant pale yellow oil was triturated with cold diethyl ether (3 x 5 mL) to afford H-Trp-(7-Br)-Phe-OMe.TFA as a white foam.

A solution of H-Trp-(7-Br)-Phe-OMe.TFA (190 mg, 0.34 mmol, 1.0 eq) and *N*-Boc-Ala-OH (70 mg, 0.37 mmol, 1.1 eq) in DCM:DMF (1:1, 4 mL) was cooled to 0 °C. EDC.HCl (78 mg, 0.4 mmol, 1.2 eq) and HOBT (54 mg, 0.4 mmol, 1.2 eq) were added to the reaction mixture. DIPEA (0.2 mL, 1.2 mmol, 3.5 eq) was added dropwise and the reaction mixture was warmed to r.t. and stirred for 16 h. The reaction mixture was diluted with ethyl acetate (20 mL) and washed successively with water (3 x 10 mL) and brine (10 mL). The combined organic layers were dried over anhydrous MgSO<sub>4</sub> and the solvent was removed *in vacuo* to give *N*-Boc-Ala-Trp-(7-Br)-Phe-OMe **72** (190 mg, 85% over 2 steps) as a waxy, white solid that was used without further purification;  $^1\text{H}$  NMR (500 MHz,  $d_6$ -DMSO)  $\delta$  = 1.07 (3H, d,  $J(\text{H,H})$  = 7.1 Hz, CH<sub>3</sub>), 1.35 (9H, s, CH<sub>3</sub>), 2.88-2.97 (2H, m,  $\text{CH}_\text{A}\text{H}_\text{B}$ ,  $\text{CH}_\text{A}\text{H}_\text{B}$ ), 3.00 (1H, dd,  $J(\text{H,H})$  = 13.7, 6.1 Hz,  $\text{CH}_\text{A}\text{H}_\text{B}$ ), 3.07 (1H, dd,  $J(\text{H,H})$  = 14.7, 5.6 Hz,  $\text{CH}_\text{A}\text{H}_\text{B}$ ), 3.56 (3H, s, CH<sub>3</sub>), 3.86-4.00 (1H,

m, CH), 4.46 (1H, t,  $J(\text{H,H})= 7.2$  Hz, CH), 4.52-4.62 (1H, m, CH), 6.89 (1H, d,  $J(\text{H,H})= 7.6$  Hz, ArH), 6.93 (1H, t,  $J(\text{H,H})= 7.7$  Hz, ArH), 7.13-7.22 (4H, m, ArH), 7.23-7.31 (3H, m, ArH), 7.58 (1H, d,  $J(\text{H,H})= 7.8$  Hz, ArH);  $^{13}\text{C}$  NMR (125 MHz,  $d_6$ -DMSO)  $\delta = 18.3$  (CH<sub>3</sub>), 28.1 (CH<sub>2</sub>), 28.5 (CH<sub>3</sub>), 37.0 (CH<sub>2</sub>), 50.0 (CH), 52.2 (CH<sub>3</sub>), 53.0 (CH), 54.0 (CH), 78.7 (C), 104.3 (C), 111.3 (C), 118.4 (CH), 120.1 (CH), 123.8 (CH), 125.3 (CH), 127.0 (CH), 128.7 (C), 129.3 (CH), 129.5 (CH), 134.4 (C), 137.2 (C), 155.4 (CO), 171.5 (CO), 172.0 (CO), 172.8 (CO); MS (ESI) 639 (100)  $[\text{M}(\text{}^{81}\text{Br})+\text{Na}]^+$ , 637 (100)  $[\text{M}(\text{}^{79}\text{Br})+\text{Na}]^+$ , 617 (15)  $[\text{M}(\text{}^{81}\text{Br})+\text{H}]^+$ , 615 (15)  $[\text{M}(\text{}^{79}\text{Br})+\text{H}]^+$ ; HRMS:  $m/z$  calcd for C<sub>29</sub>H<sub>36</sub>Br<sub>1</sub>N<sub>4</sub>O<sub>6</sub>  $[\text{M}(\text{}^{79}\text{Br})+\text{H}]^+$ : 615.1813; found: 615.1800.

### H-Ala-Trp-(7-Br)-Phe-OH **58**

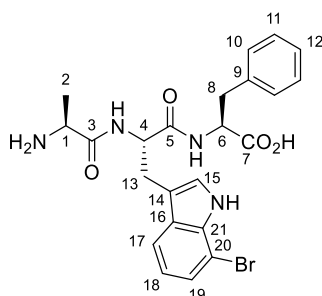

Following the procedure reported for **59**, *N*-Boc-Ala-Trp-(7-Br)-Phe-OMe **72** (170 mg, 0.27 mmol, 1.0 eq) gave H-Ala-Trp-(7-Br)-Phe-OH **58** (120 mg, 72% over 2 steps) as a white solid;  $^1\text{H}$  NMR (500 MHz,  $d_4$ -MeOH)  $\delta = 1.37$  (3H, d,  $J(\text{H,H})= 7.1$  Hz, CH<sub>3</sub>-C5), 3.00-3.03 (1H, dd,  $J(\text{H,H})= 14.0, 8.1$  Hz, CH<sub>A</sub>H<sub>B</sub>-C9), 3.12 (1H, dd,  $J(\text{H,H})= 15.2, 9.0$  Hz, CH<sub>A</sub>H<sub>B</sub>-C2), 3.21 (1H, dd,  $J(\text{H,H})= 14.0, 5.2$  Hz, CH<sub>A</sub>H<sub>B</sub>-C9), 3.36 (1H, dd,  $J(\text{H,H})= 15.2, 5.2$  Hz, CH<sub>A</sub>H<sub>B</sub>-C2), 4.11 (1H, dd,  $J(\text{H,H})= 9.0, 5.2$  Hz, CH-C1), 4.41 (1H, q,  $J(\text{H,H})= 7.1$  Hz, CH-C4), 4.63 (1H, dd,  $J(\text{H,H})= 8.1, 5.2$  Hz, CH-C7), 6.94 (1H, dd,  $J(\text{H,H})= 7.8, 7.7$  Hz, ArH-C18), 7.17 (1H, ddd,  $J(\text{H,H})= 4.6, 4.1, 4.1$  Hz, ArH-C15), 7.26-7.27 (5H, m, ArH-C11,C12,13), 7.30 (1H, d,  $J(\text{H,H})= 7.5$  Hz, ArH-C19), 7.66 (1H, d,  $J(\text{H,H})= 7.9$  Hz, ArH-C17);  $^{13}\text{C}$  NMR (125 MHz,  $d_4$ -MeOH)  $\delta = 18.3$  (CH<sub>3</sub>, C5), 28.9 (CH<sub>2</sub>, C2), 38.3 (CH<sub>2</sub>, C9), 50.5 (CH, C4), 54.6 (CH, C1), 55.3 (CH, C7), 105.8 (C, C20), 109.4 (C, C14), 118.6 (C, C17), 121.5 (CH, C18), 125.5 (CH, C19), 126.9 (CH, C13), 127.8 (CH, C15), 129.5 (CH, C10), 129.9 (C, C16), 130.5 (C, C11), 136.8 (C, C21), 138.4 (C, C10), 169.6 (CO, C3), 174.1 (CO, C6), 174.6 (CO, C8); HRMS:  $m/z$  calcd for C<sub>23</sub>H<sub>26</sub>Br<sub>1</sub>N<sub>4</sub>O<sub>4</sub>  $[\text{M}(\text{}^{79}\text{Br})+\text{H}]^+$ : 501.1132; found: 501.1128.

### ((*S*)-2-((*S*)-2-Aminopropanamido)-3-(7-((3-fluorophenyl)ethynyl)-1*H*-indol-3-yl)propanoyl)-L-phenylalanine **60**

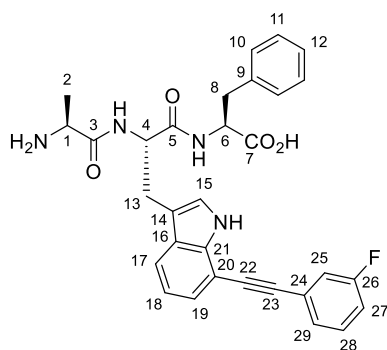

((*S*)-2-((*S*)-2-Aminopropanamido)-3-(7-bromo-1*H*-indol-3-yl)propanoyl)-L-phenylalanine **58** (4.0 mg, 8  $\mu$ mol, 1.0 eq), sXPhos **12** (0.6 mg, 1.2  $\mu$ mol, 15 mol%) and CsCO<sub>3</sub> (6.0 mg, 20  $\mu$ mol, 2.5 eq) were added to a microwave tube and flushed with nitrogen. The microwave tube was sealed. A stock solution of *bis*(acetonitrile)dichloropalladium (II) (0.8 mg, 4  $\mu$ mol, 0.5 eq) in degassed H<sub>2</sub>O:CH<sub>3</sub>CN (1:1, 1.0 mL) was prepared. The catalyst stock solution (0.1 mL, 0.4  $\mu$ mol, 5 mol%) was injected into the microwave tube, followed by degassed H<sub>2</sub>O:CH<sub>3</sub>CN (1:1, 0.1 mL). 3-Fluorophenylacetylene **24** (10  $\mu$ L, 80  $\mu$ mol, 10.0 eq) was then injected into the microwave tube. The reaction mixture was well stirred, then heated at 100 °C for 2 h in a microwave. The reaction mixture was cooled to r.t. and diluted to 3 mL with H<sub>2</sub>O:CH<sub>3</sub>CN (9:1). The reaction mixture was centrifuged (13,000 rpm, 16060 g, 5 min) and the ultrafiltrate was collected and purified by HPLC purification as described above and lyophilised to give ((*S*)-2-((*S*)-2-aminopropanamido)-3-(7-((3-fluorophenyl)ethynyl)-1*H*-indol-3-yl)propanoyl)-L-phenylalanine **60** (2.0 mg, 47%) as a white solid; <sup>1</sup>H NMR (500 MHz, *d*<sub>4</sub>-MeOH)  $\delta$  = 1.24 (3H, d, *J*(H,H) = 6.9 Hz, CH<sub>3</sub>-C2), 3.04 (1H, dd, *J*(H,H) = 13.5, 6.1 Hz, CH<sub>A</sub>H<sub>B</sub>-C8), 3.08 (1H, dd, *J*(H,H) = 14.6, 9.0 Hz, CH<sub>A</sub>H<sub>B</sub>-C13), 3.20 (1H, dd, *J*(H,H) = 13.5, 4.9 Hz, CH<sub>A</sub>H<sub>B</sub>-C8), 3.30-3.38 (1H, dd, *J*(H,H) = 14.6, 4.9 Hz, CH<sub>A</sub>H<sub>B</sub>-C13), 3.48 (1H, q, *J*(H,H) = 6.9 Hz, CH-C1), 4.45 (1H, dd, *J*(H,H) = 6.1, 4.9 Hz, CH-C6), 4.66 (1H, dd, *J*(H,H) = 9.0, 4.9 Hz, CH-C4), 7.06 (1H, dd, *J*(H,H) = 7.7, 7.6 Hz, ArH-C18), 7.10-7.21 (8H, m, ArH-C10,C11,C12,C15,C25), 7.30 (1H, dd, *J*(H,H) = 7.4, 0.7 Hz, ArH-C19), 7.38-7.44 (2H, m, ArH-C27,C28), 7.43-7.46 (1H, m, ArH-C29), 7.71 (1H, dd, *J*(H,H) = 8.0, 0.9 Hz, ArH-C17)- NOTE- the proton signal at 3.30-3.38 was obscured by the residual *d*<sub>4</sub>-MeOH solvent peak, the position of the signal was determined by the 2D NMR experiments, with the coupling constants determined from the coupling constants of the protons on C4 and C13; <sup>13</sup>C NMR (125 MHz, *d*<sub>4</sub>-MeOH)  $\delta$  = 19.9 (CH<sub>3</sub>, C2), 28.8 (CH<sub>2</sub>, C13), 39.0 (CH<sub>2</sub>, C8), 51.0 (CH, C1), 55.7 (CH, C4), 57.2 (CH, C6), 88.0 (C, C22), 92.4 (C, d, *J*(C,F) = 3.2 Hz, C23), 106.9 (C, C20), 112.1 (C, C14, C16), 116.3 (CH, d, *J*(C,F) = 21.8 Hz, C25), 119.0 (CH, d, *J*(C,F) = 23.1 Hz, C27), 121.0 (CH, C17), 125.5

(CH, C15), 126.3 (CH, C19), 127.0 (C, C24), 127.3 (CH, C12), 128.6 (CH, d,  $J(\text{C},\text{F})= 2.8$  Hz, C29), 129.1 (CH, C10), 129.3 (C, C16), 130.8 (CH, C11), 131.4 (CH, d,  $J(\text{C},\text{F})= 8.8$  Hz, C28), 138.2 (C, C21), 139.2 (C, C9), 164.0 (CF, d,  $J(\text{C},\text{F})= 244.4$  Hz, C26), 172.6 (CO, C5), 176.7 (CO, C3), 177.3 (CO, C7);  $^{19}\text{F}\{^1\text{H}\}$  NMR (376 MHz,  $d_4$ -MeOH)  $\delta = -115.2$  (1F, s);  $^{19}\text{F}$  NMR (470 MHz,  $d_4$ -MeOH)  $\delta = -115.2$  (1F, ddd,  $J(\text{H},\text{F})= 9.5, 9.1, 5.6$  Hz); MS (ESI) 541 (100)  $[\text{M}+\text{H}]^+$ ; HRMS:  $m/z$  calcd for  $\text{C}_{31}\text{H}_{30}\text{F}_1\text{N}_4\text{O}_4$   $[\text{M}+\text{H}]^+$ : 541.2246; found: 541.2221.

**((S)-2-Amino-3-(7-((3-fluorophenyl)ethynyl)-1H-indol-3-yl)propanoyl)-L-alanyl-L-phenylalanine 61**

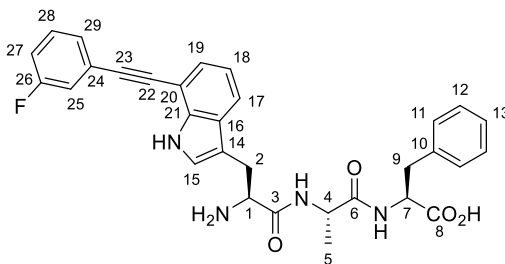

Using the same procedure as **60**, ((S)-2-Amino-3-(7-bromo-1H-indol-3-yl)propanoyl)-L-alanyl-L-phenylalanine **59** (4 mg, 8  $\mu\text{mol}$ , 1.0 eq) gave ((S)-2-amino-3-(7-((3-fluorophenyl)ethynyl)-1H-indol-3-yl)propanoyl)-L-alanyl-L-phenylalanine **61** (4.3 mg, 100%) as a white solid;  $^1\text{H}$  NMR (500 MHz,  $d_4$ -MeOH)  $\delta = 1.15$  (3H, d,  $J(\text{H},\text{H})= 7.1$  Hz,  $\text{CH}_3$ -C5), 3.00 (1H, dd,  $J(\text{H},\text{H})= 13.6, 6.8$  Hz,  $\text{CH}_\text{A}\text{H}_\text{B}$ -C9), 3.02 (1H, dd,  $J(\text{H},\text{H})= 14.7, 7.3$  Hz,  $\text{CH}_\text{A}\text{H}_\text{B}$ -C2), 3.17-3.22 (2H, m,  $\text{CH}_\text{A}\text{H}_\text{B}$ -C2,C9), 3.68 (1H, dd,  $J(\text{H},\text{H})= 7.3, 5.2$  Hz, CH-C1), 4.29 (1H, q,  $J(\text{H},\text{H})= 7.1$  Hz, CH-C4), 4.45 (1H, dd,  $J(\text{H},\text{H})= 6.8, 4.9$  Hz, CH-C7), 7.04 (1H, dd,  $J(\text{H},\text{H})= 7.7, 7.5$  Hz, ArH-C18), 7.09-7.13 (2H, m, ArH-C15,C25), 7.17-7.20 (5H, m, ArH-C11,C12,C13), 7.31 (1H, d,  $J(\text{H},\text{H})= 7.2$  Hz, ArH-C19), 7.38-7.41 (2H, m, ArH-C27,28), 7.43-7.46 (1H, m, ArH-C29), 7.69 (1H, d,  $J(\text{H},\text{H})= 7.9$  Hz, ArH-C17);  $^{13}\text{C}$  NMR (125 MHz,  $d_4$ -MeOH)  $\delta = 18.0$  ( $\text{CH}_3$ , C5), 31.4 ( $\text{CH}_2$ , C2), 39.1 ( $\text{CH}_2$ , C9), 50.6 (CH, C4), 56.5 (CH, C1), 57.2 (CH, C7), 88.0 (C, C22), 92.4 (C, d,  $J(\text{C},\text{F})= 3.0$  Hz, C23), 107.0 (C, C20), 111.8 (C, C14, C16), 116.3 (CH, d,  $J(\text{C},\text{F})= 21.5$  Hz, C25), 119.0 (CH, d,  $J(\text{C},\text{F})= 23.1$  Hz, C27), 119.9 (CH, C18), 121.1 (CH, C17), 125.9 (CH, C13), 126.3 (CH, C19), 127.0 (C, d,  $J(\text{C},\text{F})= 9.3$  Hz, C24), 127.3 (CH, C15), 128.6 (CH, d,  $J(\text{C},\text{F})= 2.9$  Hz, C29), 129.1 (CH, C11), 130.8 (CH, C12), 131.3 (CH, d,  $J(\text{C},\text{F})= 8.8$  Hz, C28), 138.3 (C, C21), 139.3 (C, C10), 163.9 (CF, d,  $J(\text{C},\text{F})= 244.8$  Hz, C26), 173.7 (CO, C6), 176.8 (CO, C3), 177.6 (CO, C8);  $^{19}\text{F}\{^1\text{H}\}$  NMR (470 MHz,  $d_4$ -MeOH)  $\delta = -115.2$  (1F, s);  $^{19}\text{F}$  NMR (470 MHz,  $d_4$ -MeOH)  $\delta = -115.2$  (1F, ddd,  $J(\text{H},\text{F})=$

9.4, 9.1, 5.8 Hz); MS (ESI) 541 (100) [M+H]<sup>+</sup>; HRMS: *m/z* calcd for C<sub>31</sub>H<sub>30</sub>F<sub>1</sub>N<sub>4</sub>O<sub>4</sub> [M+H]<sup>+</sup>: 541.2246; found: 541.2224.

### **Enantiopurity analysis**

The enantiopurity of the cross coupled products was analysed using Marfey's Reagent (1-fluoro-2,4-dinitrophenyl-5-L-alanine amide, FDAA).

The tryptophan was dissolved in HCl solution (1 M, 10 mg/mL). An Eppendorf tube containing the tryptophan (50 µL), FDAA (1% w/v in actone, 100 µL) and NaHCO<sub>3</sub> solution (1M, 70 µL) was mixed thoroughly and incubated at 37 °C for 1 h. The reaction mixture was diluted (10 µL in 490 µL water) and centrifuged (13,000 rpm, 16060 g, 5 min) before UPLC analysis.

The UPLC analysis was carried out in acetonitrile/0.1% TFA in water at a gradient of 20% acetonitrile to 90% acetonitrile over 4.7 minutes. A 3:1 mixture of L-tryptophan to D-tryptophan was used as a standard. Two blank runs using acetone were conducted between each tryptophan sample. In all of the tryptophans analysed, only a single peak for the L-enantiomer was observed.

### **General Biological Experimental**

Biological reagents and components for media, buffers and stock solutions were purchased from commercial suppliers, used without further purification and stored according to the supplier's instructions. Microorganisms were stored at -80 °C for long and short-term storage. Microorganisms were cultured under sterile conditions using a Faster BH-EN class II vertical laminar airflow cabinet and fermentation media was sterilised at 121 °C for 20 minutes at 1.3 bar in a Boxer Benchtop Denley autoclave prior to use. Alternatively, aqueous solutions of heat labile components were sterilised by passage through a 0.2 µm membrane. Culturing apparatus was sterilised by autoclaving as described above or alternatively, disposable pre-sterilised apparatus was used.

General apparatus: Pipetting of solutions and samples was done using LABNET Biopette autoclavable pipettes. Microbial cultures were incubated in a New Brunswick Scientific Innova 4300 incubator shaker, a New Brunswick Scientific I26 incubator shaker series, or Genlab incubator (static). pH measurements were taken using a Fisherbrand HydruS 300 pH meter. Centrifugation was carried out using a Thermo Scientific IEC CL30R centrifuge.

### ***Kitasatospora cystargenia* culturing, and precursor directed biosynthesis of new to nature bromo-cystargamide**

*Kitasatospora cystargenia* NRRL-B16505 was obtained from the USDA agriculture research service culture collection. The strain was fermented in GY medium (10 g/L glucose, 10 g/L yeast extract) for 48 h at 28 °C (as previously reported by Kerr and coworkers)<sup>3</sup> and 200 rpm, in an incubator with a 2.54 cm throw. The mycelium from this culture was stored in 20% glycerol at -80 °C.

### **Small scale feeding experiments**

In order to explore whether the halotryptophans could be incorporated too, we carried out small scale feeding experiments with 7, 6 and 5-chlorotryptophan and 7, 6 and 5-bromotryptophan at 0.25 and 1mM to both 4mL cultures in 24 deep well plates and 50mL cultures in 250mL Erlenmeyer flasks. The cultures were extracted and analysed by LCMSMS. Results demonstrated that all of the halotryptophans incorporated into cystargamide, generating new to nature halogenated analogues.

## 6Br-tryptophan 21 - Feeding at 0.25 mM scale

| Detected Cystargamide Species                                 | [M+H] <sup>+</sup> | Absorbance peak area <sup>[c]</sup> | Ratio compared to Cystargamide (WT) <sup>[d]</sup> |
|---------------------------------------------------------------|--------------------|-------------------------------------|----------------------------------------------------|
| Cystargamide (WT)                                             | 954.4244           | 5923338                             | 10.0                                               |
| Linear cystargamide <sup>[a]</sup>                            | 972.4349           | 3036620                             | 5.1                                                |
| Cystargamide no hydroxylated <sup>[b]</sup>                   | 938.4294           | 607443                              | 1.0                                                |
| (6BrW) Brominated cystargamide no hydroxylated <sup>[b]</sup> | 1016.340           | 122182                              | 0.2                                                |
| (6Brw) Brominated cystargamide                                | 1032.334           | 834562                              | 1.4                                                |

[a] The ester bond appeared to have been hydrolysed [b] That lacked the 5-hydroxy on the tryptophan [c] Average area from the reaction performed in triplicate [d] Calculated as: (Absorbance peak area species/Absorbance peak area cystargamide wild type (WT))\*10

### Ratios of the detected cystargamide species:

Cyclic cystargamide species : Linear cystargamide species = **3:1**

Brominated cystargamide species : Brominated linear cystargamide species = **1:0**

Cyclic cystargamide species : cyclic cystargamide species no hydroxylated= **9:1**

Brominated cyclic cystargamide species : Brominated cystargamide no hydroxylated= **7:1**

Analysis of the extract by LC-MS also revealed quantities of analogues of cystargamide containing alanine [ALA] instead of glycine. In this case, only linear forms in which the ester bond appeared to have been hydrolysed were detected.

| Detected Cystargamide[ALA] species                                            | [M+H] <sup>+</sup> | Absorbance peak area <sup>[c]</sup> | Ratio compared to Cystargamide (WT) <sup>[d]</sup> |
|-------------------------------------------------------------------------------|--------------------|-------------------------------------|----------------------------------------------------|
| Linear cystargamide[ALA] <sup>[a]</sup>                                       | 986.4500           | 9574644                             | 16.2                                               |
| (6BrW) Brominated linear cystargamide[ALA] no hydroxylated <sup>[a],[b]</sup> | 1048.3662          | 272892                              | 0.5                                                |
| (6BrW) Brominated linear cystargamide[ALA] <sup>[a]</sup>                     | 1064.3611          | 1312663                             | 2.2                                                |

[a] The ester bond appeared to have been hydrolysed [b] That lacked the 5-hydroxy on the tryptophan [c] Average area from the reaction performed in triplicate [d] Calculated as: (Absorbance peak area species/Absorbance peak area cystargamide wild type (WT))\*10

## 6Br-tryptophan 21 -Feeding at 1 mM scale

| Detected Cystargamide species                                 | [M+H] <sup>+</sup> | Absorbance peak area <sup>[c]</sup> | Ratio compared to Cystargamide (WT) <sup>[d]</sup> |
|---------------------------------------------------------------|--------------------|-------------------------------------|----------------------------------------------------|
| Cystargamide (WT)                                             | 954.4244           | 9135391                             | 10.0                                               |
| Linear cystargamide <sup>[a]</sup>                            | 972.4349           | 4175252                             | 4.6                                                |
| Cystargamide no hydroxylated <sup>[b]</sup>                   | 938.4294           | 54982                               | 0.1                                                |
| (6BrW) Brominated cystargamide no hydroxylated <sup>[b]</sup> | 1016.340           | 1035165                             | 1.1                                                |
| (6BrW) Brominated cystargamide                                | 1032.334           | 1928082                             | 2.1                                                |

[a] The ester bond appeared to have been hydrolysed [b] That lacked the 5-hydroxy on the tryptophan [c] Average area from the reaction performed in triplicate [d] Calculated as: (Absorbance peak area species/Absorbance peak area cystargamide wild type (WT))\*10

### Ratios of the detected cystargamide species:

Cyclic cystargamide species : Linear cystargamide species = **3:1**

Brominated cystargamide species : Brominated linear cystargamide species = **1:0**

Cyclic cystargamide species : cyclic cystargamide species no hydroxylated= **10.4:1**

Brominated cyclic cystargamide species : Brominated cystargamide no hydroxylated= **2:1**

Analysis of the extract by LC-MS also revealed quantities of analogues of cystargamide containing alanine [ALA] instead of glycine. In this case, only linear forms in which the ester bond appeared to have been hydrolysed were detected.

| Detected Cystargamide[ALA] species                                           | [M+H] <sup>+</sup> | Absorbance peak area <sup>[c]</sup> | Ratio compared to Cystargamide (WT) <sup>[d]</sup> |
|------------------------------------------------------------------------------|--------------------|-------------------------------------|----------------------------------------------------|
| Linear cystargamide[ALA] <sup>[a]</sup>                                      | 986.4500           | 15397915                            | 16.9                                               |
| Linear cystargamide[ALA] no hydroxylated <sup>[a],[b]</sup>                  | 970.4557           | 60678                               | 0.1                                                |
| (6Br) Brominated linear cystargamide[ALA] no hydroxylated <sup>[a],[b]</sup> | 1048.3662          | 1907165                             | 2.1                                                |
| (6Br) Brominated linear cystargamide[ALA] <sup>[a]</sup>                     | 1064.3611          | 2939735                             | 3.2                                                |

[a] The ester bond appeared to have been hydrolysed [b] That lacked the 5-hydroxy on the tryptophan [c] Average area from the reaction performed in triplicate [d] Calculated as: (Absorbance peak area species/Absorbance peak area cystargamide wild type (WT))\*10



## 5Br-tryptophan- Feeding at 1 mM scale

| Detected Cystargamide species                                 | [M+H] <sup>+</sup> | Absorbance peak area <sup>[c]</sup> | Ratio compared to Cystargamide (WT) <sup>[d]</sup> |
|---------------------------------------------------------------|--------------------|-------------------------------------|----------------------------------------------------|
| Cystargamide (WT)                                             | 954.4244           | 17929225                            | 10.0                                               |
| Linear cystargamide <sup>[a]</sup>                            | 972.4349           | 600331                              | 3.8                                                |
| Cystargamide no hydroxylated <sup>[b]</sup>                   | 938.4294           | 70645                               | 0.3                                                |
| (5BrW) Brominated cystargamide no hydroxylated <sup>[b]</sup> | 1016.3400          | 312674                              | 0.1                                                |

[a] The ester bond appeared to have been hydrolysed [b] That lacked the 5-hydroxy on the tryptophan [c] Average area from the reaction performed in triplicate [d] Calculated as: (Absorbance peak area species/Absorbance peak area cystargamide wild type (WT))\*10

### Ratios of the detected cystargamide species:

Cyclic cystargamide species : Linear cystargamide species = **3:1**

Brominated cystargamide species : Brominated linear cystargamide species = **1:0**

Cyclic cystargamide species : cyclic cystargamide species no hydroxylated= **21:1**

Brominated cyclic cystargamide species : Brominated cystargamide no hydroxylated= **0:1**

Analysis of the extract by LC-MS also revealed quantities of analogues of cystargamide containing alanine [ALA] instead of glycine. In this case, only linear forms in which the ester bond appeared to have been hydrolysed were detected.

| Detected Cystargamide[ALA] species                                                | [M+H] <sup>+</sup> | Absorbance peak area <sup>[c]</sup> | Ratio compared to Cystargamide (WT) <sup>[d]</sup> |
|-----------------------------------------------------------------------------------|--------------------|-------------------------------------|----------------------------------------------------|
| Linear cystargamide[ALA] <sup>[a]</sup>                                           | 986.4500           | 9536071                             | 10.8                                               |
| (5BrW) Brominated linear cystargamide[ALA] no hydroxylated <sup>[a],[b],[e]</sup> | 1048.3662          | 266591                              | 0.3                                                |

[a] The ester bond appeared to have been hydrolysed [b] That lacked the 5-hydroxy on the tryptophan [c] Average area from the reaction performed in triplicate [d] Calculated as: (Absorbance peak area species/Absorbance peak area cystargamide wild type (WT))\*10 [e] MS2 data was not recorded due to interfering masses

## 7Br-tryptophan-Feeding at 1 mM scale

| Detected Cystargamide species               | [M+H] <sup>+</sup> | Absorbance peak area <sup>[c]</sup> | Ratio compared to Cystargamide (WT) <sup>[d]</sup> |
|---------------------------------------------|--------------------|-------------------------------------|----------------------------------------------------|
| Cystargamide (WT)                           | 954.4244           | 3227118                             | 10.0                                               |
| Linear cystargamide <sup>[a]</sup>          | 972.4349           | 11589642                            | 35.9                                               |
| Cystargamide no hydroxylated <sup>[b]</sup> | 938.4294           | 225555                              | 0.7                                                |
| (7BrW) Brominated cystargamide              | 1032.3349          | 348435                              | 1.1                                                |

[a] The ester bond appeared to have been hydrolysed [b] That lacked the 5-hydroxy on the tryptophan [c] Average area from the reaction performed in triplicate [d] Calculated as: (Absorbance peak area species/Absorbance peak area cystargamide wild type (WT))\*10

### Ratios of the detected cystargamide species:

Cyclic cystargamide species : Linear cystargamide species = **0.3:1**

Brominated cystargamide species : Brominated linear cystargamide species = **1:0**

Cyclic cystargamide species : cyclic cystargamide species no hydroxylated= **16:1**

Brominated cyclic cystargamide species : Brominated cystargamide no hydroxylated= **1:0**

Analysis of the extract by LC-MS also revealed quantities of analogues of cystargamide containing alanine [ALA] instead of glycine. In this case, only linear forms in which the ester bond appeared to have been hydrolysed were detected.

| Detected Cystargamide[ALA] species                                                | [M+H] <sup>+</sup> | Absorbance peak area <sup>[c]</sup> | Ratio compared to Cystargamide (WT) <sup>[d]</sup> |
|-----------------------------------------------------------------------------------|--------------------|-------------------------------------|----------------------------------------------------|
| Linear cystargamide[ALA] <sup>[a]</sup>                                           | 986.4500           | 26865004                            | 23.2                                               |
| Linear cystargamide[ALA] no hydroxylated <sup>[a],[b]</sup>                       | 970.4557           | 1320235                             | 1.1                                                |
| (7BrW) Brominated linear cystargamide[ALA] no hydroxylated <sup>[a],[b],[c]</sup> | 1048.3662          | 576202                              | 0.5                                                |
| (7BrW) Brominated linear cystargamide[ALA] <sup>[a],[d]</sup>                     | 1064.3611          | 2078672                             | 1.8                                                |

[a] The ester bond appeared to have been hydrolysed [b] That lacked the 5-hydroxy on the tryptophan [c] Average area from the reaction performed in triplicate [d] Calculated as: (Absorbance peak area species/Absorbance peak area cystargamide wild type (WT))\*10 [e] MS2 data was not recorded due to interfering masses

## 5CI-tryptophan-Feeding at 1 mM scale

| Detected Cystargamide species                                             | [M+H] <sup>+</sup> | Absorbance peak area <sup>[c]</sup> | Ratio compared to Cystargamide (WT) <sup>[d]</sup> |
|---------------------------------------------------------------------------|--------------------|-------------------------------------|----------------------------------------------------|
| Cystargamide (WT)                                                         | 954.424<br>4       | 1590311                             | 10.0                                               |
| Linear cystargamide <sup>[a]</sup>                                        | 972.434<br>9       | 714633                              | 4.5                                                |
| Cystargamide no hydroxylated <sup>[b]</sup>                               | 938.429<br>4       | 155629                              | 1.0                                                |
| (5CIW) Chlorinated linear cystargamide no hydroxylated <sup>[a],[b]</sup> | 990.401            | 191149                              | 1.2                                                |

[a] The ester bond appeared to have been hydrolysed [b] That lacked the 5-hydroxy on the tryptophan [c] Average area from the reaction performed in triplicate [d] Calculated as: (Absorbance peak area species/Absorbance peak area cystargamide wild type (WT))\*10

### Ratios of the detected cystargamide species:

Cyclic cystargamide species : Linear cystargamide species = **1.93:1**

Chlorinated cystargamide species : Chlorinated linear cystargamide species = **0:1**

Cyclic cystargamide species : cyclic cystargamide species no hydroxylated= **10:1**

Chlorinated cyclic cystargamide species : Chlorinated cystargamide no hydroxylated= **0:1**

Analysis of the extract by LC-MS also revealed quantities of analogues of cystargamide containing alanine [ALA] instead of glycine. In this case, only linear forms in which the ester bond appeared to have been hydrolysed were detected.

| Detected Cystargamide[ALA] species                                             | [M+H] <sup>+</sup> | Absorbance peak area <sup>[c]</sup> | Ratio compared to Cystargamide (WT) <sup>[d]</sup> |
|--------------------------------------------------------------------------------|--------------------|-------------------------------------|----------------------------------------------------|
| Linear cystargamide[ALA] <sup>[a]</sup>                                        | 986.4500           | 2719153                             | 17.1                                               |
| Linear cystargamide[ALA] no hydroxylated <sup>[a],[b]</sup>                    | 970.4557           | 13496                               | 0.1                                                |
| (5CIW) Chlorinated linear cystargamide[ALA] no hydroxylated <sup>[a],[b]</sup> | 1004.4167          | 806781                              | 5.1                                                |

[a] The ester bond appeared to have been hydrolysed [b] That lacked the 5-hydroxy on the tryptophan [c] Average area from the reaction performed in triplicate [d] Calculated as: (Absorbance peak area species/Absorbance peak area cystargamide wild type (WT))\*10

## 6Cl-tryptophan-Feeding at 1 mM scale

| Detected Cystargamide species                                             | [M+H] <sup>+</sup> | Absorbance peak area <sup>[c]</sup> | Ratio compared to Cystargamide (WT) <sup>[d]</sup> |
|---------------------------------------------------------------------------|--------------------|-------------------------------------|----------------------------------------------------|
| Cystargamide (WT)                                                         | 954.4244           | 699261                              | 10.0                                               |
| Linear cystargamide <sup>[a]</sup>                                        | 972.4349           | 1326172                             | 19.0                                               |
| Cystargamide no hydroxylated <sup>[b]</sup>                               | 938.4294           | 23596                               | 0.3                                                |
| (6ClW) Chlorinated cystargamide no hydroxylated <sup>[b]</sup>            | 972.3905           | 1277854                             | 18.3                                               |
| (6ClW) Chlorinated linear cystargamide no hydroxylated <sup>[a],[b]</sup> | 990.401            | 1440729                             | 20.6                                               |
| (6ClW) Chlorinated cystargamide                                           | 988.3854           | 4530292                             | 64.8                                               |
| (6ClW) Chlorinated linear cystargamide <sup>[a]</sup>                     | 1006.396           | 7364948                             |                                                    |
|                                                                           | 0                  |                                     | 100.5                                              |

[a] The ester bond appeared to have been hydrolysed [b] That lacked the 5-hydroxy on the tryptophan [c] Average area from the reaction performed in triplicate [d] Calculated as: (Absorbance peak area species/Absorbance peak area cystargamide wild type (WT))\*10

### Ratios of the detected cystargamide species:

Cyclic cystargamide species : Linear cystargamide species = **0.6:1**

Chlorinated cystargamide species : Chlorinated linear cystargamide species = **0.1:1**

Cyclic cystargamide species : cyclic cystargamide species no hydroxylated= **4:1**

Chlorinated cyclic cystargamide species : Chlorinated cystargamide no hydroxylated= **4:1**

Analysis of the extract by LC-MS also revealed quantities of analogues of cystargamide containing alanine [ALA] instead of glycine. In this case, only linear forms in which the ester bond appeared to have been hydrolysed were detected.

| Detected Cystargamide[ALA] species                                             | [M+H] <sup>+</sup> | Absorbance peak area <sup>[c]</sup> | Ratio compared to Cystargamide (WT) <sup>[d]</sup> |
|--------------------------------------------------------------------------------|--------------------|-------------------------------------|----------------------------------------------------|
| Linear cystargamide[ALA] <sup>[a]</sup>                                        | 986.4500           | 4926993                             | 70.5                                               |
| Linear cystargamide[ALA] no hydroxylated <sup>[a],[b]</sup>                    | 970.4557           | 102532                              | 1.5                                                |
| (6ClW) Chlorinated linear cystargamide[ALA] no hydroxylated <sup>[a],[b]</sup> | 1004.4167          | 7641792                             | 109.3                                              |
| (6ClW) Chlorinated linear cystargamide[ALA] <sup>[a]</sup>                     | 1020.4116          | 24151097                            | 345.4                                              |

[a] The ester bond appeared to have been hydrolysed [b] That lacked the 5-hydroxy on the tryptophan [c] Average area from the reaction performed in triplicate [d] Calculated as: (Absorbance peak area species/Absorbance peak area cystargamide wild type (WT))\*10

## 7Cl-tryptophan-Feeding at 1 mM scale

| Detected Cystargamide species                                             | [M+H] <sup>+</sup> | Absorbance peak area <sup>[c]</sup> | Ratio compared to Cystargamide (WT) <sup>[d]</sup> |
|---------------------------------------------------------------------------|--------------------|-------------------------------------|----------------------------------------------------|
| Cystargamide (WT)                                                         | 954.4244           | 2106653                             | 10.0                                               |
| Linear cystargamide <sup>[a]</sup>                                        | 972.4349           | 1291560                             | 6.1                                                |
| Cystargamide no hydroxylated <sup>[b]</sup>                               | 938.4294           | 300104                              | 1.4                                                |
| (7ClW) Chlorinated cystargamide no hydroxylated <sup>[b]</sup>            | 972.3905           | 668116                              | 3.2                                                |
| (7ClW) Chlorinated linear cystargamide no hydroxylated <sup>[a],[b]</sup> | 990.401            | 94561                               | 0.4                                                |
| (7ClW) Chlorinated cystargamide <sup>[e]</sup>                            | 988.3854           | 5313075                             | 25.2                                               |
| (7ClW) Chlorinated linear cystargamide <sup>[a]</sup>                     | 1006.396           | 2059653                             | 9.8                                                |

[a] The ester bond appeared to have been hydrolysed [b] That lacked the 5-hydroxy on the tryptophan [c] Average area from the reaction performed in triplicate [d] Calculated as: (Absorbance peak area species/Absorbance peak area cystargamide wild type (WT))\*10 [e] MS2 data was not recorded due to interfering masses

### Ratios of the detected cystargamide species:

Cyclic cystargamide species : Linear cystargamide species = **2:1**

Chlorinated cystargamide species : Chlorinated linear cystargamide species = **3:1**

Cyclic cystargamide species : cyclic cystargamide species no hydroxylated= **8:1**

Chlorinated cyclic cystargamide species : Chlorinated cystargamide no hydroxylated= **8:1**

Analysis of the extract by LC-MS also revealed quantities of analogues of cystargamide containing alanine [ALA] instead of glycine. In this case, only linear forms in which the ester bond appeared to have been hydrolysed were detected.

| Detected Cystargamide[ALA] species                                             | [M+H] <sup>+</sup> | Absorbance peak area <sup>[c]</sup> | Ratio compared to Cystargamide (WT) <sup>[d]</sup> |
|--------------------------------------------------------------------------------|--------------------|-------------------------------------|----------------------------------------------------|
| Linear cystargamide[ALA] <sup>[a]</sup>                                        | 986.4500           | 5187247                             | 24.6                                               |
| Linear cystargamide[ALA] no hydroxylated <sup>[a],[b]</sup>                    | 970.4557           | 654399                              | 3.1                                                |
| (7ClW) Chlorinated linear cystargamide[ALA] no hydroxylated <sup>[a],[b]</sup> | 1004.4167          | 956515                              | 4.5                                                |
| (7ClW) Chlorinated linear cystargamide[ALA] <sup>[a]</sup>                     | 1020.4116          | 7761149                             | 36.8                                               |

[a] The ester bond appeared to have been hydrolysed [b] That lacked the 5-hydroxy on the tryptophan [c] Average area from the reaction performed in triplicate [d] Calculated as: (Absorbance peak area species/Absorbance peak area cystargamide wild type (WT))\*10

Results demonstrated that all of the halotryptophans incorporated into cystargamide, generating new to nature halogenated analogues. As the concentration of tryptophan had no major impacted the amount of halo-cystargamide produced (see tables below) , we selected to scale up of the feeding of 6-bromotryptophan at 0.25 mM .

### **Scaled up feeding experiment with 6-bromotryptophan**

A starter culture was prepared by inoculation of 50 mL GY medium in a 250 mL baffled conical flask with 2 mL glycerol mycelium stock, and fermented for 48 h at 28 °C and 200 rpm in an incubator with a 2.54 cm throw.

Fermentation cultures (8 L) were prepared by inoculating the production medium (0.4 g/L glucose, 0.8 g/L galactose, 0.8 g/L maltose, 1.6 g/L dextrin, 0.8 g/L soya peptone and 0.3 g/L ammonium sulfate, supplemented with 73 mg/L 6-bromotryptophan [0.26 mM] prepared as previously described<sup>1</sup> with starter culture (10% inoculum), and fermented for 72 h at 28 °C and 200 rpm.

The fermentation cultures were centrifuged (6000 rpm, 8980g, 30 min) and the supernatant was extracted with XAD7-HP resin overnight at 4 °C (20 mL resin / L supernatant). The resin was washed liberally with water, after which bound metabolites were eluted in 400 mL volumes each of 100% aqueous methanol. The presence of cystargamide and bromocystargamide was confirmed by UPLC and the extract was fractionated by gel permeation chromatography, using a 200 mL column of Sephadex LH-20 resin in methanol under gravity flow (25-30 cm/h). Cystargamide and bromocystargamide, both in their linear and cyclised forms, eluted between 120 – 180 mL. These fractions were further fractionated by RP-HPLC, using a Waters XBridge Prep Phenyl 10 x 250 mm 5 µm column with an isocratic gradient of 70% aqueous methanol and 0.1% formic acid and a flow rate of 6 mL/min, monitoring UV absorbance at 280 nm. Cystargamide was found to elute at 10.5 minutes, followed by bromocystargamide at 11 minutes. Solvent was removed from fractions using a Genevac centrifugal vacuum concentrator.

Throughout the purification, fractions were analysed by UPLC (95% acetonitrile and 0.1% trifluoroacetic acid with a flow rate of 0.6 ml/min, monitoring between 220 and 400 nm) or by LC-HRMS (XBridge C18 2.1 x 150 mm column, 5-95% 0.1% formic acid/water; acetonitrile, monitoring at 254 and 280 nm, HRMS:  $m/z$  calcd for  $C_{49}H_{59}BrN_7O_{13}$   $[M+H]^+$ : 1034.3349; found: 1032.3321.

The cystargamide and bromocystargamide were produced in linear and cyclic forms.

Extraction and purification resulted in a pure fraction containing 1.0 mg 6-bromocystargamide **9**. By comparison of the absorbance peak areas it could be estimated that the parent unhalogenated cystargamide **62**, a bromo-cystargamide analogue that lacked the 5-hydroxy on the tryptophan **63** and bromocystargamide **9**, were present in an approximate 10:0.2:1.4 ratio.

# LC-MSMS data for cystargamide and its derivatives

## Natural Cyclic Cystargamide (62)

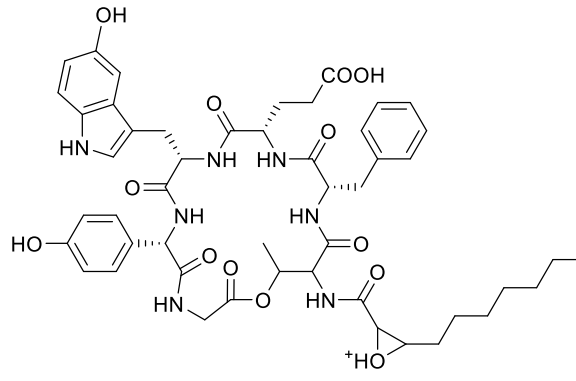

Chemical Formula:  $C_{49}H_{60}N_7O_{13}^+$   
Exact Mass: 954.4244

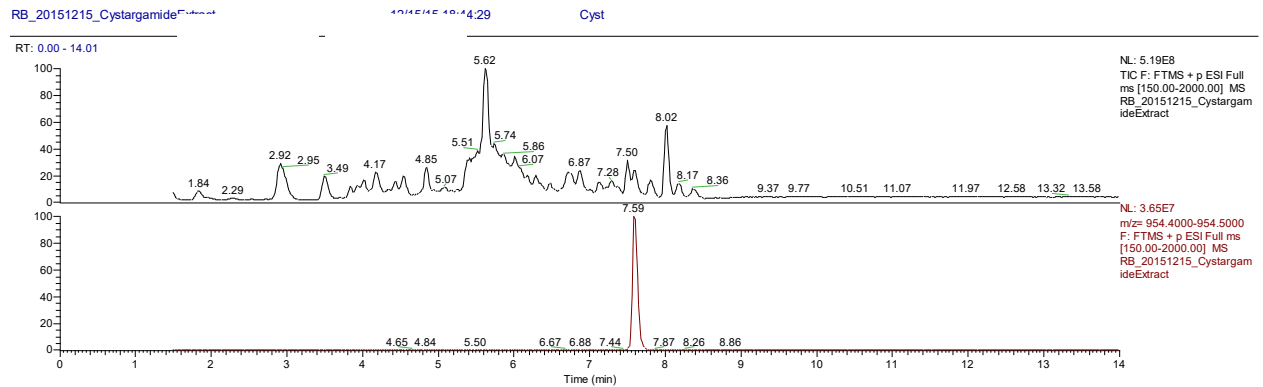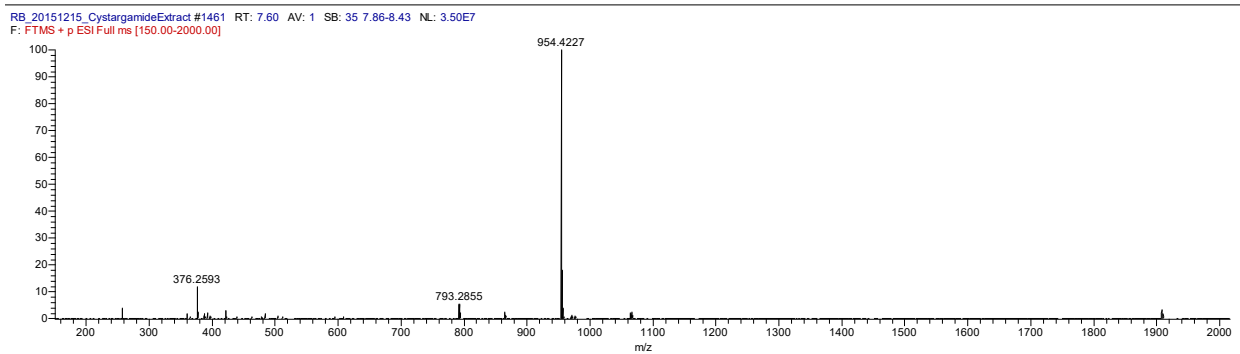



## MS2 spectrum and fragment assignment

RB\_20151215\_CystargamideExtract #1443 RT: 7.54 AV: 1 NL: 5.15E4  
 F: ITMS + p ESI d Full ms2 954.42@cid35.00 [250.00-2000.00]

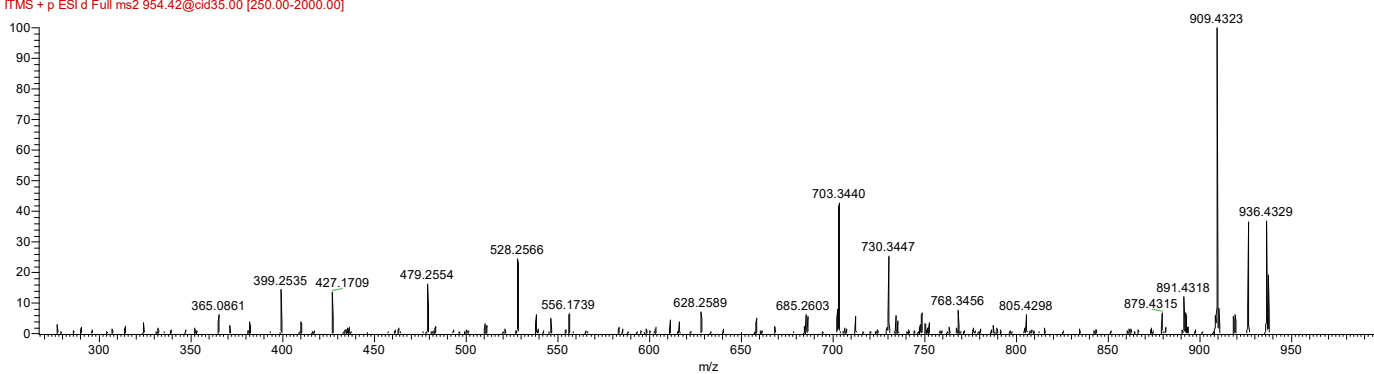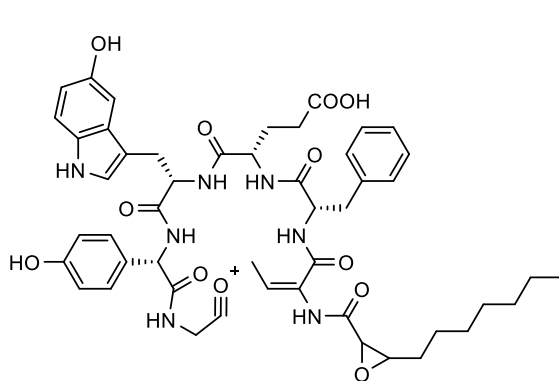

Chemical Formula:  $C_{49}H_{58}N_7O_{12}^+$   
 Exact Mass: 936.4138

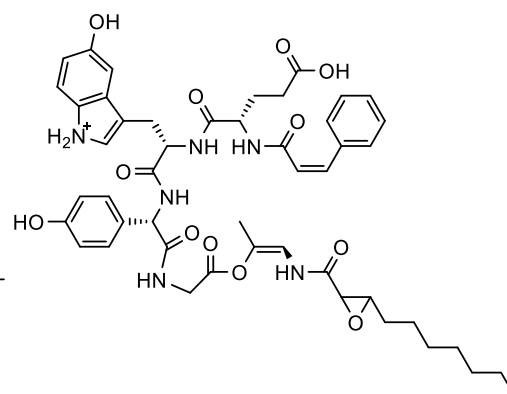

Chemical Formula:  $C_{48}H_{57}N_6O_{12}^+$   
 Exact Mass: 909.4029

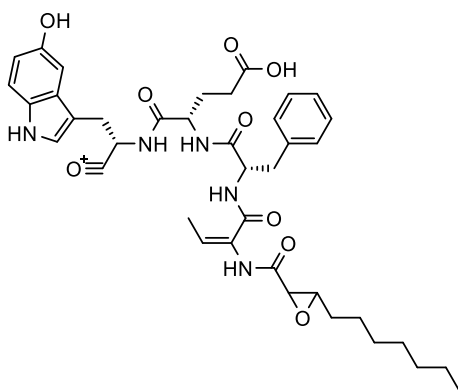

Chemical Formula:  $C_{39}H_{48}N_5O_9^+$   
 Exact Mass: 730.3447

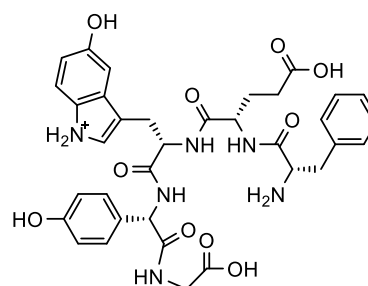

Chemical Formula:  $C_{35}H_{39}N_6O_{10}^+$   
 Exact Mass: 703.2722

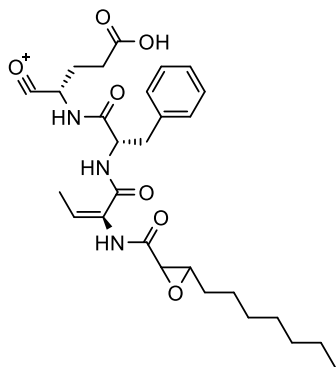

Chemical Formula:  $C_{28}H_{38}N_3O_7^+$   
 Exact Mass: 528.2704

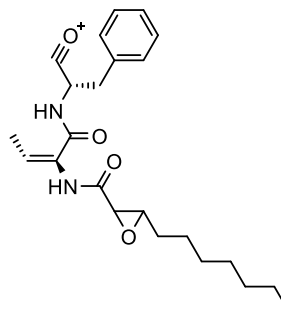

Chemical Formula:  $C_{23}H_{31}N_2O_4^+$   
 Exact Mass: 399.2278

## Linear cystargamide

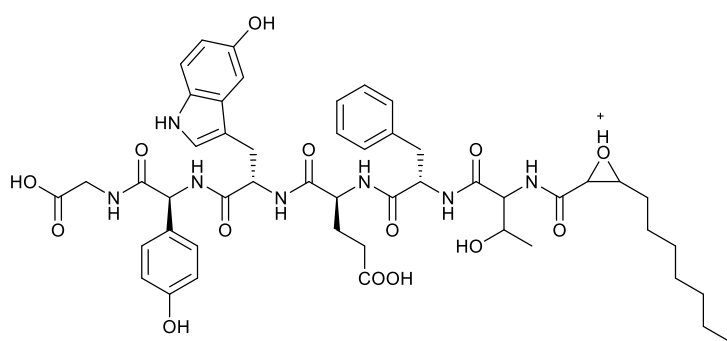

Chemical Formula:  $C_{49}H_{62}N_7O_{14}^+$   
 Exact Mass: 972.4349

F:\cyst ms data\PP\_20150731\_26

08/01/15 11:06:57

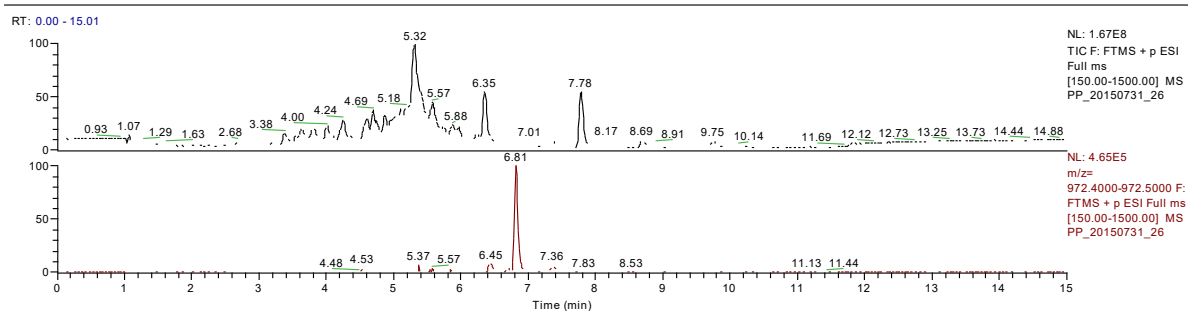

PP\_20150731\_26 #1600 RT: 6.79 AV: 1 SB: 40 7.86-8.43 NL: 1.48E5

F: FTMS + p ESI Full ms [150.00-1500.00]

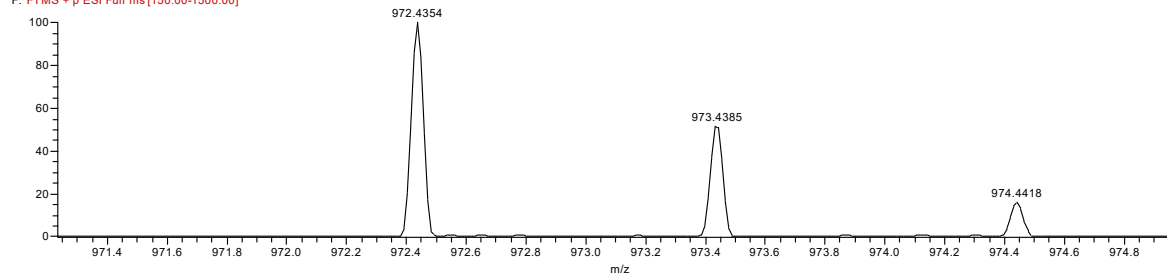

MS2 spectrum and fragment assignment

PP\_20150731\_26 #1601 RT: 6.79 AV: 1 NL: 2.59E4  
 F: ITMS + c ESI d Full m/z 972.44@ad35.00 [255.00-985.00]

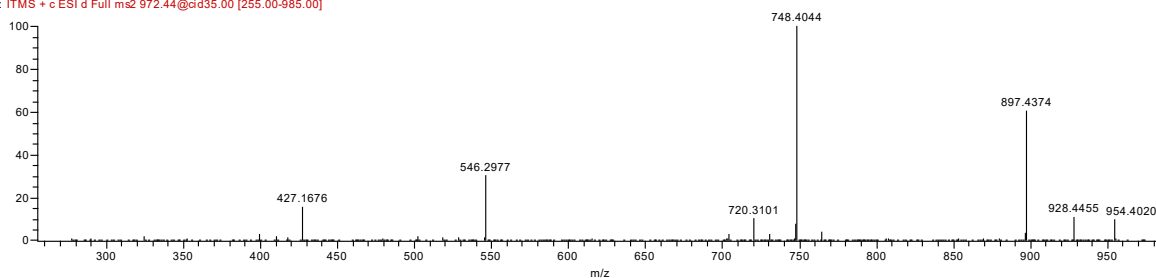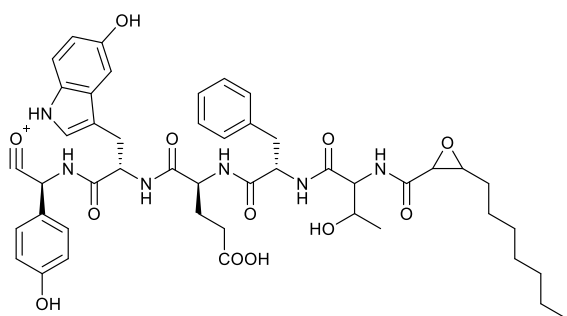

Chemical Formula:  $C_{47}H_{57}N_6O_{12}^+$   
 Exact Mass: 897.4029

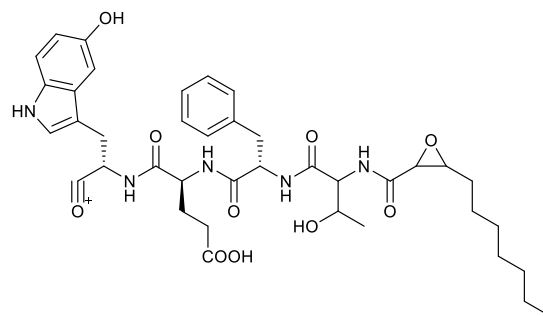

Chemical Formula:  $C_{39}H_{50}N_5O_{10}^+$   
 Exact Mass: 748.3552

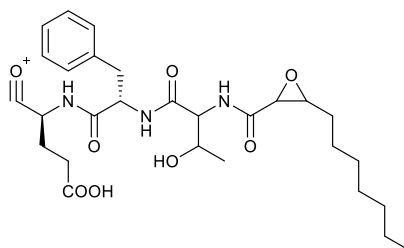

Chemical Formula:  $C_{28}H_{40}N_3O_8^+$   
 Exact Mass: 546.2810

## Natural cystargamide un-hydroxylated

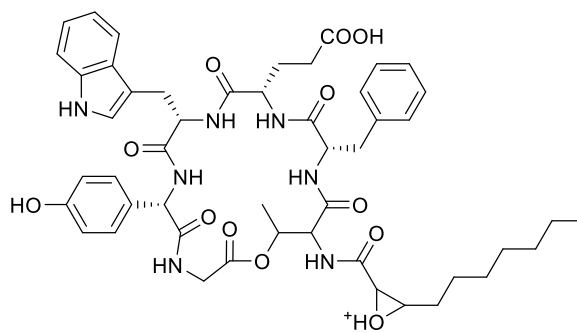

Chemical Formula:  $C_{49}H_{60}N_7O_{12}^+$   
 Exact Mass: 938.4294

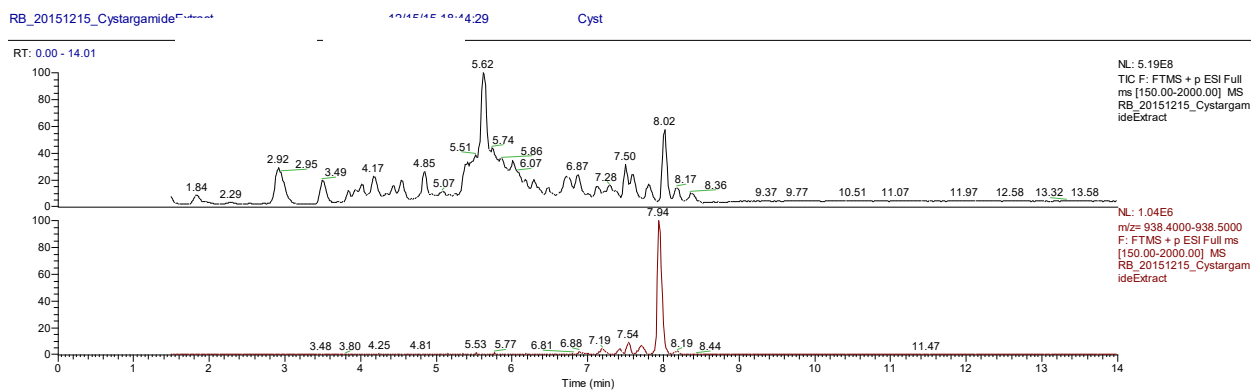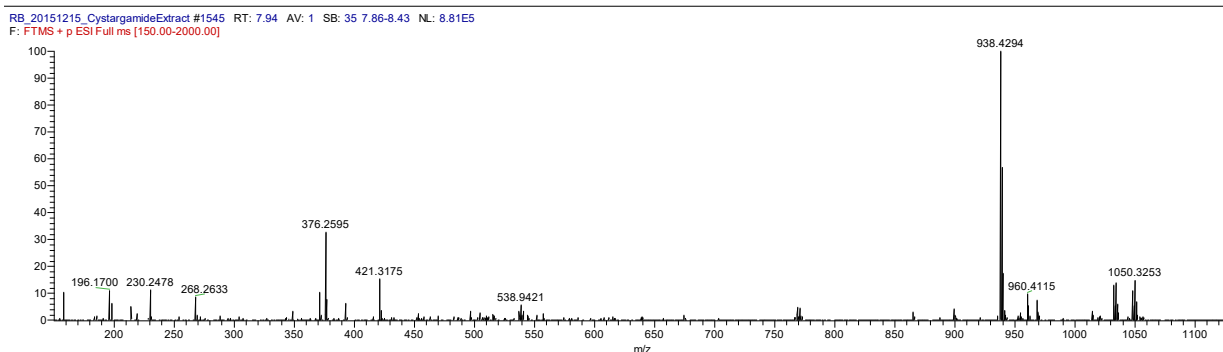

## MS2 spectrum and fragment assignment

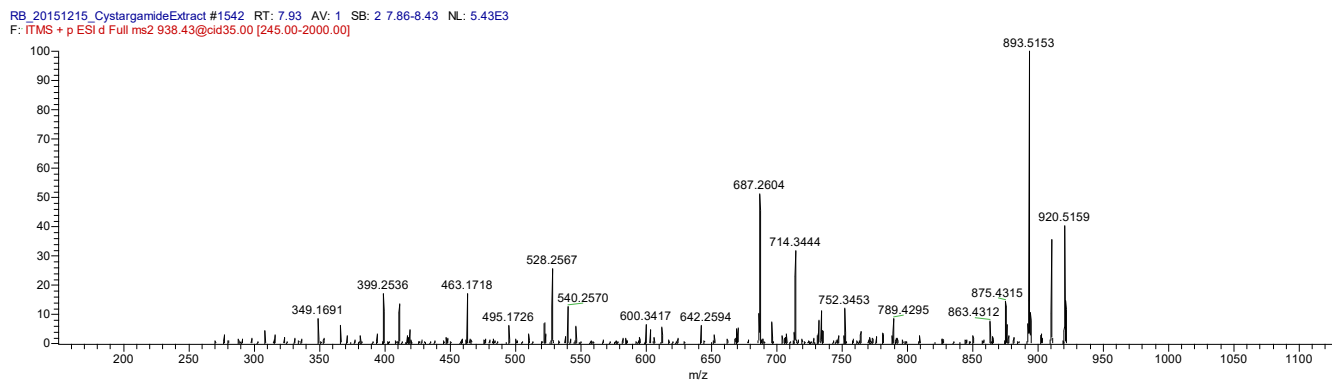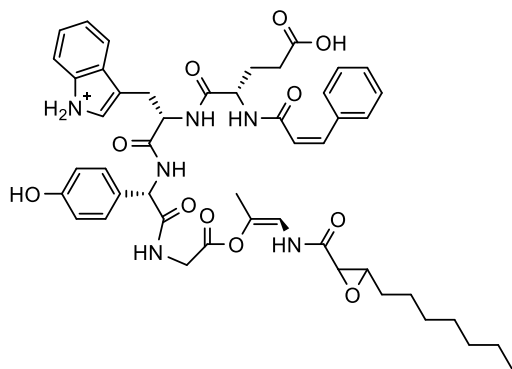

Chemical Formula:  $C_{48}H_{57}N_6O_{11}^+$   
Exact Mass: 893.4080

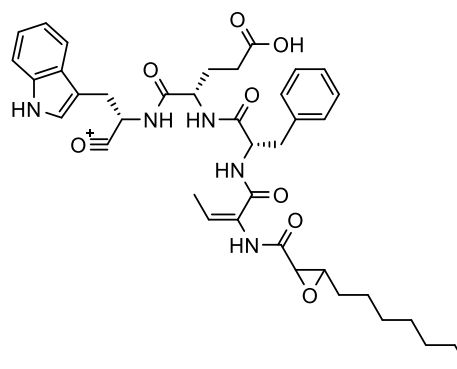

Chemical Formula:  $C_{39}H_{48}N_5O_8^+$   
Exact Mass: 714.3497

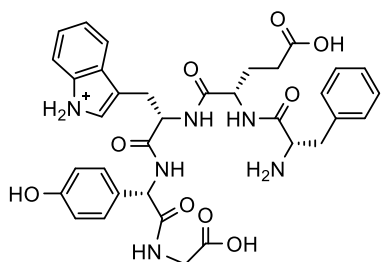

Chemical Formula:  $C_{35}H_{39}N_6O_9^+$   
 Exact Mass: 687.2773

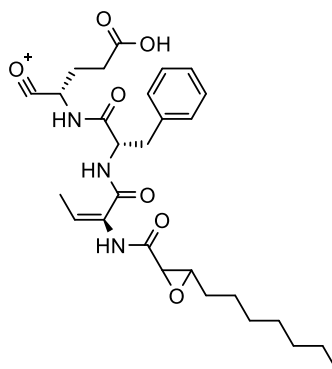

Chemical Formula:  $C_{28}H_{38}N_3O_7^+$   
 Exact Mass: 528.2704

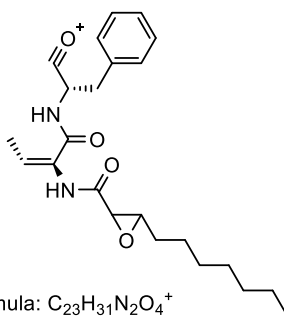

Chemical Formula:  $C_{23}H_{31}N_2O_4^+$   
 Exact Mass: 399.2278

# Bromo-cystargamide un-hydroxylated (63)

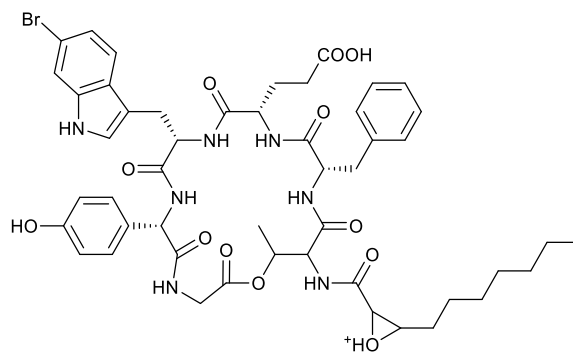

Chemical Formula:  $C_{49}H_{59}BrN_7O_{12}^+$   
 Exact Mass: 1016.3400

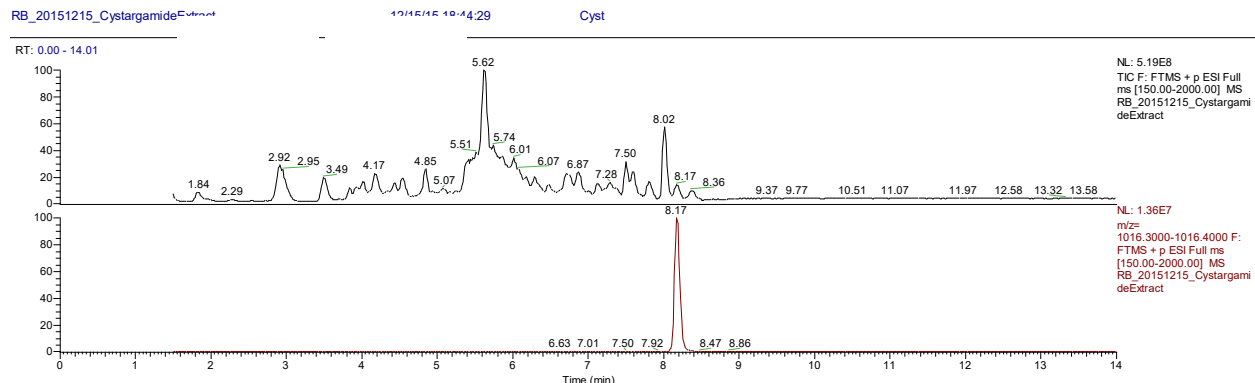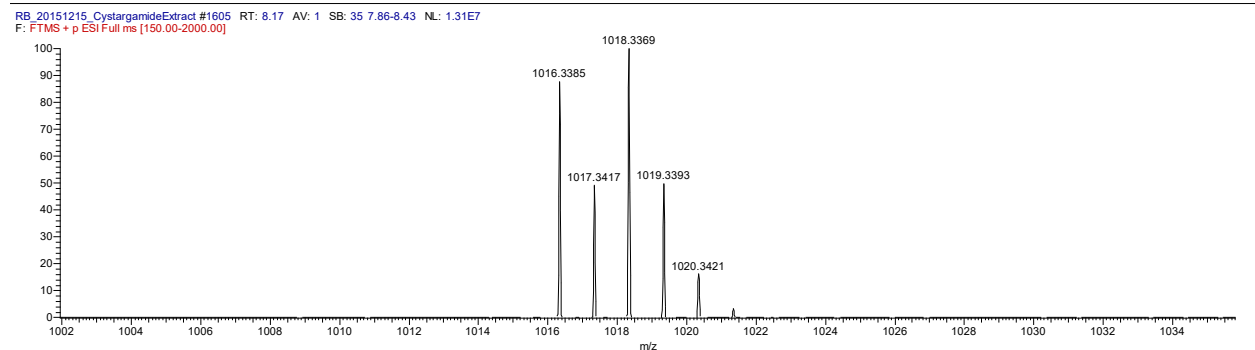

## MS2 spectrum and fragment assignment

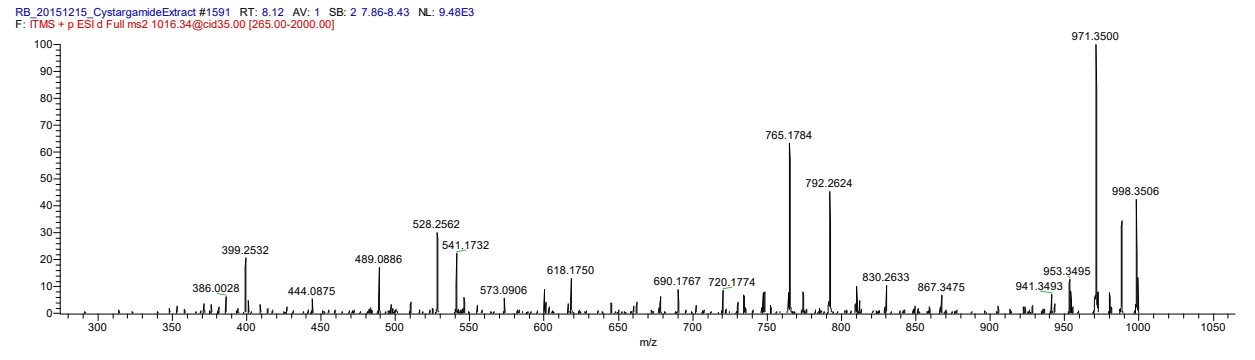

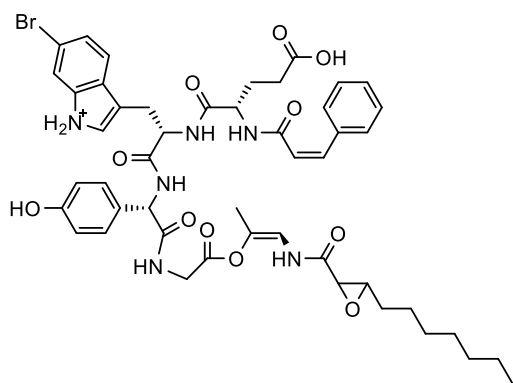

Chemical Formula:  $C_{48}H_{56}BrN_6O_{11}^+$   
Exact Mass: 971.3185

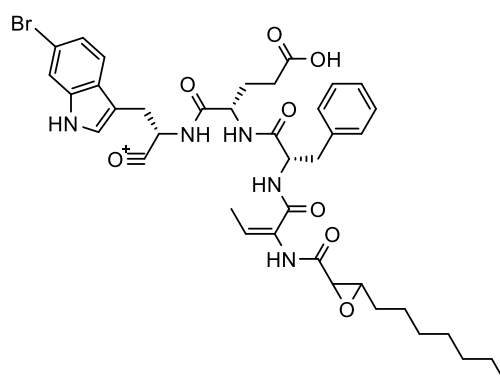

Chemical Formula:  $C_{39}H_{47}BrN_5O_8^+$   
Exact Mass: 792.2603

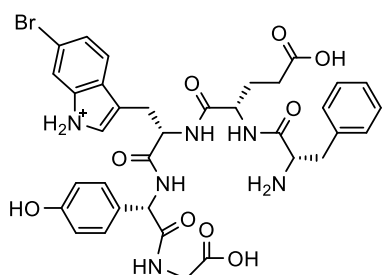

Chemical Formula:  $C_{35}H_{38}BrN_6O_9^+$   
Exact Mass: 765.1878

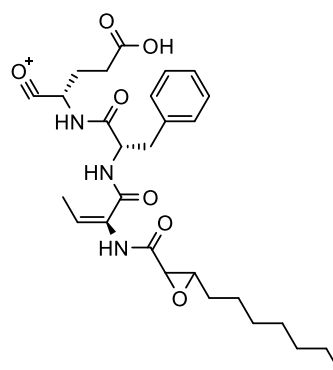

Chemical Formula:  $C_{28}H_{38}N_3O_7^+$   
Exact Mass: 528.2704

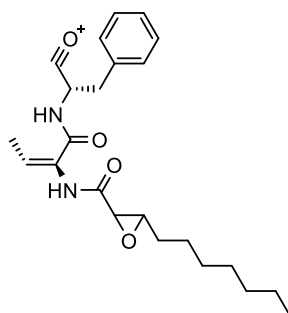

Chemical Formula:  $C_{23}H_{31}N_2O_4^+$   
Exact Mass: 399.2278

## Brominated linear cystargamide un-hydroxylated

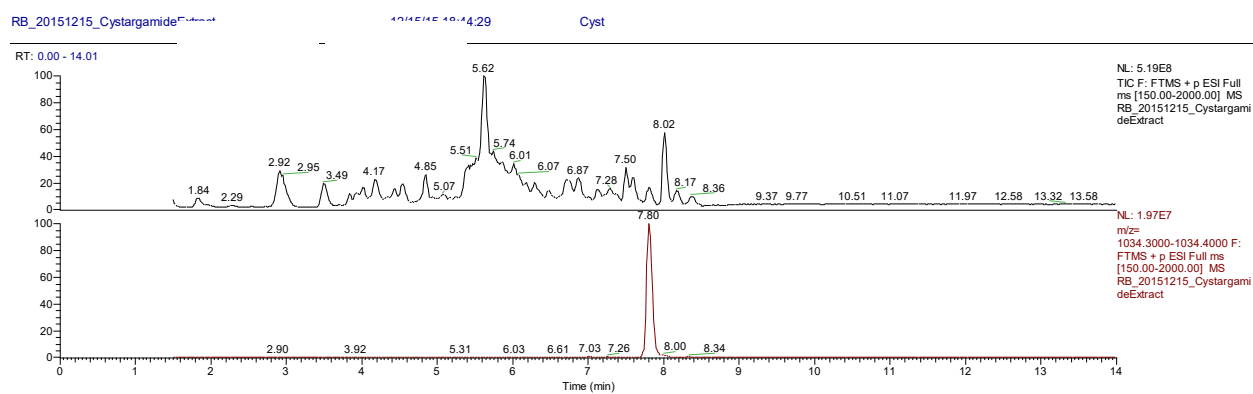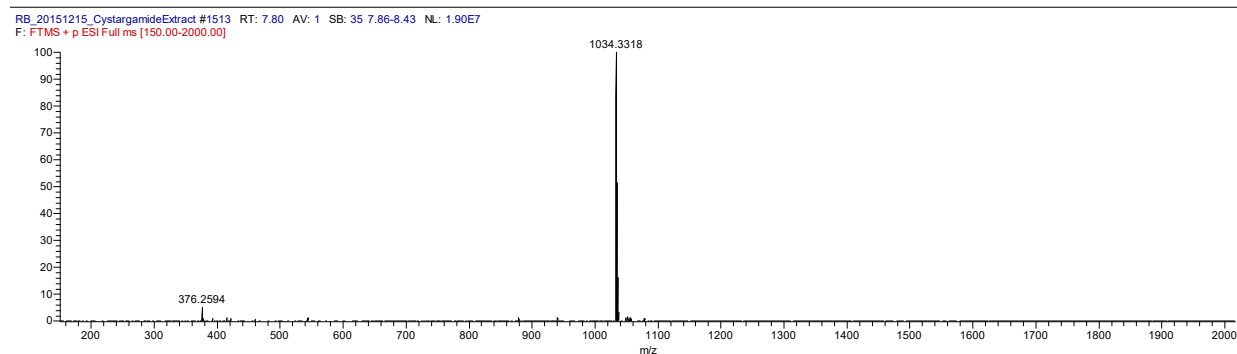

## Brominated cystargamide (9)

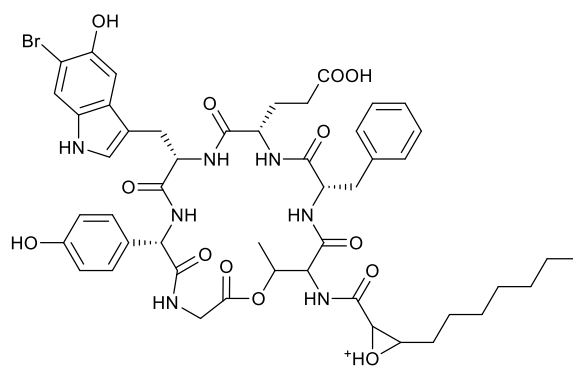

Chemical Formula:  $C_{49}H_{59}BrN_7O_{13}^+$   
Exact Mass: 1032.3349



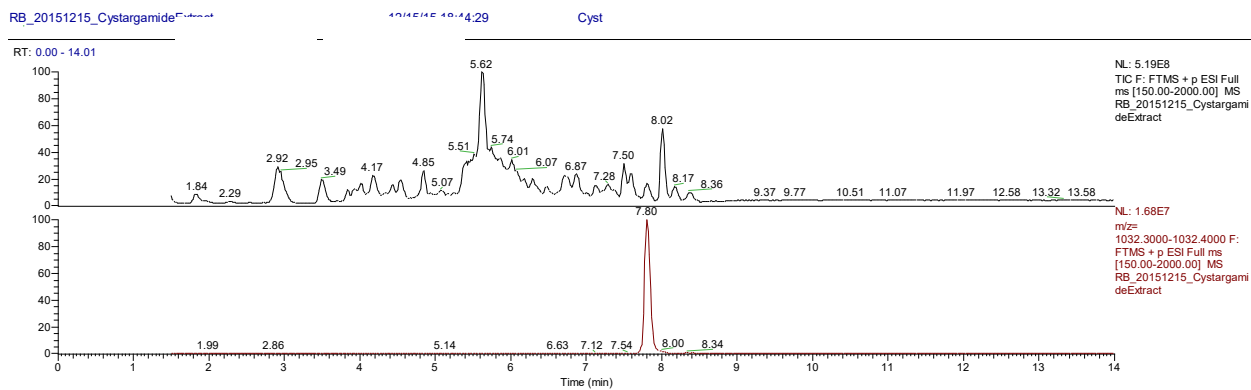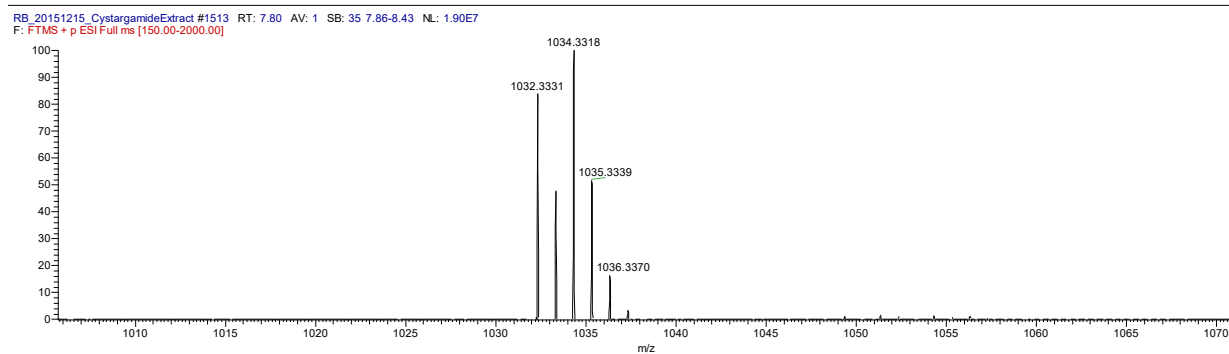

## MS2 spectrum and fragment assignment

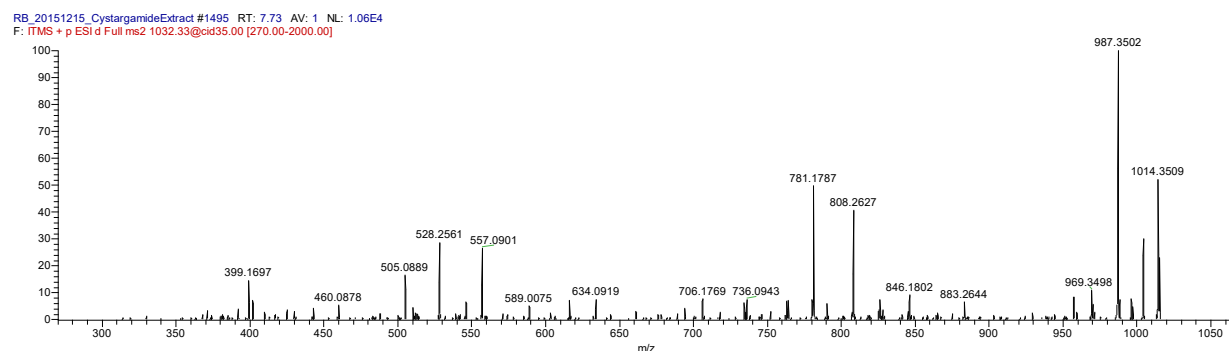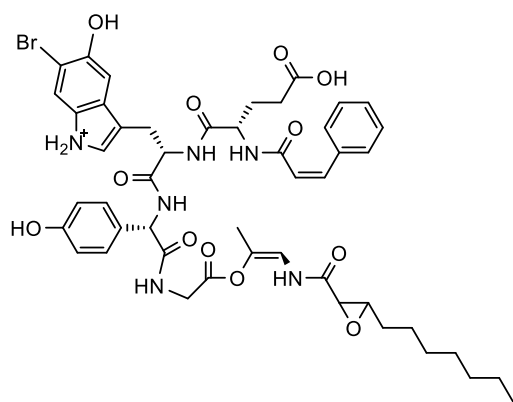

Chemical Formula:  $C_{48}H_{56}BrN_6O_{12}^+$   
Exact Mass: 987.3134

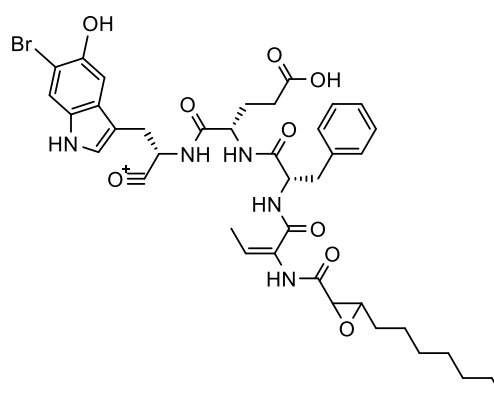

Chemical Formula:  $C_{39}H_{47}BrN_5O_9^+$   
Exact Mass: 808.2552

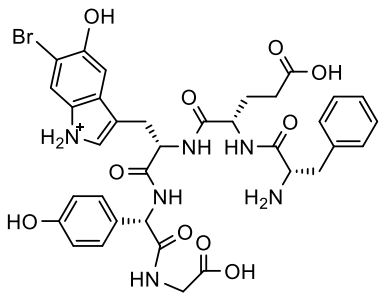

Chemical Formula:  $C_{35}H_{38}BrN_6O_{10}^+$   
Exact Mass: 781.1827

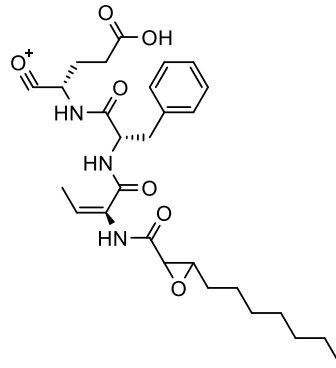

Chemical Formula:  $C_{28}H_{38}N_3O_7^+$   
Exact Mass: 528.2704

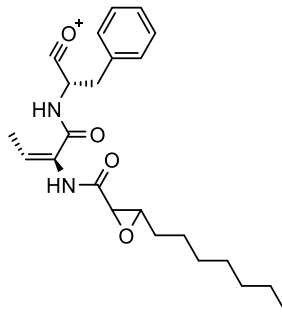

Chemical Formula:  $C_{23}H_{31}N_2O_4^+$   
Exact Mass: 399.2278

## Linear cystargamide[ALA]

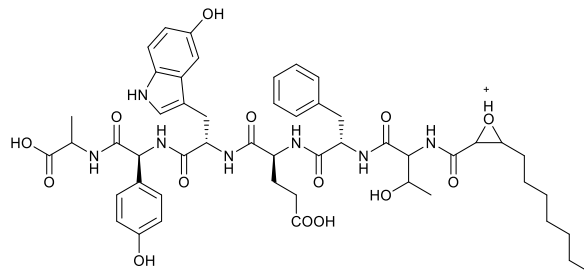

Chemical Formula:  $C_{60}H_{68}N_7O_{14}^+$   
Exact Mass: 986.4506

File: ms\_data\PP\_20150731\_46

18:16:16

RT: 0.00 - 15.00

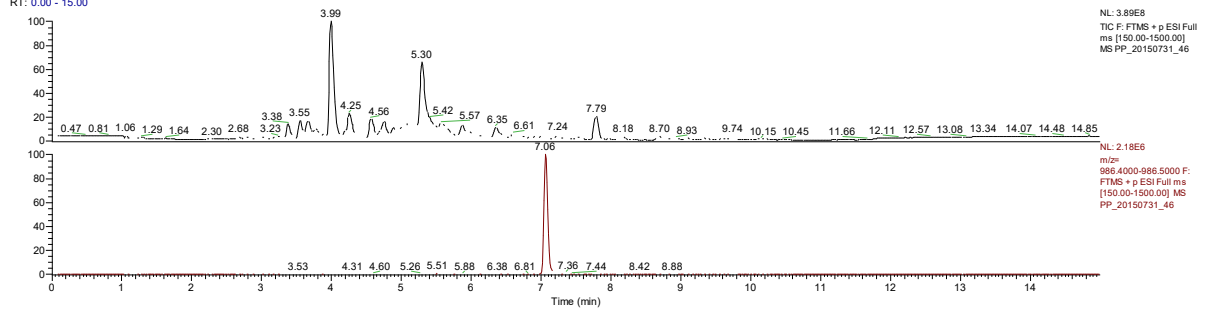

NL: 3.89E5  
TIC F: FTMS + p ESI Full  
ms [150.00-1500.00]  
MS PP\_20150731\_46

NL: 2.18E6  
m/z  
986.4000-986.5000 F:  
FTMS + p ESI Full ms  
[150.00-1500.00] MS  
PP\_20150731\_46

PP\_20150731\_46 #1678 RT: 7.06 AV: 1 SB: 41 7.86-8.43 NL: 2.08E6

F: FTMS + p ESI Full ms [150.00-1500.00]

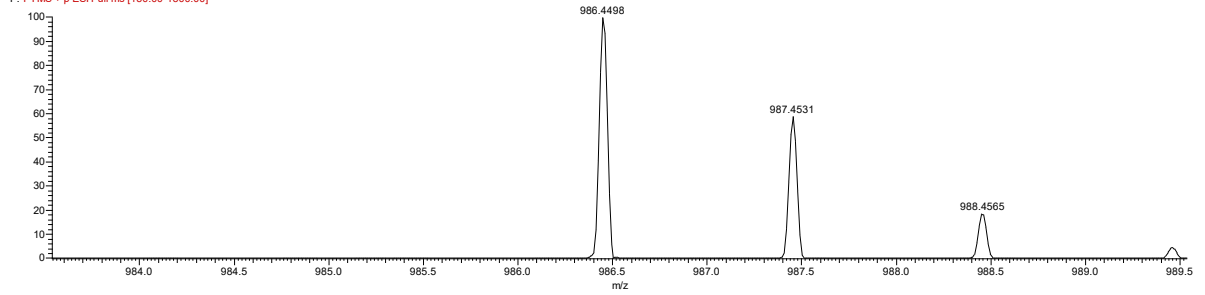

## MS2 spectrum and fragment assignment

PP\_20150731\_46 #1673 RT: 7.04 AV: 1 NL: 2.84E5

F: ITMS + c ESI d Full ms2 986.45@cid35.00 [260.00-1000.00]

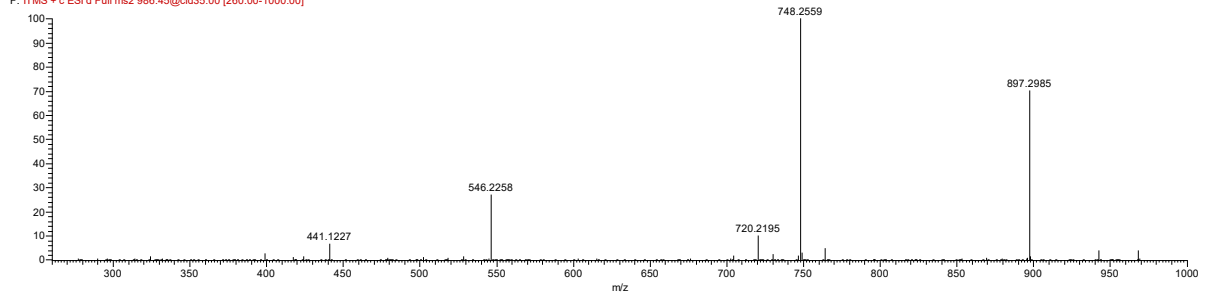

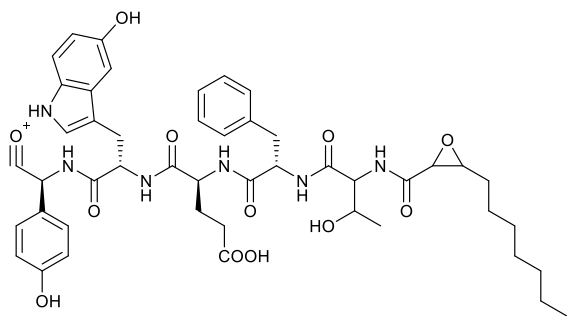

Chemical Formula:  $C_{47}H_{57}N_6O_{12}^+$   
 Exact Mass: 897.4029

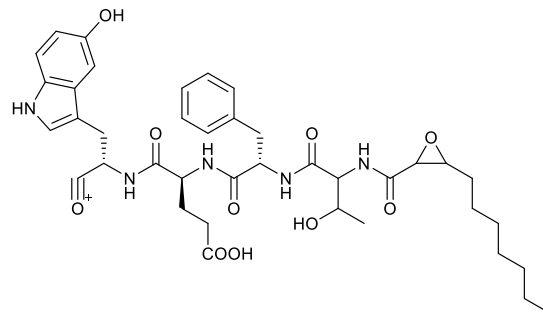

Chemical Formula:  $C_{39}H_{50}N_5O_{10}^+$   
 Exact Mass: 748.3552

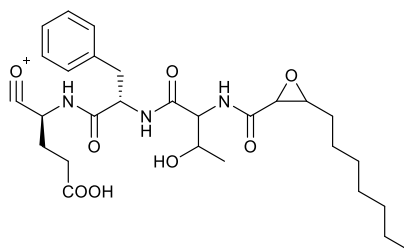

Chemical Formula:  $C_{28}H_{40}N_3O_8^+$   
 Exact Mass: 546.2810

### Linear cystargamide[ALA] un hydroxylated

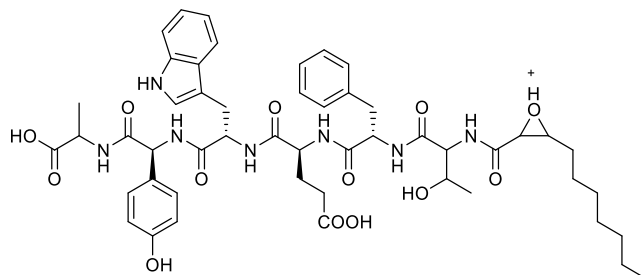

Chemical Formula:  $C_{50}H_{64}N_7O_{13}^+$   
 Exact Mass: 970.4557

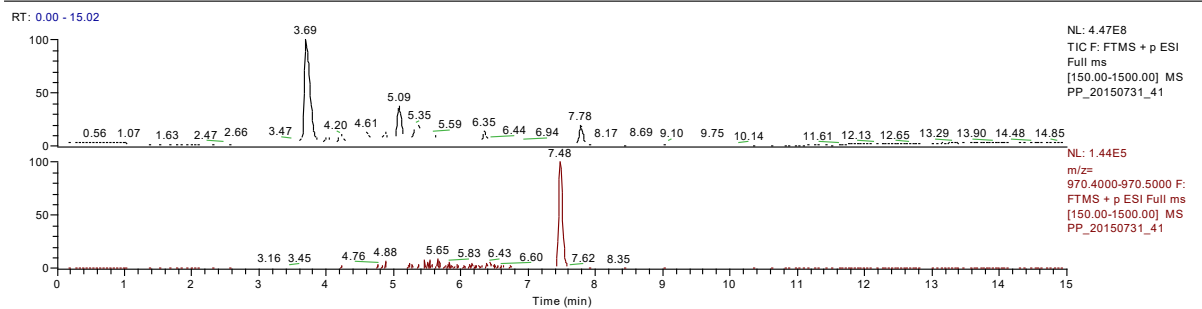

PP\_20150731\_41 #1807 RT: 7.46 AV: 1 SB: 41 7.86-8.43 NL: 1.19E5  
F: FTMS + p ESI Full ms [150.00-1500.00]

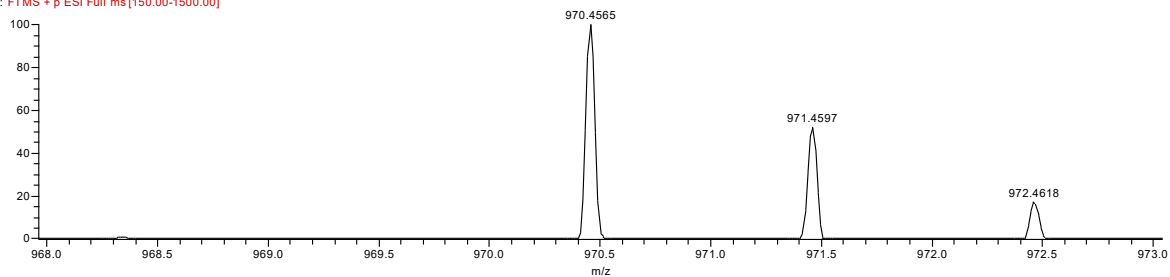

### MS2 spectrum and fragment assignment

PP\_20150731\_41 #1809 RT: 7.47 AV: 1 NL: 1.31E4  
F: ITMS + c ESI d Full ms 2 970.46 @d35.00 [255.00-985.00]

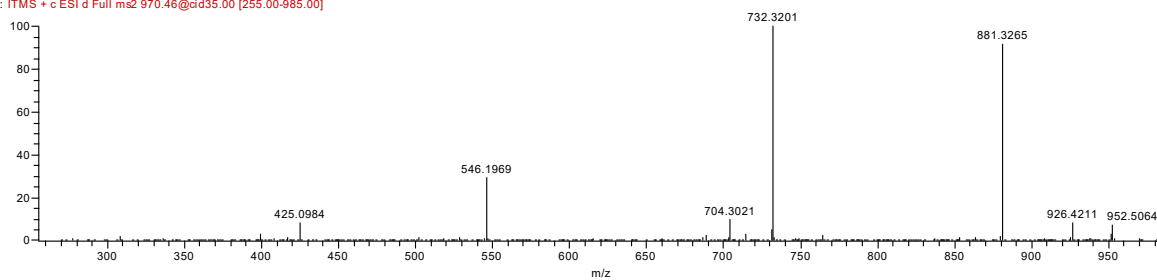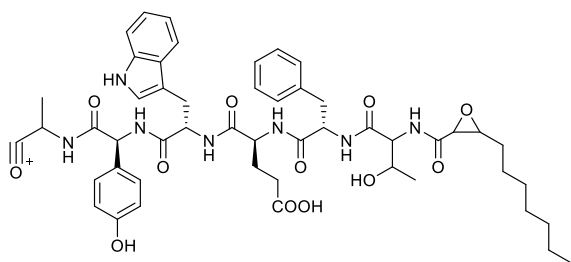

Chemical Formula:  $C_{50}H_{62}N_7O_{12}^+$   
Exact Mass: 952.4451

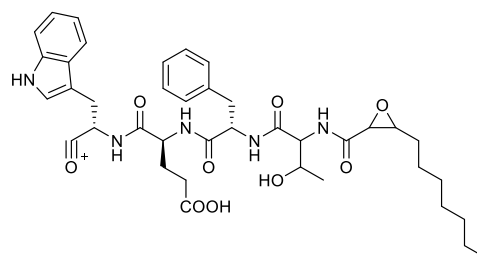

Chemical Formula:  $C_{39}H_{50}N_5O_9^+$   
Exact Mass: 732.3603

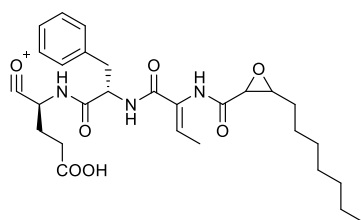

Chemical Formula:  $C_{28}H_{38}N_3O_7^+$   
Exact Mass: 528.2704

## Brominated linear cystargamide[ALA] un hydroxylated

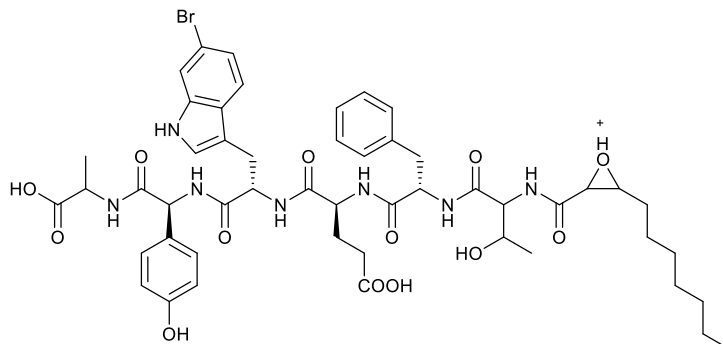

Chemical Formula:  $C_{50}H_{63}BrN_7O_{13}^+$   
Exact Mass: 1048.3662

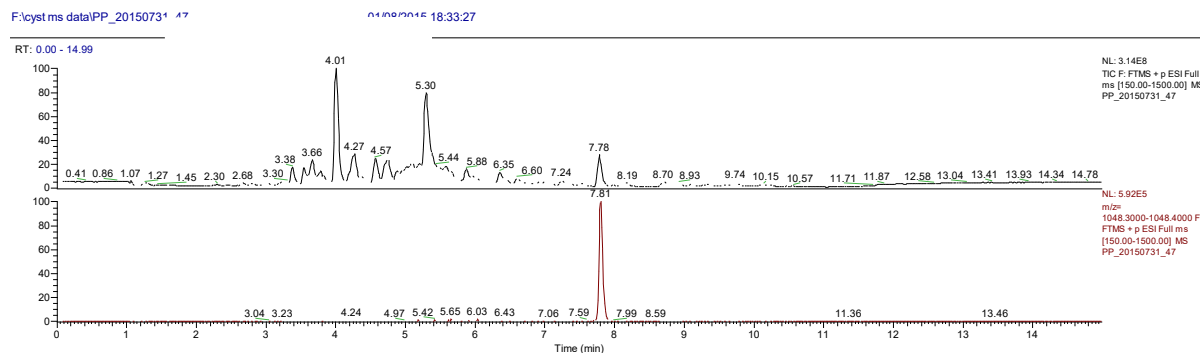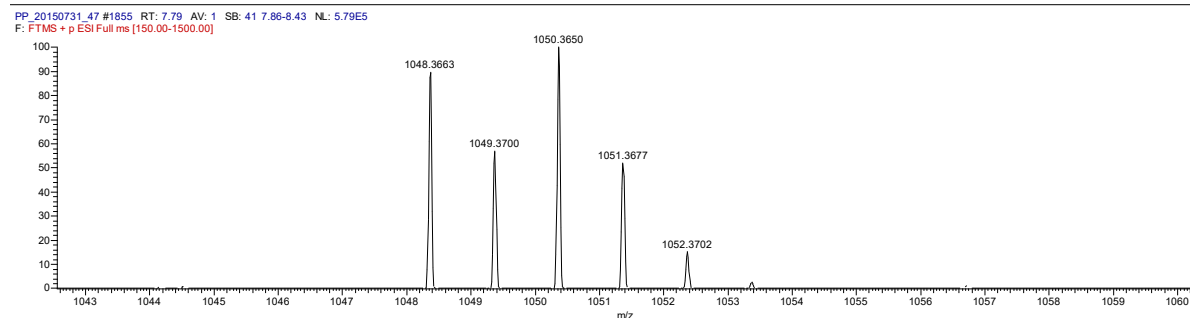

## MS2 spectrum and fragment assignment

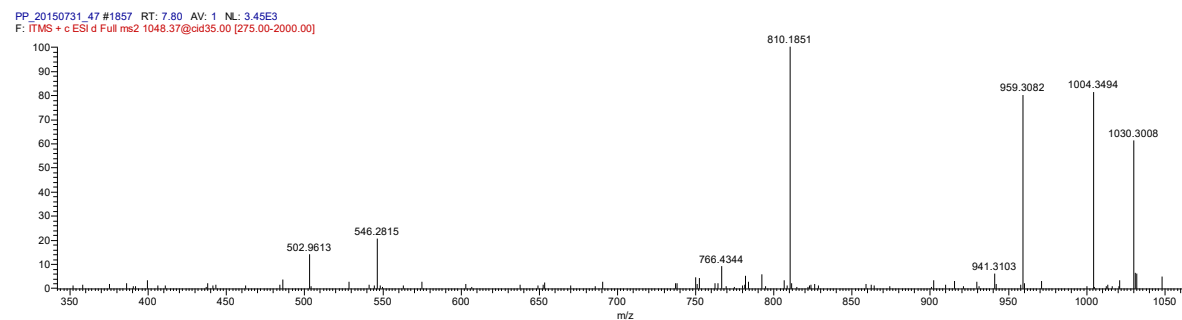

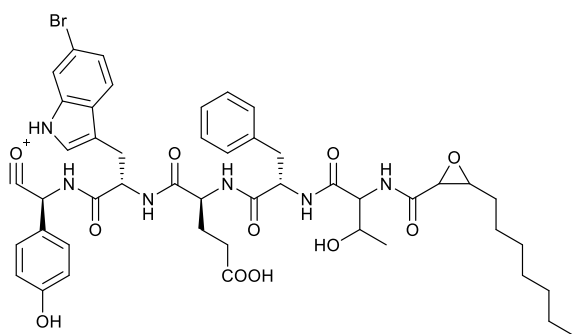

Chemical Formula:  $C_{47}H_{56}BrN_6O_{11}^+$   
Exact Mass: 959.3185

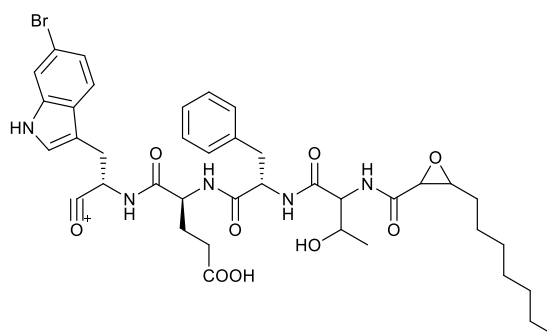

Chemical Formula:  $C_{39}H_{49}BrN_5O_9^+$   
Exact Mass: 810.2708

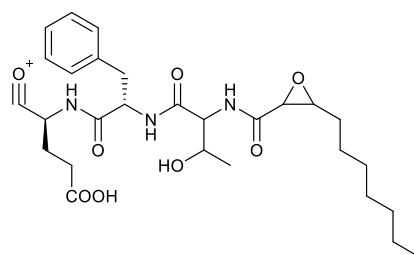

Chemical Formula:  $C_{28}H_{40}N_3O_8^+$   
Exact Mass: 546.2810

### Brominated linear cystargamide[ALA]

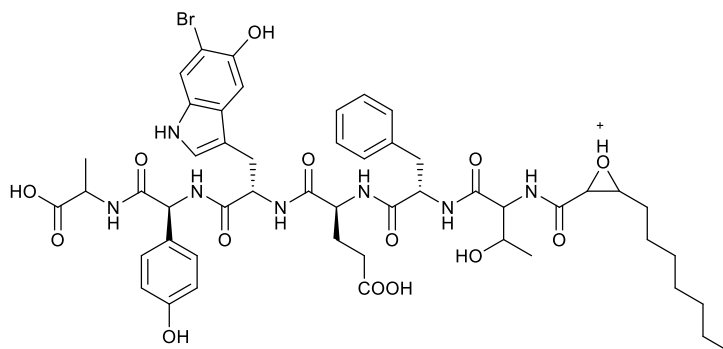

Chemical Formula:  $C_{50}H_{63}BrN_7O_{14}^+$   
Exact Mass: 1064.3611

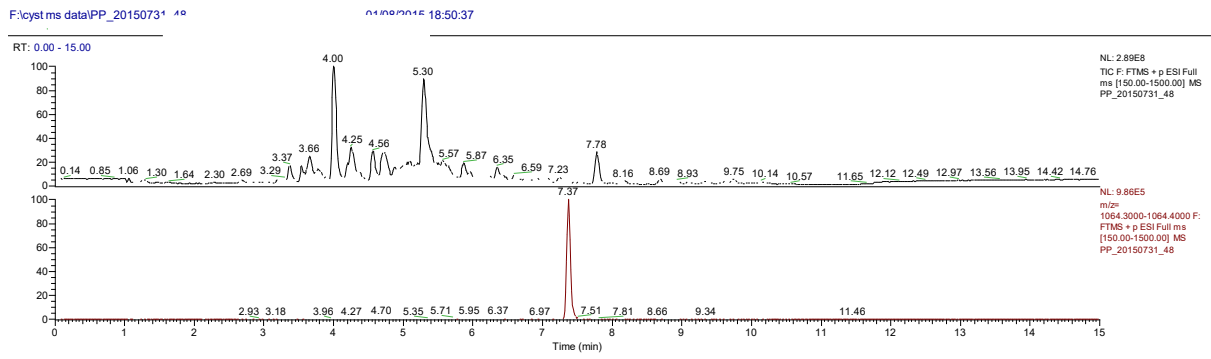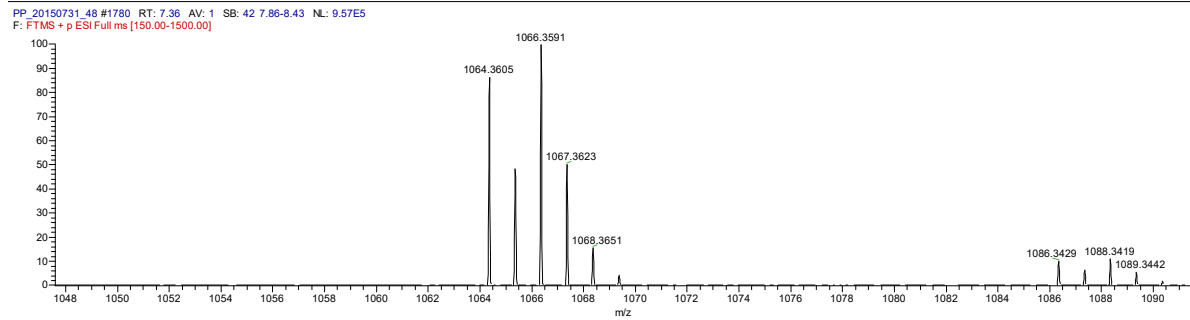

## MS2 spectrum and fragment assignment

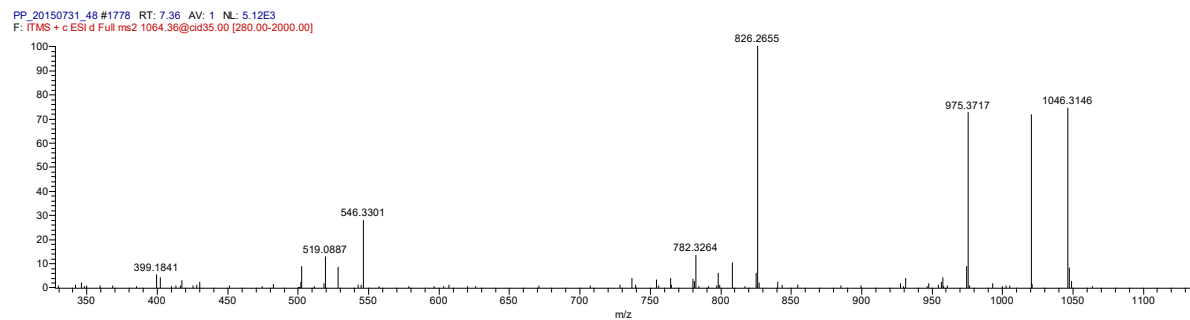



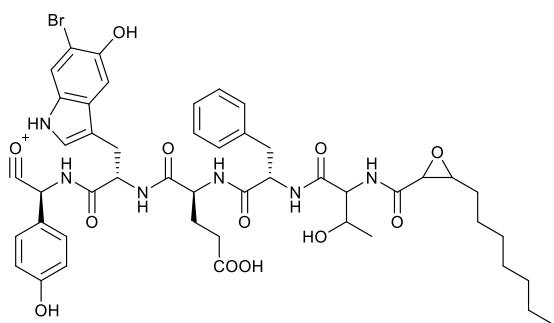

Chemical Formula:  $C_{47}H_{56}BrN_6O_{12}^+$   
Exact Mass: 975.3134

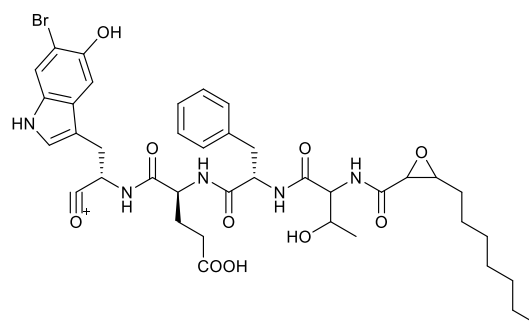

Chemical Formula:  $C_{39}H_{46}BrN_5O_{10}^+$   
Exact Mass: 826.2657

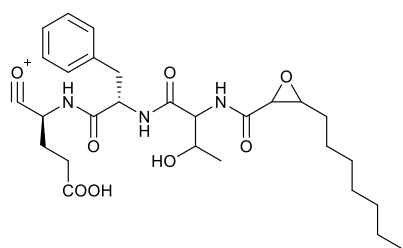

Chemical Formula:  $C_{28}H_{40}N_3O_8^+$   
Exact Mass: 546.2810

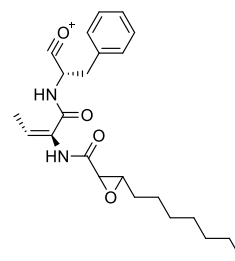

Chemical Formula:  $C_{23}H_{31}N_2O_4^+$   
Exact Mass: 399.2278

### (5BrW) Brominated cystargamide unhydroxylated

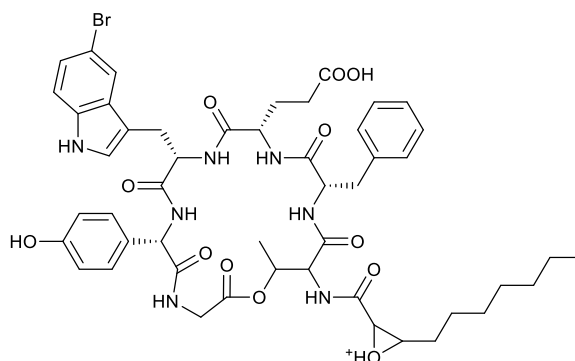

Chemical Formula:  $C_{49}H_{59}BrN_7O_{12}^+$   
Exact Mass: 1016.3400

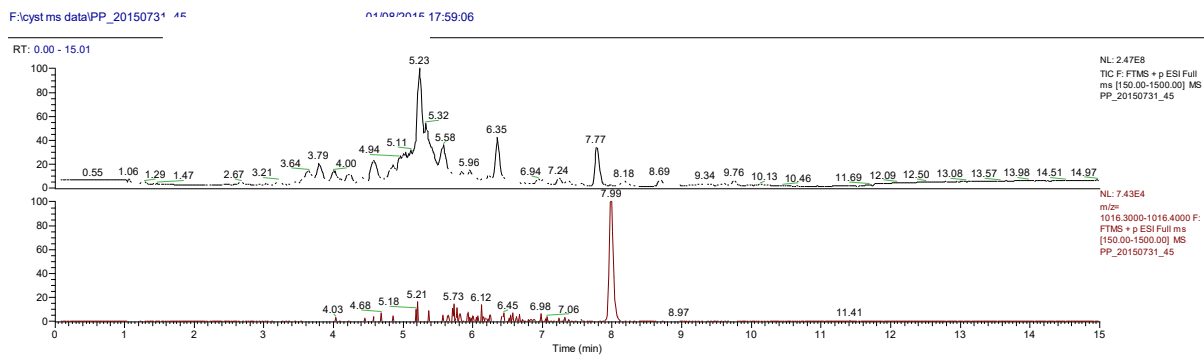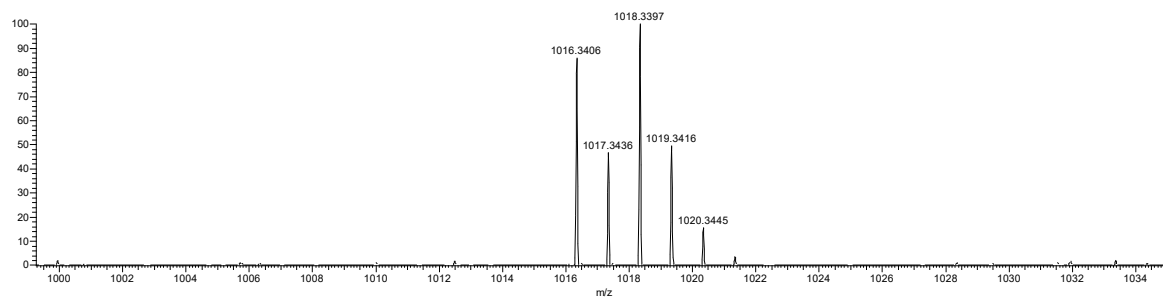

## MS2 spectrum and fragment assignment

PP\_20150731\_45 #1856 RT: 8.00 AV: 1 NL: 3.82E3  
F: ITMS + c ESI d Full ms2 1016.34@cid35.00 [285.00-2000.00]

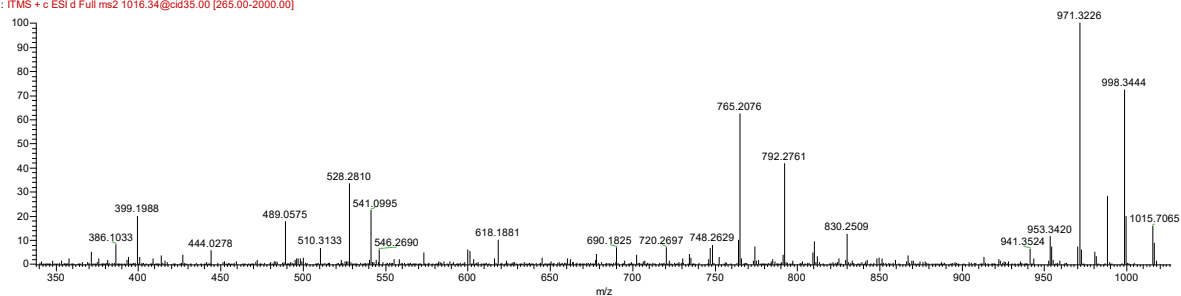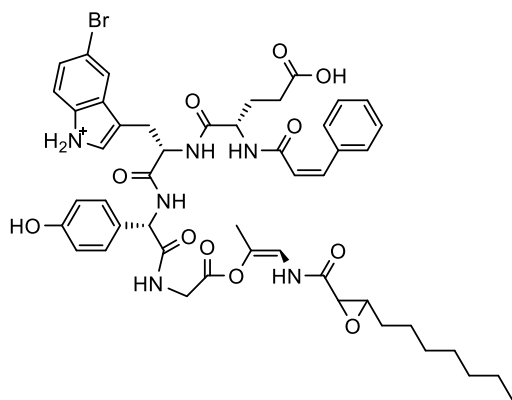

Chemical Formula:  $C_{48}H_{56}BrN_6O_{11}^+$   
Exact Mass: 971.3185

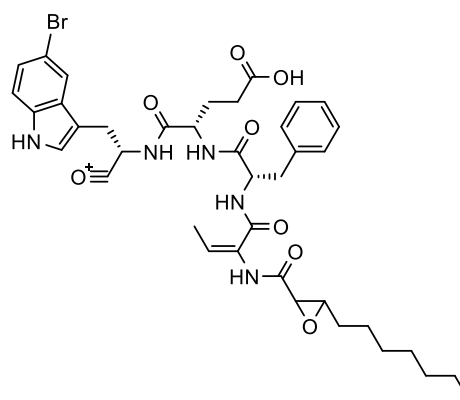

Chemical Formula:  $C_{39}H_{47}BrN_5O_8^+$   
Exact Mass: 792.2603

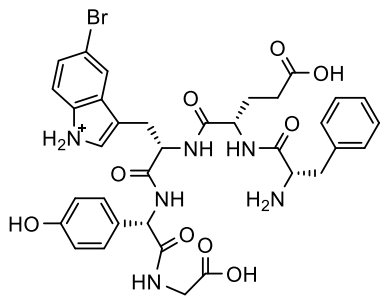

Chemical Formula:  $C_{35}H_{38}BrN_6O_9^+$   
Exact Mass: 765.1878

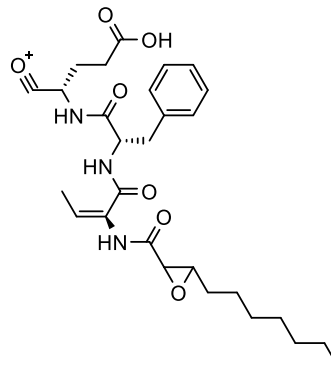

Chemical Formula:  $C_{28}H_{38}N_3O_7^+$   
Exact Mass: 528.2704

Chemical Formula:  $C_{23}H_{31}N_2O_4^+$   
Exact Mass: 399.2278

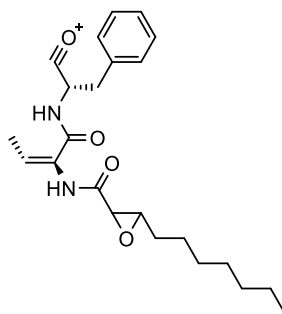

**(5BrW) Brominated linear cystargamide[ALA] un hydroxylated**

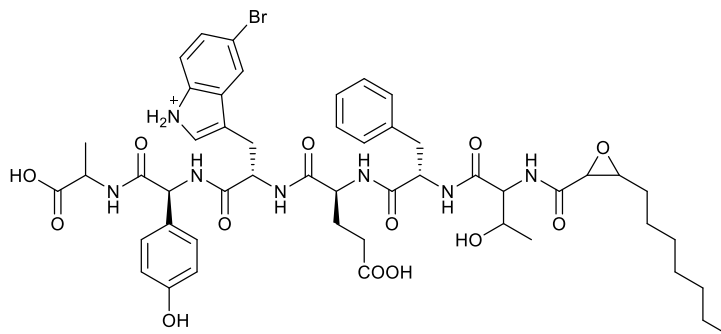

Chemical Formula:  $C_{50}H_{63}BrN_7O_{13}^+$   
Exact Mass: 1048.3662

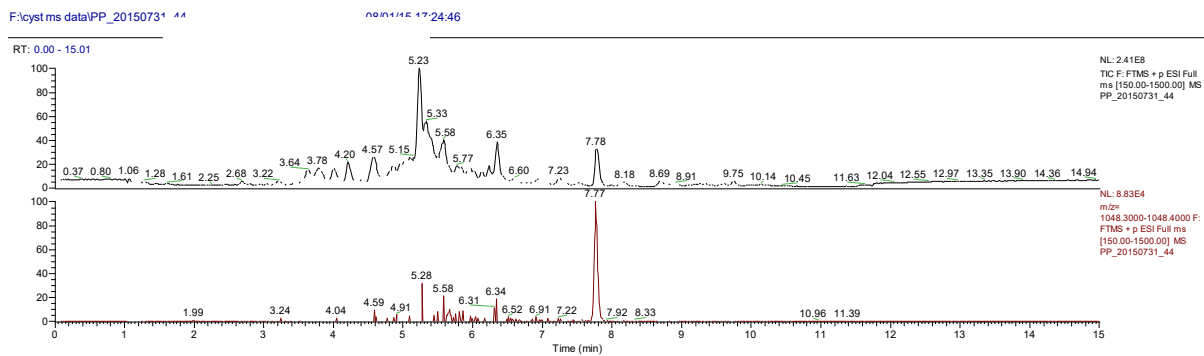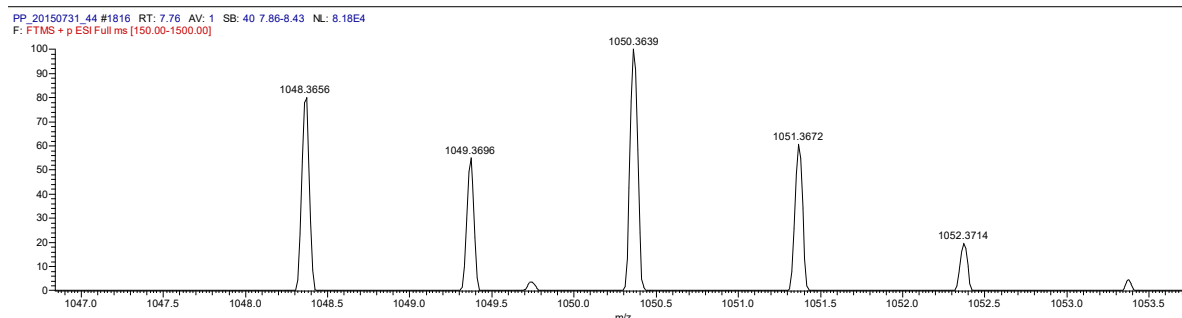

## (7-BrW) Brominated cystargamide

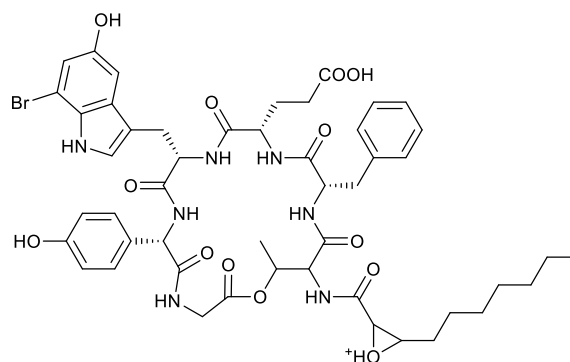

Chemical Formula:  $C_{49}H_{59}BrN_7O_{13}^+$   
Exact Mass: 1032.3349

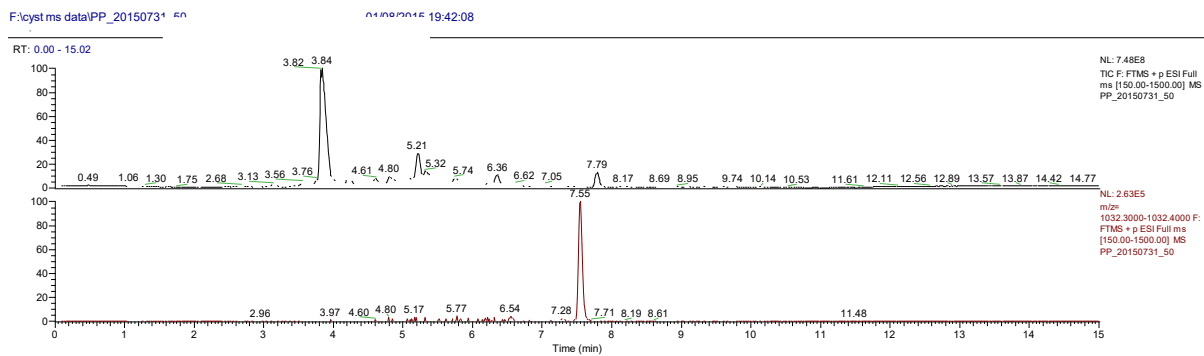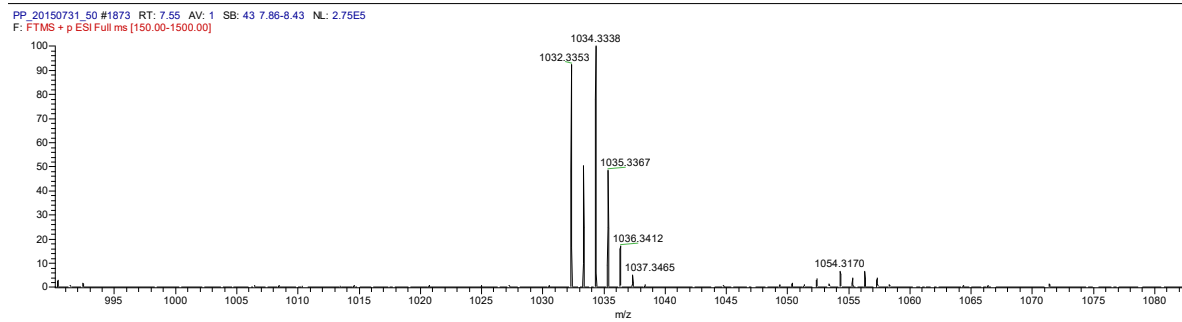

### MS2 spectrum and fragment assignment

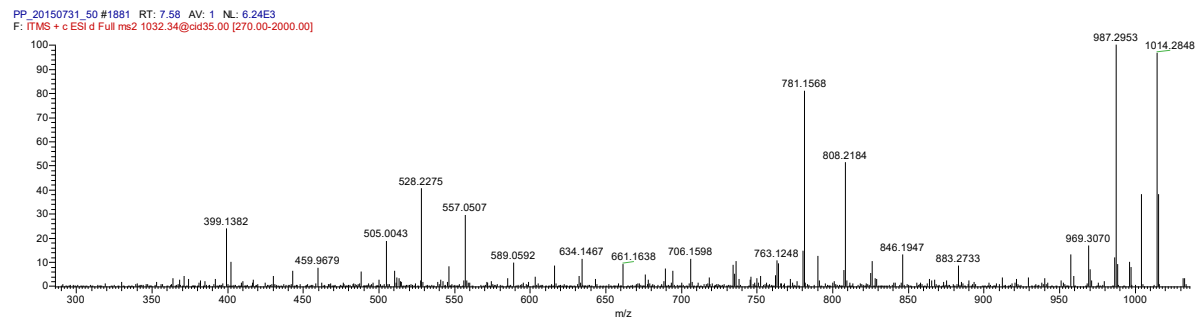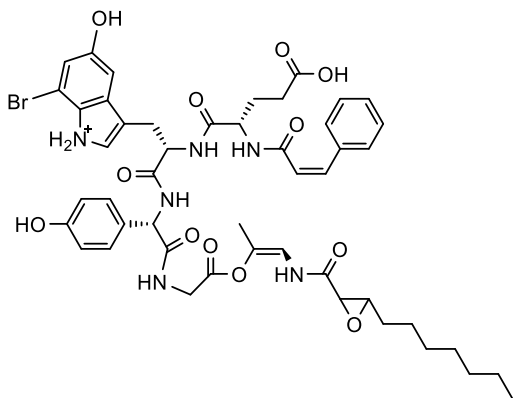

Chemical Formula:  $C_{48}H_{56}BrN_6O_{12}^+$   
 Exact Mass: 987.3134

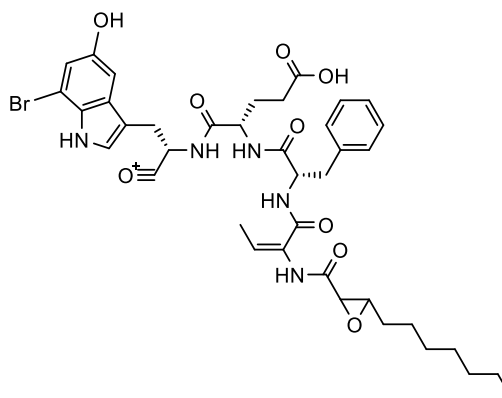

Chemical Formula:  $C_{39}H_{47}BrN_5O_9^+$   
 Exact Mass: 808.2552

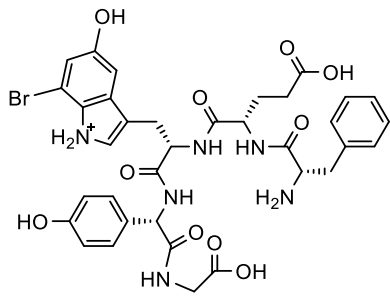

Chemical Formula:  $C_{35}H_{38}BrN_6O_{10}^+$   
Exact Mass: 781.1827

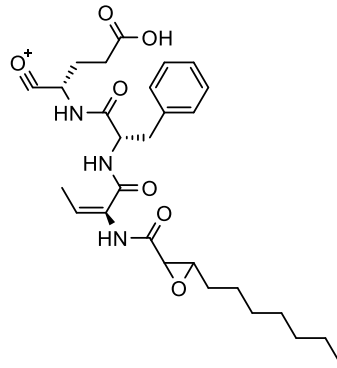

Chemical Formula:  $C_{28}H_{38}N_3O_7^+$   
Exact Mass: 528.2704

Chemical Formula:  $C_{23}H_{31}N_2O_4^+$   
Exact Mass: 399.2278

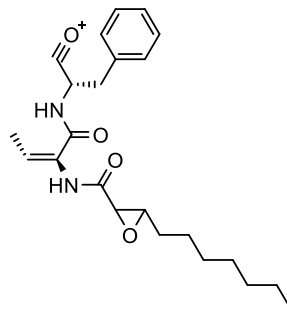

**(7BrW) Brominated linear cystargamide[ALA] un hydroxylated**

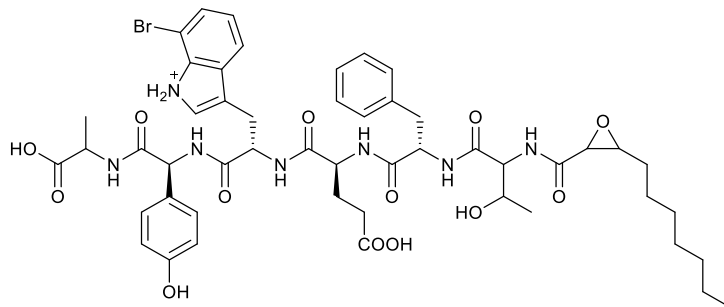

Chemical Formula:  $C_{50}H_{63}BrN_7O_{13}^+$   
Exact Mass: 1048.3662

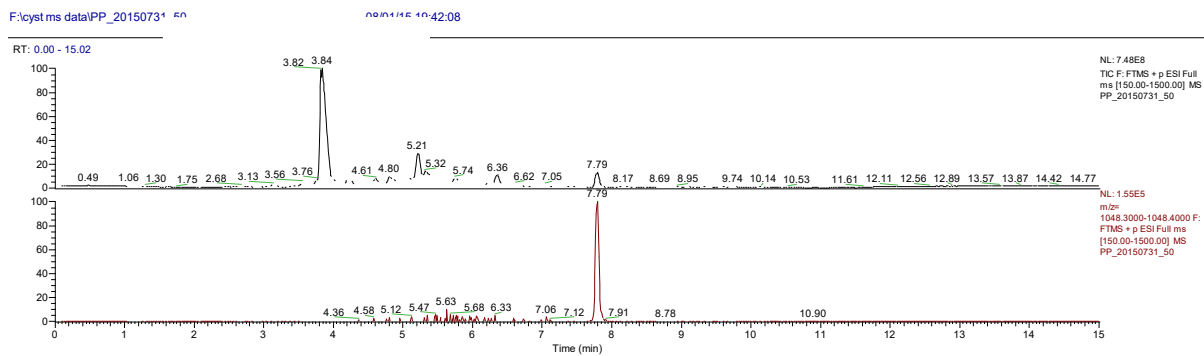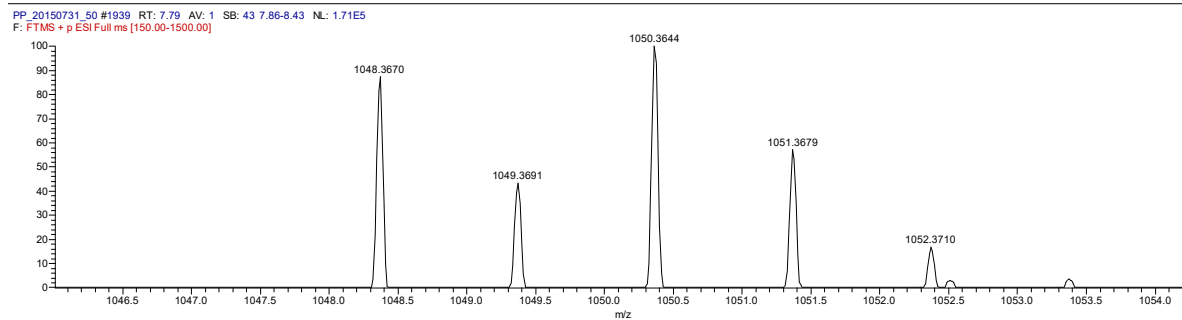

### (6BrW) Brominated linear cystargamide[ALA]

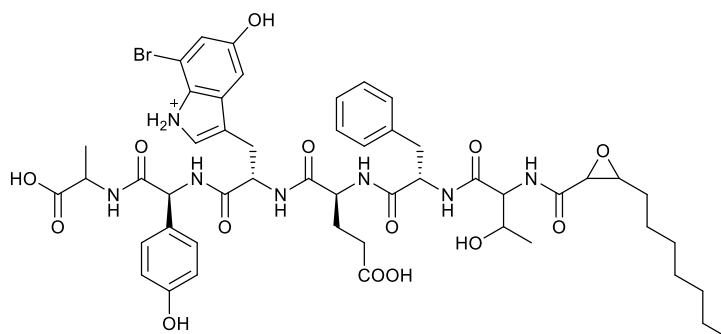

Chemical Formula:  $C_{50}H_{63}BrN_7O_{14}^+$   
Exact Mass: 1064.3611

RT: 0.00 - 15.02

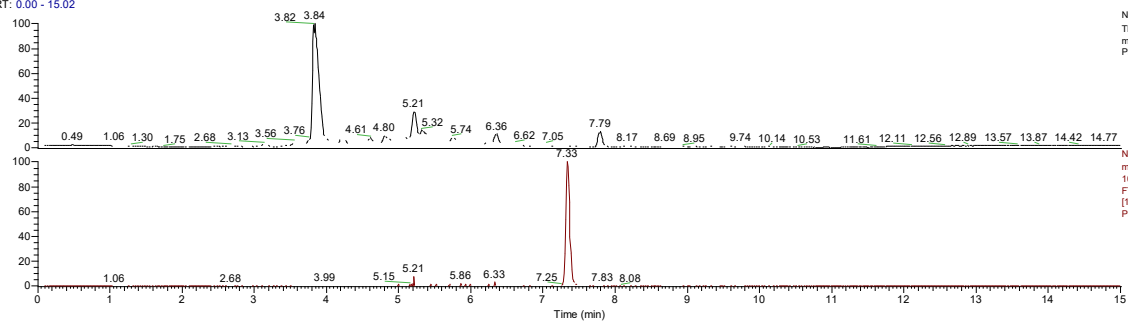

NL: 7.48E8  
 TIC: F: FTMS + p ESI Full  
 ms [150.00-1500.00] MS  
 PP\_20150731\_50

NL: 5.33E5  
 m/z:  
 1064.3000-1064.4000 F:  
 FTMS + p ESI Full ms  
 [150.00-1500.00] MS  
 PP\_20150731\_50

PP\_20150731\_50 #1825 RT: 7.36 AV: 1 SB: 43 7.86-8.43 NL: 3.86E5  
 F: FTMS + p ESI Full ms [150.00-1500.00]

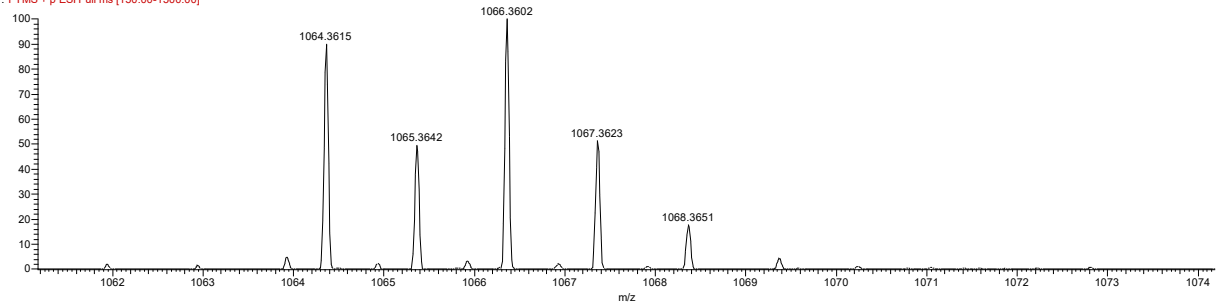

### MS2 spectrum and fragment assignment

PP\_20150731\_50 #1818 RT: 7.34 AV: 1 NL: 4.00E3  
 F: ITMS + c ESI d Full ms2 1064.36@cid35.00 [280.00-2000.00]

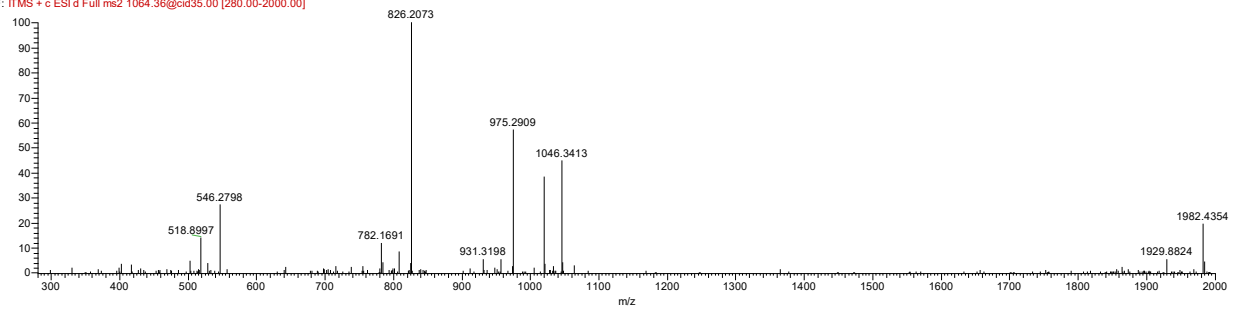



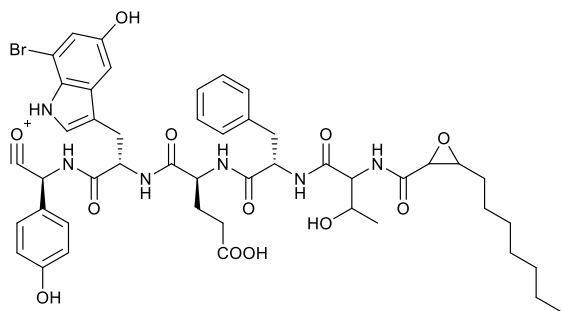

Chemical Formula:  $C_{47}H_{56}BrN_6O_{12}^+$   
Exact Mass: 975.3134

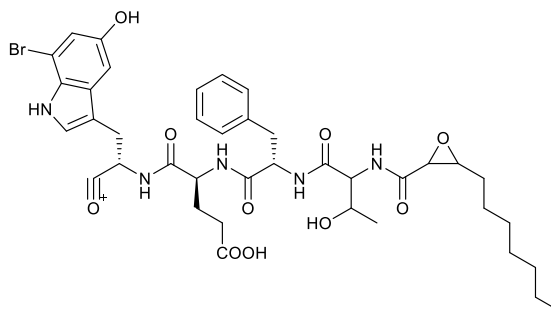

Chemical Formula:  $C_{39}H_{49}BrN_5O_{10}^+$   
Exact Mass: 826.2657

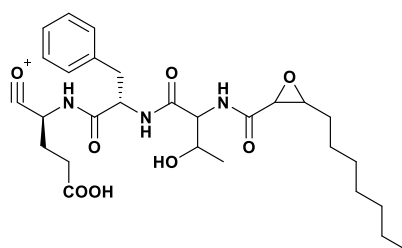

Chemical Formula:  $C_{28}H_{40}N_3O_8^+$   
Exact Mass: 546.2810

**(5CIW) Chlorinated linear cystargamide no hydroxylated**

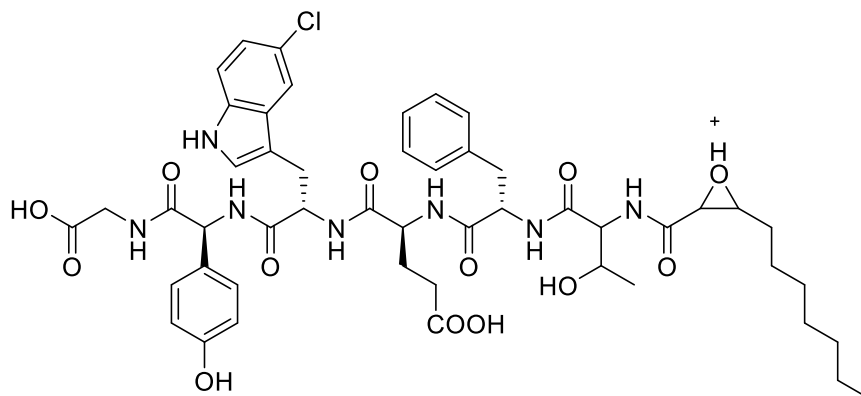

Chemical Formula:  $C_{49}H_{61}ClN_7O_{13}^+$   
Exact Mass: 990.4010

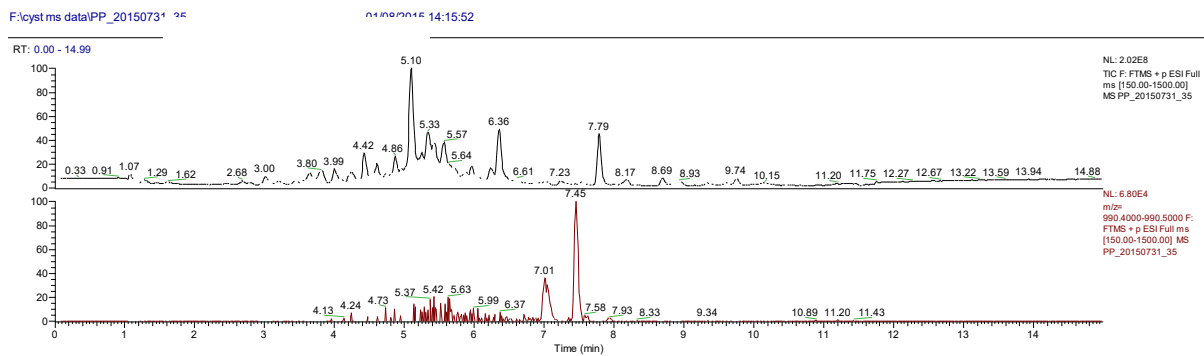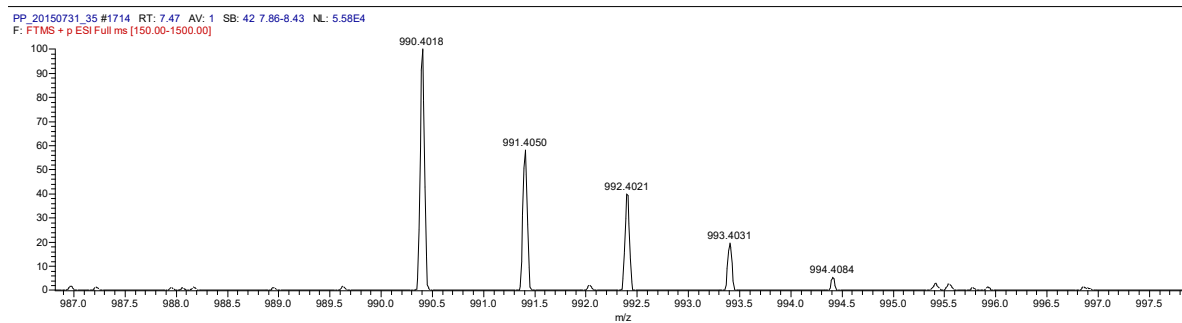

## MS2 spectrum and fragment assignment

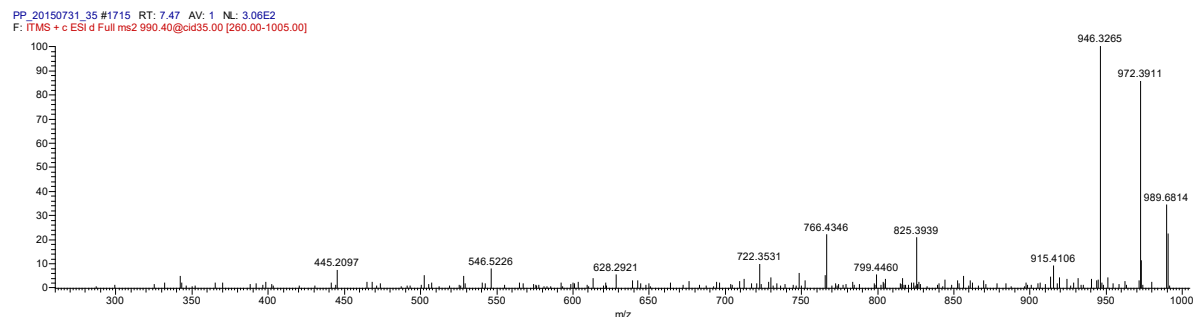

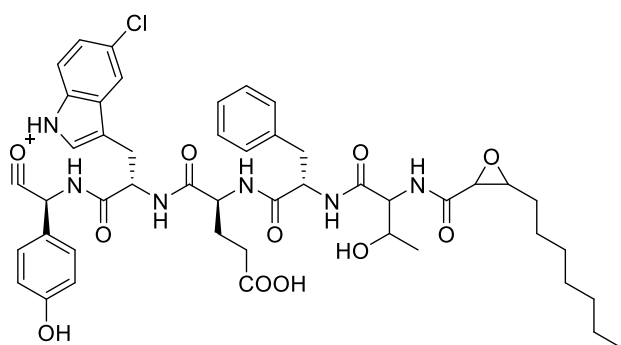

Chemical Formula:  $C_{47}H_{56}ClN_6O_{11}^+$   
 Exact Mass: 915.3690

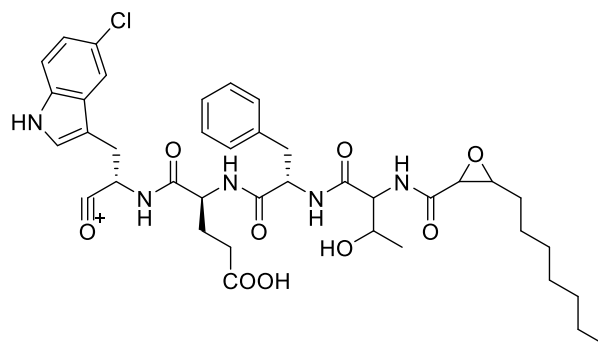

Chemical Formula:  $C_{39}H_{49}ClN_5O_9^+$   
 Exact Mass: 766.3213

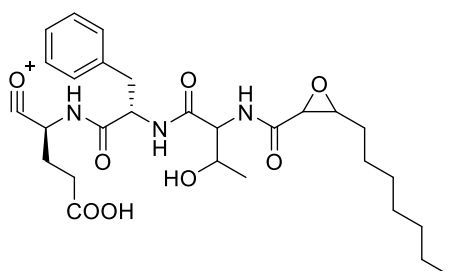

Chemical Formula:  $C_{28}H_{40}N_3O_8^+$   
 Exact Mass: 546.2810

**(5CIW) Chlorinated linear cystargamide[ALA] unhydroxylated**

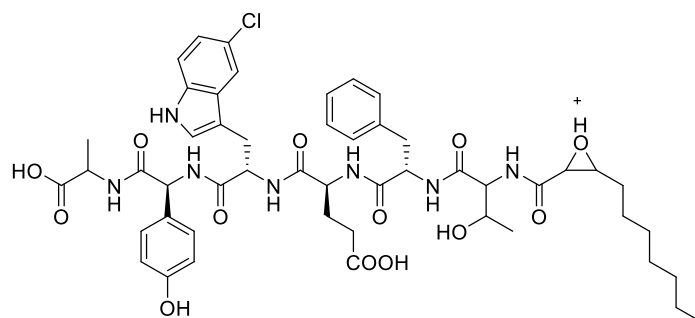

Chemical Formula:  $C_{50}H_{63}ClN_7O_{13}^+$   
 Exact Mass: 1004.4167

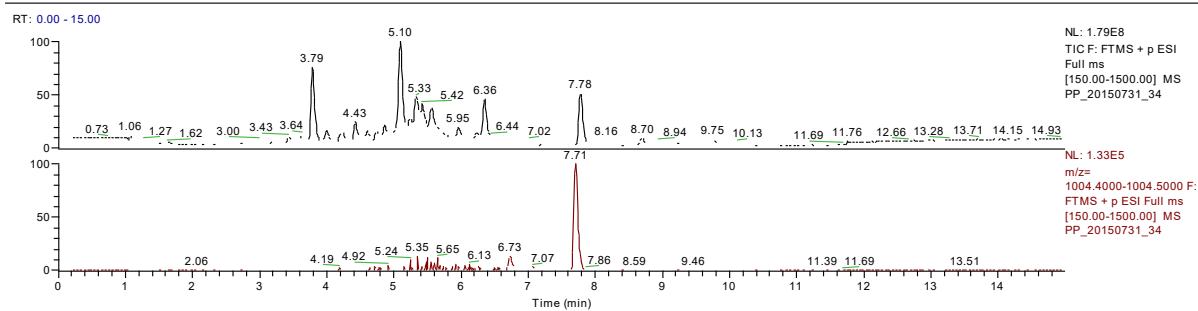

PP\_20150731\_34 #1753 RT: 7.68 AV: 1 SB: 41 7.86-8.43 NL: 6.84E4  
F: FTMS + p ESI Full ms [150.00-1500.00]

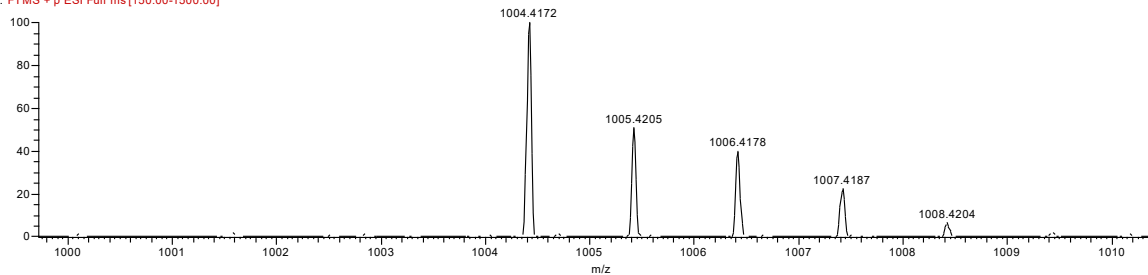

## MS2 spectrum and fragment assignment

PP\_20150731\_34 #1754 RT: 7.69 AV: 1 NL: 3.51E2  
F: ITMS + c ESI d Full ms2 1004.42@cid35.00 [265.00-1015.00]

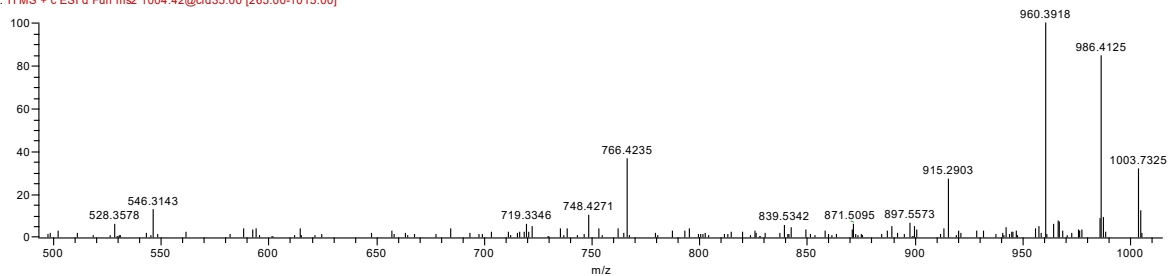

## (6CIW) Chlorinated cystargamide un hydroxylated

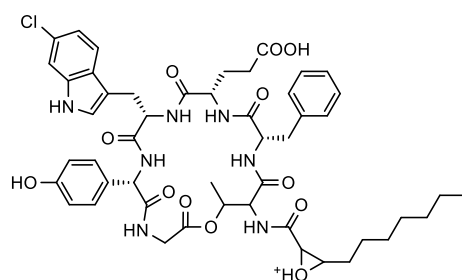

Chemical Formula:  $C_{49}H_{59}ClN_7O_{12}^+$   
Exact Mass: 972.3905

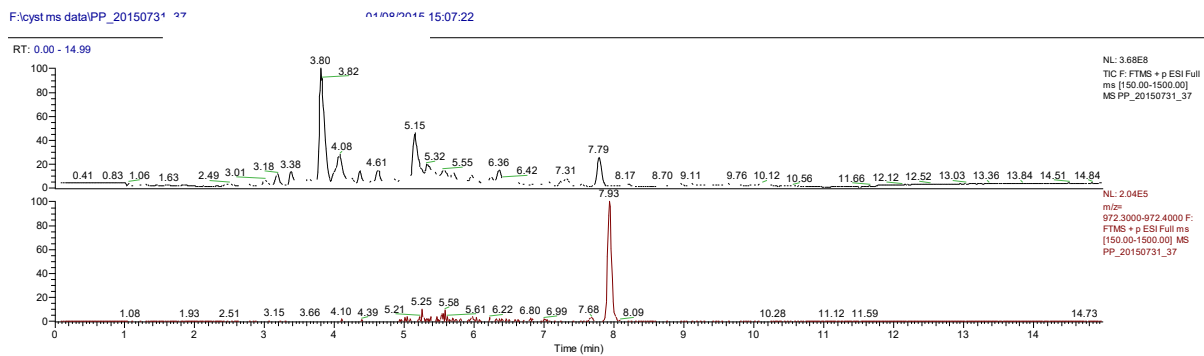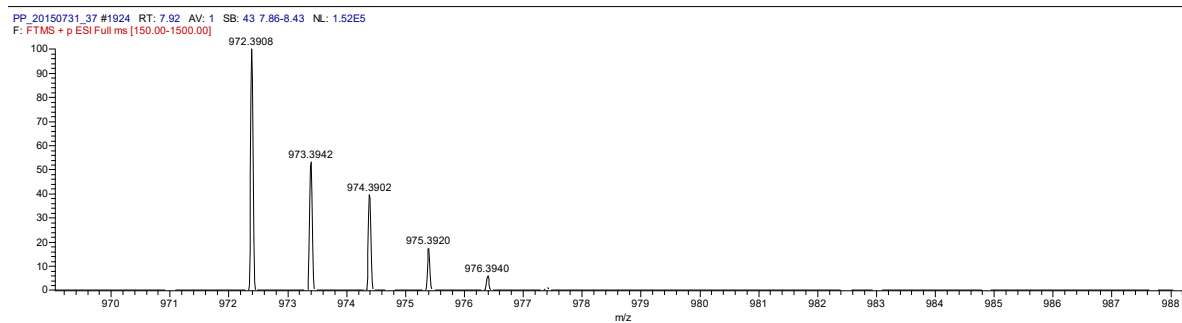

## MS2 spectrum and fragment assignment

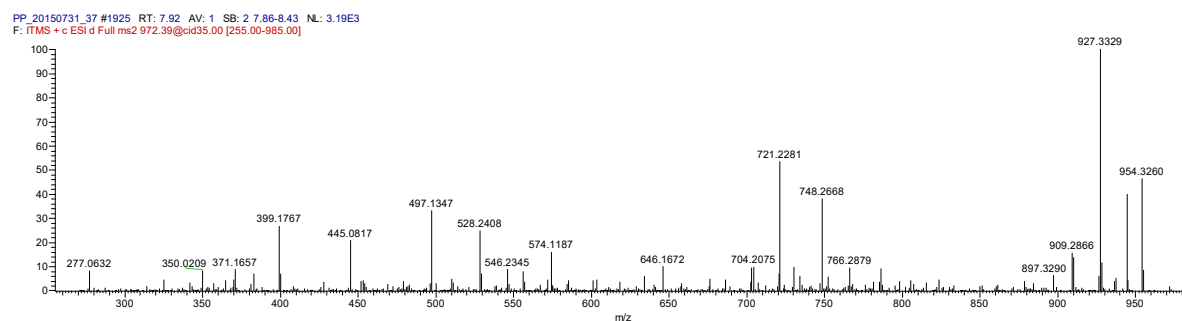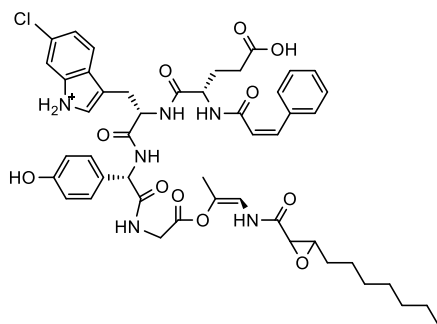

Chemical Formula:  $C_{48}H_{56}ClN_6O_{11}^+$   
Exact Mass: 927.3690

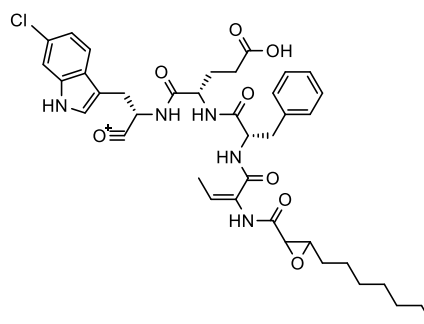

Chemical Formula:  $C_{39}H_{47}ClN_5O_8^+$   
Exact Mass: 748.3108

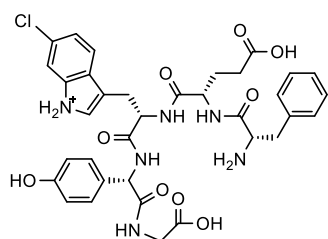

Chemical Formula:  $C_{35}H_{38}ClN_6O_9^+$   
 Exact Mass: 721.2383

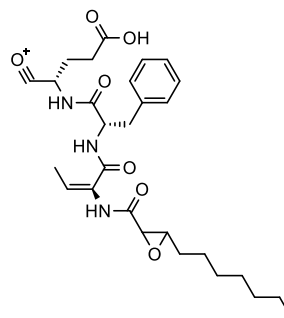

Chemical Formula:  $C_{28}H_{38}N_3O_7^+$   
 Exact Mass: 528.2704

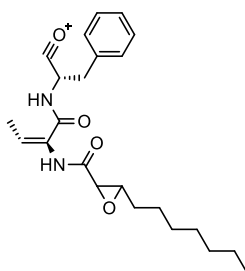

Chemical Formula:  $C_{23}H_{31}N_2O_4^+$   
 Exact Mass: 399.2278

**(6CIW) Chlorinated linear cystargamide un hydroxylated**

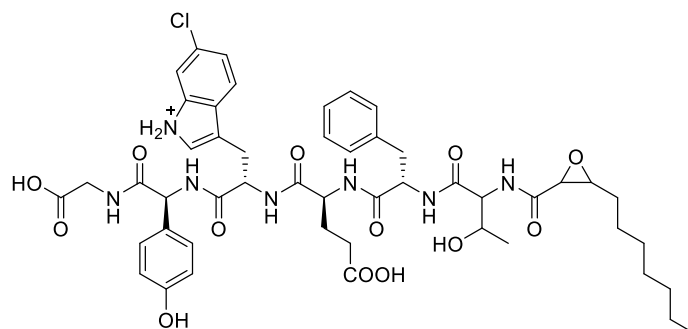

Chemical Formula:  $C_{49}H_{61}ClN_7O_{13}^+$   
 Exact Mass: 990.4010

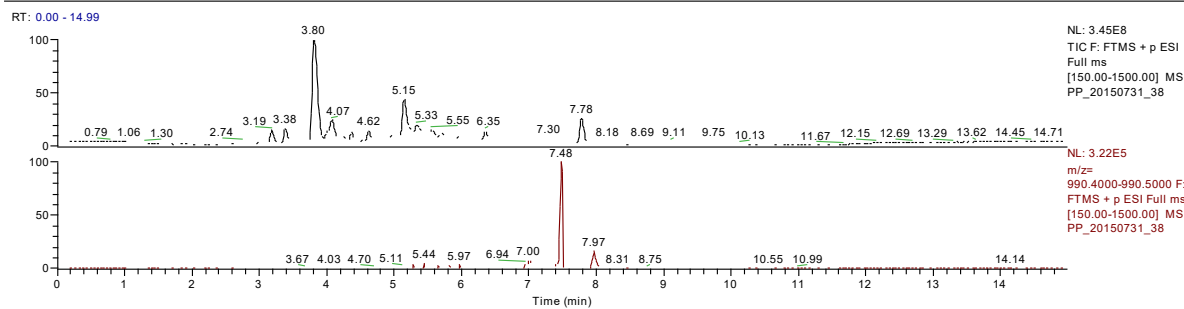

PP\_20150731\_38 #1813 RT: 7.47 AV: 1 SB: 43 7.86-8.43 NL: 2.61E5  
F: FTMS + p ESI Full ms [150.00-1500.00]

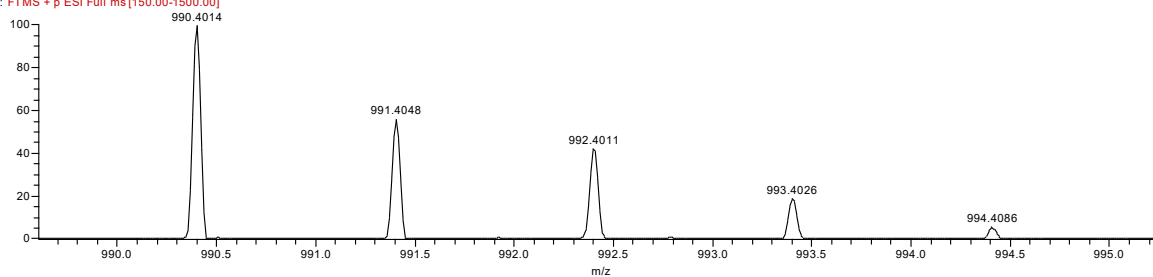

### MS2 spectrum and fragment assignment

PP\_20150731\_38 #1809 RT: 7.46 AV: 1 NL: 1.61E3  
F: ITMS + c ESI d Full ms2 990.40@cid35.00 [260.00-1005.00]

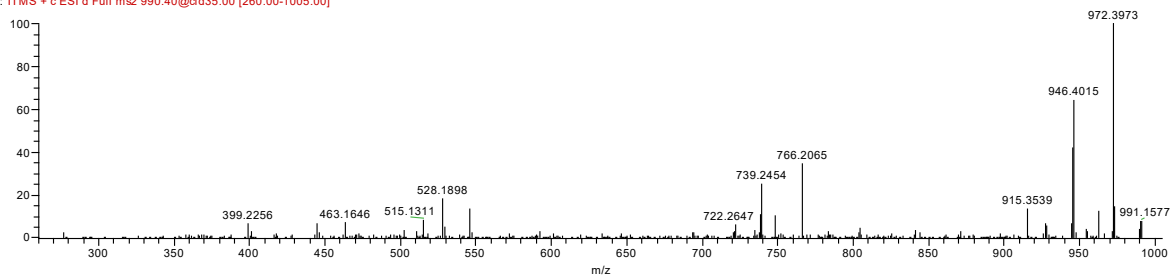

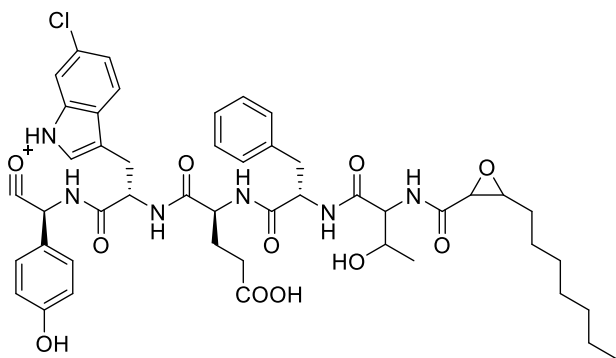

Chemical Formula:  $C_{47}H_{56}ClN_6O_{11}^+$   
Exact Mass: 915.3690

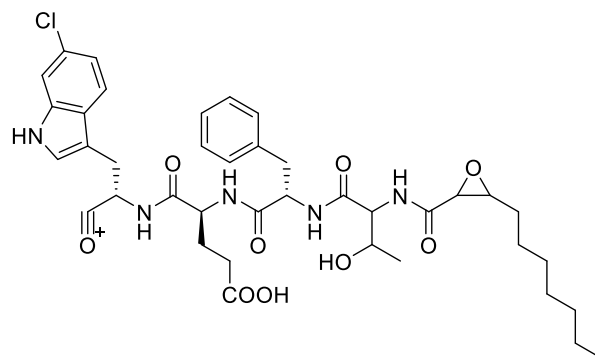

Chemical Formula:  $C_{39}H_{49}ClN_5O_9^+$   
Exact Mass: 766.3213

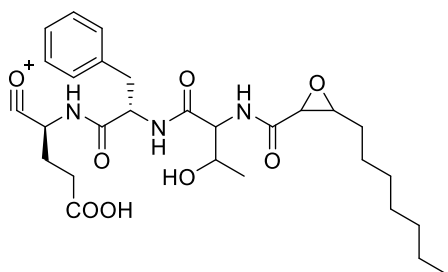

Chemical Formula:  $C_{28}H_{40}N_3O_8^+$   
Exact Mass: 546.2810

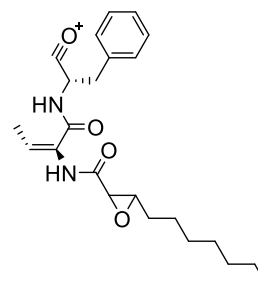

Chemical Formula:  $C_{23}H_{31}N_2O_4^+$   
Exact Mass: 399.2278

### (6CIW) Chlorinated cystargamide

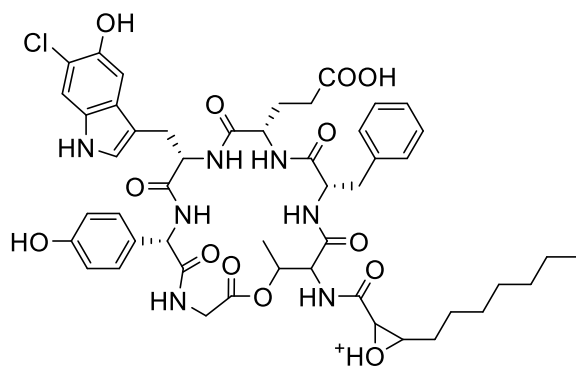

Chemical Formula:  $C_{49}H_{59}ClN_7O_{13}^+$   
Exact Mass: 988.3854



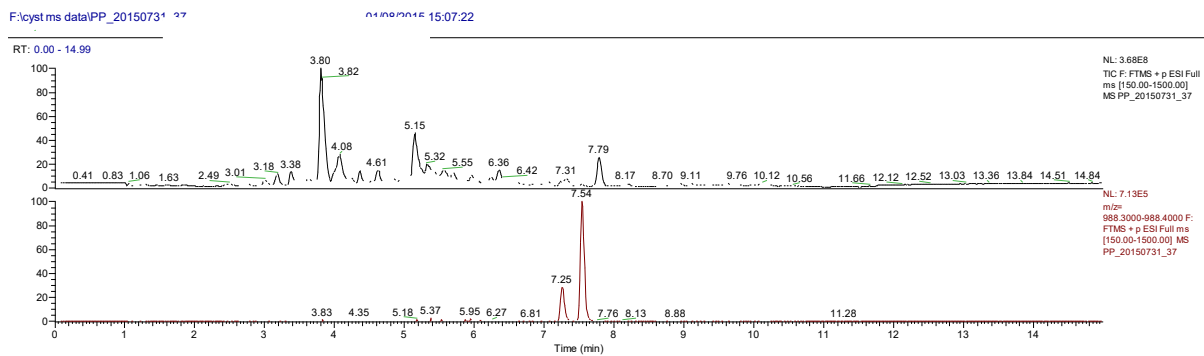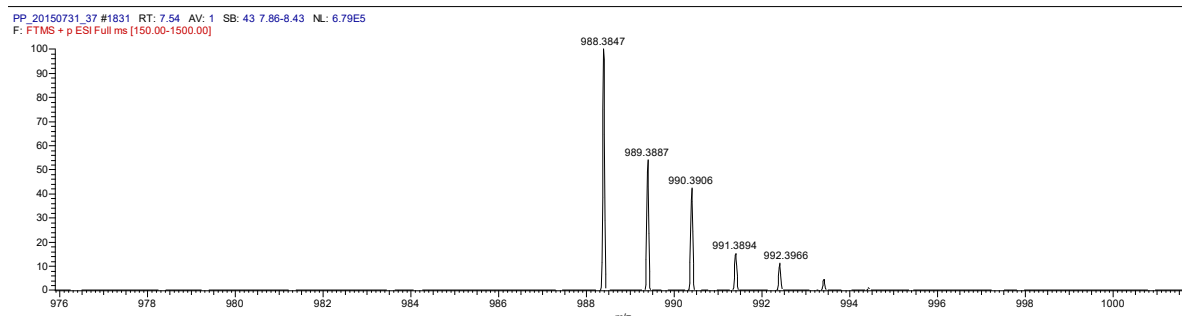

## (6CIW) Chlorinated linear cystargamide

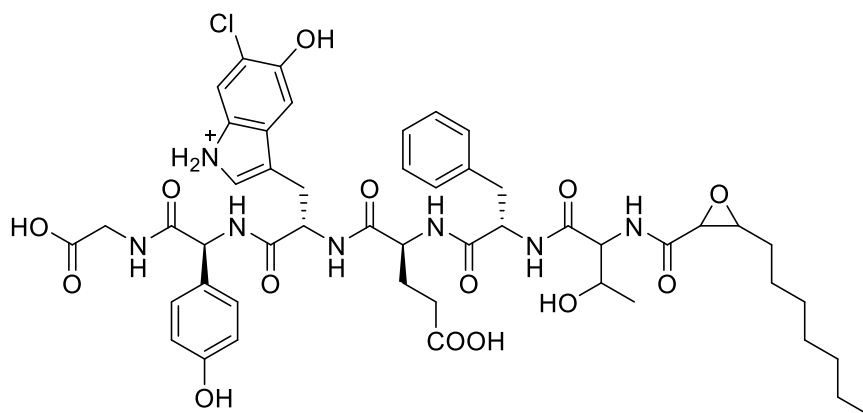

Chemical Formula:  $C_{49}H_{61}ClN_7O_{14}^+$   
Exact Mass: 1006.3960

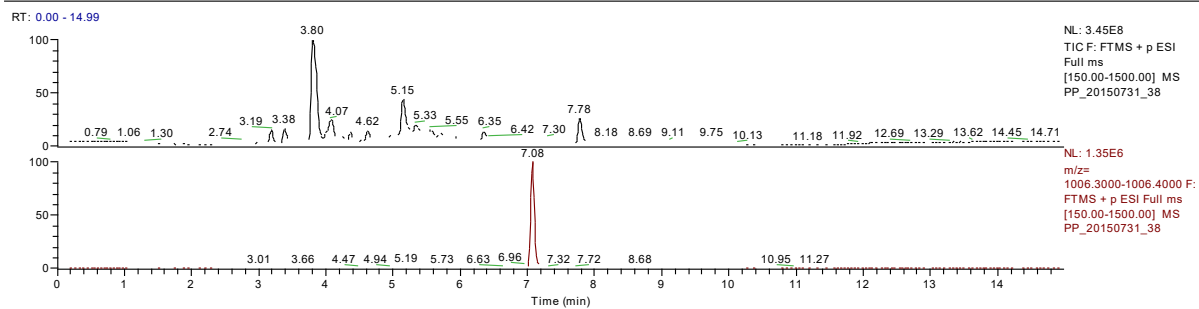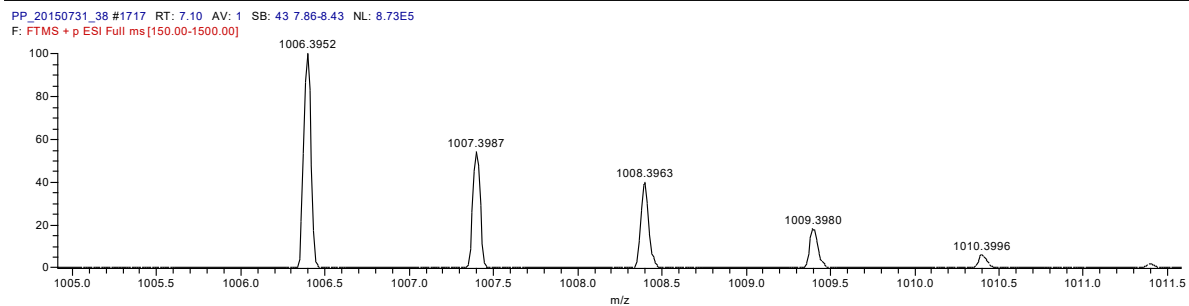

### MS2 spectrum and fragment assignment

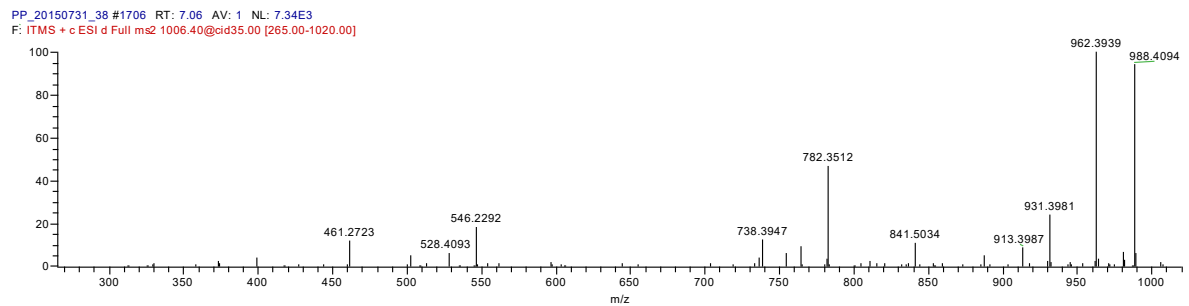

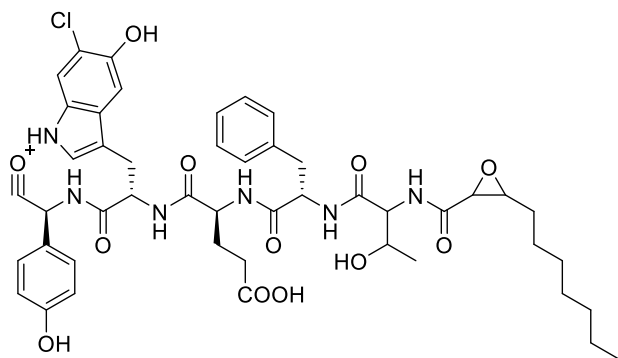

Chemical Formula:  $C_{47}H_{56}ClN_6O_{12}^+$   
Exact Mass: 931.3639

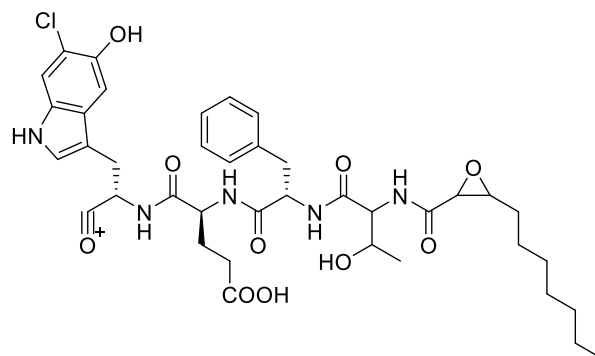

Chemical Formula:  $C_{39}H_{49}ClN_5O_{10}^+$   
Exact Mass: 782.3162



Chemical Formula:  $C_{28}H_{40}N_3O_8^+$   
Exact Mass: 546.2810



Chemical Formula:  $C_{23}H_{31}N_2O_4^+$   
Exact Mass: 399.2278

**(6CIW) Chlorinated linear cystargamide[ALA] un hydroxylated**

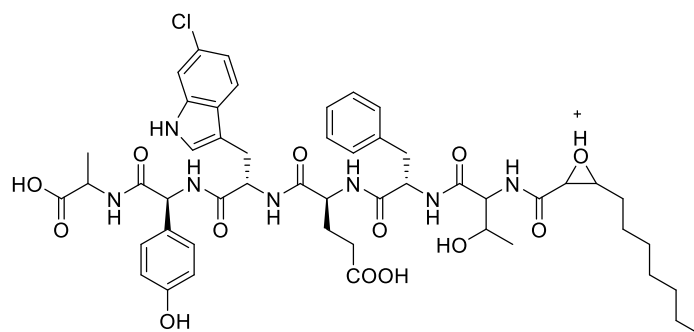

Chemical Formula:  $C_{50}H_{63}ClN_7O_{13}^+$   
Exact Mass: 1004.4167

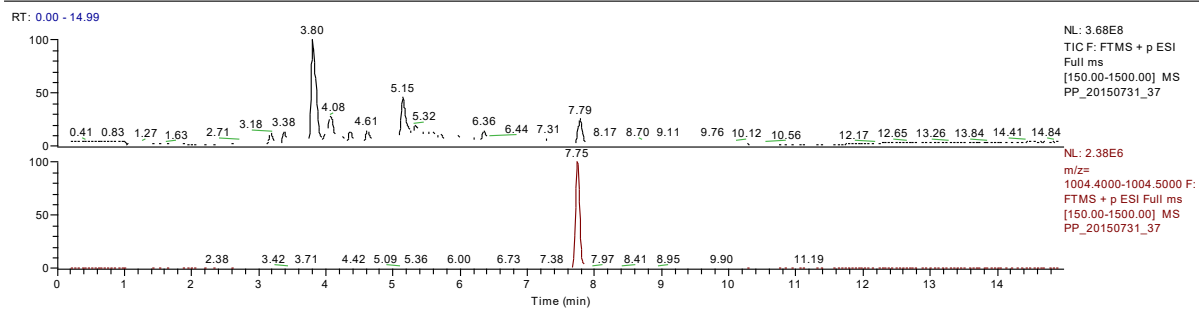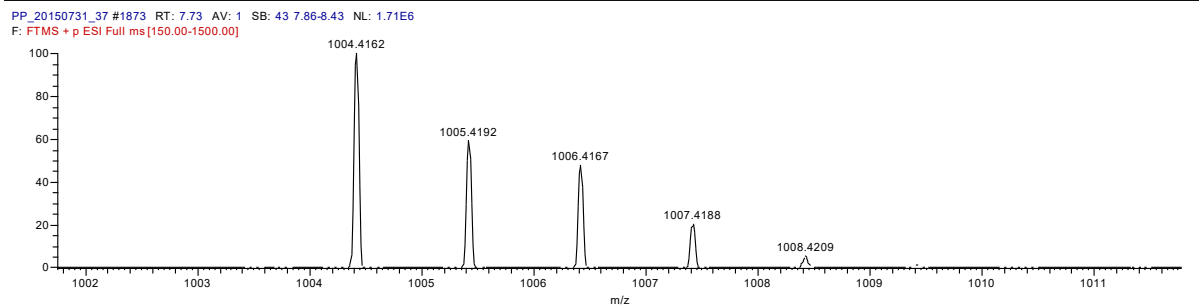

### MS2 spectrum and fragment assignment

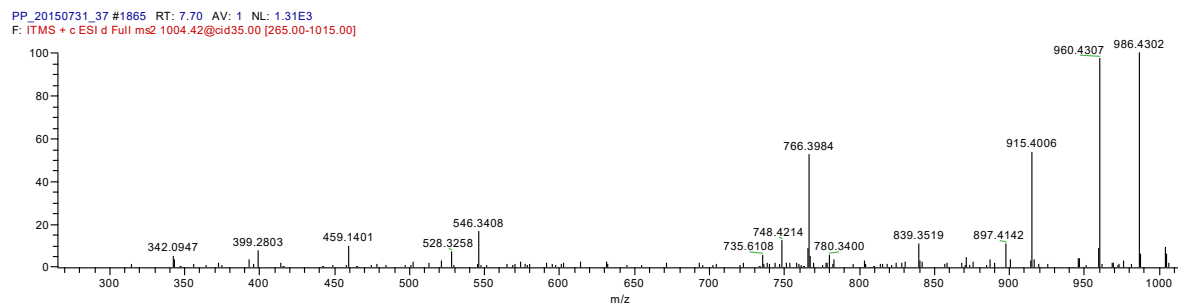

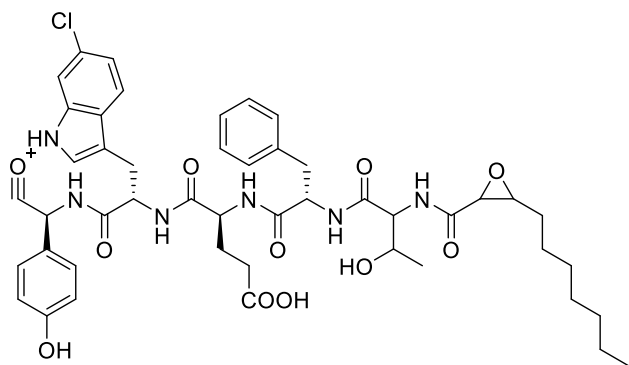

Chemical Formula:  $C_{47}H_{56}ClN_6O_{11}^+$   
Exact Mass: 915.3690

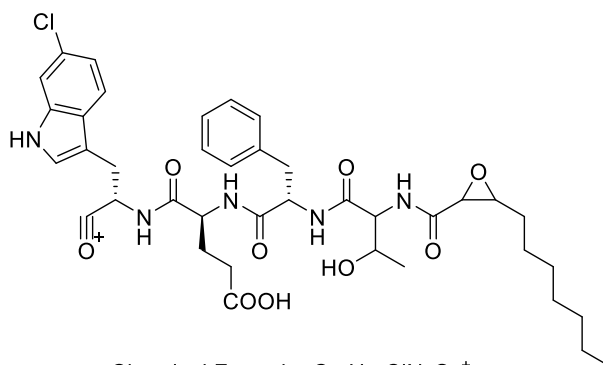

Chemical Formula:  $C_{39}H_{49}ClN_5O_9^+$   
Exact Mass: 766.3213

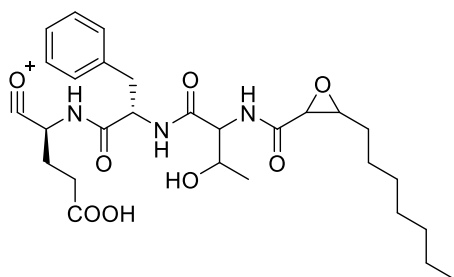

Chemical Formula:  $C_{28}H_{40}N_3O_8^+$   
Exact Mass: 546.2810

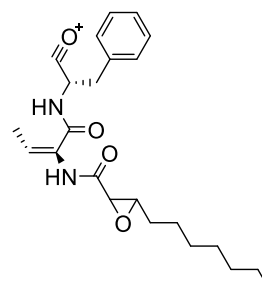

Chemical Formula:  $C_{23}H_{31}N_2O_4^+$   
Exact Mass: 399.2278

**(6CIW)-Chlorinated linear cystargamide[ALA]**

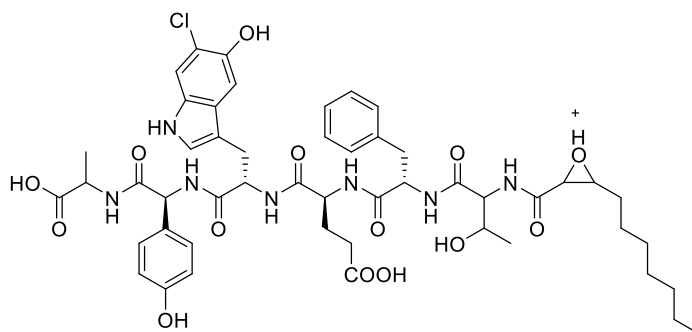

Chemical Formula:  $C_{50}H_{63}ClN_7O_{14}^+$   
Exact Mass: 1020.4116

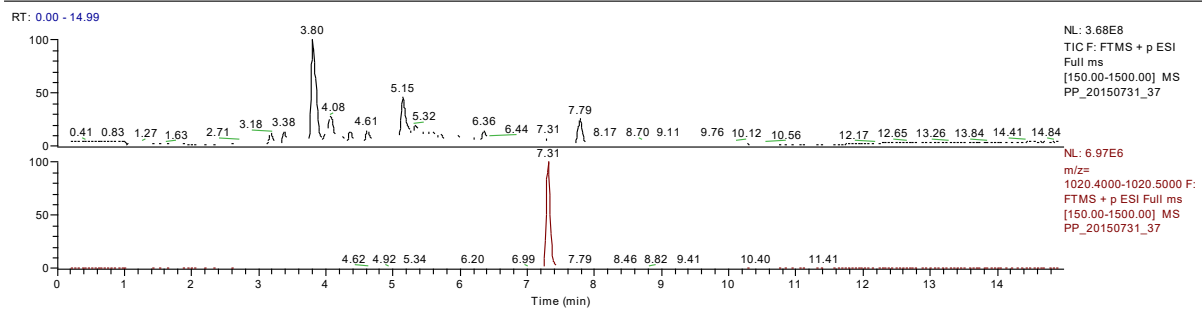

PP\_20150731\_37 #1774 RT: 7.31 AV: 1 SB: 43 7.86-8.43 NL: 6.76E6  
 F: FTMS + p ESI Full ms [150.00-1500.00]

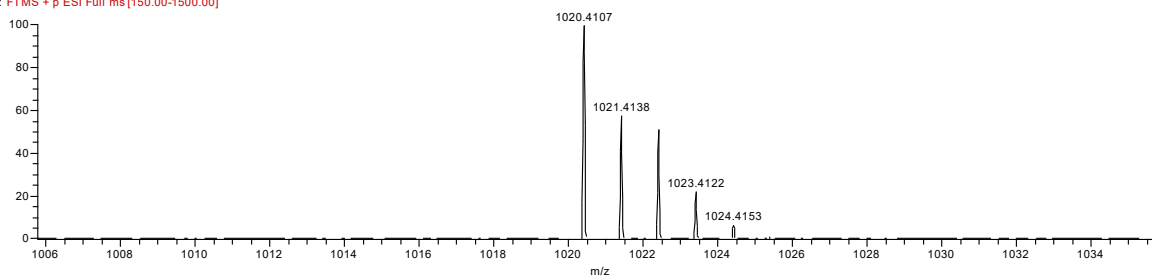

PP\_20150731\_37 #1760 RT: 7.27 AV: 1 NL: 6.44E3  
 F: ITMS + c ESI d Full ms2 1020.41@cid35.00 [270.00-1035.00]

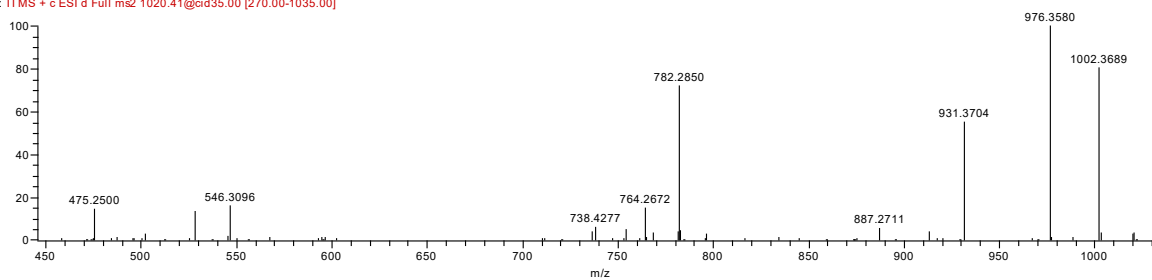

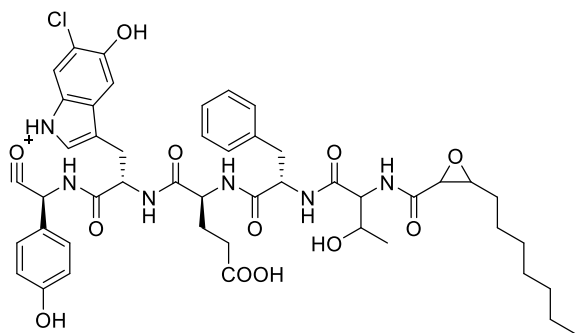

Chemical Formula:  $C_{47}H_{56}ClN_6O_{12}^+$   
Exact Mass: 931.3639

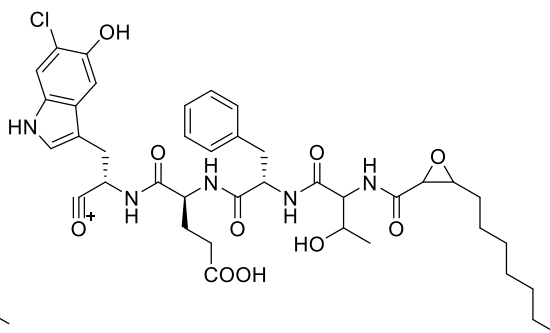

Chemical Formula:  $C_{39}H_{49}ClN_5O_{10}^+$   
Exact Mass: 782.3162

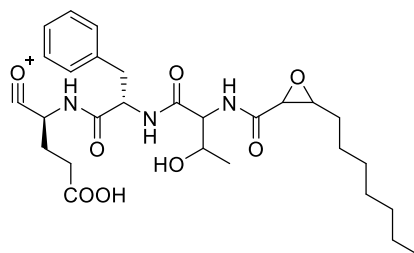

Chemical Formula:  $C_{28}H_{40}N_3O_8^+$   
Exact Mass: 546.2810

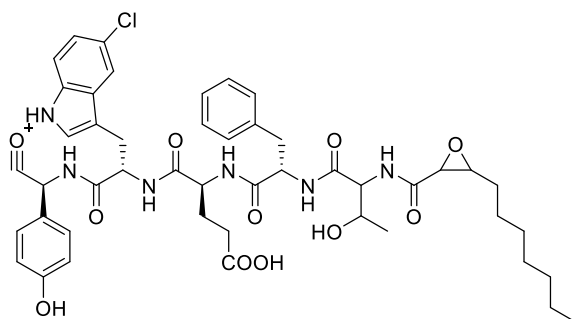

Chemical Formula:  $C_{47}H_{56}ClN_6O_{11}^+$   
Exact Mass: 915.3690

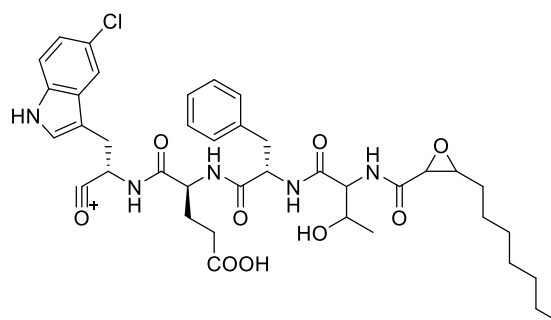

Chemical Formula:  $C_{39}H_{49}ClN_5O_9^+$   
Exact Mass: 766.3213

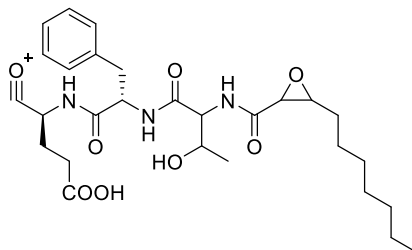

Chemical Formula:  $C_{28}H_{40}N_3O_8^+$   
Exact Mass: 546.2810

# (7CIW) Chlorinated cystargamide unhydroxylated

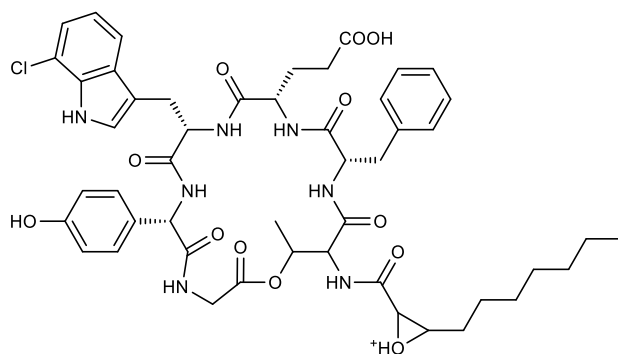

Chemical Formula:  $C_{49}H_{59}ClN_7O_{12}^+$   
Exact Mass: 972.3905

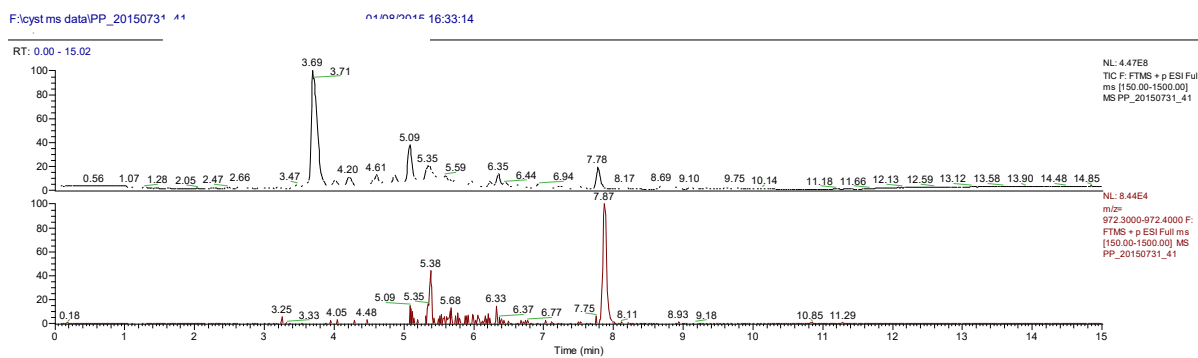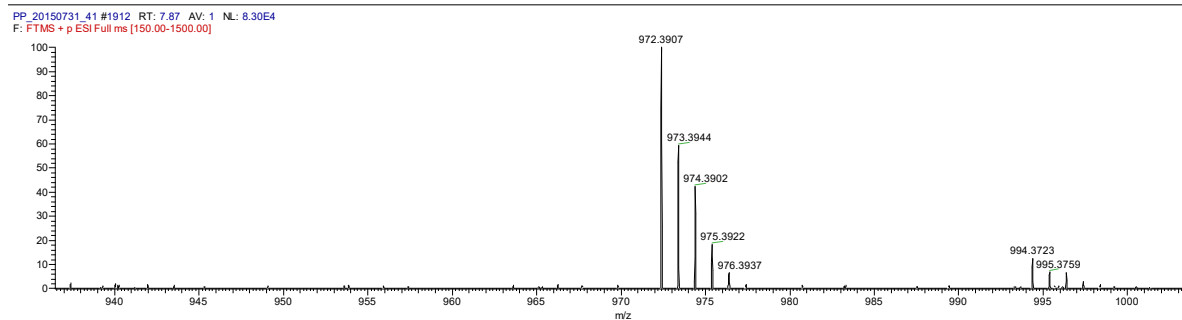

## MS2 spectrum and fragment assignment

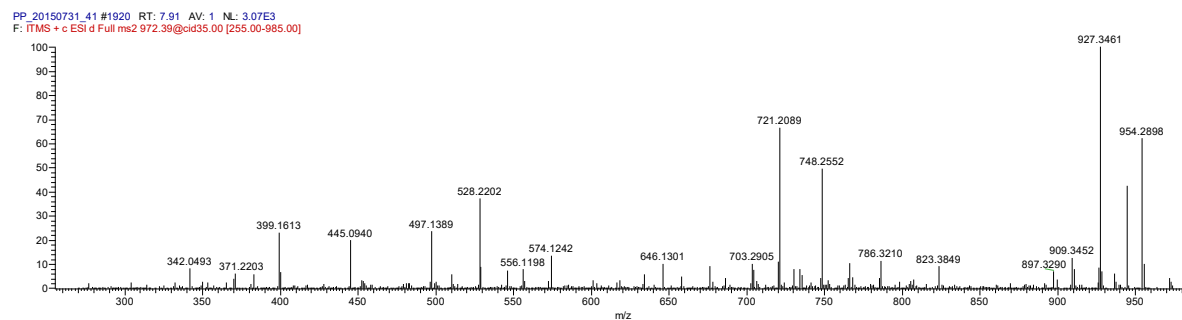



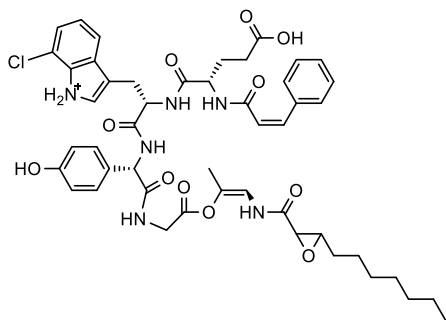

Chemical Formula:  $C_{48}H_{56}ClN_6O_{11}^+$   
Exact Mass: 927.3690

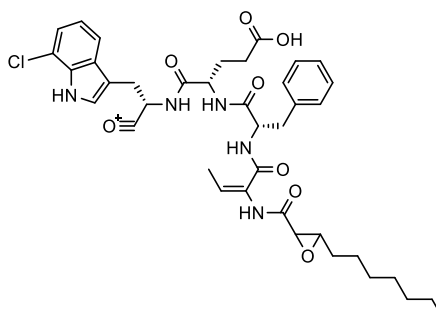

Chemical Formula:  $C_{39}H_{47}ClN_5O_8^+$   
Exact Mass: 748.3108

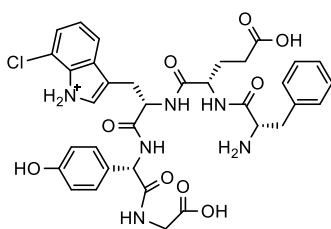

Chemical Formula:  $C_{35}H_{38}ClN_6O_9^+$   
Exact Mass: 721.2383

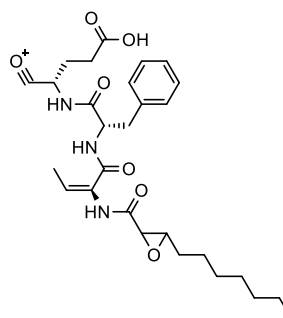

Chemical Formula:  $C_{28}H_{38}N_3O_7^+$   
Exact Mass: 528.2704

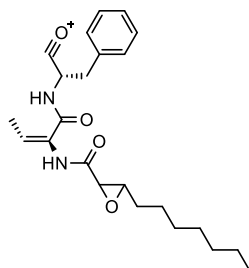

Chemical Formula:  $C_{23}H_{31}N_2O_4^+$   
Exact Mass: 399.2278

**(7CIW) Chlorinated linear cystargamide un hydroxylated**

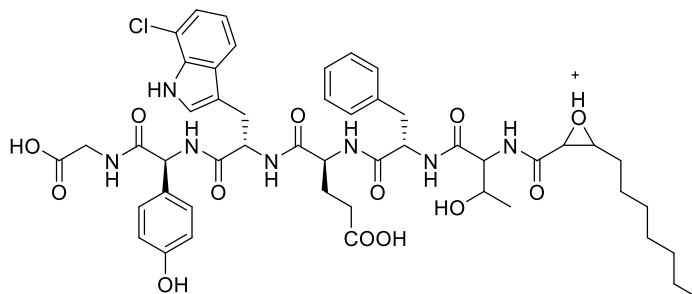

Chemical Formula:  $C_{49}H_{61}ClN_7O_{13}^+$   
Exact Mass: 990.4010

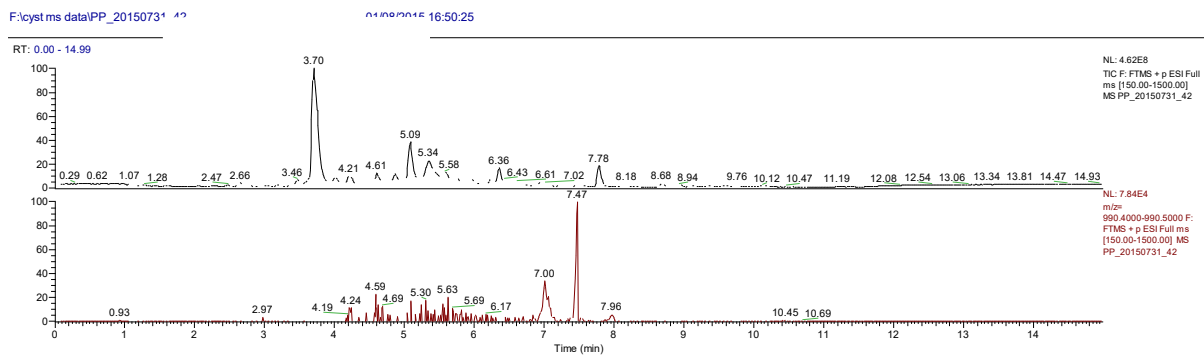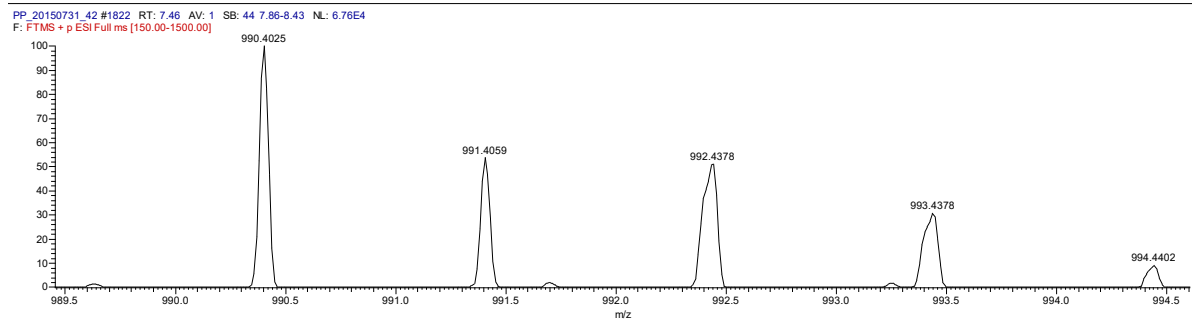

## MS2 spectrum and fragment assignment

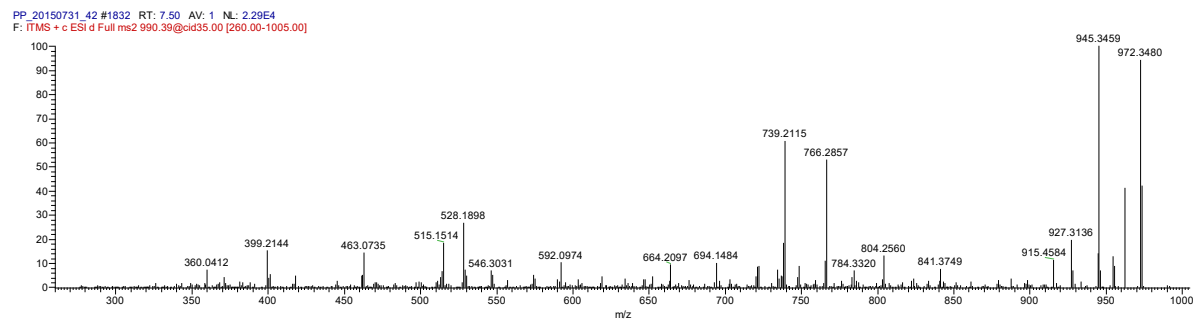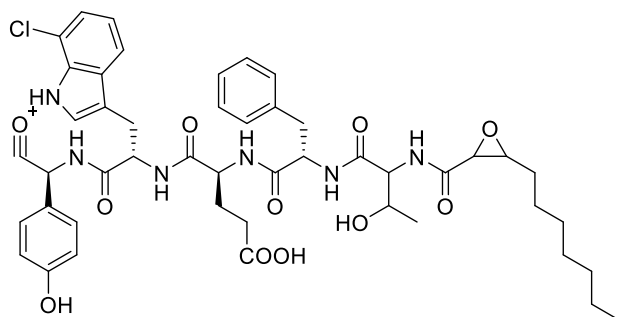

Chemical Formula:  $C_{47}H_{56}ClN_6O_{11}^+$   
Exact Mass: 915.3690

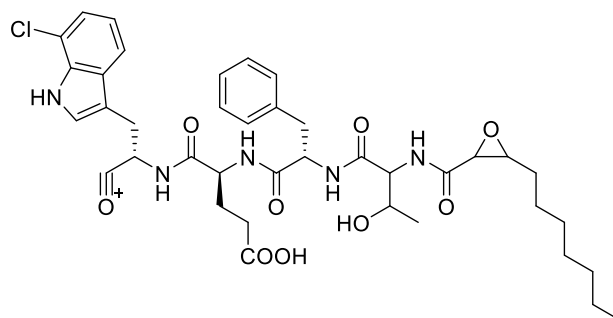

Chemical Formula:  $C_{39}H_{49}ClN_5O_9^+$   
Exact Mass: 766.3213

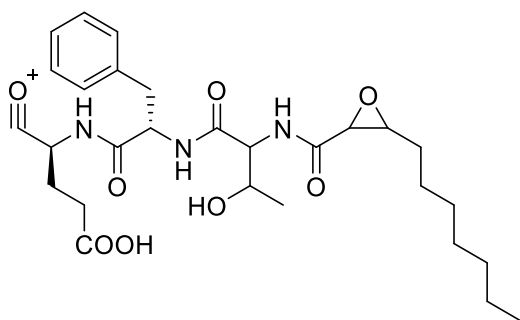

Chemical Formula:  $C_{28}H_{40}N_3O_8^+$   
 Exact Mass: 546.2810

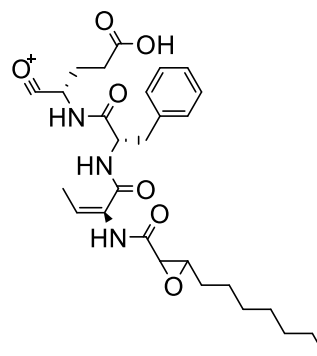

Chemical Formula:  $C_{28}H_{38}N_3O_7^+$   
 Exact Mass: 528.2704

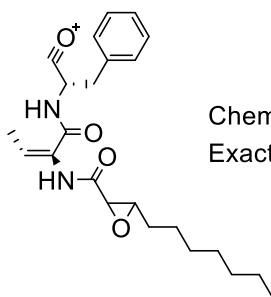

Chemical Formula:  $C_{23}H_{31}N_2O_4^+$   
 Exact Mass: 399.2278

# (7CIW) Chlorinated cystargamide

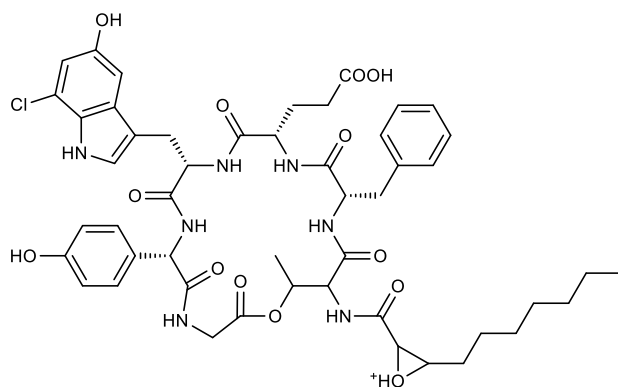

Chemical Formula:  $C_{49}H_{59}ClN_7O_{13}^+$   
Exact Mass: 988.3854

F:\cyst.ms\data\PP\_20150731\_41

01/08/2015 16:33:14

RT: 0.00 - 15.02

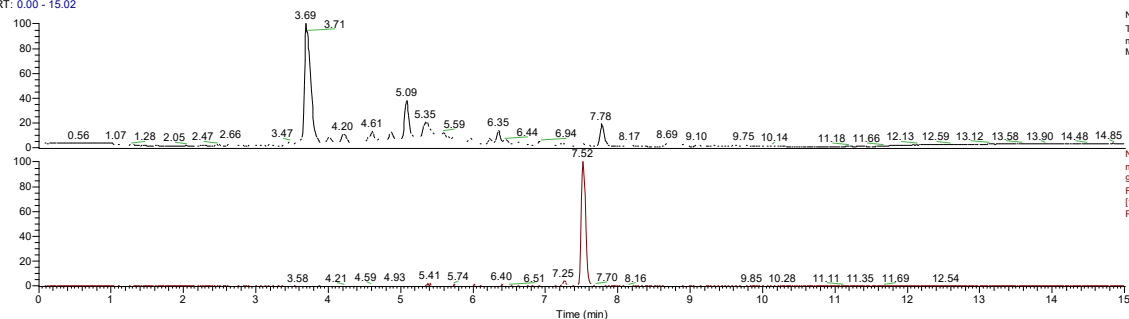

PP\_20150731\_41 #1819 RT: 7.51 AV: 1 SB: 41 7.86-8.43 NL: 6.33E5  
F: FTMS + p ESI Full ms [150.00-1500.00]

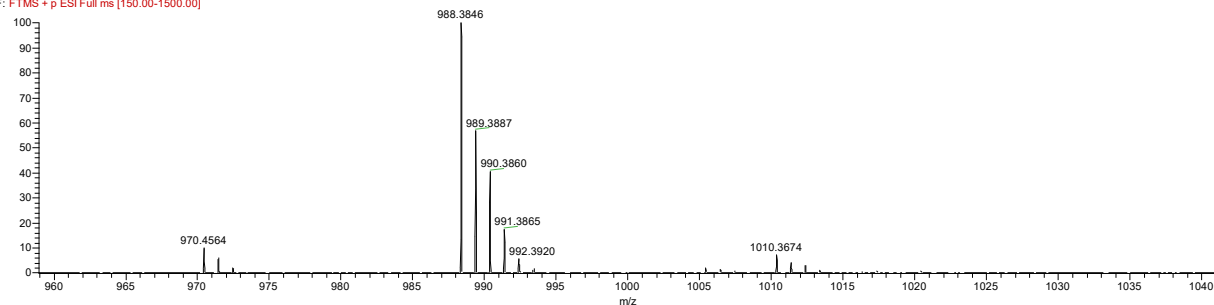

# (7CIW) Chlorinated linear cystargamide

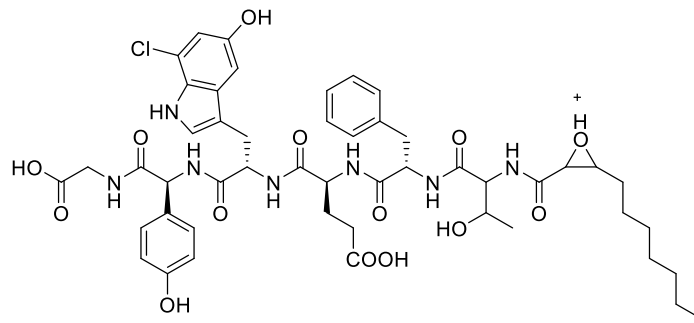

Chemical Formula:  $C_{49}H_{61}ClN_7O_{14}^+$   
 Exact Mass: 1006.3960

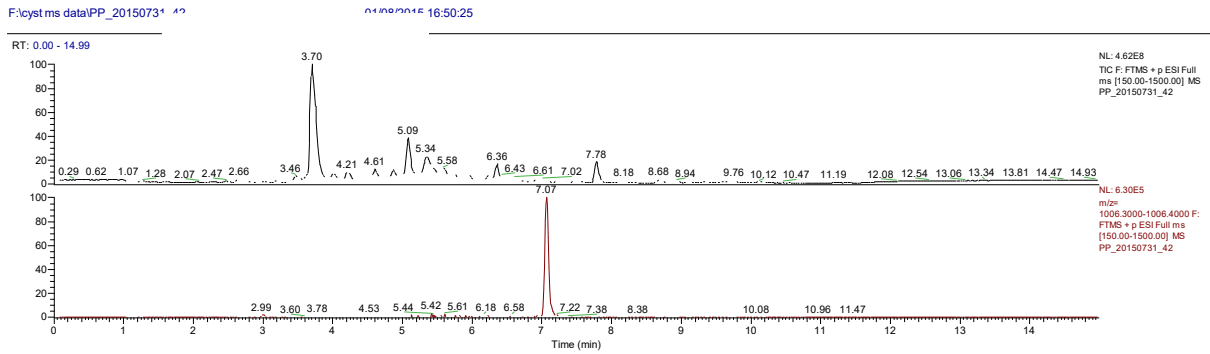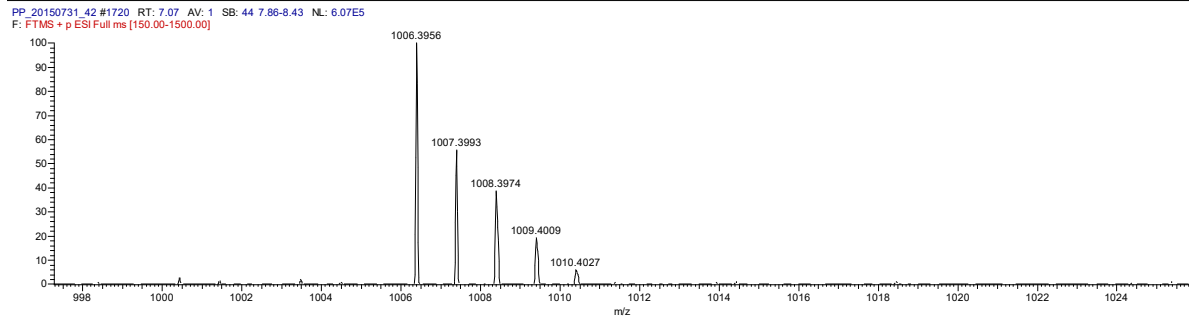

## MS2 spectrum and fragment assignment

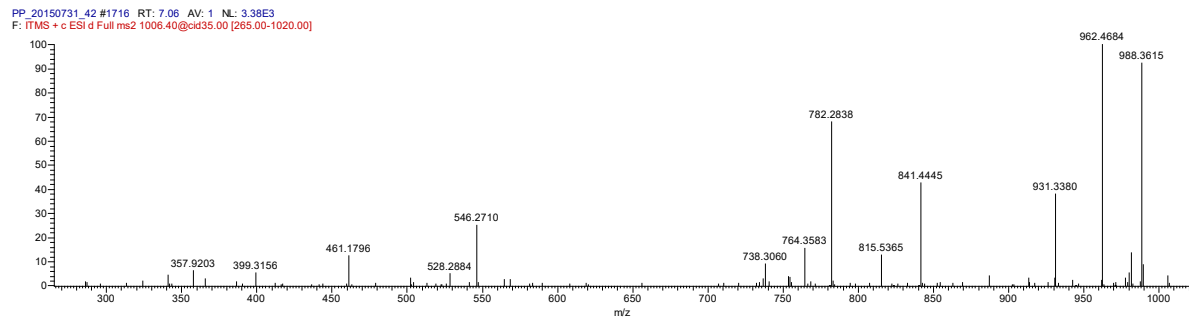

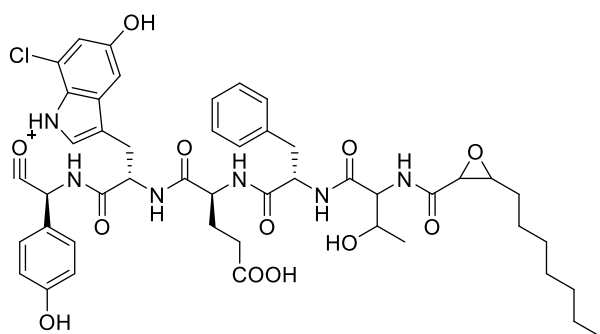

Chemical Formula:  $C_{47}H_{56}ClN_6O_{12}^+$   
Exact Mass: 931.3639

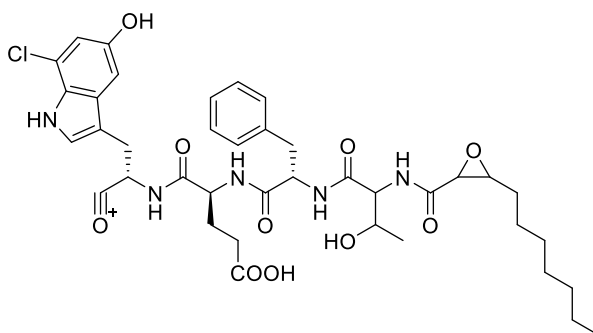

Chemical Formula:  $C_{39}H_{49}ClN_5O_{10}^+$   
Exact Mass: 782.3162

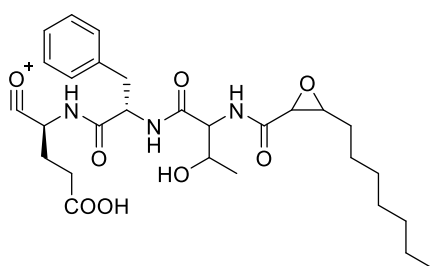

Chemical Formula:  $C_{28}H_{40}N_3O_8^+$   
Exact Mass: 546.2810

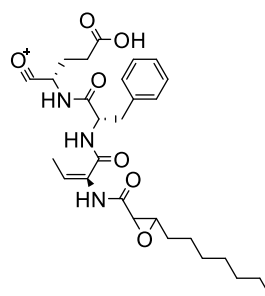

Chemical Formula:  $C_{28}H_{38}N_3O_7^+$   
Exact Mass: 528.2704

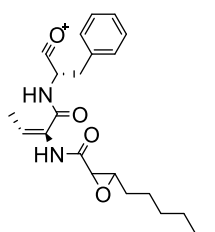

Chemical Formula:  $C_{23}H_{33}N_2O_4^+$   
Exact Mass: 401.2435

## (7CIW) Chlorinated linear cystargamide[ALA] unhydroxylated

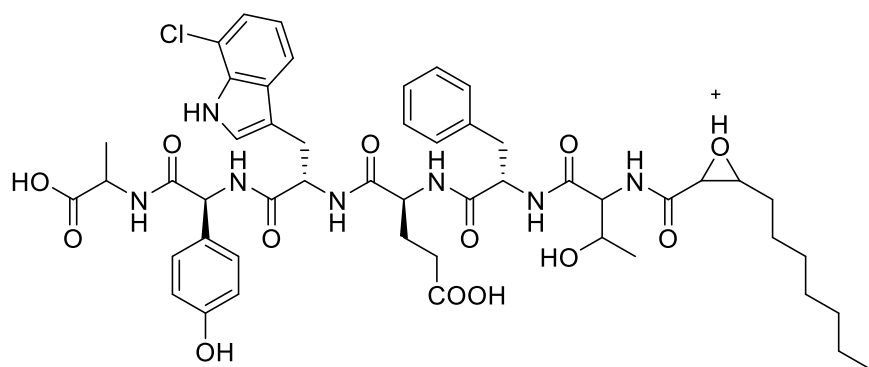

Chemical Formula:  $C_{50}H_{63}ClN_7O_{13}^+$   
Exact Mass: 1004.4167

F:\cyst ms data\PP\_20150731\_41

01/08/2015 16:33:14

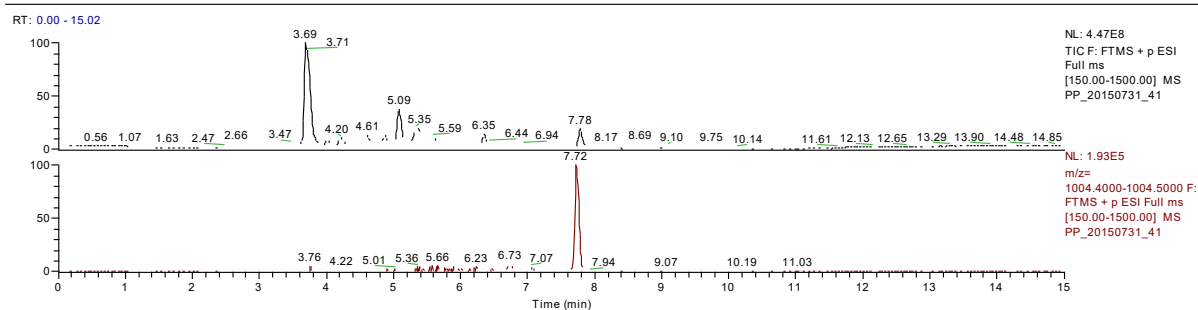

PP\_20150731\_41 #1867 RT: 7.71 AV: 1 SB: 41 7.86-8.43 NL: 1.36E5  
F: FTMS + p ESI Full ms [150.00-1500.00]

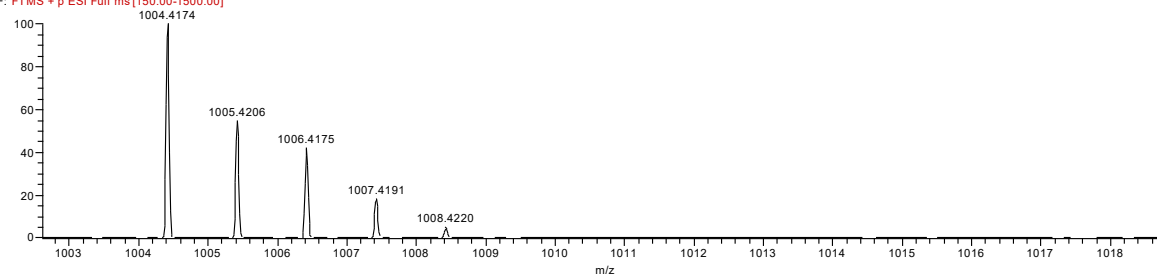

## MS2 spectrum and fragment assignment

PP\_20150731\_41 #1869 RT: 7.72 AV: 1 NL: 4.90E2  
F: ITMS + c ESI d Full ms2 1004.42@cid35.00 [265.00-1015.00]

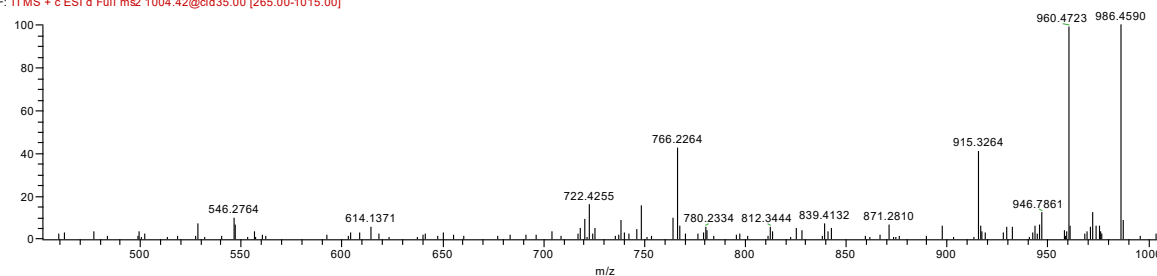

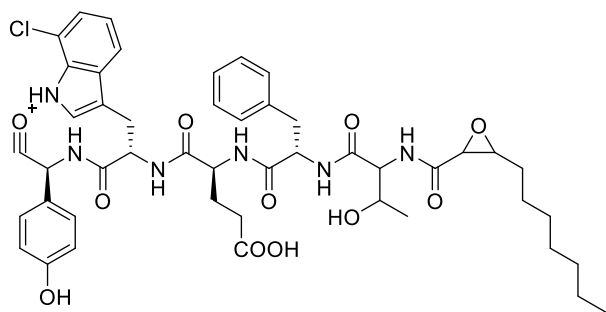

Chemical Formula:  $C_{47}H_{56}ClN_6O_{11}^+$   
 Exact Mass: 915.3690

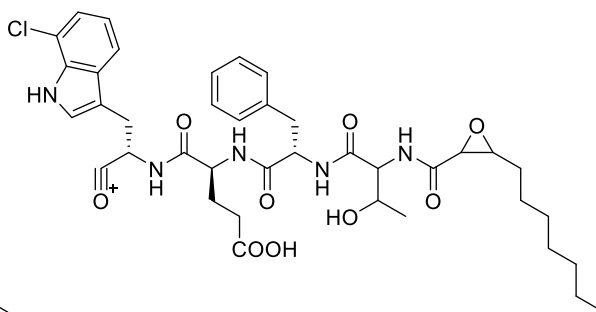

Chemical Formula:  $C_{39}H_{49}ClN_5O_9^+$   
 Exact Mass: 766.3213

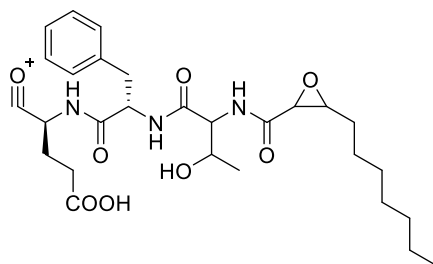

Chemical Formula:  $C_{28}H_{40}N_3O_8^+$   
 Exact Mass: 546.2810



# (7CIW) Chlorinated linear cystargamide[ALA]

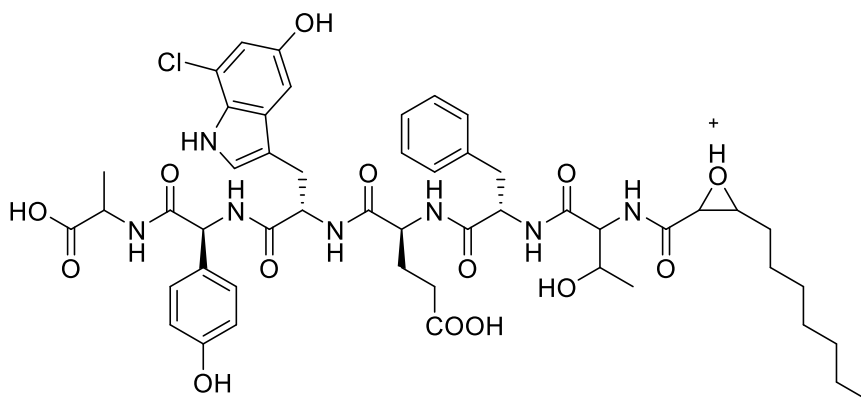

Chemical Formula:  $C_{50}H_{63}ClN_7O_{14}^+$   
Exact Mass: 1020.4116

F:\cyst ms data\PP\_20150731\_41

01/08/2015 16:33:14

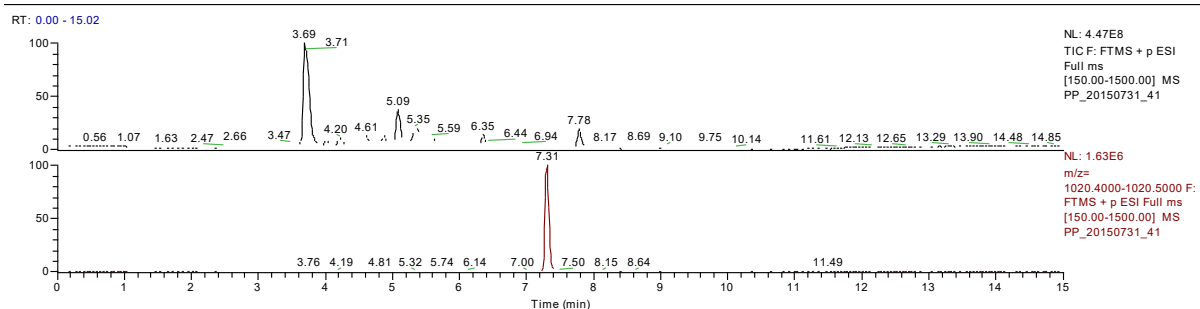

PP\_20150731\_41 #1715-1787 RT: 7.13-7.38 AV: 24 SB: 41 7.86-8.43 NL: 4.18E5  
F: FTMS + p ESI Full ms [150.00-1500.00]

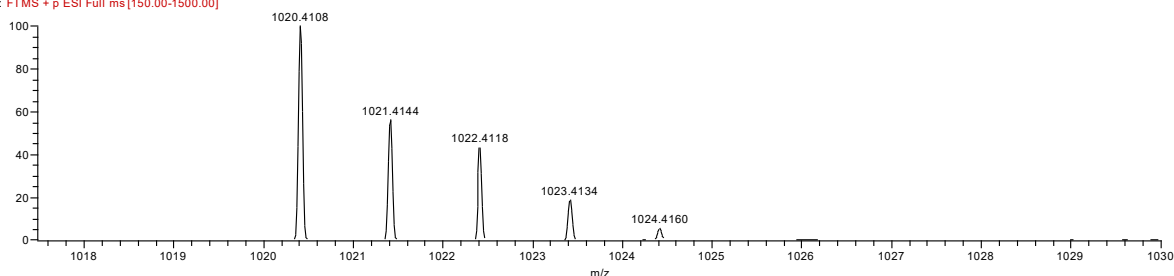

## MS2 spectrum and fragment assignment

PP\_20150731\_41 #1715-1787 RT: 7.28-7.29 AV: 2 NL: 4.78E3  
F: ITMS + c ESI d Full ms2 1020.41@cid35.00 [270.00-1035.00]

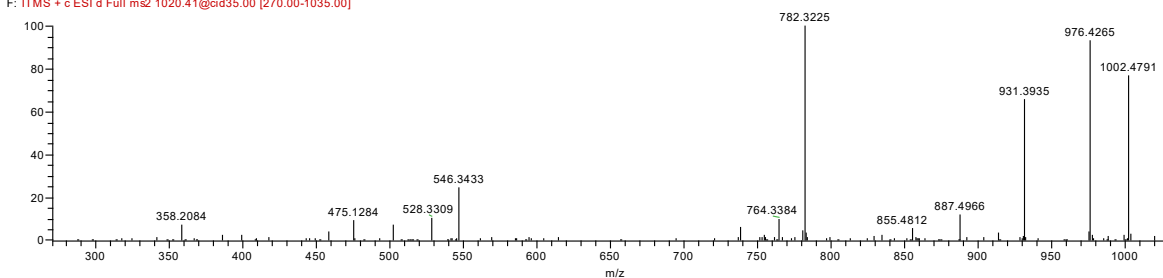

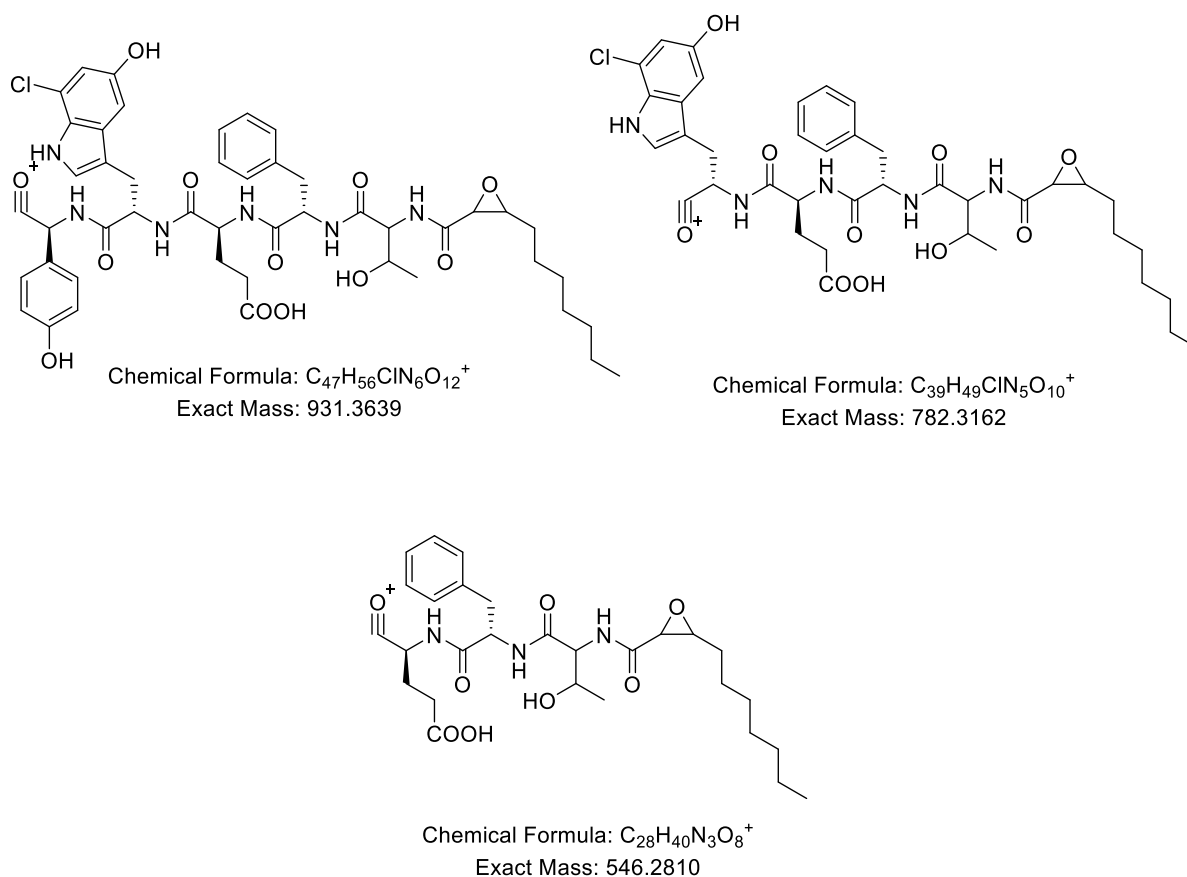

### Cross coupling reaction on Br-Cystargamide

sXPhos **12** (0.6 mg, 1.2  $\mu$ mol) and  $CsCO_3$  (6.0 mg, 20  $\mu$ mol) were added to a microwave tube and flushed with nitrogen. A stock solution of *bis*(acetonitrile)dichloropalladium (II) (0.8 mg, 4  $\mu$ mol) in degassed  $H_2O:CH_3CN$  (1:1, 100  $\mu$ L) was prepared. The catalyst stock solution (10  $\mu$ L, 0.4  $\mu$ mol) was added to the microwave tube, followed by a solution of the Br-Cystargamide **9** (1 mg) in  $H_2O:CH_3CN$  (1:1, 0.2 mL). 3-Fluorophenylacetylene **24** (10  $\mu$ L) was then added. The microwave tube was flushed with nitrogen, then sealed. The reaction mixture was heated at 100 °C for 2 h. The reaction mixture was cooled to r.t. A portion of the reaction mixture (0.1 mL) was removed and diluted with  $H_2O:CH_3CN$  (1:1, 0.2 mL). Polystyrene supported triphenylphosphine (5 mg) was added the sample was well shaken. The sample was filtered through a plug of cotton wool, then centrifuged (13,000 rpm, 16060 g, 5 min). The reaction mixture (30  $\mu$ L) diluted with  $H_2O:CH_3CN$  (9:1, 970  $\mu$ L) and analysed by LC-MS.

LC-MS analysis showed signals consistent with the product **64** at 1072  $[M+H]^+$ , as well as the hydrolysed linear form of the peptide **65** at 1090  $[M+H]^+$ .

$^{19}\text{F}$  NMR (470 MHz,  $\text{D}_2\text{O}$ )  $\delta = -114.05$  (1F, ddd,  $J(\text{H,F}) = 9.9, 9.3, 5.7$  Hz),  $-114.43$  (1F, ddd,  $J(\text{H,F}) = 9.7, 9.6, 6.3$  Hz); Assignment of  $^{19}\text{F}$  NMR signals to the cyclized and linear products respectively is tentative, and based on the observed ratios by LC-MS.

Compound **65** MS (ESI) 1090 (50)  $[\text{M}+\text{H}]^+$ , 1046 (40), 641 (40), 515 (100), 376 (50); HRMS:  $m/z$  calcd for  $\text{C}_{57}\text{H}_{65}\text{F}_1\text{N}_7\text{O}_{14}$   $[\text{M}+\text{H}]^+$ : 1090.4568; found: 1090.4562;

Compound **64** MS (ESI) 1072 (30)  $[\text{M}+\text{H}]^+$ , 1028 (20), 635 (40), 567 (20), 421 (60), 376 (100); HRMS:  $m/z$  calcd for  $\text{C}_{57}\text{H}_{63}\text{F}_1\text{N}_7\text{O}_{13}$   $[\text{M}+\text{H}]^+$ : 1072.4462; found: 1072.4464.

### Cross Coupled Cyclised Cystargamide (64)

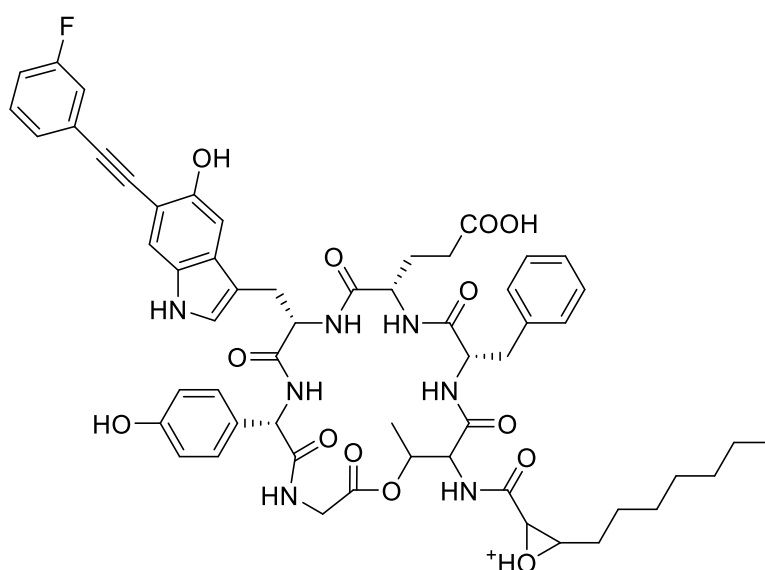

RT: 0.00 - 14.99

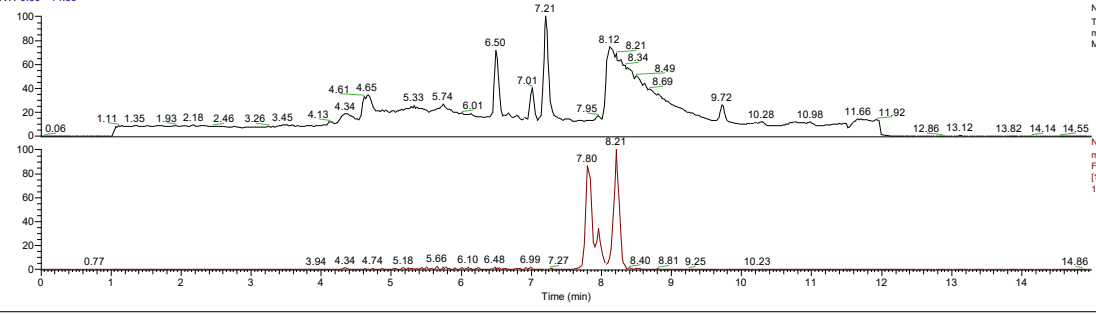

NL: 9.68E7  
TIC: F: FTMS + p ESI Full  
ms [150.00-1500.00]  
MS 160217MJC20503

NL: 2.48E5  
m/z: 1072.40-1072.50  
F: FTMS + p ESI Full ms  
[150.00-1500.00] MS  
160217MJC20503

160217MJC20503 #678 RT: 7.80 AV: 1 NL: 2.12E5

F: FTMS + p ESI Full ms [150.00-1500.00]

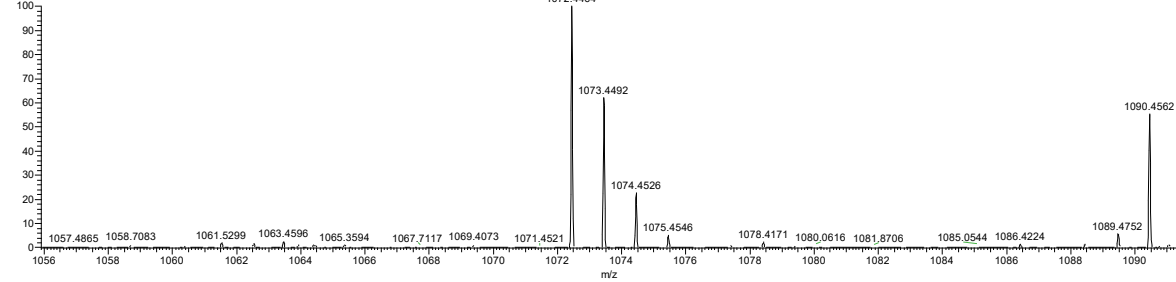

RT: 0.00 - 14.99

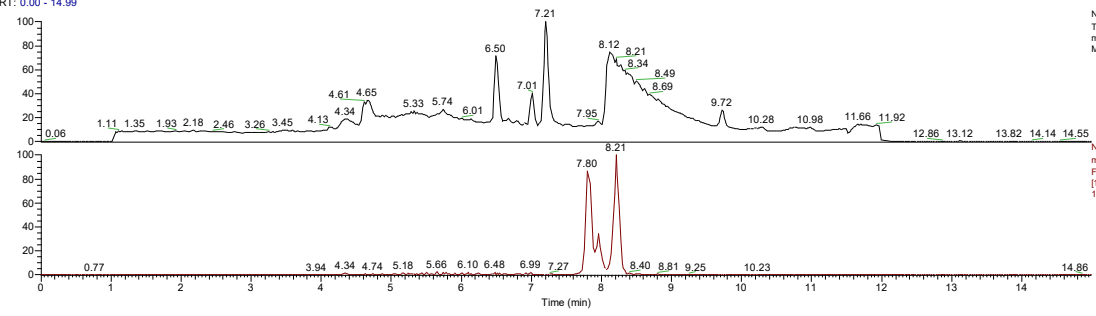

NL: 9.68E7  
TIC: F: FTMS + p ESI Full  
ms [150.00-1500.00]  
MS 160217MJC20503

NL: 2.48E5  
m/z: 1072.40-1072.50  
F: FTMS + p ESI Full ms  
[150.00-1500.00] MS  
160217MJC20503

160217MJC20503 #679 RT: 7.81 AV: 1 NL: 2.39E3

F: FTMS + c ESI d Full ms2 1072.45@cid35.00 [285.00-1085.00]

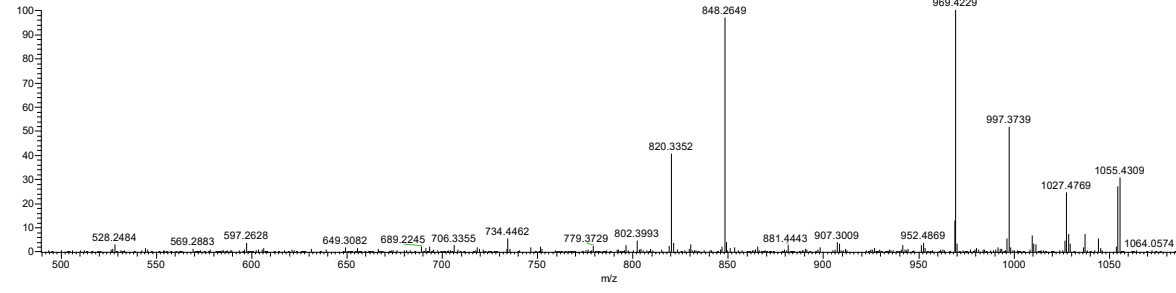

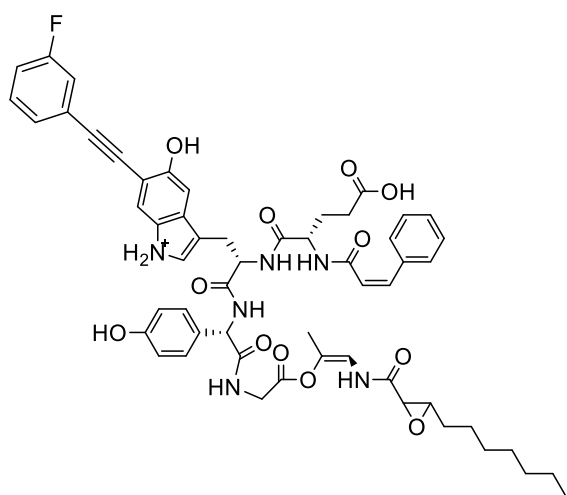

Exact Mass: 1027.4248

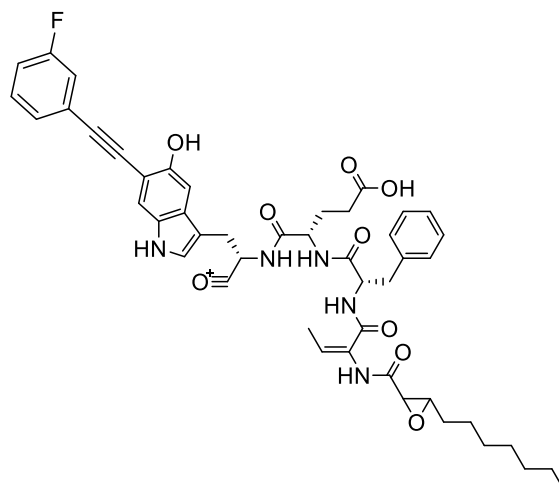

Exact Mass: 848.3665

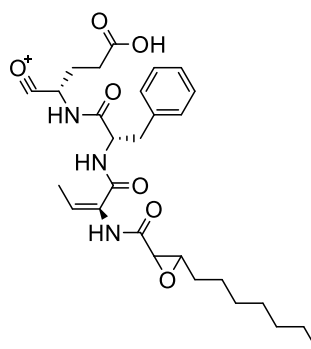

Exact Mass: 528.2704

### Cross Coupled Linear Cystargamide (65)

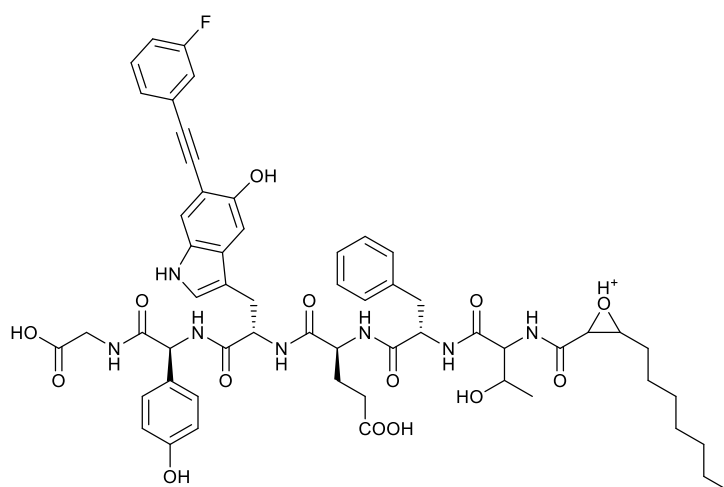

RT: 0.00 - 14.99

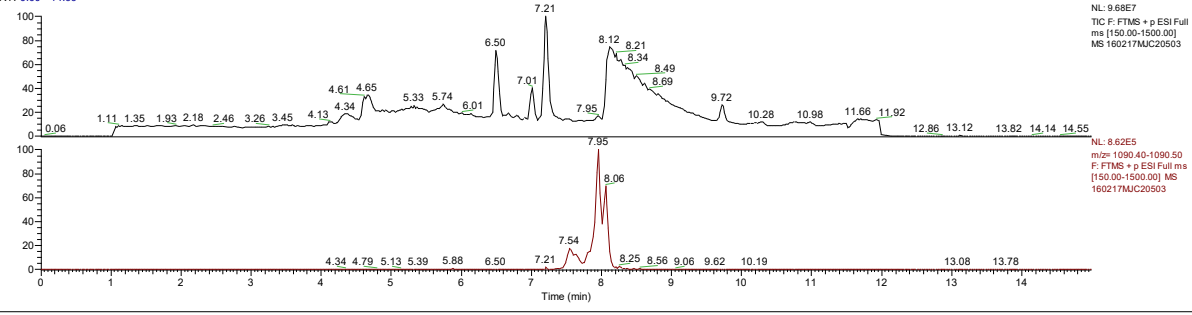

160217MJC20503 #693 RT: 7.95 AV: 1 NL: 8.51E5  
F: FTMS + p ESI Full ms [150.00-1500.00]

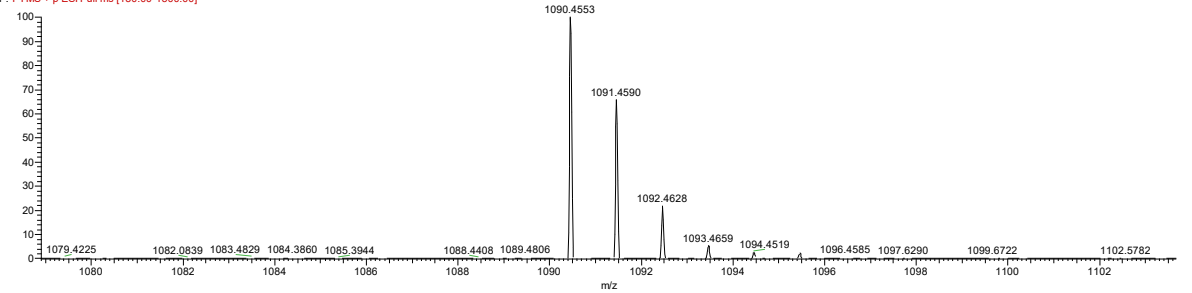

RT: 0.00 - 14.99

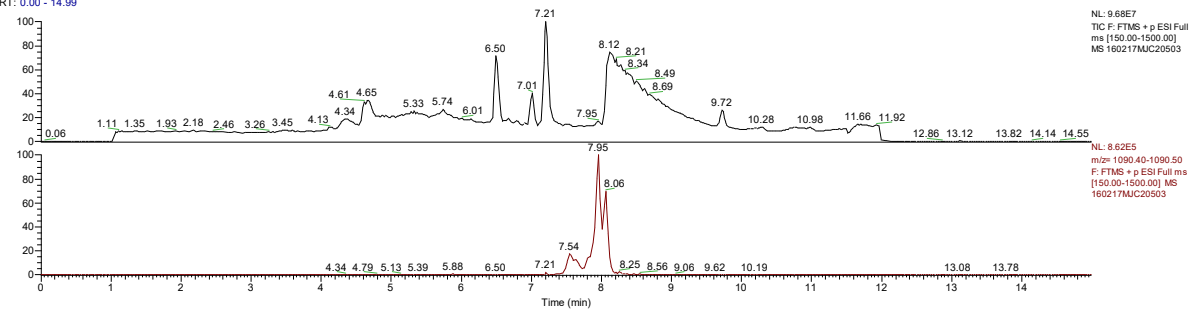

160217MJC20503 #698 RT: 7.55 AV: 1 NL: 1.91E3  
F: ITMS + c ESI d Full ms2 1090.46@cid35.00 [290.00-1105.00]

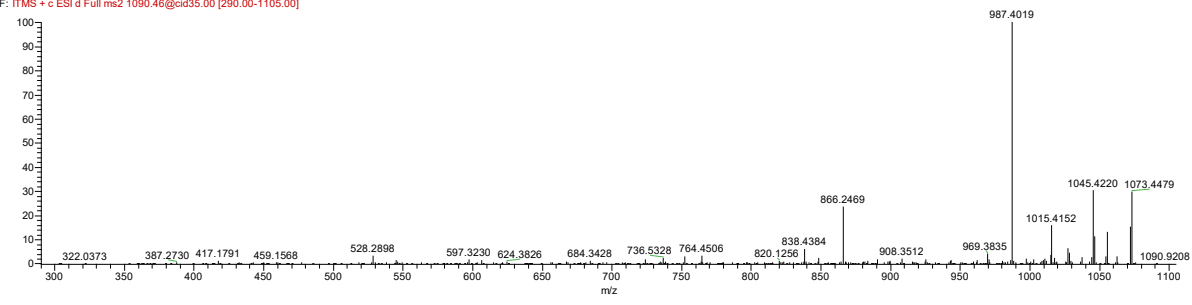

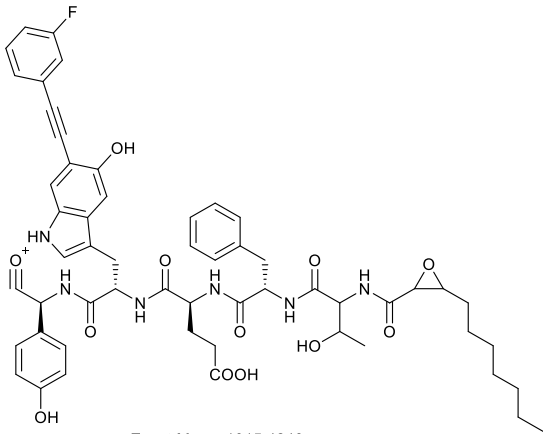

Exact Mass: 1015.4248

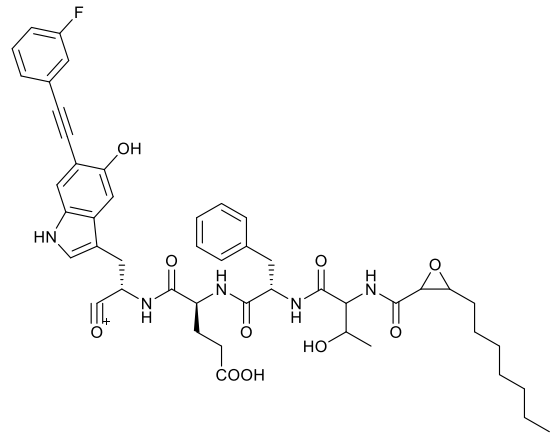

Exact Mass: 866.3771

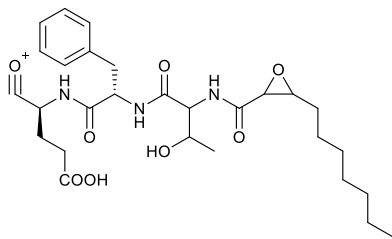

Exact Mass: 546.2810

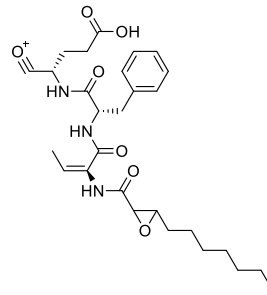

Exact Mass: 528.2704

**UPLC chromatograms of purified cystargamide (top/black) and the best purified fraction of brominated cystargamide (bottom/blue) used for cross coupling experiment.**

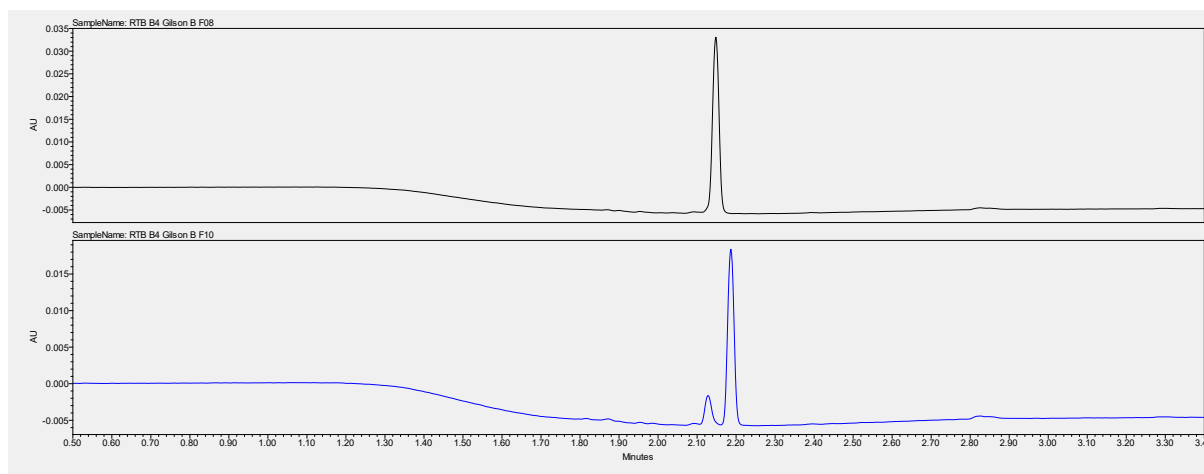

|   | Name                                                      | Retention Time | Area  | % Area |
|---|-----------------------------------------------------------|----------------|-------|--------|
| 1 | Cystargamide (top chromatogram)                           | 2.128          | 4619  | 14.53  |
| 2 | Brominated cystargamide derivatives (bottom chromatogram) | 2.187          | 27181 | 85.47  |

1. D. R. M. Smith, T. Willemse, D. S. Gkotsi, W. Schepens, B. U. W. Maes, S. Ballet and R. J. M. Goss, *Org. Lett.* 2014, **16**, 2622-2625.
2. K. W. Anderson and S. L. Buchwald, *Angew. Chem. Int. Ed.* 2005, **44**, 6173-6177.
3. K. A. Gill, F. Berru , J. C. Arens and R. G. Kerr, *J. Nat. Prod.*, 2014, **77**, 1372-1376.



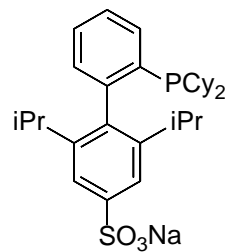

**12**  
 $^1\text{H NMR}$  ( $\text{CD}_3\text{OD}$ )

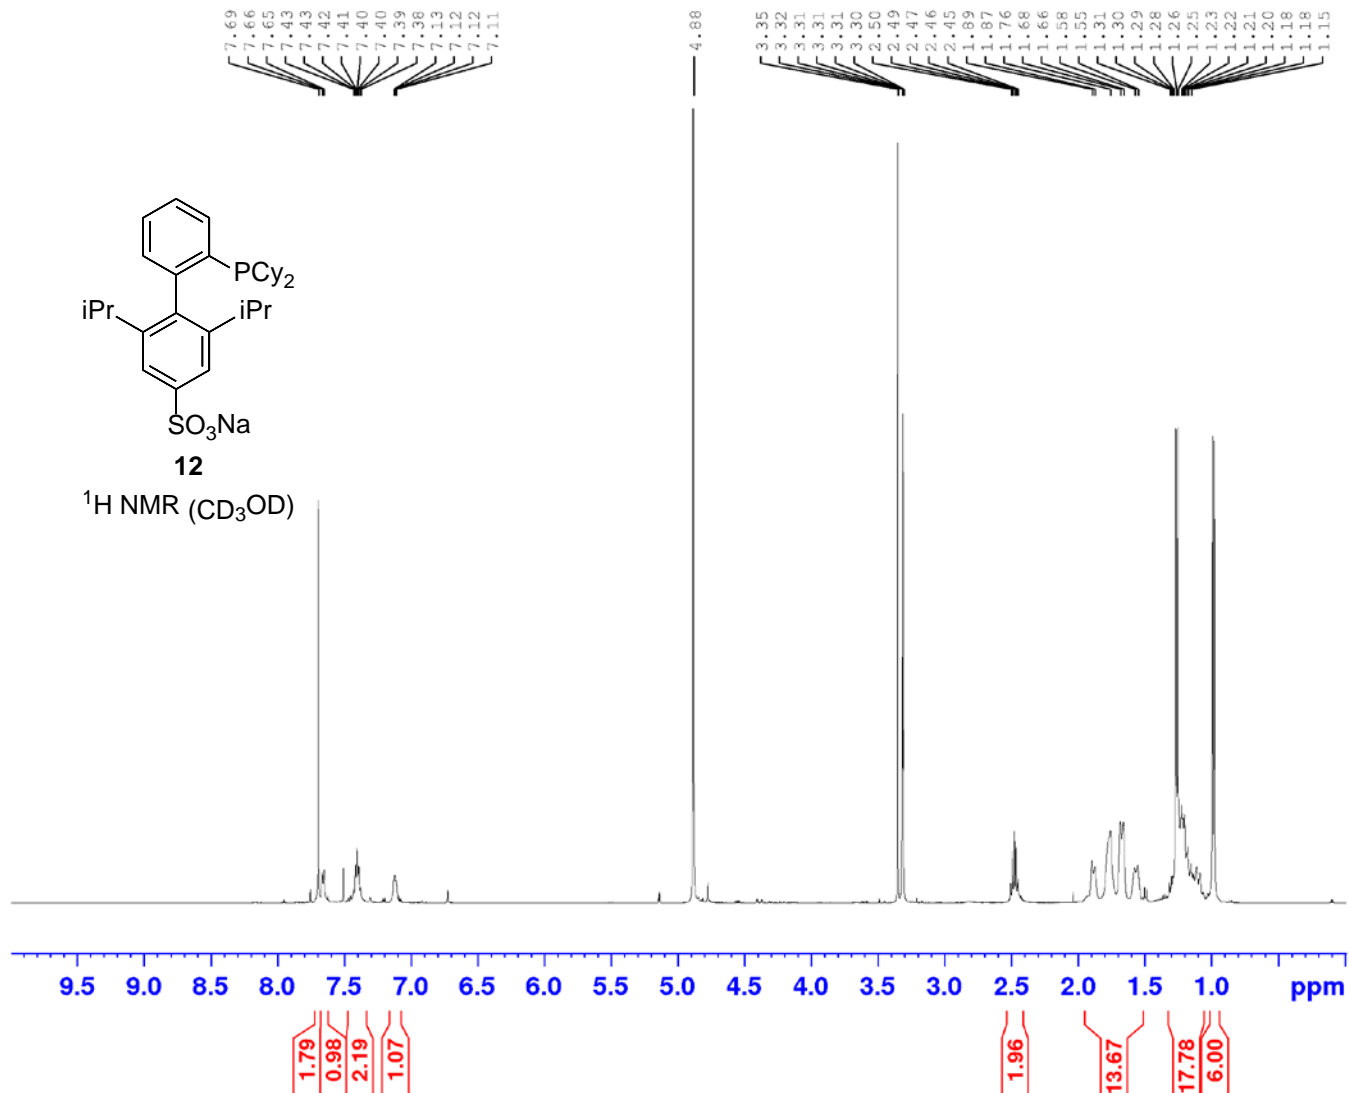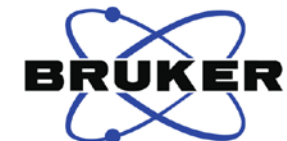

Current Data Parameters  
 NAME 09092014-37-rjmg-mc410b-A  
 EXPNO 10  
 PROCNO 1

F2 - Acquisition Parameters  
 Date\_ 20140909  
 Time 19.59  
 INSTRUM spect  
 PROBHD 5 mm PABBO BB/  
 PULPROG zg30  
 ID 65536  
 SOLVENT MeOD  
 NS 8  
 DS 2  
 SWH 7002.801 Hz  
 FIDRES 0.106854 Hz  
 AQ 4.6792703 sec  
 RG 90.5  
 DW 71.400 usec  
 DE 11.40 usec  
 TE 295.0 K  
 D1 1.0000000 sec  
 TDO 1

----- CHANNEL f1 -----  
 SFO1 500.1330008 MHz  
 NUC1 1H  
 P1 10.35 usec  
 PLW1 24.0000000 W

F2 - Processing parameters  
 SI 65536  
 SF 500.1300097 MHz  
 WDW EM  
 SSB 0  
 LB 0.30 Hz  
 GB 0  
 PC 1.00

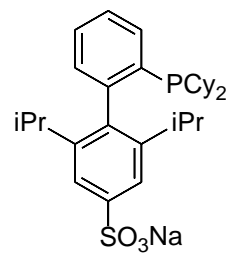

**12**  
<sup>13</sup>C NMR (CD<sub>3</sub>OD)

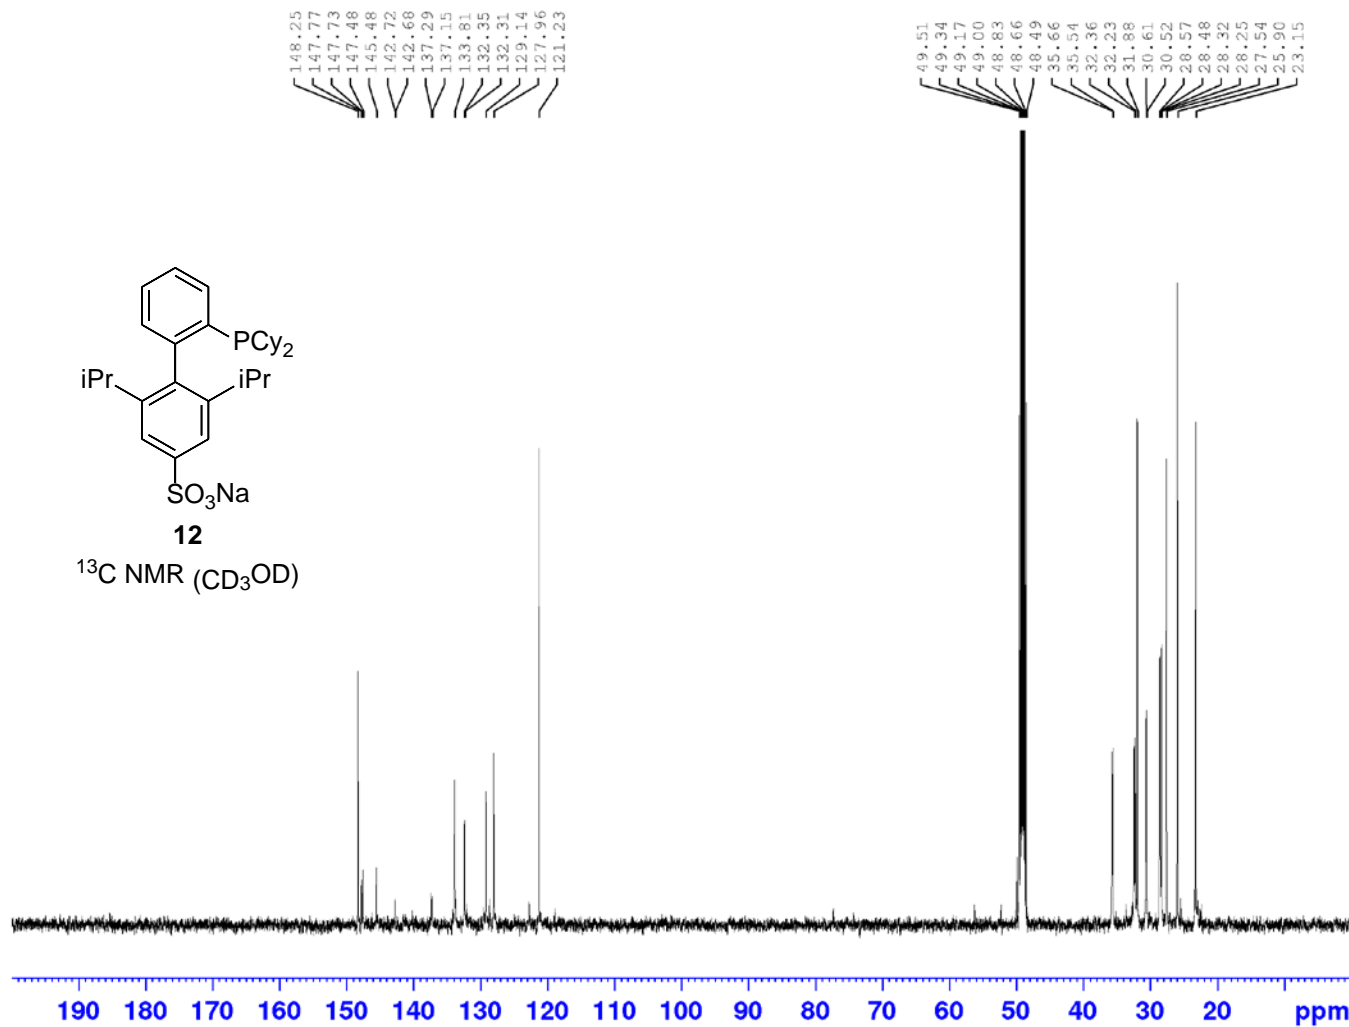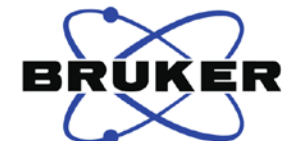

Current Data Parameters  
 NAME 09092014-37-rjmg-mc410b-A  
 EXPNO 11  
 PROCNO 1

F2 - Acquisition Parameters  
 Date\_ 20140909  
 Time 20.54  
 INSTRUM spect  
 PROBHD 5 mm PABBO BB/  
 PULPROG udeflt  
 TD 21424  
 SOLVENT MeOD  
 NS 800  
 DS 0  
 SWH 29761.904 Hz  
 FIDRES 1.389185 Hz  
 AQ 0.3599232 sec  
 RG 128  
 DW 16.800 usec  
 DE 7.96 usec  
 TE 295.0 K  
 D1 3.0000000 sec  
 D11 0.0300000 sec  
 D12 0.0000200 sec  
 D20 200.0000000 sec  
 TDC 1

----- CHANNEL f1 -----  
 SFO1 125.7716224 MHz  
 NUC1 13C  
 P1 8.90 usec  
 P13 2000.00 usec  
 P26 500.00 usec  
 PLW1 125.0000000 W  
 SPNAM[5] Crp60comp.4  
 SFOAL5 0.500  
 SPOFFS5 0 Hz  
 SFWS 15.12800026 W  
 SPNAM[8] Crp60,0.5,20.1  
 SFOAL8 0.500  
 SPOFFS8 0 Hz  
 SFWS8 15.12800026 W

----- CHANNEL f2 -----  
 SFO2 500.1320005 MHz  
 NUC2 1H  
 CPDPRG[2] waltz65  
 PCPD2 80.00 usec  
 PLW2 24.0000000 W  
 PLW12 0.39015001 W

F2 - Processing parameters  
 SI 262144  
 SF 125.7576141 MHz  
 WDW EM  
 SSB 0  
 LB 2.00 Hz  
 GB 0  
 FC 1.40

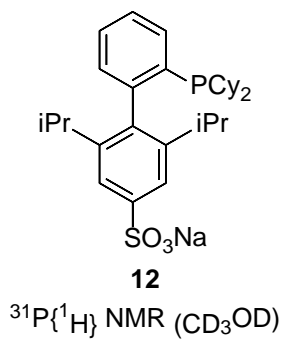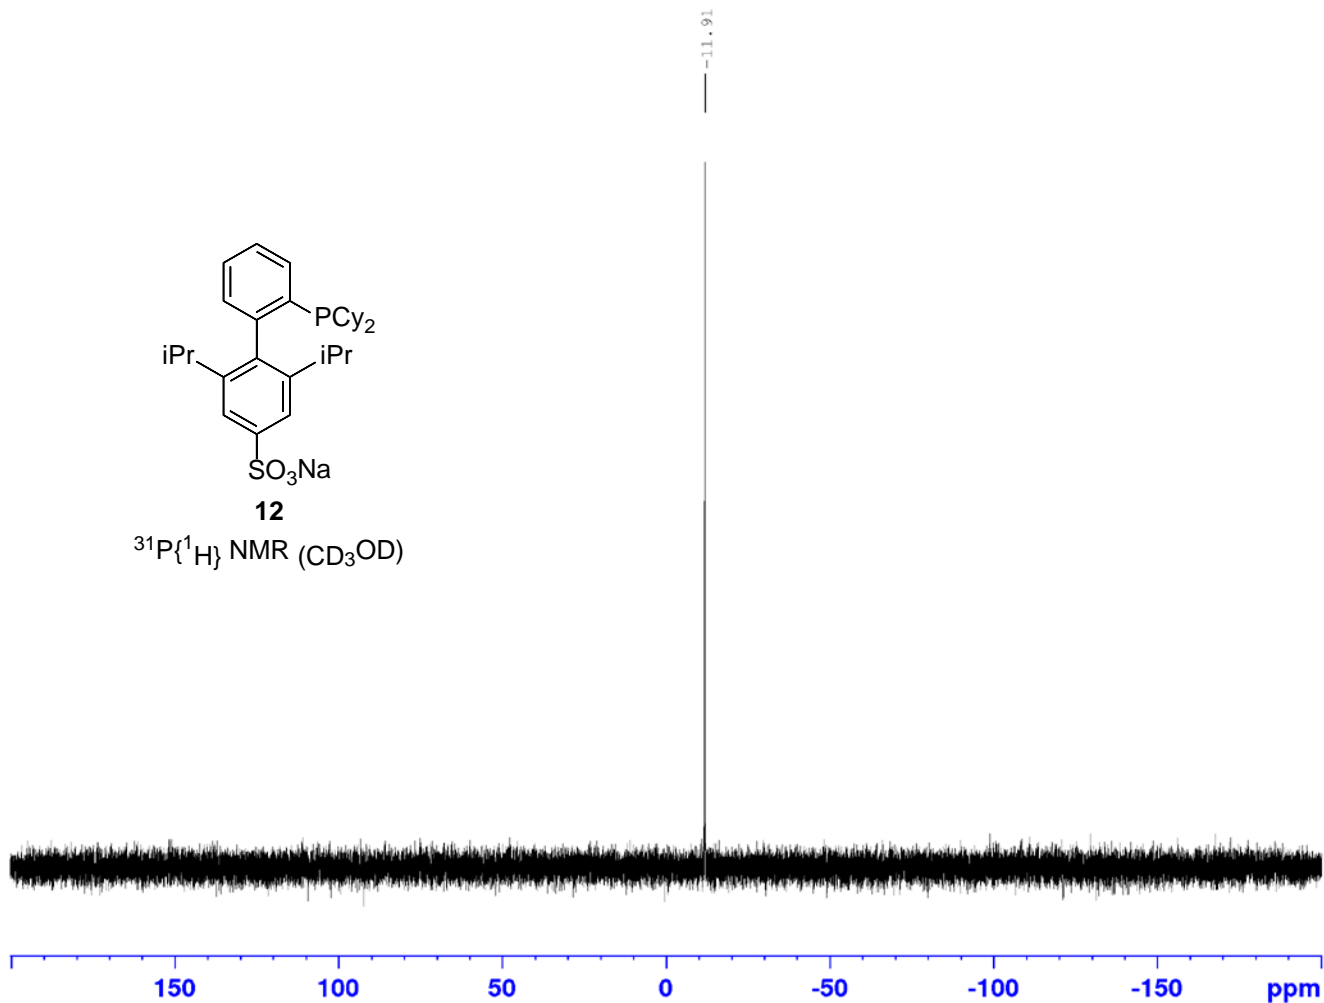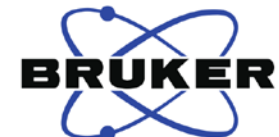

Current Data Parameters  
 NAME 09052014-11-rjmg-mc410b-N  
 EXPNO 10  
 PROCNO 1

F2 - Acquisition Parameters  
 Date\_ 20140905  
 Time 9.41  
 INSTRUM AV400  
 PROBHD 5 mm PABBO BB-  
 PULPROG zgpg30  
 TD 65536  
 SOLVENT MeOD  
 NS 128  
 DS 4  
 SWH 64935.066 Hz  
 FIDRES 0.990830 Hz  
 AQ 0.5046272 sec  
 RG 2048  
 DW 7.700 usec  
 DE 6.50 usec  
 TE 297.7 K  
 D1 1.50000000 sec  
 D11 0.03000000 sec  
 TD0 1

----- CHANNEL f1 -----  
 NUC1 31P  
 P1 15.00 usec  
 PL1 3.74 dB  
 PL1W 11.00252919 W  
 SFO1 162.0444100 MHz

----- CHANNEL f2 -----  
 CPDPRG[2] waltz65  
 NUC2 1H  
 PCPD2 80.00 usec  
 PL2 -3.00 dB  
 PL12 14.00 dB  
 PL13 14.00 dB  
 PL2W 19.24057770 W  
 PL12W 0.38389999 W  
 PL13W 0.38389999 W  
 SFO2 400.3020015 MHz

F2 - Processing parameters  
 SI 65536  
 SF 162.0444100 MHz  
 WDW EM  
 SSB 0  
 LB 1.00 Hz  
 GB 0  
 PC 1.40

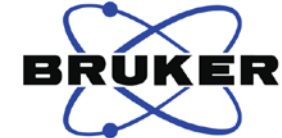

Current Data Parameters  
NAME 02172016-7-rjmg-mc410-A  
EXPNO 10  
PROCNO 1

F2 - Acquisition Parameters  
Date\_ 20160217  
Time 23.47  
INSTRUM spect  
PROBHD 5 mm CFPBBO BB  
PULPROG zg30  
TD 65536  
SOLVENT MeOD  
NS 64  
DS 2  
SWH 7002.801 Hz  
FIDRES 0.106854 Hz  
AQ 4.6792703 sec  
RG 64  
DW 71.400 usec  
DE 10.95 usec  
TE 295.0 K  
D1 1.00000000 sec  
TD0 1

===== CHANNEL f1 =====  
SFO1 500.1330008 MHz  
NUC1 1H  
P1 12.50 usec  
PLW1 14.00000000 W

F2 - Processing parameters  
SI 65536  
SF 500.1300097 MHz  
WDW EM  
SSB 0  
LB 0.30 Hz  
GB 0  
PC 1.00

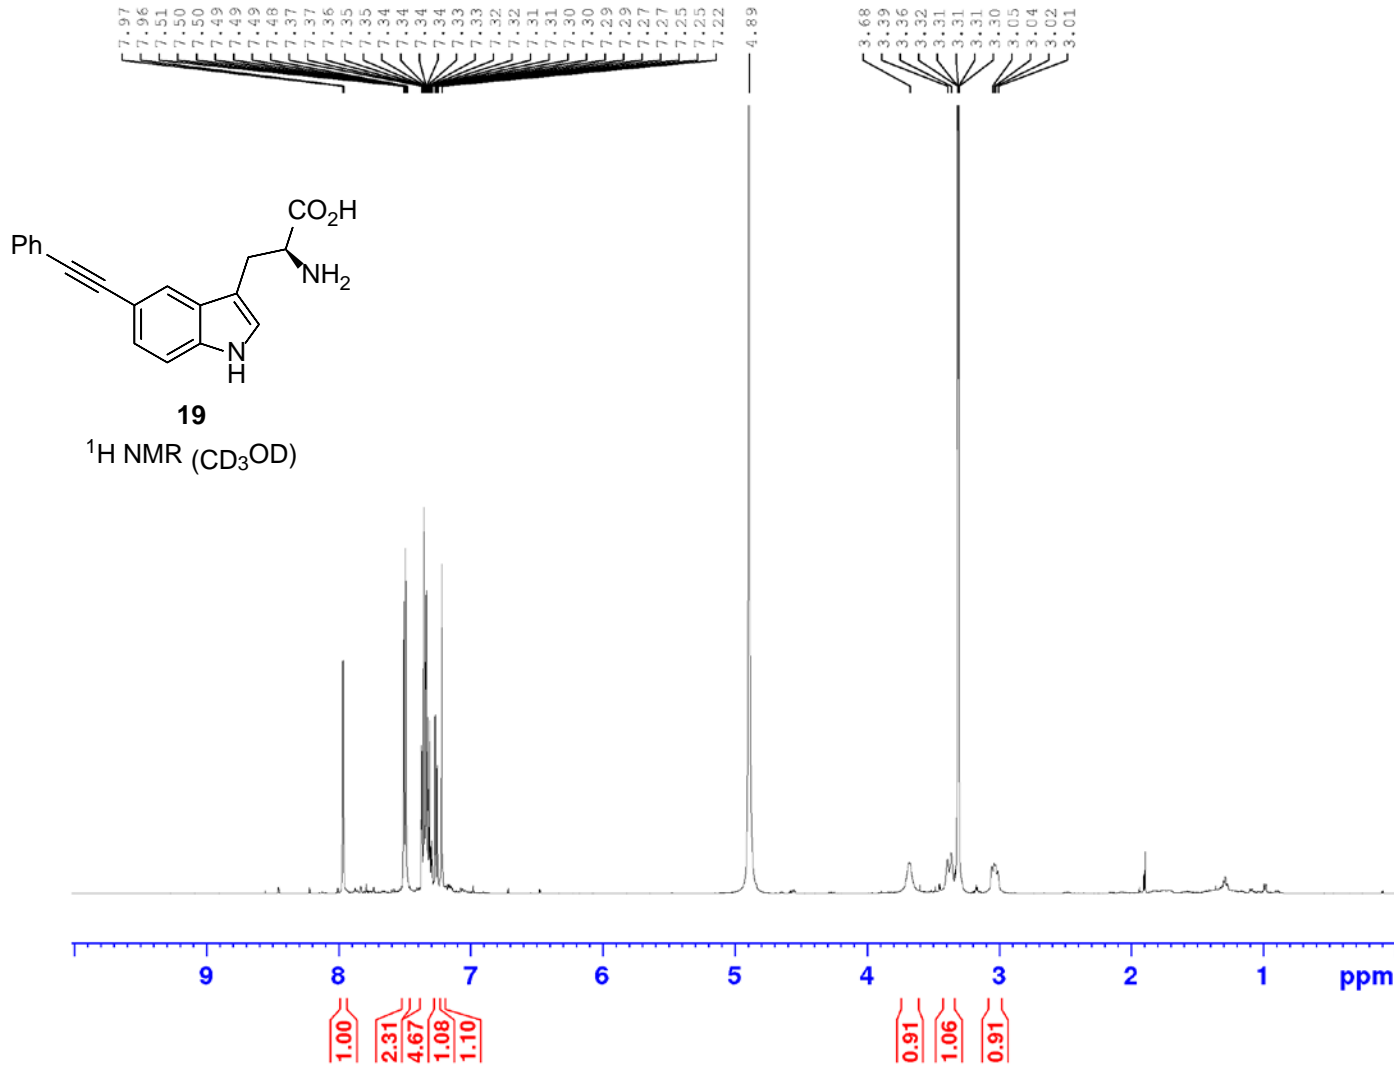

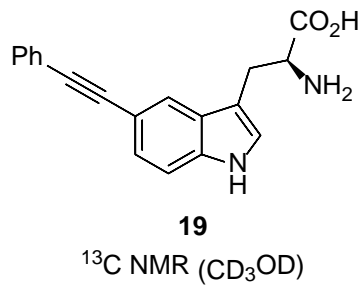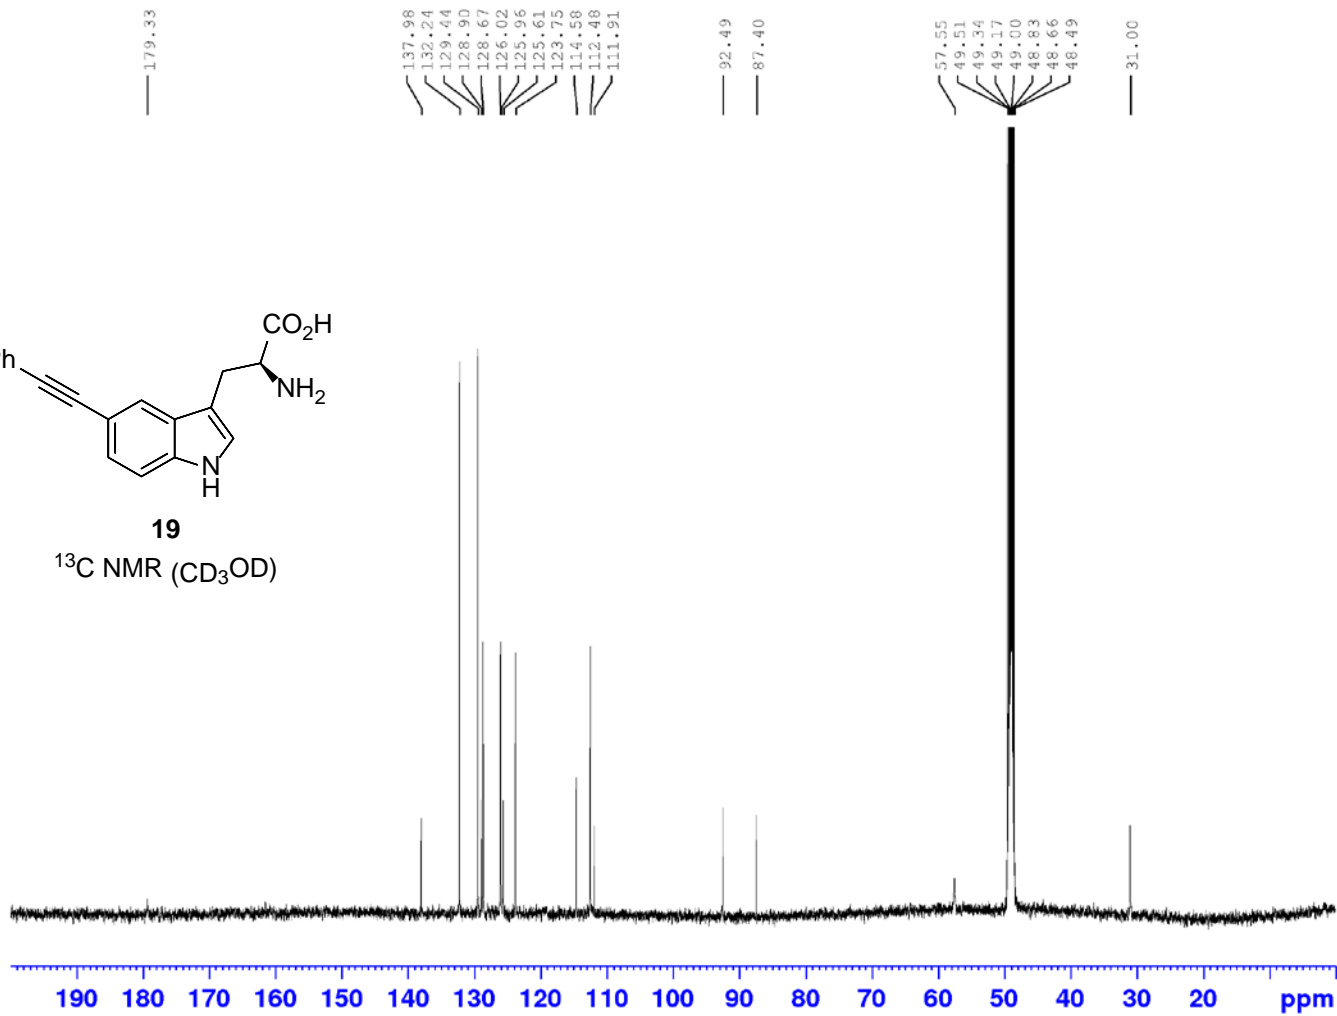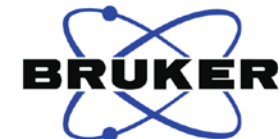

Current Data Parameters  
 NAME 02172016-7-r jmg-mc410-A  
 EXPNO 11  
 PROCNO 1

F2 - Acquisition Parameters  
 Date\_ 20160218  
 Time 1.06  
 INSTRUM spect  
 PROBHD 5 mm CPPBBO BB  
 PULPROG udeft  
 TD 21424  
 SOLVENT MeOD  
 NS 1200  
 DS 0  
 SWH 29761.904 Hz  
 FIDRES 1.389185 Hz  
 AQ 0.3599232 sec  
 RG 128  
 DW 16.800 usec  
 DE 19.22 usec  
 TE 295.0 K  
 D1 3.0000000 sec  
 D11 0.0300000 sec  
 D12 0.0000000 sec  
 D20 200.0000000 sec  
 TD0 1

----- CHANNEL f1 -----  
 SFO1 125.7716219 MHz  
 NUC1 13C  
 P1 11.00 usec  
 P13 2000.00 usec  
 F26 500.00 usec  
 PLW1 63.0000000 W  
 SPNAM[5] Crp60comp.4  
 SPOAL5 0.500  
 SPOFFS5 0 Hz  
 SPW5 11.64700031 W  
 SPNAM[8] Crp60,0.5,20.1  
 SPOAL8 0.500  
 SPOFFS8 0 Hz  
 SPW8 11.64700031 W

----- CHANNEL f2 -----  
 SFO2 500.1320005 MHz  
 NUC2 1H  
 CPDPRG[2] waltz65  
 FCPD2 80.00 usec  
 PLW2 14.0000000 W  
 PLW12 0.3150000 W

F2 - Processing parameters  
 SI 262144  
 SF 125.7576124 MHz  
 WDW EM  
 SSB 0  
 LB 2.00 Hz  
 GB 0  
 FC 1.40

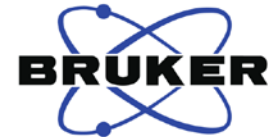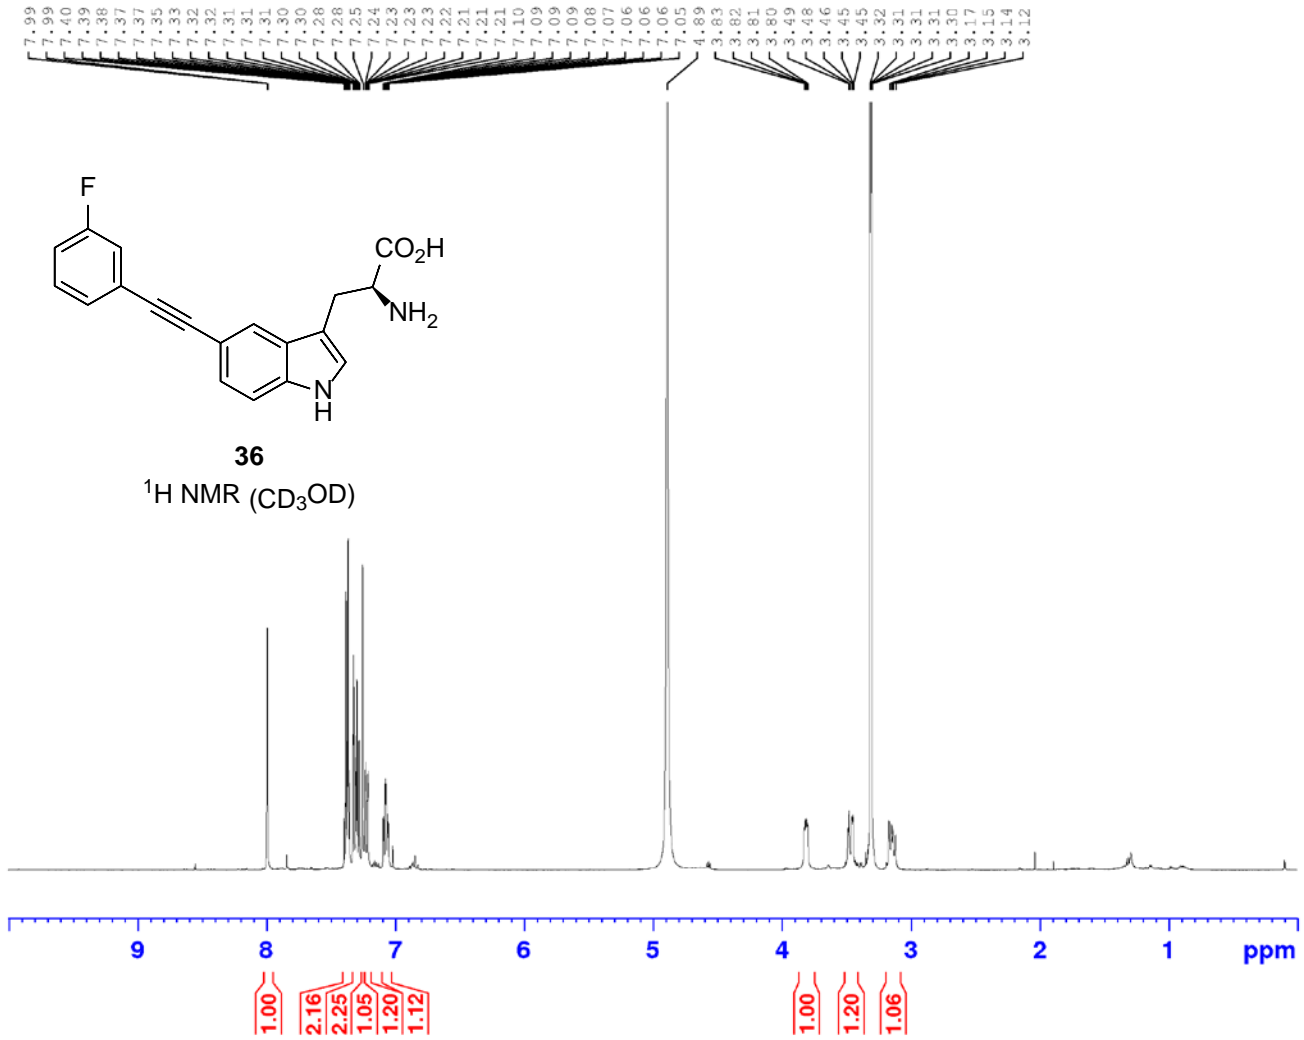

Current Data Parameters  
NAME 03112016-6-rjmg-mc410-A  
EXPNO 10  
PROCNO 1

F2 - Acquisition Parameters  
Date\_ 20160312  
Time 1.17  
INSTRUM spect  
PROBHD 5 mm CPPBBO BB  
PULPROG zg30  
TD 65536  
SOLVENT MeOD  
NS 64  
DS 2  
SWH 7002.801 Hz  
FIDRES 0.106854 Hz  
AQ 4.6792703 sec  
RG 64  
DW 71.400 usec  
DE 10.95 usec  
TE 295.0 K  
D1 1.00000000 sec  
TD0 1

==== CHANNEL f1 =====  
SFO1 500.1330008 MHz  
NUC1 1H  
P1 12.50 usec  
PLW1 14.00000000 W

F2 - Processing parameters  
SI 65536  
SF 500.1300097 MHz  
WDW EM  
SSB 0  
LB 0.30 Hz  
GB 0  
PC 1.00

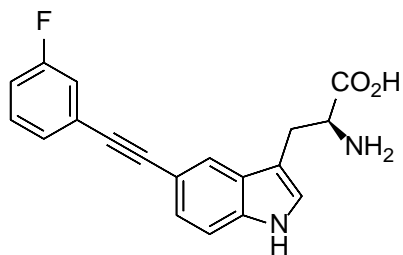

**36**

$^{19}\text{F}\{^1\text{H}\}$  NMR ( $\text{CD}_3\text{OD}$ )

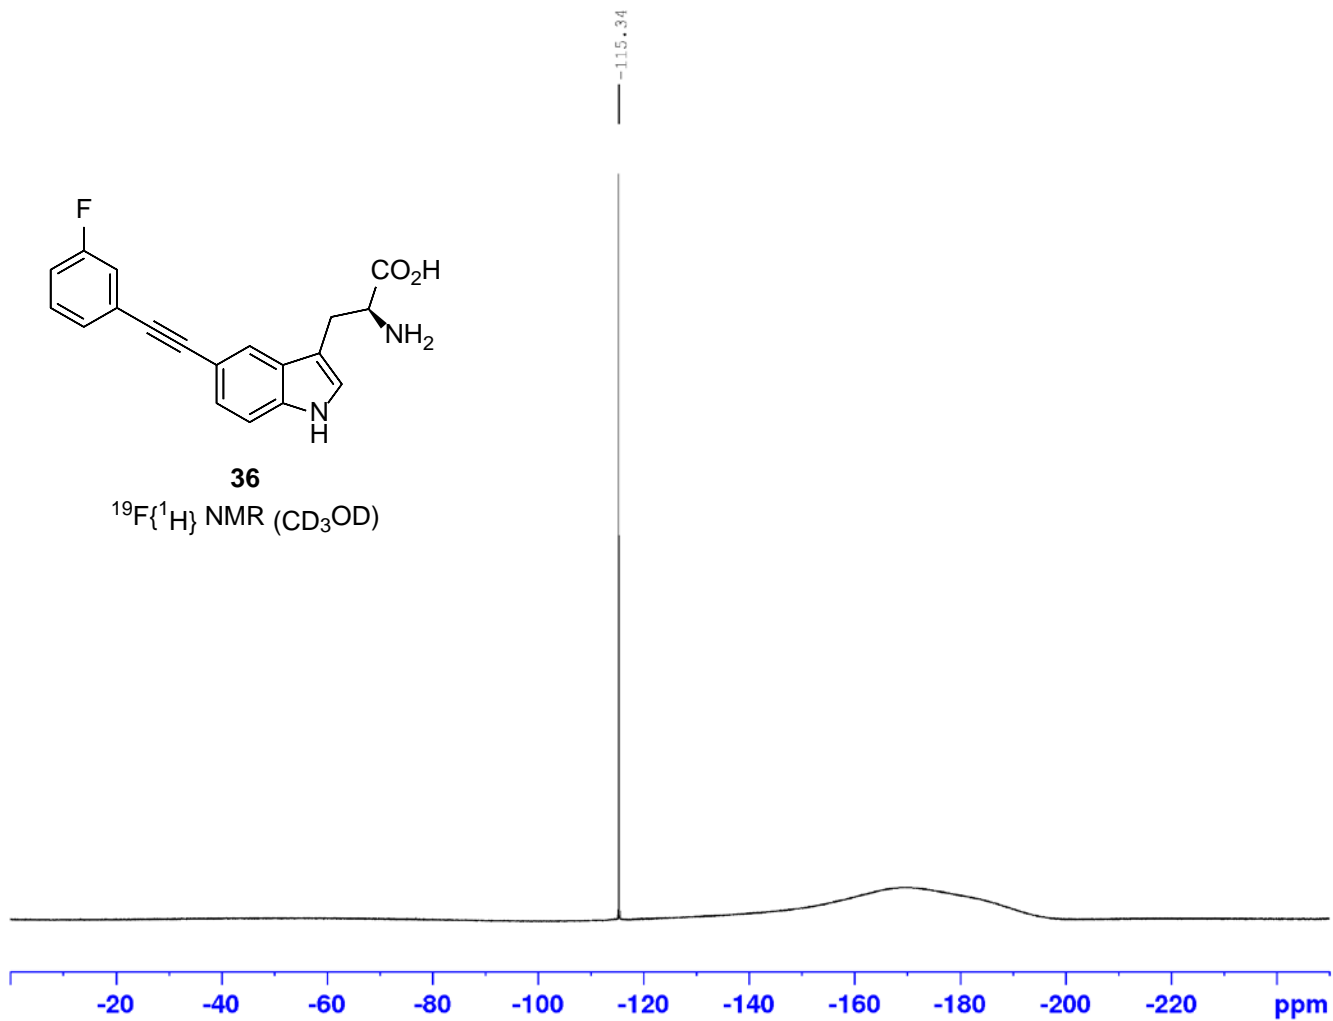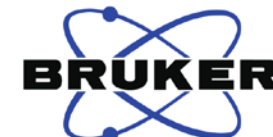

Current Data Parameters  
 NAME 01262016-1-rjmg-mc410-F  
 EXPNO 11  
 PRCCNO 1

F2 - Acquisition Parameters  
 Date\_ 20160126  
 Time 19.10  
 INSTRUM spect  
 PROBHD 5 mm PABBO BB/  
 PULPROG zgfhigqn.3.and  
 TD 131072  
 SOLVENT MeOD  
 NS 64  
 DS 4  
 SWH 125000.000 Hz  
 FIDRES 0.953674 Hz  
 AQ 0.5242880 sec  
 RG 121.22  
 DW 4.000 usec  
 DE 6.93 usec  
 TE 295.0 K  
 D1 1.00000000 sec  
 D11 0.03000000 sec  
 D12 0.00002000 sec  
 TDO 1

----- CHANNEL f1 -----  
 SFO1 470.3477405 MHz  
 NUC1 19F  
 P1 14.60 usec  
 PLW1 48.00000000 W

----- CHANNEL f2 -----  
 SFO2 499.9319997 MHz  
 NUC2 1H  
 CPDPRG2 waltz65  
 PCPD2 80.00 usec  
 PLW2 16.00000000 W  
 PLW12 0.27563000 W

F2 - Processing parameters  
 SI 65536  
 SF 470.4041892 MHz  
 WDW EM  
 SSB 0  
 LB 0.30 Hz  
 GB 0  
 PC 1.00

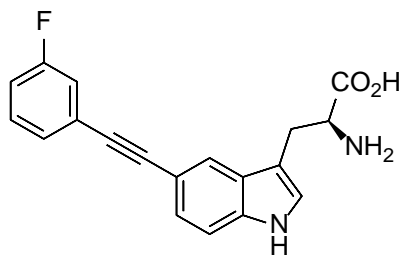

**36**  
<sup>19</sup>F NMR (CD<sub>3</sub>OD)

-115.28  
 -115.30  
 -115.30  
 -115.32  
 -115.32  
 -115.33  
 -115.34

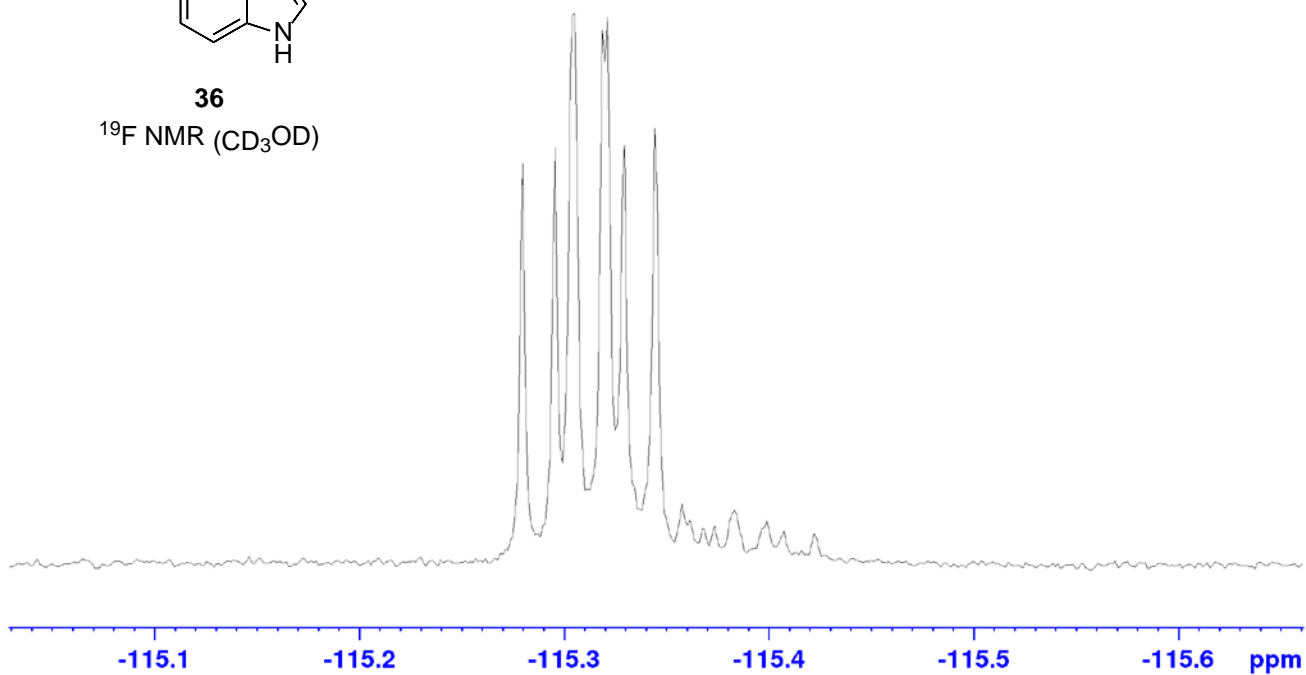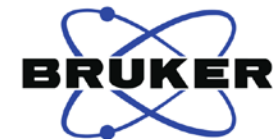

Current Data Parameters  
 NAME 03162016-7-rjmq-mc410-M  
 EXPNO 10  
 PROCNO 1

F2 - Acquisition Parameters  
 Date\_ 20160316  
 Time 11.04  
 INSTRUM AVII400  
 PROBHD 5 mm PABBO BB/  
 PULPROG zgpg30  
 TD 65536  
 SOLVENT MeOD  
 NS 64  
 DS 4  
 SWE 30000.000 Hz  
 FIDRES 0.457764 Hz  
 AQ 1.0922667 sec  
 RG 128  
 DW 16.667 usec  
 DE 8.37 usec  
 TE 294.8 K  
 D1 1.0000000 sec  
 TD0 1

----- CHANNEL f1 -----  
 SFO1 376.4569514 MHz  
 NUC1 19F  
 P1 15.00 usec  
 PLW1 17.00000000 W

F2 - Processing parameters  
 SI 65536  
 SF 376.4983662 MHz  
 WDW EM  
 SSB 0  
 LB 0.30 Hz  
 GB 0  
 PC 1.00



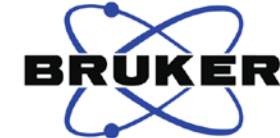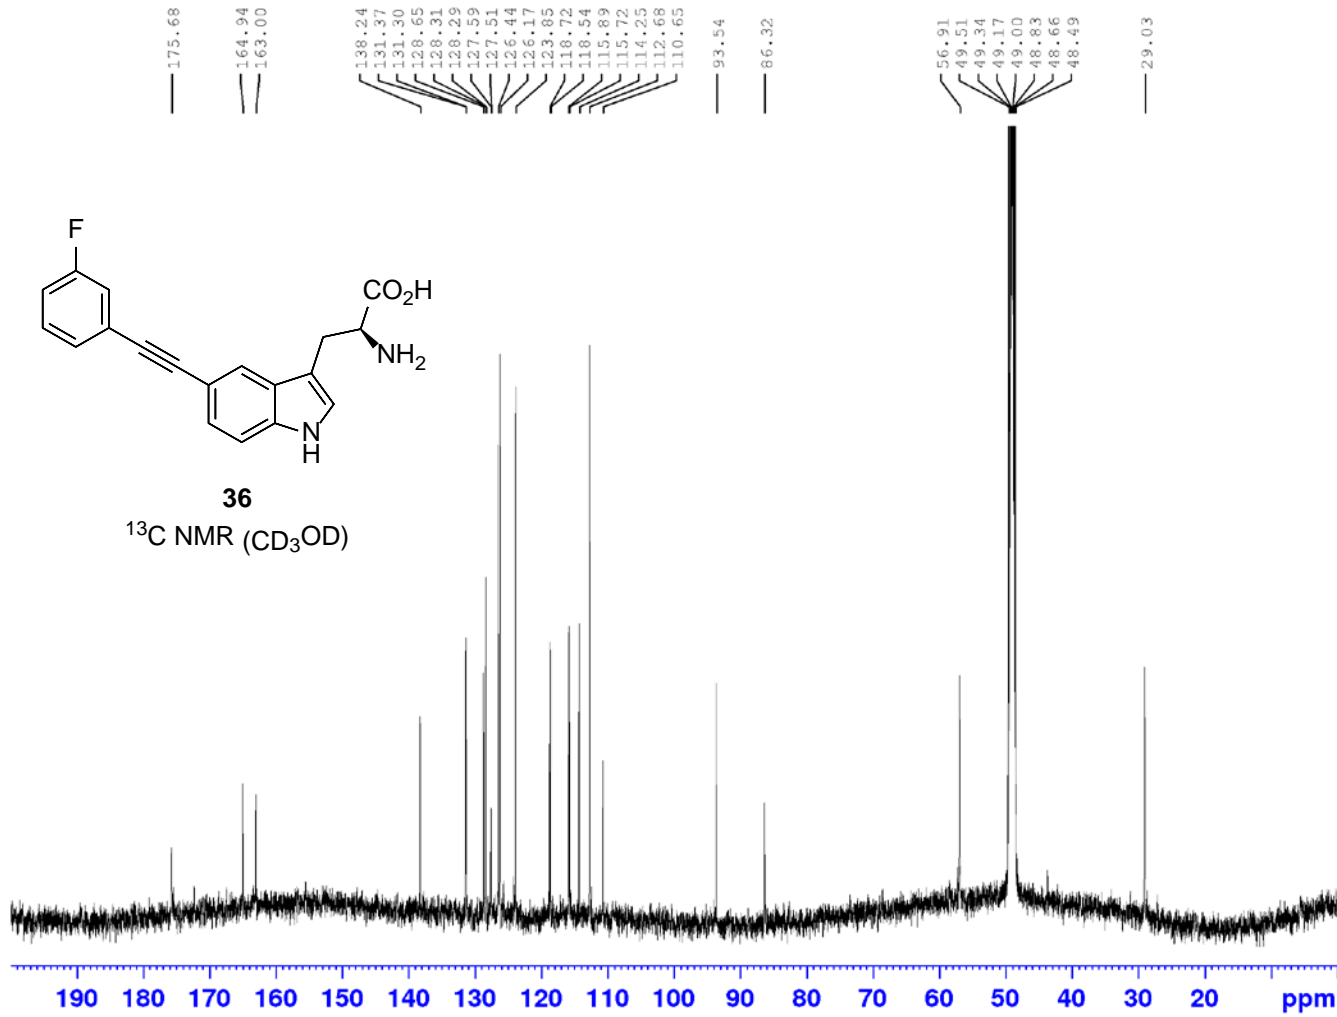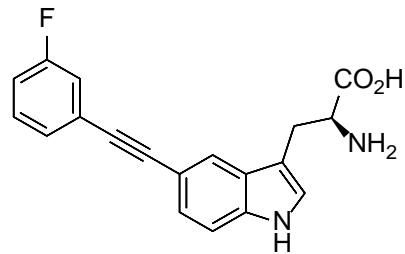

**36**  
<sup>13</sup>C NMR (CD<sub>3</sub>OD)

- 175.68
- 164.94
- 163.00
- 138.24
- 131.37
- 131.30
- 128.65
- 128.31
- 128.29
- 127.59
- 127.51
- 126.44
- 126.17
- 123.85
- 118.72
- 118.54
- 115.89
- 115.72
- 114.25
- 112.68
- 110.65
- 93.54
- 86.32
- 56.91
- 49.51
- 49.34
- 49.17
- 49.00
- 48.83
- 48.66
- 48.49
- 29.03

Current Data Parameters  
NAME 03112016-6-rjmg-mc410-A  
EXPNO 11  
PROCNO 1

F2 - Acquisition Parameters  
Date\_ 20160312  
Time 3.14  
INSTRUM spect  
PROBHD 5 mm CFPBBO BB  
PULPROG udeflt  
TD 21424  
SOLVENT MeOD  
NS 1800  
DS 0  
SWH 29761.904 Hz  
FIDRES 1.389185 Hz  
AQ 0.3599232 sec  
RG 128  
DW 16.800 usec  
DE 19.22 usec  
TE 295.0 K  
D1 3.00000000 sec  
D11 0.03000000 sec  
D12 0.00002000 sec  
D20 200.00000000 sec  
TD0 1

----- CHANNEL f1 -----  
SFO1 125.7716219 MHz  
NUC1 13C  
P1 11.00 usec  
P13 2000.00 usec  
P26 500.00 usec  
FLW1 63.00000000 W  
SPNAM[5] Crp60comp.4  
SFOAL5 0.500  
SPOFFS5 0 Hz  
SPW5 11.64700031 W  
SPNAM[8] Crp60,0.5,20.1  
SFOAL8 0.500  
SPOFFS8 0 Hz  
SPW8 11.64700031 W

----- CHANNEL f2 -----  
SFO2 500.1320005 MHz  
NUC2 1H  
CPDPRG[2] waltz65  
PCPD2 80.00 usec  
PLW2 14.00000000 W  
PLW12 0.31500000 W

F2 - Processing parameters  
SI 262144  
SF 125.7576124 MHz  
WDW EM  
SSB 0  
LB 2.00 Hz  
GB 0  
FC 1.40

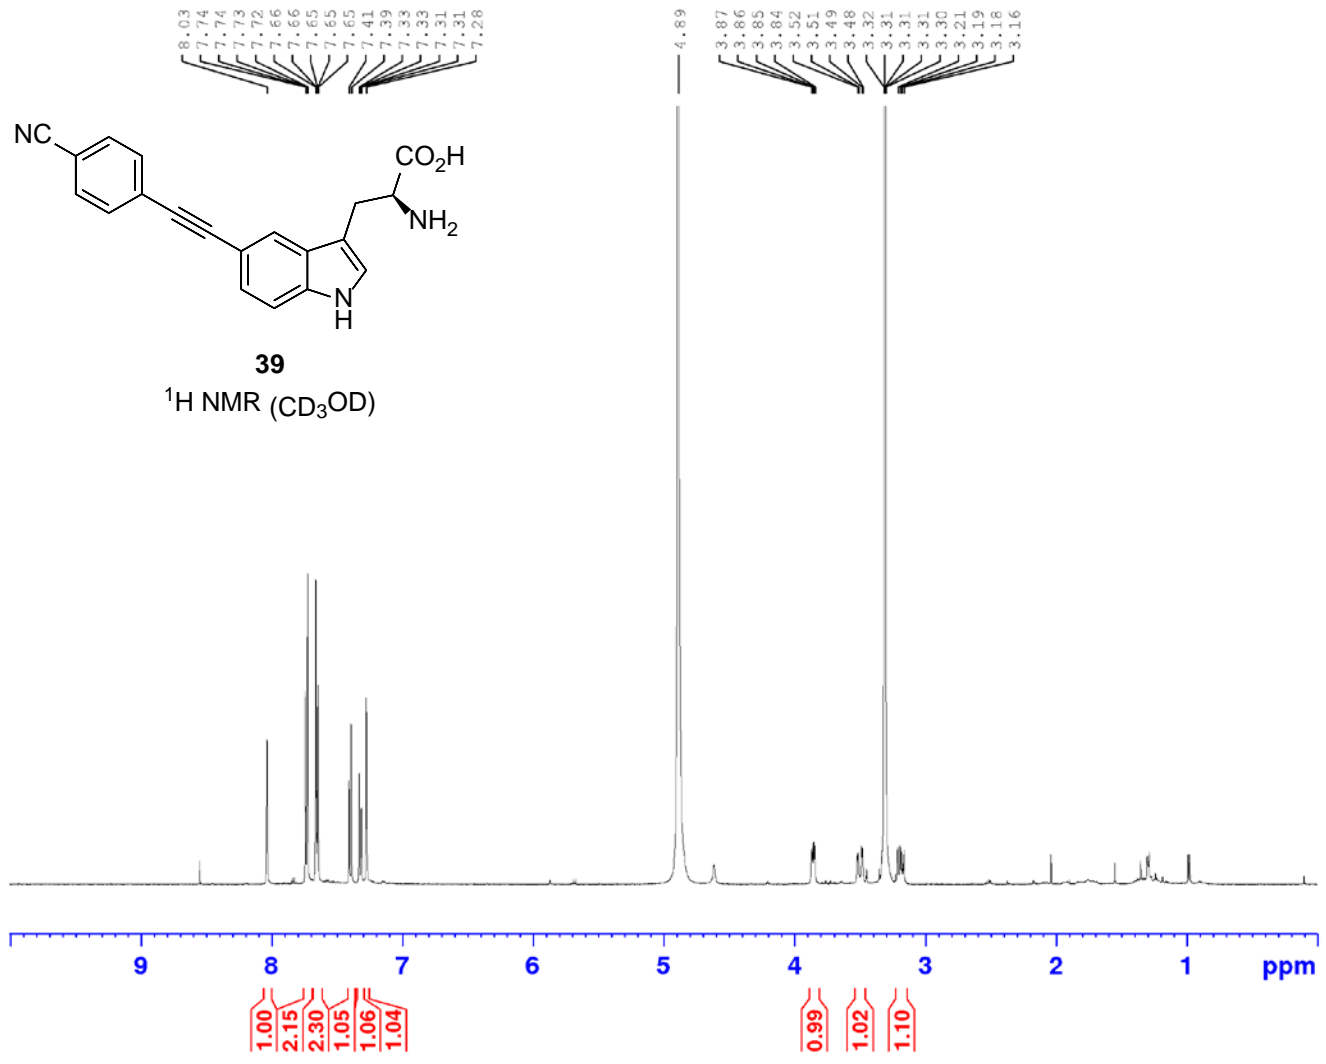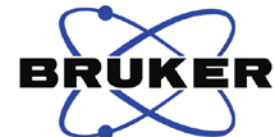

Current Data Parameters  
 NAME 03142016-29-rjmg-mc410-A  
 EXPNO 10  
 PROCNO 1

F2 - Acquisition Parameters  
 Date\_ 20160314  
 Time 19.09  
 INSTRUM spect  
 PROBHD 5 mm CPPBBO BB  
 PULPROG zg30  
 TD 65536  
 SOLVENT MeOD  
 NS 64  
 DS 2  
 SWH 7002.801 Hz  
 FIDRES 0.106254 Hz  
 AQ 4.6792703 sec  
 RG 57  
 DW 71.400 usec  
 DE 10.95 usec  
 TE 295.0 K  
 D1 1.00000000 sec  
 TD0 1

===== CHANNEL f1 =====  
 SFO1 500.1330008 MHz  
 NUC1 1H  
 P1 12.50 usec  
 PLW1 14.00000000 W

F2 - Processing parameters  
 SI 65536  
 SF 500.1300097 MHz  
 WDW EM  
 SSB 0  
 LB 0.30 Hz  
 GB 0  
 PC 1.00

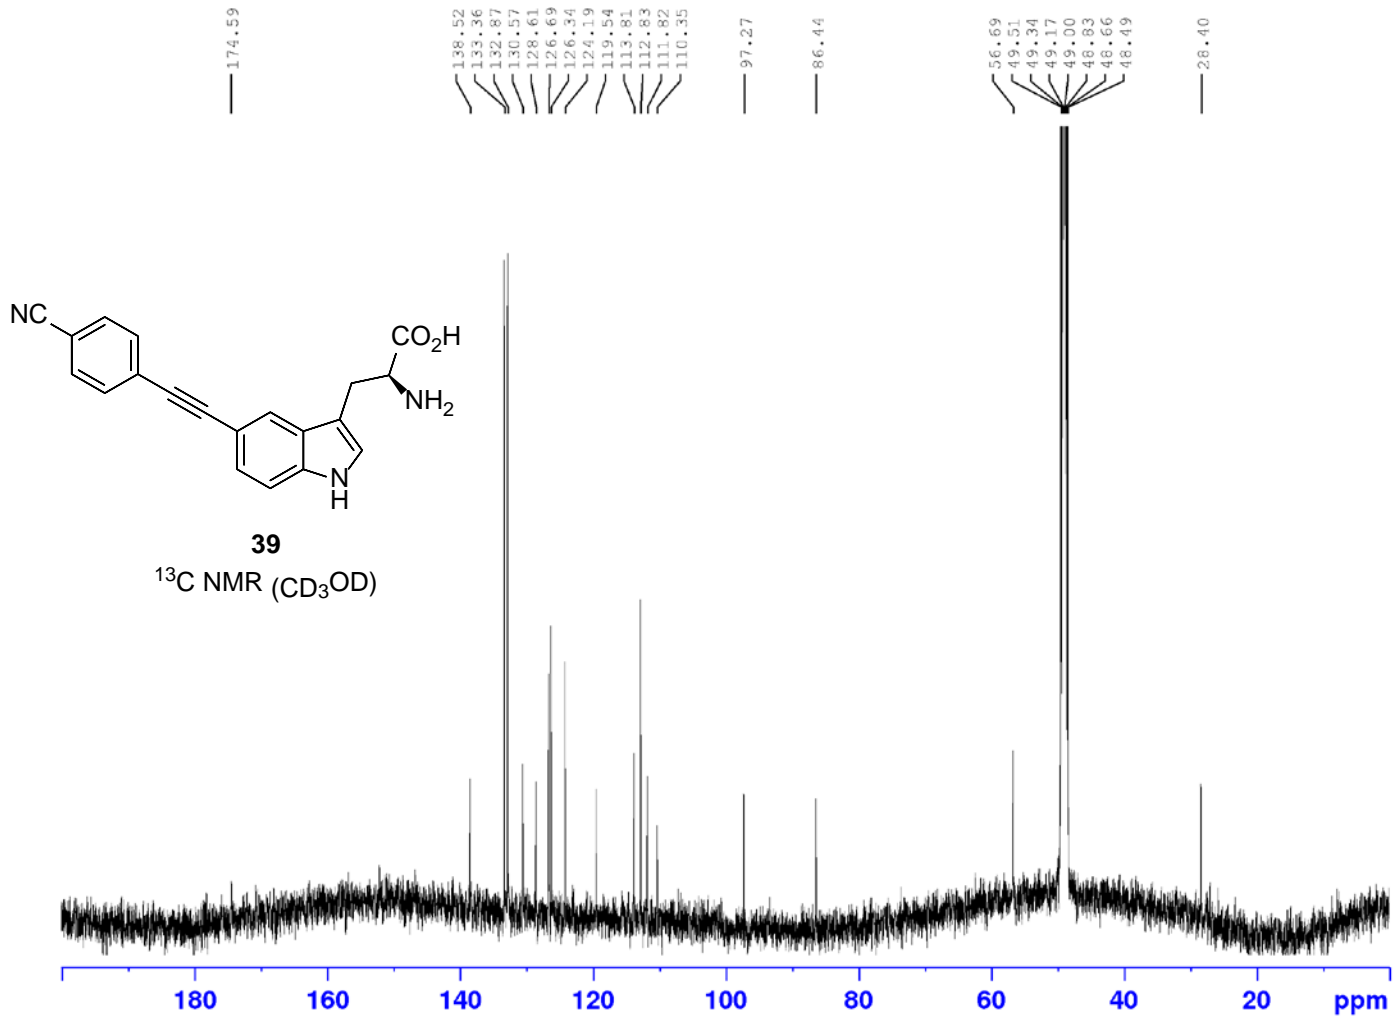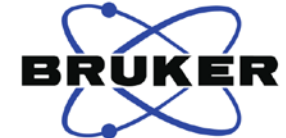

Current Data Parameters  
 NAME 03142016-29-rjmg-mc410-A  
 EXPNO 11  
 PROCNO 1

F2 - Acquisition Parameters  
 Date\_ 20160314  
 Time 20.53  
 INSTRUM spect  
 PROBHD 5 mm CPPBBO BB  
 PULPROG udefr  
 TD 21424  
 SOLVENT MeOD  
 NS 1600  
 DS 0  
 SWH 29761.904 Hz  
 FIDRES 1.389185 Hz  
 AQ 0.3599232 sec  
 RG 128  
 DW 16.800 usec  
 DE 19.22 usec  
 TE 295.0 K  
 D1 3.00000000 sec  
 D11 0.03000000 sec  
 D12 0.00002000 sec  
 D20 200.00000000 sec  
 TD0 1

----- CHANNEL f1 -----  
 SFO1 125.7716219 MHz  
 NUC1 13C  
 P1 11.00 usec  
 P13 2000.00 usec  
 P26 500.00 usec  
 PLW1 63.00000000 W  
 SFNAM[5] Crp60comp.4  
 SFOAL5 0.500  
 SPOFFS5 0 Hz  
 SPW5 11.64700031 W  
 SFNAM[8] Crp60,0.5,20.1  
 SFOAL8 0.500  
 SPOFFS8 0 Hz  
 SPW8 11.64700031 W

----- CHANNEL f2 -----  
 SFO2 500.1320005 MHz  
 NUC2 1H  
 CPDPRG[2] waltz65  
 PCPD2 80.00 usec  
 PLW2 14.00000000 W  
 PLW12 0.31500000 W

F2 - Processing parameters  
 SI 262144  
 SF 125.7576120 MHz  
 WDW EM  
 SSB 0  
 LB 2.00 Hz  
 GB 0  
 PC 1.40

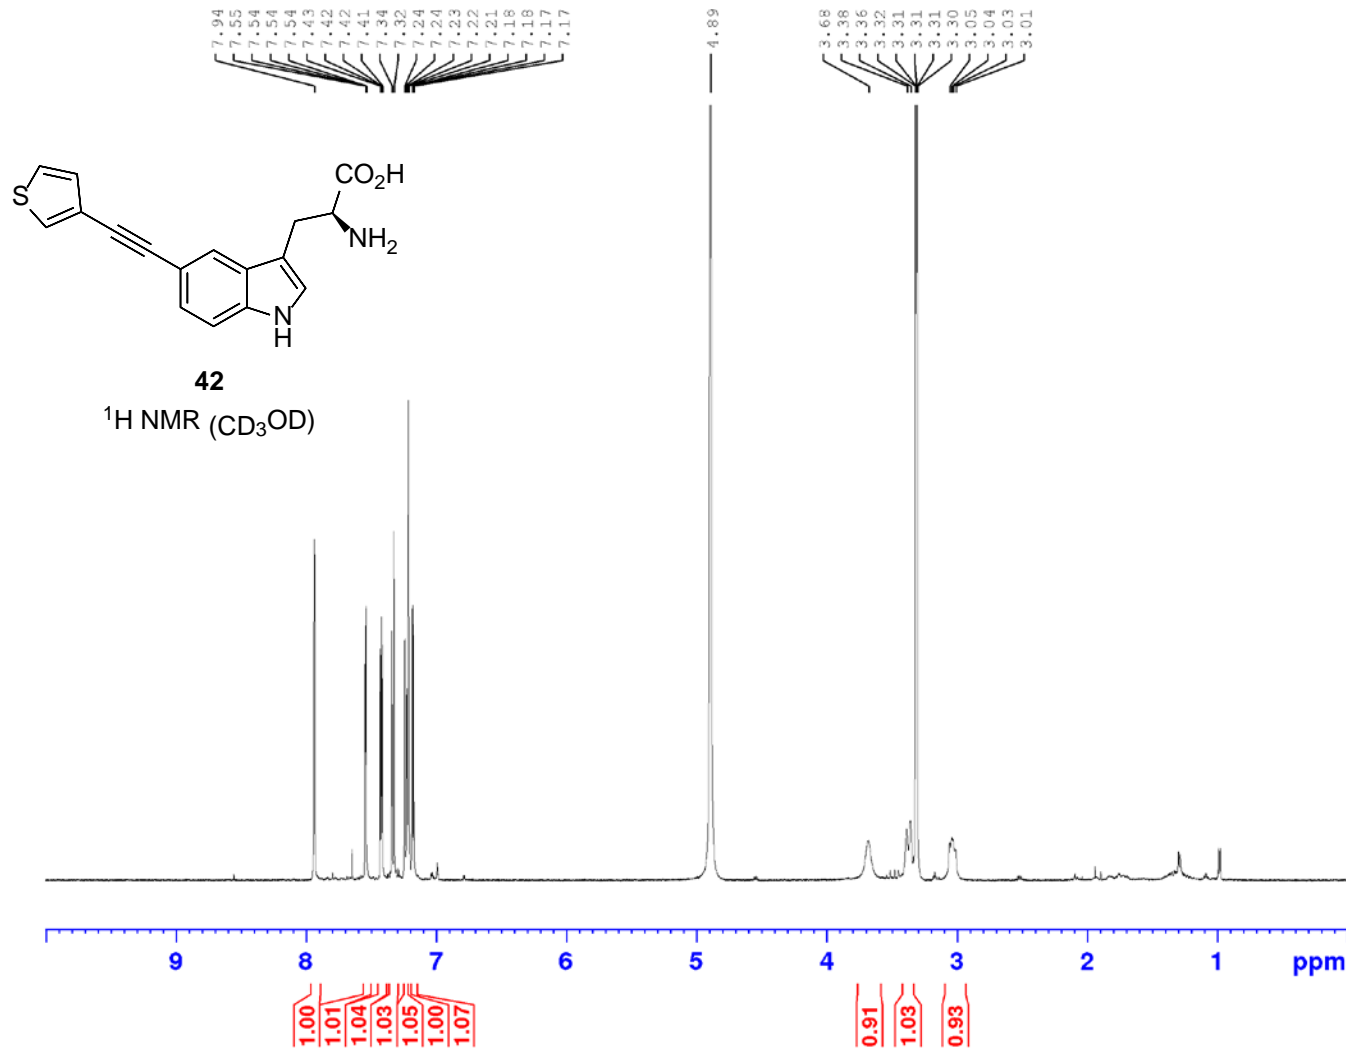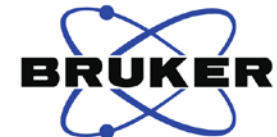

Current Data Parameters  
 NAME 03172016-32-rjmg-mc410-F  
 EXPNO 10  
 PROCNO 1

F2 - Acquisition Parameters  
 Date\_ 20160317  
 Time 19.05  
 INSTRUM spect  
 PROBHD 5 mm PABBO BB/  
 PULPROG zg30  
 TD 65536  
 SOLVENT MeOD  
 NS 8  
 DS 2  
 SWH 6996.269 Hz  
 FIDRES 0.106755 Hz  
 AQ 4.6836395 sec  
 RG 121.22  
 DW 71.467 usec  
 DE 11.38 usec  
 TE 295.0 K  
 D1 1.00000000 sec  
 TDO 1

===== CHANNEL f1 =====  
 SF01 499.9329996 MHz  
 NUC1 1H  
 P1 10.60 usec  
 PLW1 16.00000000 W

F2 - Processing parameters  
 SI 65536  
 SF 499.9300095 MHz  
 WDW EM  
 SSB 0  
 LB 0.30 Hz  
 GB 0  
 PC 1.00

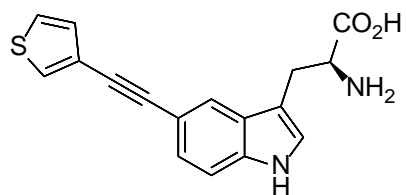

42

<sup>13</sup>C NMR (CD<sub>3</sub>OD)

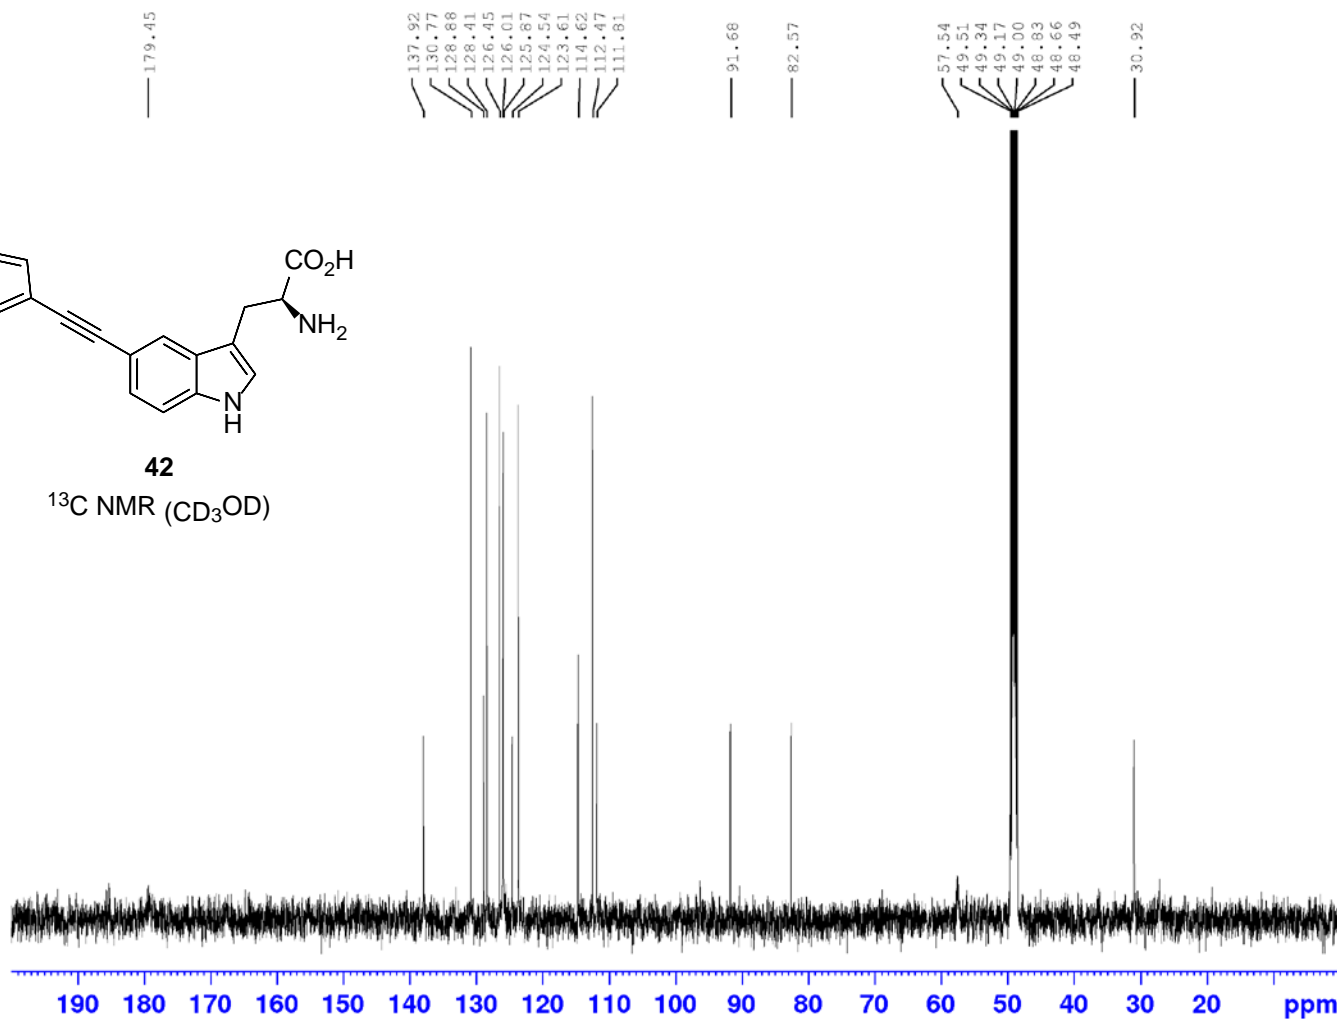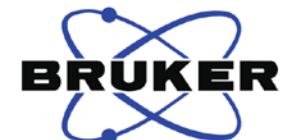

Current Data Parameters  
 NAME 03172016-32-rjmq-mc410-F  
 EXPNO 11  
 PROCNO 1

F2 - Acquisition Parameters  
 Date\_ 20160317  
 Time 20.49  
 INSTRUM spect  
 PROBHD 5 mm PABBO BB/  
 PULPROG udef  
 TD 21424  
 SOLVENT MeOD  
 NS 1600  
 DS 0  
 SWH 29761.904 Hz  
 FIDRES 1.389185 Hz  
 AQ 0.3599232 sec  
 RG 121.22  
 DW 16.800 usec  
 DE 9.36 usec  
 TE 295.0 K  
 D1 3.00000000 sec  
 D11 0.03000000 sec  
 D12 0.00002000 sec  
 D20 200.00000000 sec  
 TDO 1

----- CHANNEL f1 -----  
 SFO1 125.7213263 MHz  
 NUC1 13C  
 P1 10.00 usec  
 P13 2000.00 usec  
 P26 500.00 usec  
 PLW1 85.00000000 W  
 SFNAM[5] Crp60comp.4  
 SFOAL5 0.500  
 SPOFFS5 0 Hz  
 SPW5 12.98700047 W  
 SFNAM[8] Crp60,0.5,20.1  
 SFOAL8 0.500  
 SPOFFS8 0 Hz  
 SPW8 12.98700047 W

----- CHANNEL f2 -----  
 SFO2 499.9319997 MHz  
 NUC2 1H  
 CPDPRG[2] waltz65  
 PCPD2 80.00 usec  
 PLW2 16.00000000 W  
 PLW12 0.27563000 W

F2 - Processing parameters  
 SI 262144  
 SF 125.7073222 MHz  
 WDW EM  
 SSB 0  
 LB 2.00 Hz  
 GB 0  
 PC 1.40

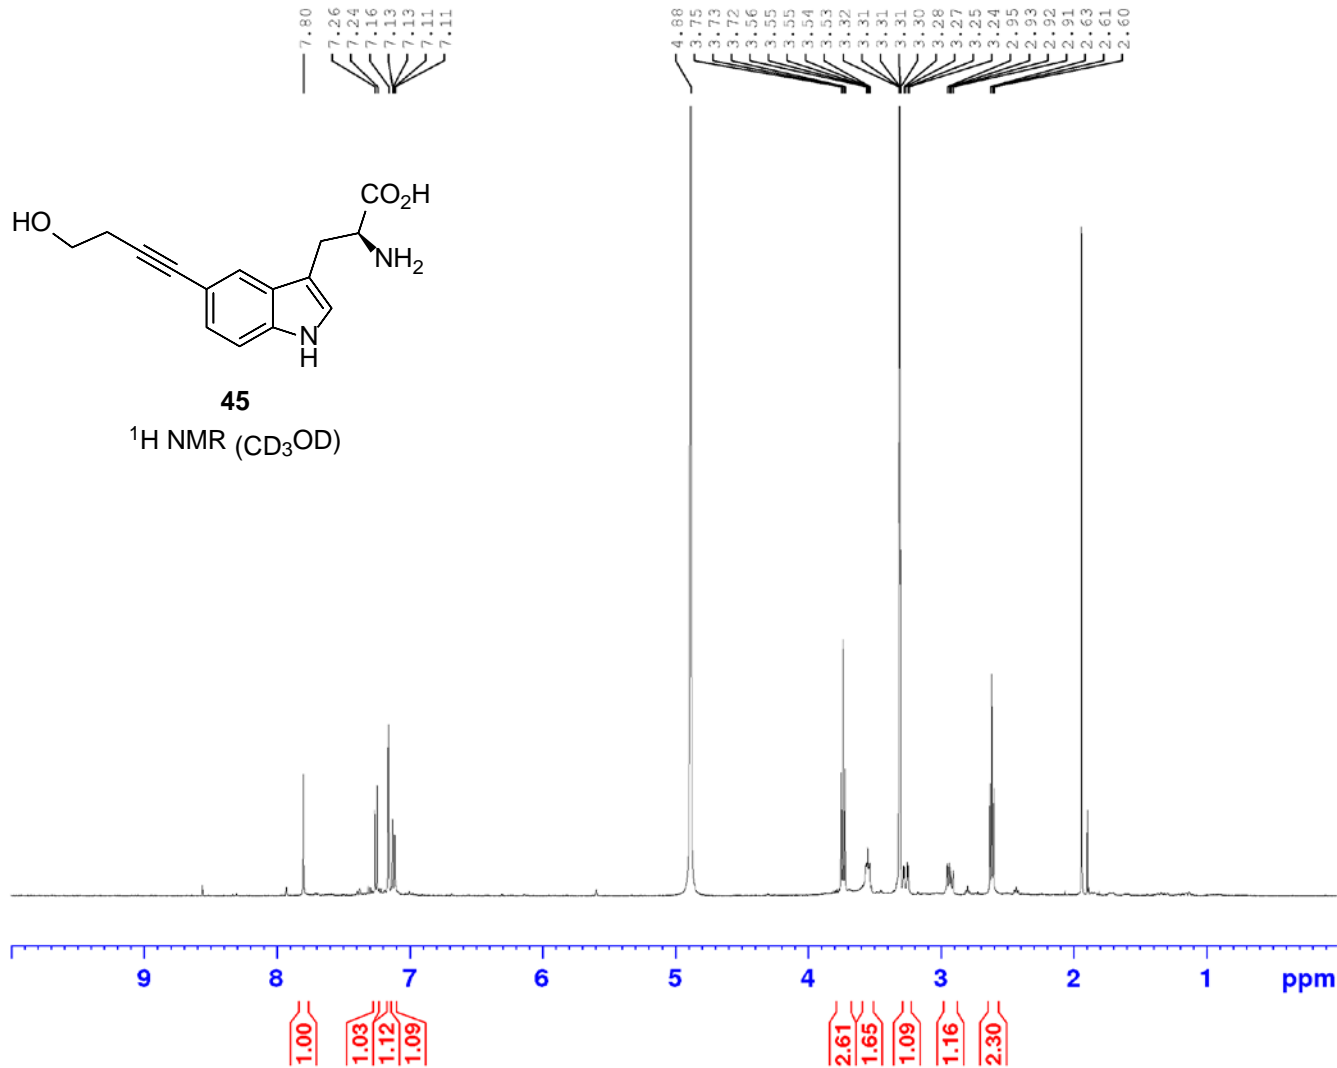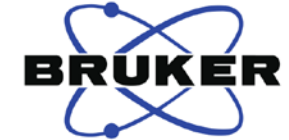

Current Data Parameters  
 NAME 02252015-18-rjmq-mc410-F  
 EXPNO 10  
 FROCNQ 1

F2 - Acquisition Parameters  
 Date\_ 20150225  
 Time 22.59  
 INSTRUM spect  
 PROBHD 5 mm PABBO BB/  
 PULPROG zg30  
 TD 65536  
 SOLVENT MeOD  
 NS 8  
 DS 2  
 SWH 6996.269 Hz  
 FIDRES 0.106755 Hz  
 AQ 4.6836395 sec  
 RG 121.22  
 DW 71.467 usec  
 DE 11.38 usec  
 TE 295.8 K  
 D1 1.00000000 sec  
 TD0 1

----- CHANNEL f1 -----  
 SF01 499.9329996 MHz  
 NUC1 1H  
 P1 10.60 usec  
 PLW1 16.00000000 W

F2 - Processing parameters  
 SI 65536  
 SF 499.9300097 MHz  
 WDW EM  
 SSB 0  
 LB 0.30 Hz  
 GB 0  
 PC 1.00

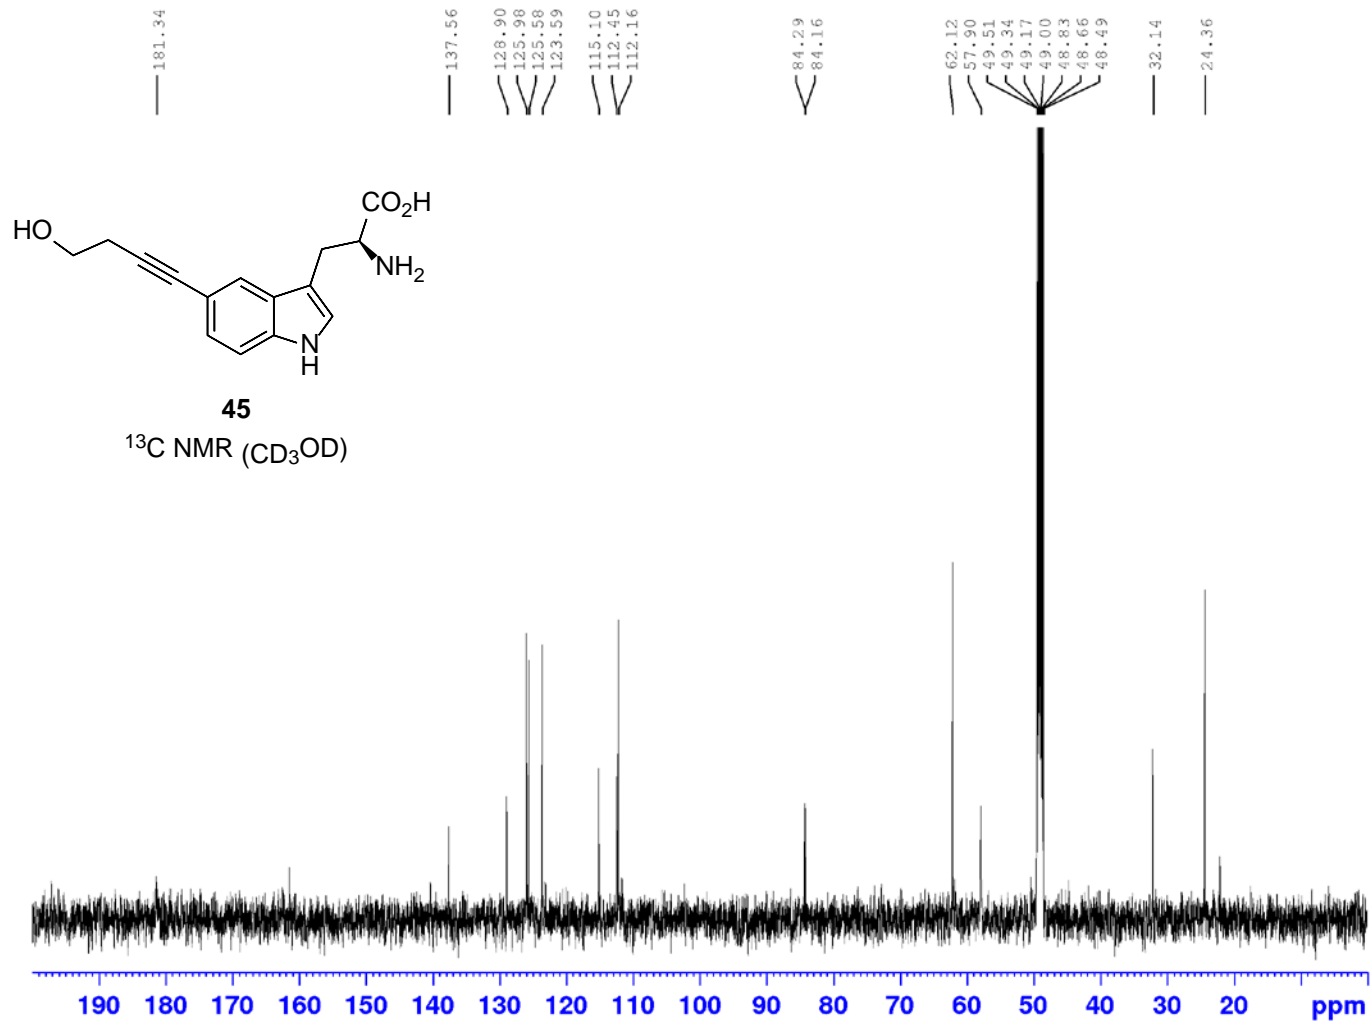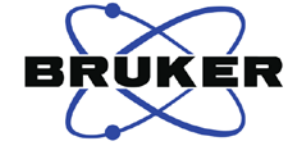

Current Data Parameters  
 NAME 02252015-18-rjmg-mc410-F  
 EXPNO 11  
 PROCNO 1

F2 - Acquisition Parameters  
 Date\_ 20150225  
 Time 23.54  
 INSTRUM spect  
 PROBHD 5 mm PABBO BB/  
 PULPROG udeflt  
 ID 21424  
 SOLVENT MeCD  
 NS 800  
 DS 0  
 SWH 29761.904 Hz  
 FIDRES 1.389185 Hz  
 AQ 0.3599232 sec  
 RG 121.22  
 DW 16.800 usec  
 DE 9.36 usec  
 TE 297.0 K  
 D1 3.00000000 sec  
 D11 0.03000000 sec  
 D12 0.00002000 sec  
 D20 200.00000000 sec  
 TDC 1

===== CHANNEL f1 =====  
 SFO1 125.7213263 MHz  
 NUC1 13C  
 P1 10.00 usec  
 P13 2000.00 usec  
 P26 500.00 usec  
 PLW1 85.00000000 W  
 SPNAM[5] Crp60comp.4  
 SPOAL5 0.500  
 SPOFFS5 0 Hz  
 SPW5 12.98700047 W  
 SPNAM[8] Crp60,0.5,20.1  
 SPOAL8 0.500  
 SPOFFS8 0 Hz  
 SPW8 12.98700047 W

===== CHANNEL f2 =====  
 SFO2 499.9319997 MHz  
 NUC2 1H  
 CPDPRG[2] waltz65  
 PCPD2 80.00 usec  
 PLW2 16.00000000 W  
 PLW12 0.27563000 W

F2 - Processing parameters  
 SI 262144  
 SF 125.7073225 MHz  
 WDW EM  
 SSB 0  
 LB 2.00 Hz  
 GB 0  
 PC 1.40

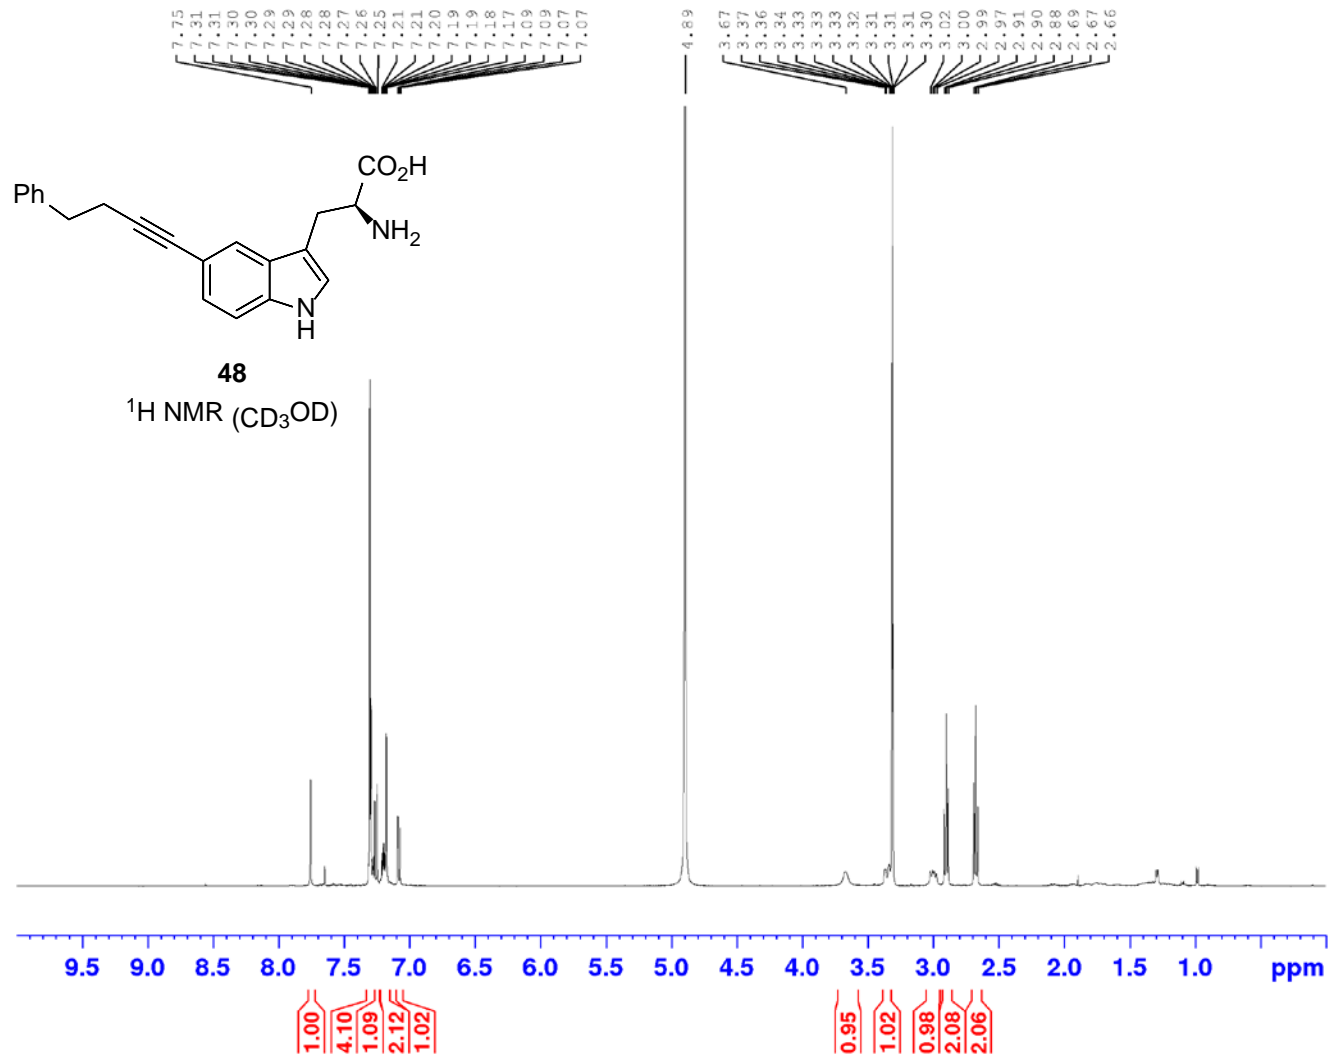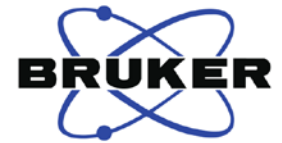

Current Data Parameters  
 NAME 01202016-5-rjmg-mc410-F  
 EXPNO 10  
 PROCNO 1

F2 - Acquisition Parameters  
 Date\_ 20160120  
 Time 19.04  
 INSTRUM spect  
 PROBHD 5 mm PABBO BB/  
 PULPROG zg30  
 TD 65536  
 SOLVENT MeOD  
 NS 8  
 DS 2  
 SWH 6996.269 Hz  
 FIDRES 0.106755 Hz  
 AQ 4.6836395 sec  
 RG 121.22  
 DW 71.467 usec  
 DE 11.38 usec  
 TE 295.0 K  
 D1 1.00000000 sec  
 TD0 1

----- CHANNEL f1 -----  
 SF01 499.9329996 MHz  
 NUC1 1H  
 P1 10.60 usec  
 PLW1 16.00000000 W

F2 - Processing parameters  
 SI 65536  
 SF 499.9300096 MHz  
 WDW EM  
 SSB 0  
 LB 0.30 Hz  
 GB 0  
 PC 1.00



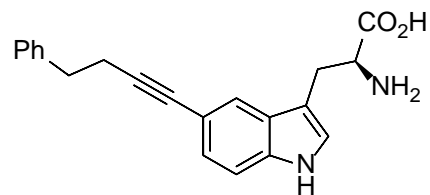

**48**  
<sup>13</sup>C NMR (CD<sub>3</sub>OD)

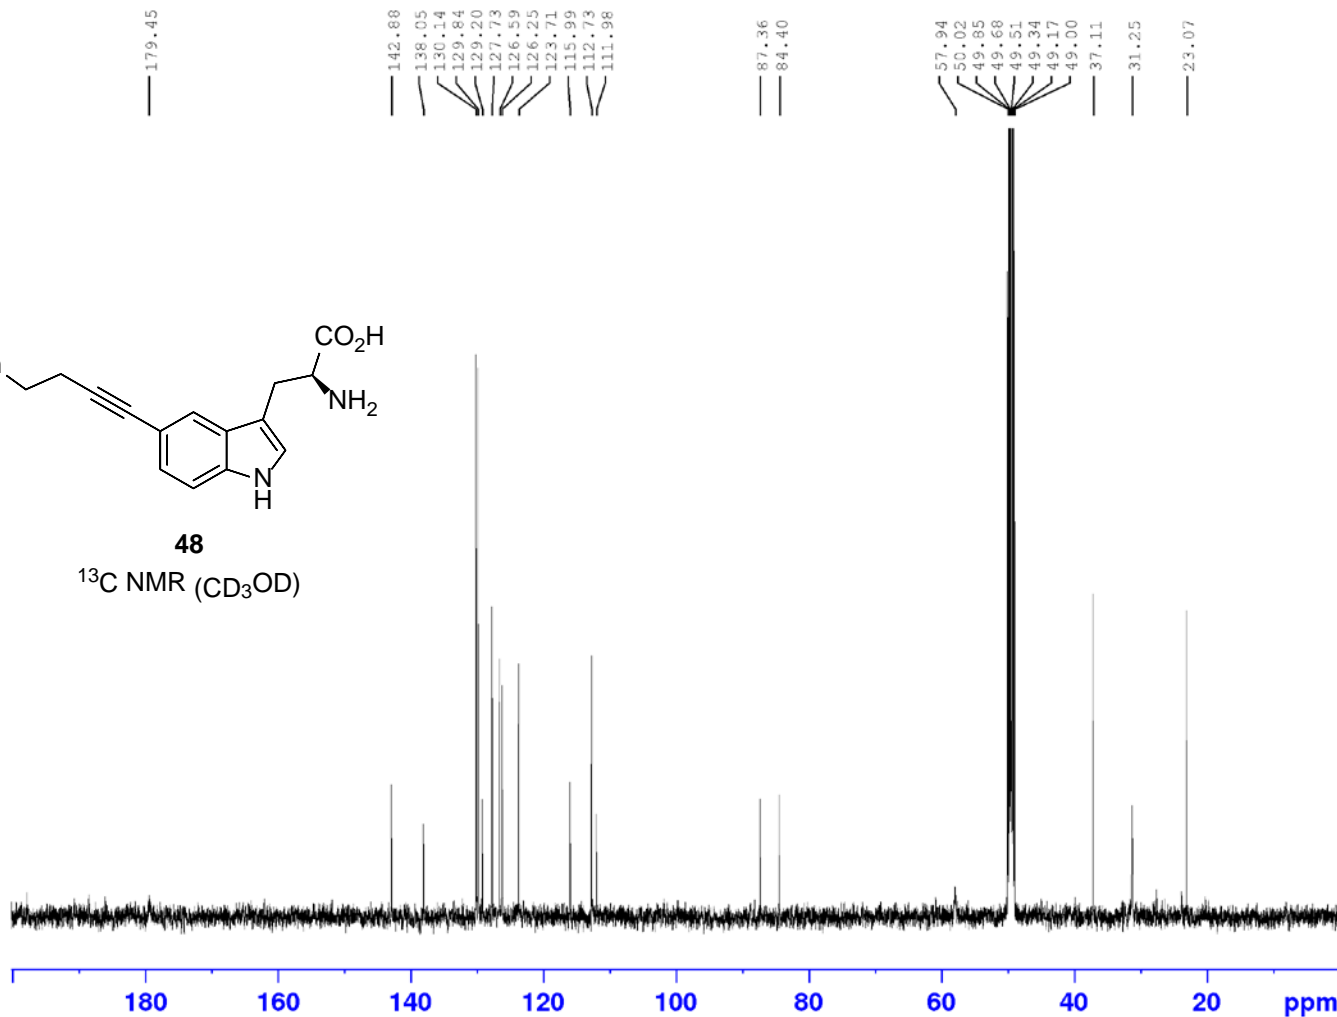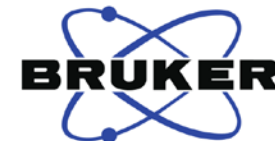

Current Data Parameters  
 NAME 01202016-5-rjmg-mc410-F  
 EXPNO 11  
 PROCNO 1

F2 - Acquisition Parameters  
 Date\_ 20160120  
 Time 19.59  
 INSTRUM spect  
 PROBHD 5 mm PABBO BB/  
 PULPROG udef  
 TD 21424  
 SOLVENT MeOD  
 NS 800  
 DS 0  
 SWH 29761.904 Hz  
 FIDRES 1.389185 Hz  
 AQ 0.3599232 sec  
 RG 121.22  
 DW 16.800 usec  
 DE 9.36 usec  
 TE 295.0 K  
 D1 3.00000000 sec  
 D11 0.03000000 sec  
 D12 0.00002000 sec  
 D20 200.00000000 sec  
 TD0 1

----- CHANNEL f1 -----  
 SFO1 125.7213263 MHz  
 NUC1 13C  
 P1 10.00 usec  
 P13 2000.00 usec  
 P26 500.00 usec  
 PLW1 85.00000000 W  
 SFNAM[5] Crp60comp.4  
 SFOAL5 0.500  
 SPOFFS5 0 Hz  
 SPW5 12.98700047 W  
 SFNAM[8] Crp60,0.5,20.1  
 SFOAL8 0.500  
 SPOFFS8 0 Hz  
 SPW8 12.98700047 W

----- CHANNEL f2 -----  
 SFO2 499.9319997 MHz  
 NUC2 1H  
 CPDPRG[2] waltz65  
 PCPD2 80.00 usec  
 PLW2 16.00000000 W  
 PLW12 0.27563000 W

F2 - Processing parameters  
 SI 262144  
 SF 125.7072585 MHz  
 WDW EM  
 SSB 0  
 LB 2.00 Hz  
 GB 0  
 PC 1.40

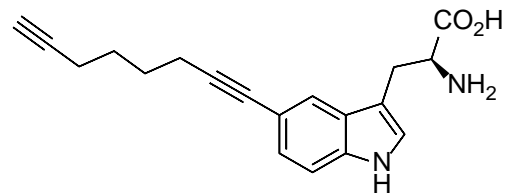

**51**  
<sup>1</sup>H NMR (CD<sub>3</sub>OD)

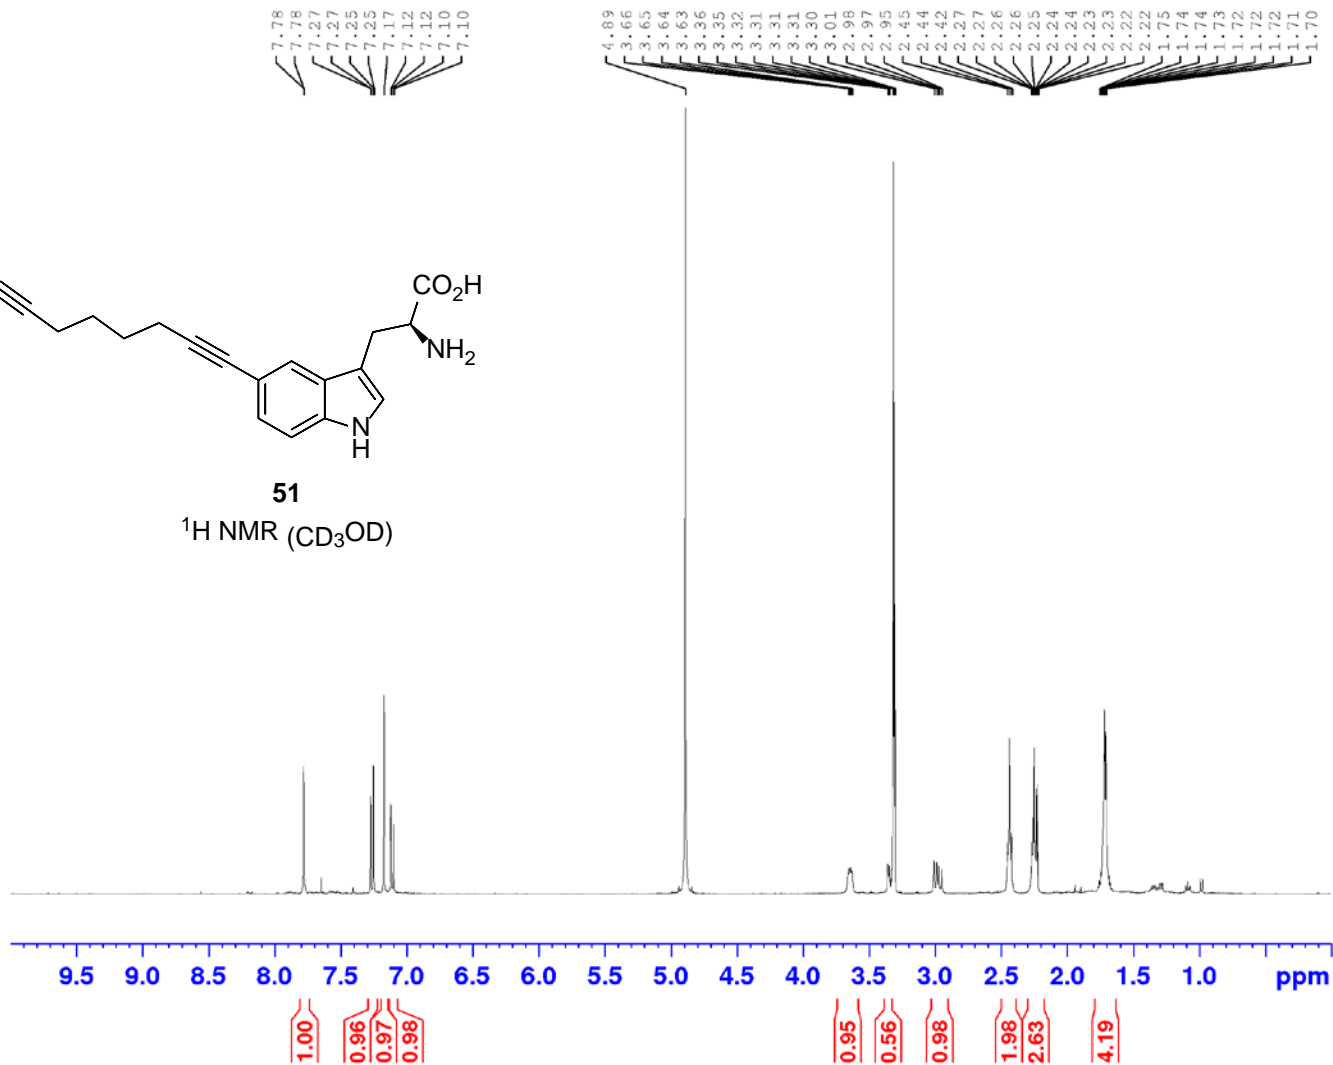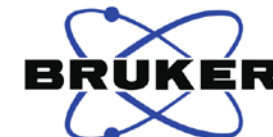

Current Data Parameters  
 NAME 07142015-11-rjmg-mc410-M  
 EXPNO 10  
 PROCNO 1

F2 - Acquisition Parameters  
 Date\_ 20150714  
 Time 22.42  
 INSTRUM AVII400  
 PROBHD 5 mm PABBO BB/  
 PULPROG zg30  
 TD 65536  
 SOLVENT MeOD  
 NS 8  
 DS 2  
 SWE 5605.381 Hz  
 FIDRES 0.085531 Hz  
 AQ 5.8458114 sec  
 RG 128  
 DW 89.200 usec  
 DE 13.44 usec  
 TE 294.9 K  
 D1 1.00000000 sec  
 TD0 1

----- CHANNEL f1 -----  
 SFO1 400.1324008 MHz  
 NUC1 1H  
 P1 15.50 usec  
 PLW1 12.00000000 W

F2 - Processing parameters  
 SI 65536  
 SF 400.1300079 MHz  
 WDW EM  
 SSB 0  
 LB 0.30 Hz  
 GB 0  
 PC 1.00

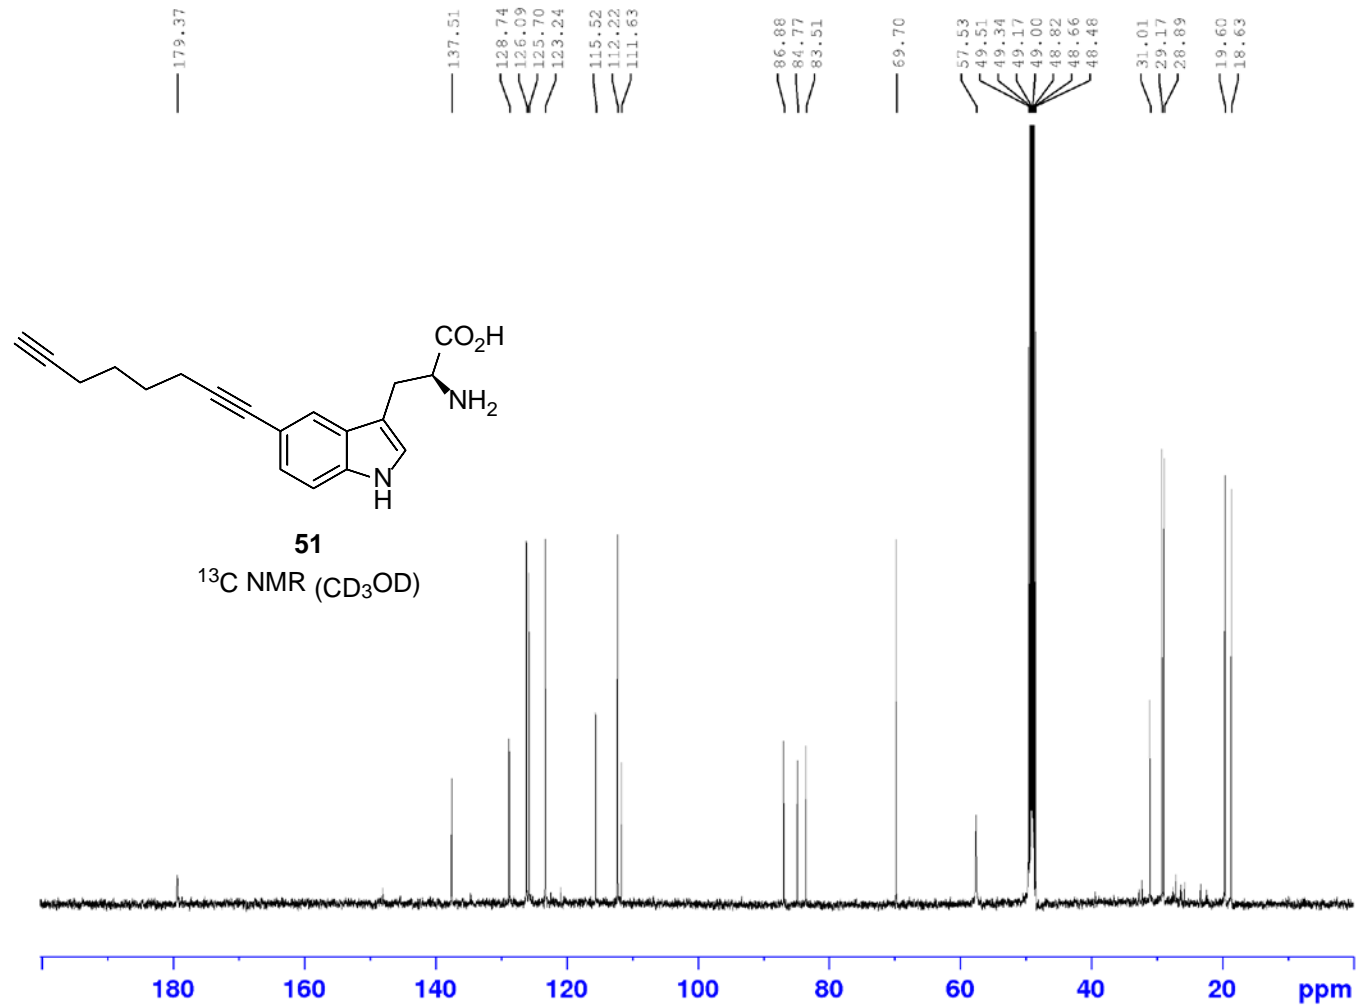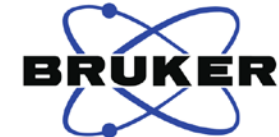

Current Data Parameters  
 NAME 07132015-11-rjmg-mc410-A  
 EXPNO 10  
 PROCNO 1

F2 - Acquisition Parameters  
 Date\_ 20150713  
 Time 21.04  
 INSTRUM spect  
 PROBHD 5 mm CFPBBO BB  
 PULPROG udeft  
 TD 21424  
 SOLVENT MeOD  
 NS 400  
 DS 0  
 SWH 29761.904 Hz  
 FIDRES 1.389185 Hz  
 AQ 0.3599232 sec  
 RG 128  
 DW 16.800 usec  
 DE 19.86 usec  
 TE 295.0 K  
 D1 3.00000000 sec  
 D11 0.03000000 sec  
 D12 0.00002000 sec  
 D20 200.00000000 sec  
 TD0 1

----- CHANNEL f1 -----  
 SFO1 125.7716219 MHz  
 NUC1 13C  
 P1 10.00 usec  
 P13 2000.00 usec  
 P26 500.00 usec  
 PLW1 68.00000000 W  
 SPNAM[5] Crp60comp.4  
 SFOALS 0.500  
 SFOFFS5 0 Hz  
 SPW5 10.39000034 W  
 SPNAM[8] Crp60,0.5,20.1  
 SFOALS 0.500  
 SFOFFS8 0 Hz  
 SPW8 10.39000034 W

----- CHANNEL f2 -----  
 SFO2 500.1320005 MHz  
 NUC2 1H  
 CPDPRG[2] waltz65  
 PCPD2 80.00 usec  
 PLW2 15.00000000 W  
 PLW12 0.32633999 W

F2 - Processing parameters  
 SI 262144  
 SF 125.7576133 MHz  
 WDW EM  
 SSB 0  
 LB 2.00 Hz  
 GB 0  
 PC 1.40

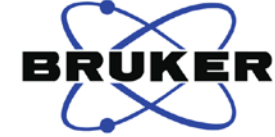

Current Data Parameters  
NAME 03182D16-14-rjmg-mc410-F  
EXFNO 10  
PROCNO 1

F2 - Acquisition Parameters  
Date\_ 20160318  
Time 21.11  
INSTRUM spect  
PROBHD 5 mm PABBO BB/  
PULPROG zg30  
TD 65536  
SOLVENT MeOD  
NS 8  
DS 2  
SWH 6996.269 Hz  
FIDRES 0.106755 Hz  
AQ 4.6836395 sec  
RG 121.22  
DW 71.467 usec  
DE 11.38 usec  
TE 295.0 K  
D1 1.00000000 sec  
TDO 1

===== CHANNEL f1 =====  
SFO1 499.9329996 MHz  
NUC1 1H  
P1 10.60 usec  
PLW1 16.00000000 W

F2 - Processing parameters  
SI 65536  
SF 499.9300095 MHz  
WDW EM  
SSB 0  
LB 0.30 Hz  
GB 0  
PC 1.00

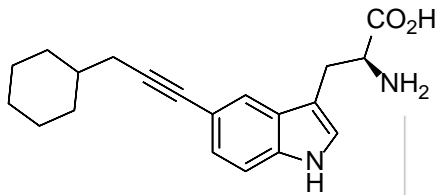

54

<sup>1</sup>H NMR (CD<sub>3</sub>OD)

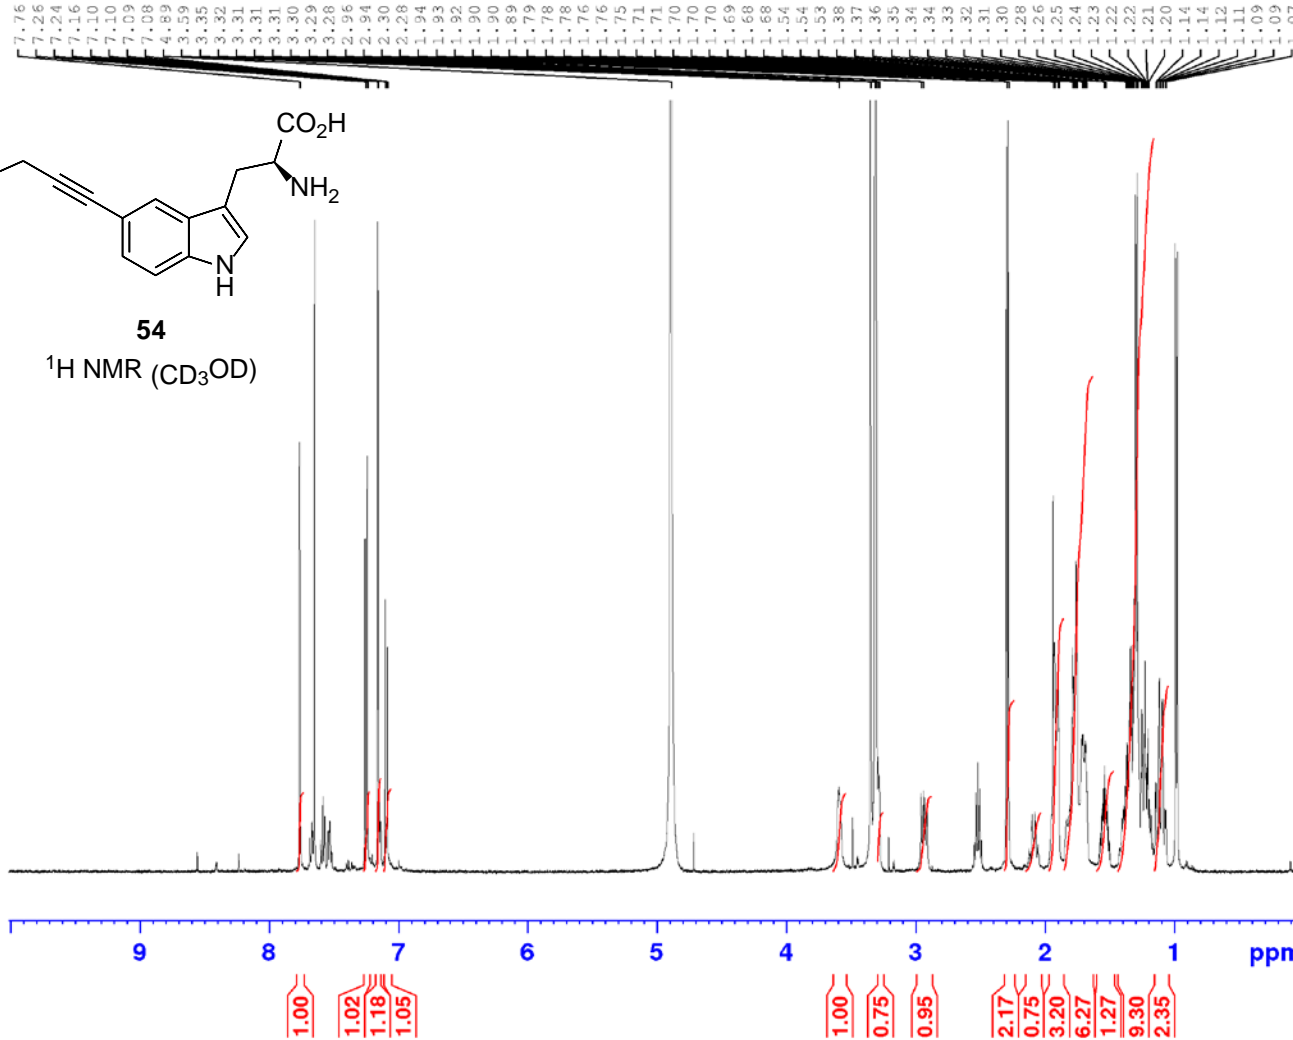

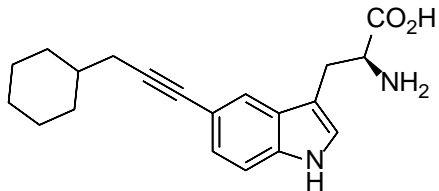

**54**  
<sup>13</sup>C NMR (CD<sub>3</sub>OD)

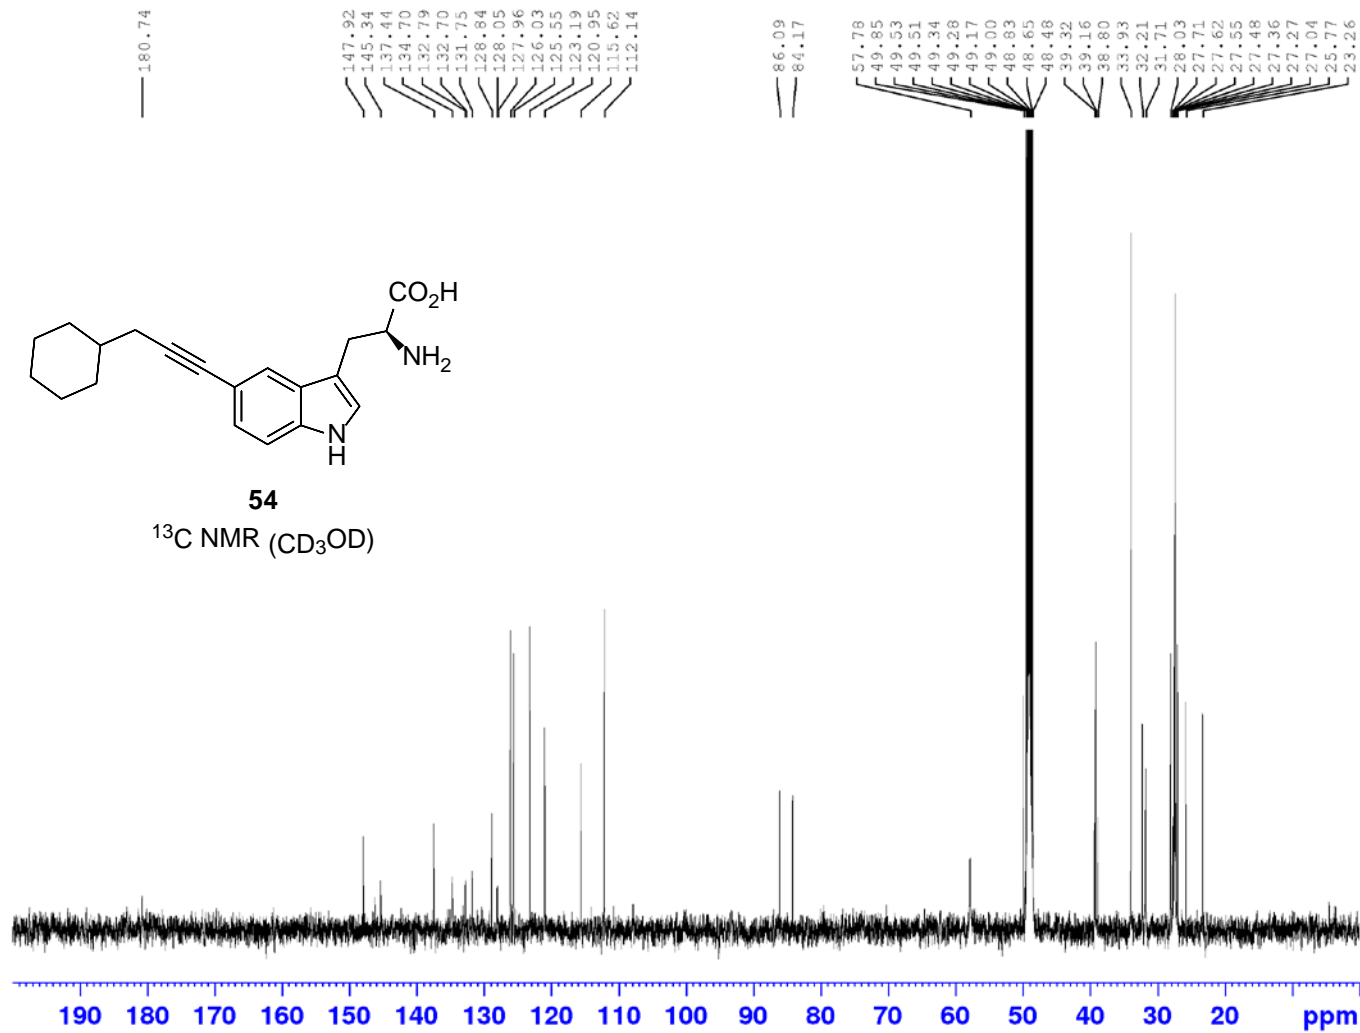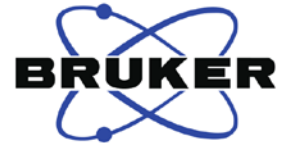

Current Data Parameters  
 NAME 03182016-14-rjmg-mc410-F  
 EXPNO 11  
 PROCNO 1

F2 - Acquisition Parameters  
 Date\_ 20160318  
 Time 23.20  
 INSTRUM spect  
 PROBHD 5 mm FAPBO BB/  
 PULPROG udef2  
 TD 21424  
 SOLVENT MeOD  
 NS 2000  
 DS 0  
 SWH 29761.904 Hz  
 FIDRES 1.389185 Hz  
 AQ 0.3599232 sec  
 RG 121.22  
 DW 16.800 usec  
 DE 9.36 usec  
 TE 295.0 K  
 D1 3.00000000 sec  
 D11 0.03000000 sec  
 D12 0.00002000 sec  
 D20 200.00000000 sec  
 TD0 1

----- CHANNEL f1 -----  
 SFO1 125.7213263 MHz  
 NUC1 13C  
 P1 10.00 usec  
 P13 2000.00 usec  
 P26 500.00 usec  
 PLW1 85.00000000 W  
 SFNAM[5] Crp60comp.4  
 SFOAL5 0.500  
 SPOFFS5 0 Hz  
 SPW5 12.98700047 W  
 SFNAM[8] Crp60,0.5,20.1  
 SFOAL8 0.500  
 SPOFFS8 0 Hz  
 SPW8 12.98700047 W

----- CHANNEL f2 -----  
 SFO2 499.9319997 MHz  
 NUC2 1H  
 CPDPRG[2] waltz65  
 PCPD2 80.00 usec  
 PLW2 16.00000000 W  
 PLW12 0.27563000 W

F2 - Processing parameters  
 SI 262144  
 SF 125.7073227 MHz  
 WDW EM  
 SSB 0  
 LB 2.00 Hz  
 GB 0  
 PC 1.40

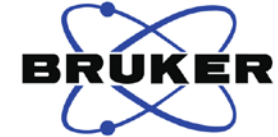

Current Data Parameters  
NAME 03182016-15-rjmg-mc410-F  
EXPNO 10  
PROCNO 1

F2 - Acquisition Parameters  
Date\_ 20160318  
Time 23.25  
INSTRUM spect  
PROBHD 5 mm PABBO BB/  
PULPROG zg30  
TD 65536  
SOLVENT MeOD  
NS 8  
DS 2  
SWH 6996.259 Hz  
FIDRES 0.106755 Hz  
AQ 4.6836395 sec  
RG 121.22  
DW 71.467 usec  
DE 11.38 usec  
TE 295.0 K  
D1 1.00000000 sec  
TDO 1

===== CHANNEL f1 =====  
SFO1 499.9329996 MHz  
NUC1 1H  
P1 10.60 usec  
PLW1 16.00000000 W

F2 - Processing parameters  
SI 65536  
SF 499.9300096 MHz  
WDW EM  
SSB 0  
LB 0.30 Hz  
GB 0  
FC 1.00

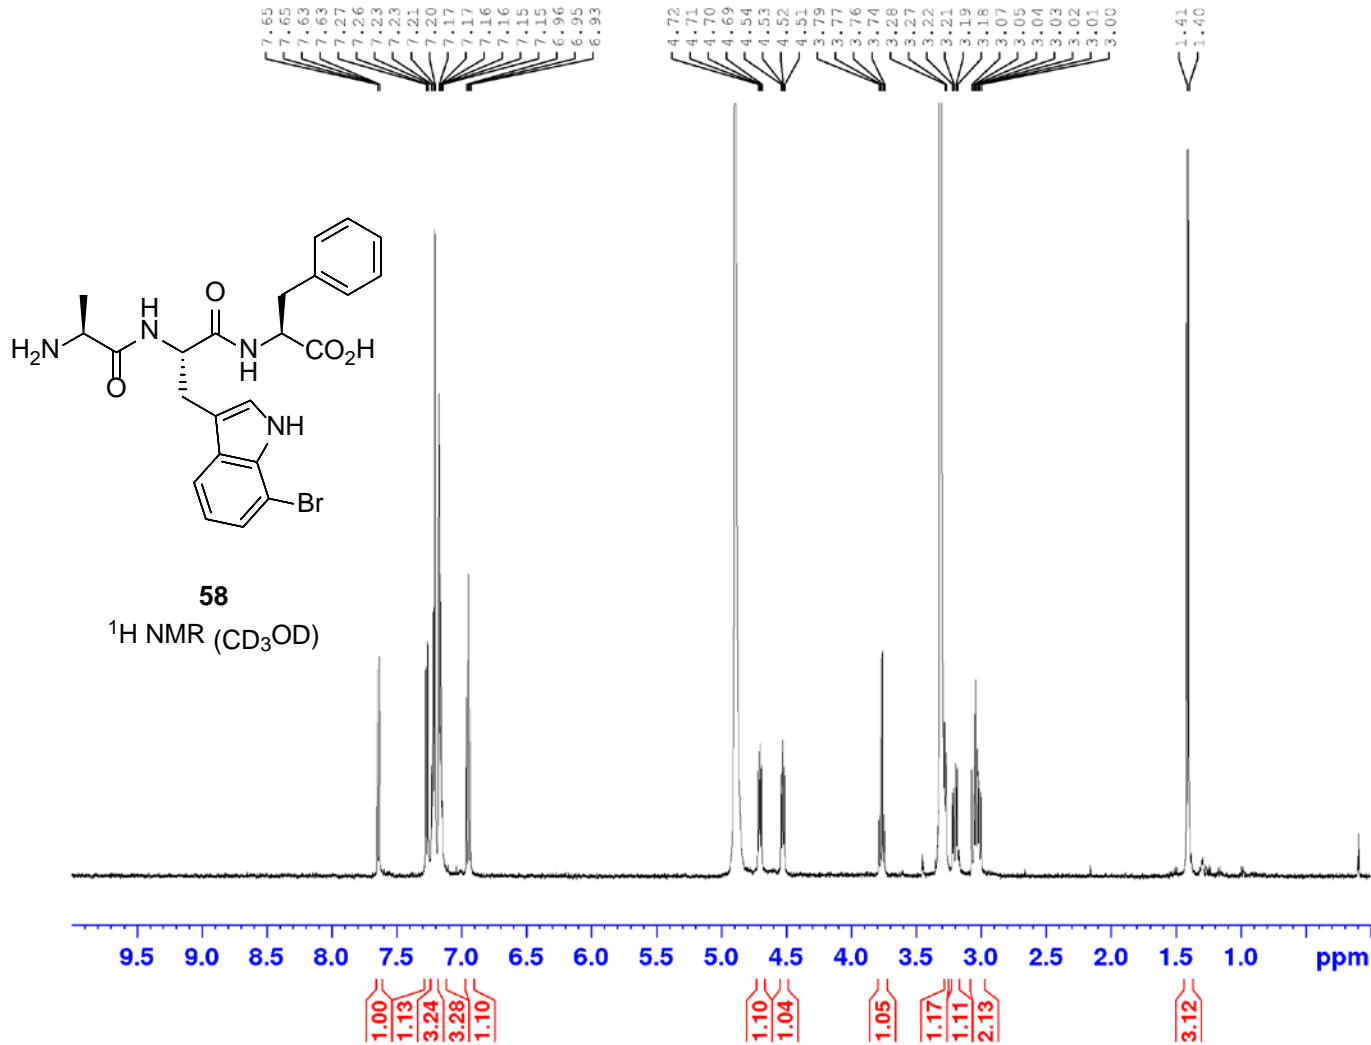

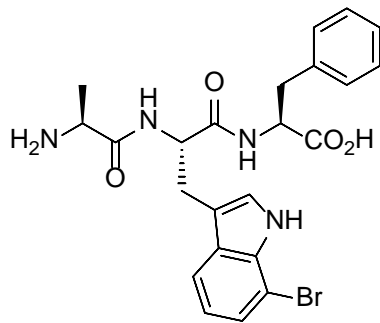

**58**  
<sup>13</sup>C NMR (CD<sub>3</sub>OD)

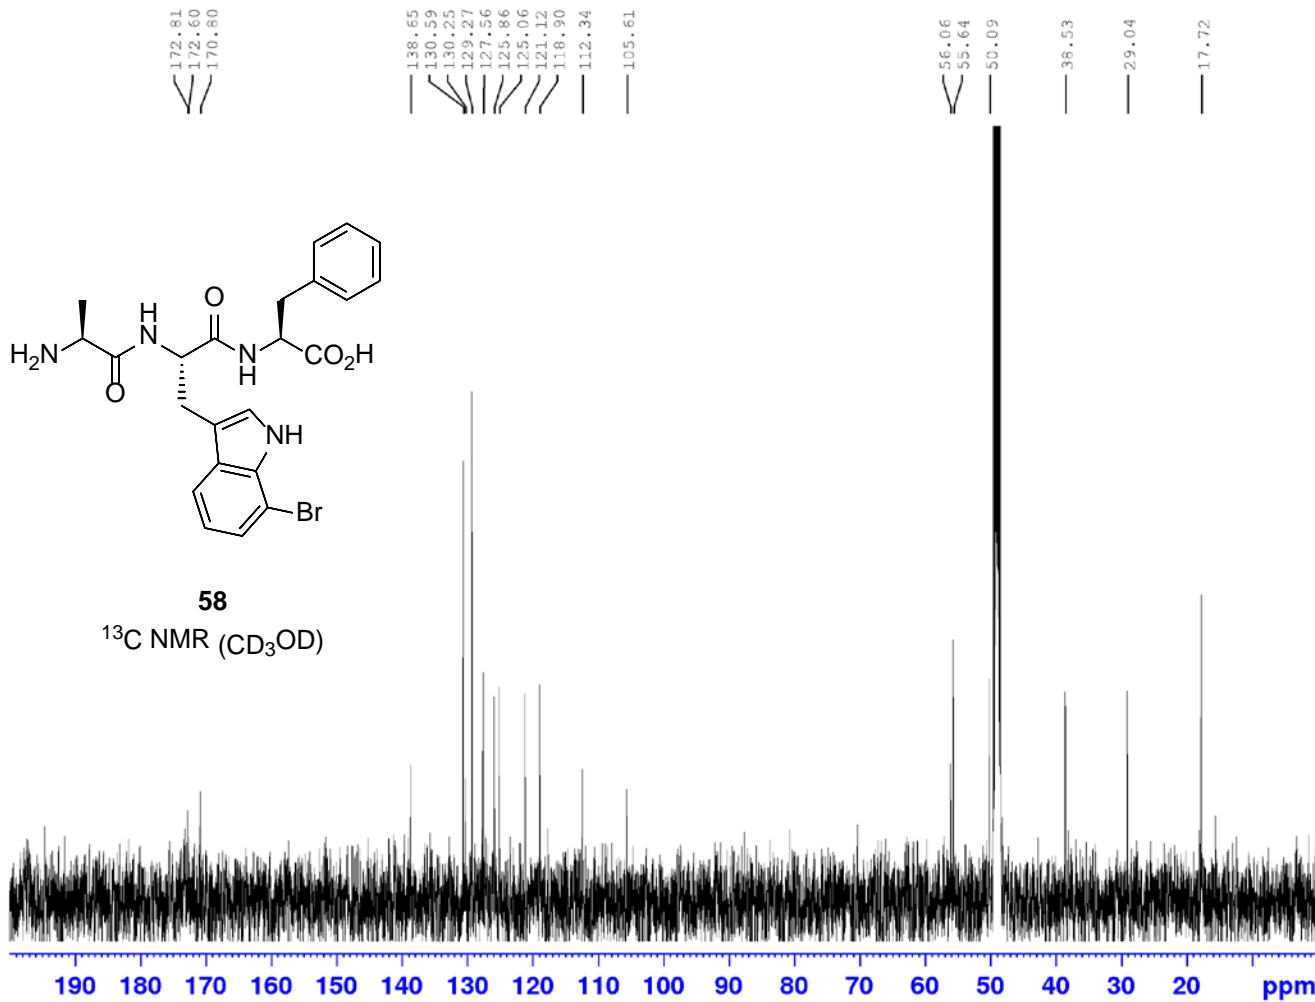

172.81  
 172.60  
 170.80

138.65  
 130.59  
 130.25  
 129.27  
 127.56  
 125.86  
 125.06  
 121.12  
 118.90  
 112.34  
 105.61

56.06  
 55.64  
 50.09  
 38.53  
 29.04  
 17.72



Current Data Parameters  
 NAME 03182016-15-rjmg-mc410-F  
 EXPNO 11  
 PROCNO 1

F2 - Acquisition Parameters  
 Date\_ 20160319  
 Time\_ 0.19  
 INSTRUM spect  
 PROBHD 5 mm PABBO BB/  
 PULPROG udef  
 TD 21424  
 SOLVENT MeOD  
 NS 800  
 DS 0  
 SWH 29761.904 Hz  
 FIDRES 1.389185 Hz  
 AQ 0.3599232 sec  
 RG 121.22  
 DW 16.800 usec  
 DE 9.36 usec  
 TE 295.0 K  
 D1 3.0000000 sec  
 D11 0.0300000 sec  
 D12 0.0000200 sec  
 D20 200.0000000 sec  
 TD0 1

===== CHANNEL f1 =====  
 SFO1 125.7213263 MHz  
 NUC1 13C  
 P1 10.00 usec  
 P13 2000.00 usec  
 P26 500.00 usec  
 PLW1 85.00000000 W  
 SPNAM[5] Crp60comp.4  
 SPCAL5 0.500  
 SPCFFS5 0 Hz  
 SPW5 12.98700047 W  
 SPNAM[8] Crp60,0.5,20.1  
 SPCAL8 0.500  
 SPCFFS8 0 Hz  
 SPW8 12.98700047 W

===== CHANNEL f2 =====  
 SFO2 499.9319997 MHz  
 NUC2 1H  
 CPDPRG[2] waltz65  
 PCPD2 80.00 usec  
 PLW2 16.00000000 W  
 PLW12 0.27563000 W

F2 - Processing parameters  
 SI 262144  
 SF 125.7073220 MHz  
 WDW EM  
 SSB 0  
 LB 2.00 Hz  
 GB 0  
 PC 1.40

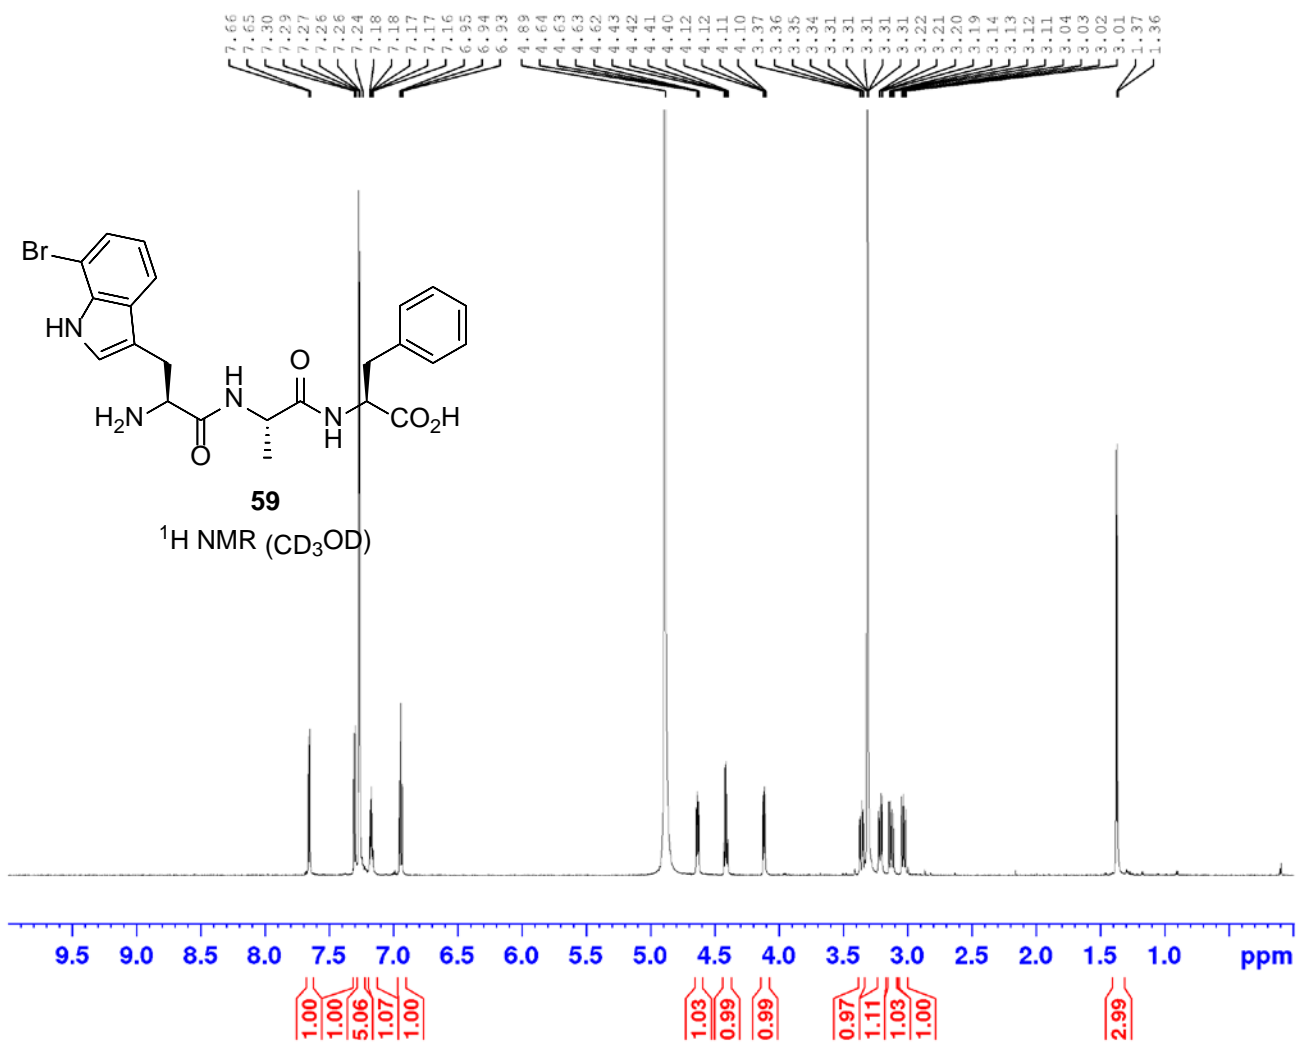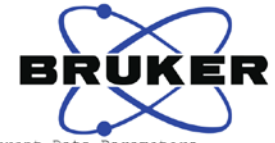

Current Data Parameters  
 NAME 03222016-11-rjmg-mc410-E  
 EXPNO 10  
 PROCNO 1

F2 - Acquisition Parameters  
 Date\_ 20160322  
 Time 16.49  
 INSTRUM spect  
 PROBHD 5 mm CPPTCI 1H  
 PULPROG zg30  
 ID 65536  
 SOLVENT MeOD  
 NS 4  
 DS 2  
 SWH 9803.922 Hz  
 FIDRES 0.149596 Hz  
 AQ 3.3423359 sec  
 RG 111.35  
 DW 51.000 usec  
 DE 59.79 usec  
 TE 295.0 K  
 D1 1.00000000 sec  
 TD0 1

==== CHANNEL f1 =====  
 SFO1 700.1342008 MHz  
 NUC1 1H  
 P1 8.00 usec  
 PLW1 15.30000019 W

F2 - Processing parameters  
 SI 65536  
 SF 700.1300134 MHz  
 WDW EM  
 SSB 0  
 LB 0.30 Hz  
 GB 0  
 PC 1.00



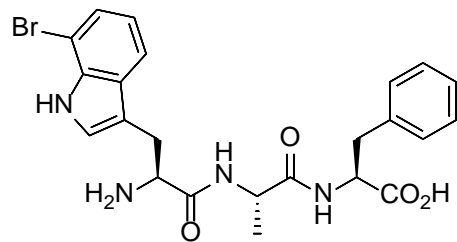

59

<sup>13</sup>C NMR (CD<sub>3</sub>OD)

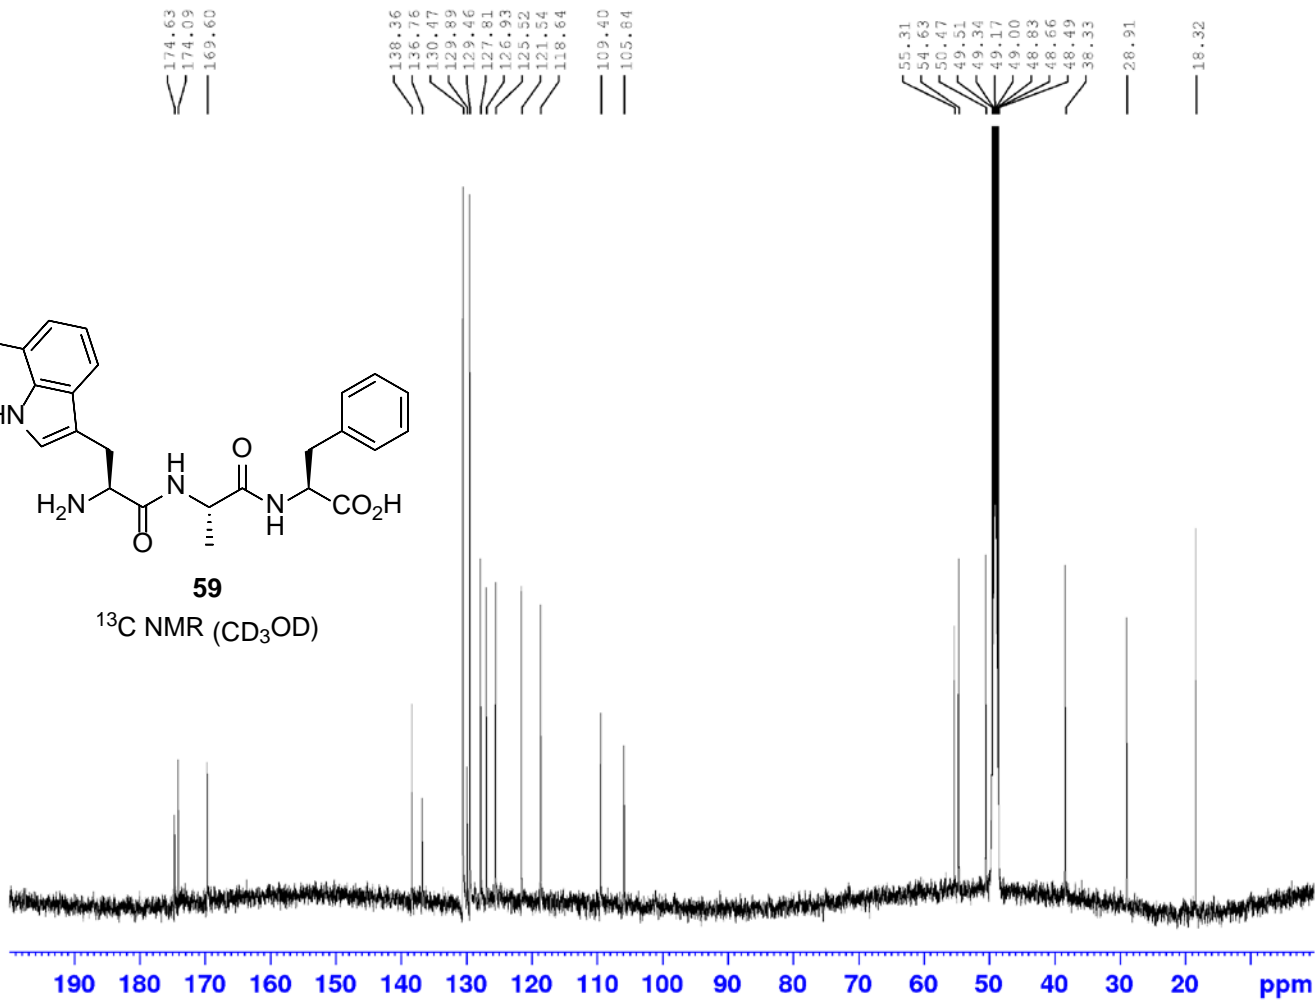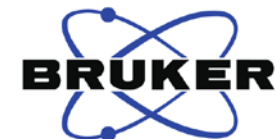

Current Data Parameters  
 NAME 03232016-11-rjmg-mc410-A  
 EXPNO 11  
 PROCNO 1

F2 - Acquisition Parameters  
 Date\_ 20160323  
 Time 21.48  
 INSTRUM spect  
 PROBHD 5 mm CPPBBO BB  
 PULPROG udefr  
 TD 21424  
 SOLVENT MeOD  
 NS 1600  
 DS 0  
 SWH 29761.904 Hz  
 FIDRES 1.389185 Hz  
 AQ 0.3599232 sec  
 RG 128  
 DW 16.800 usec  
 DE 19.22 usec  
 TE 295.0 K  
 D1 3.0000000 sec  
 D11 0.0300000 sec  
 D12 0.0000200 sec  
 D20 200.0000000 sec  
 TDC 1

----- CHANNEL f1 -----  
 SFO1 125.7716219 MHz  
 NUC1 13C  
 P1 11.00 usec  
 P13 2000.00 usec  
 P26 500.00 usec  
 PLW1 63.0000000 W  
 SPNAM[5] Crp60comp.4  
 SPOAL5 0.500  
 SPOFFS5 0 Hz  
 SPW5 11.64700031 W  
 SPNAM[8] Crp60,0.5,20.1  
 SPOAL8 0.500  
 SPOFFS8 0 Hz  
 SPW8 11.64700031 W

----- CHANNEL f2 -----  
 SFO2 500.1320005 MHz  
 NUC2 1H  
 CPDPRG[2] waltz65  
 PCPD2 80.00 usec  
 PLW2 14.0000000 W  
 PLW12 0.3150000 W

F2 - Processing parameters  
 SI 262144  
 SF 125.7576120 MHz  
 WDW EM  
 SSB 0  
 LB 2.00 Hz  
 GB 0  
 PC 1.40

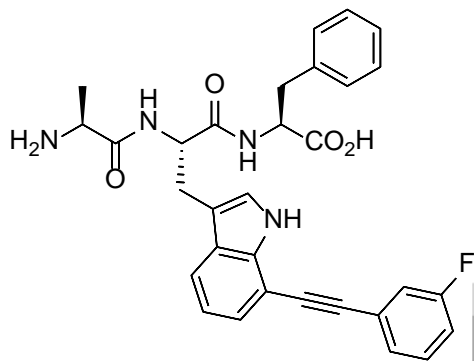

**60**  
<sup>1</sup>H NMR (CD<sub>3</sub>OD)

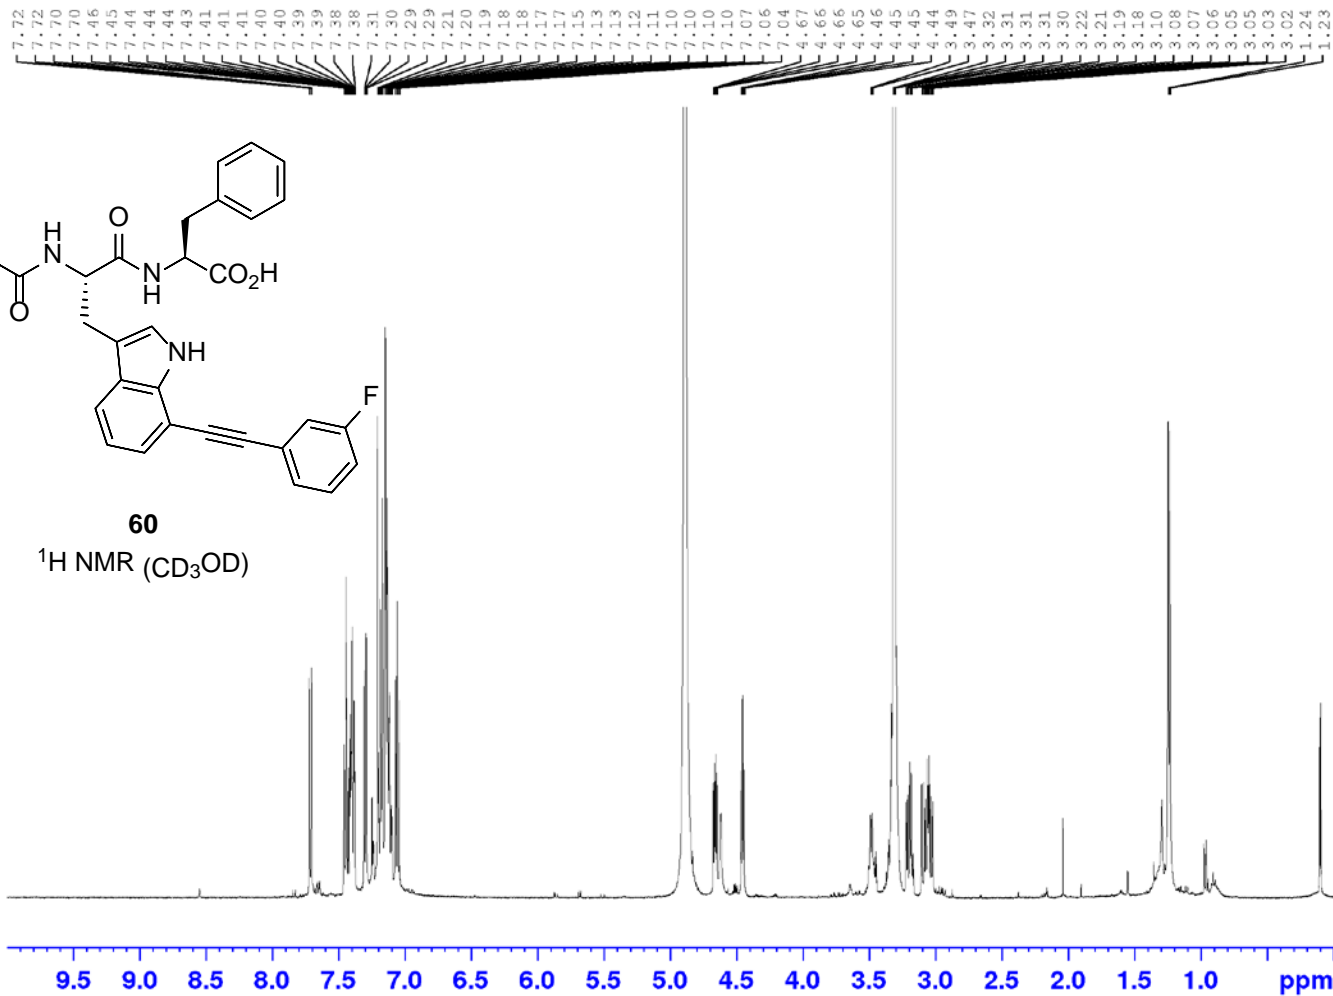

1.00  
 1.35  
 2.14  
 1.20  
 7.79  
 1.32

1.06  
 1.00

1.14  
 1.07  
 0.78  
 1.25

3.06

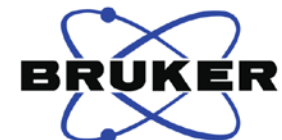

Current Data Parameters  
 NAME 03142016-30-rjmg-mc410-A  
 EXPNO 10  
 PROCNO 1

F2 - Acquisition Parameters  
 Date\_ 20160314  
 Time 21.02  
 INSTRUM spect  
 PROBHD 5 mm CPPBBO BB  
 PULPROG zg30  
 TD 65536  
 SOLVENT MeOD  
 NS 64  
 DS 2  
 SWH 7002.801 Hz  
 FIDRES 0.106854 Hz  
 AQ 4.6792703 sec  
 RG 64  
 DW 71.400 usec  
 DE 10.95 usec  
 TE 295.0 K  
 D1 1.00000000 sec  
 TDO 1

----- CHANNEL f1 -----  
 SFO1 500.1330008 MHz  
 NUC1 1H  
 P1 12.50 usec  
 PLW1 14.00000000 W

F2 - Processing parameters  
 SI 65536  
 SF 500.1300097 MHz  
 WDW EM  
 SSB 0  
 LB 0.30 Hz  
 GB 0  
 PC 1.00

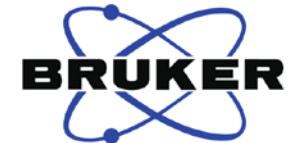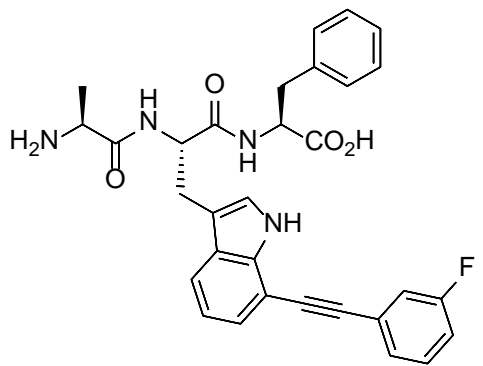

**60**  
<sup>13</sup>C NMR (CD<sub>3</sub>OD)

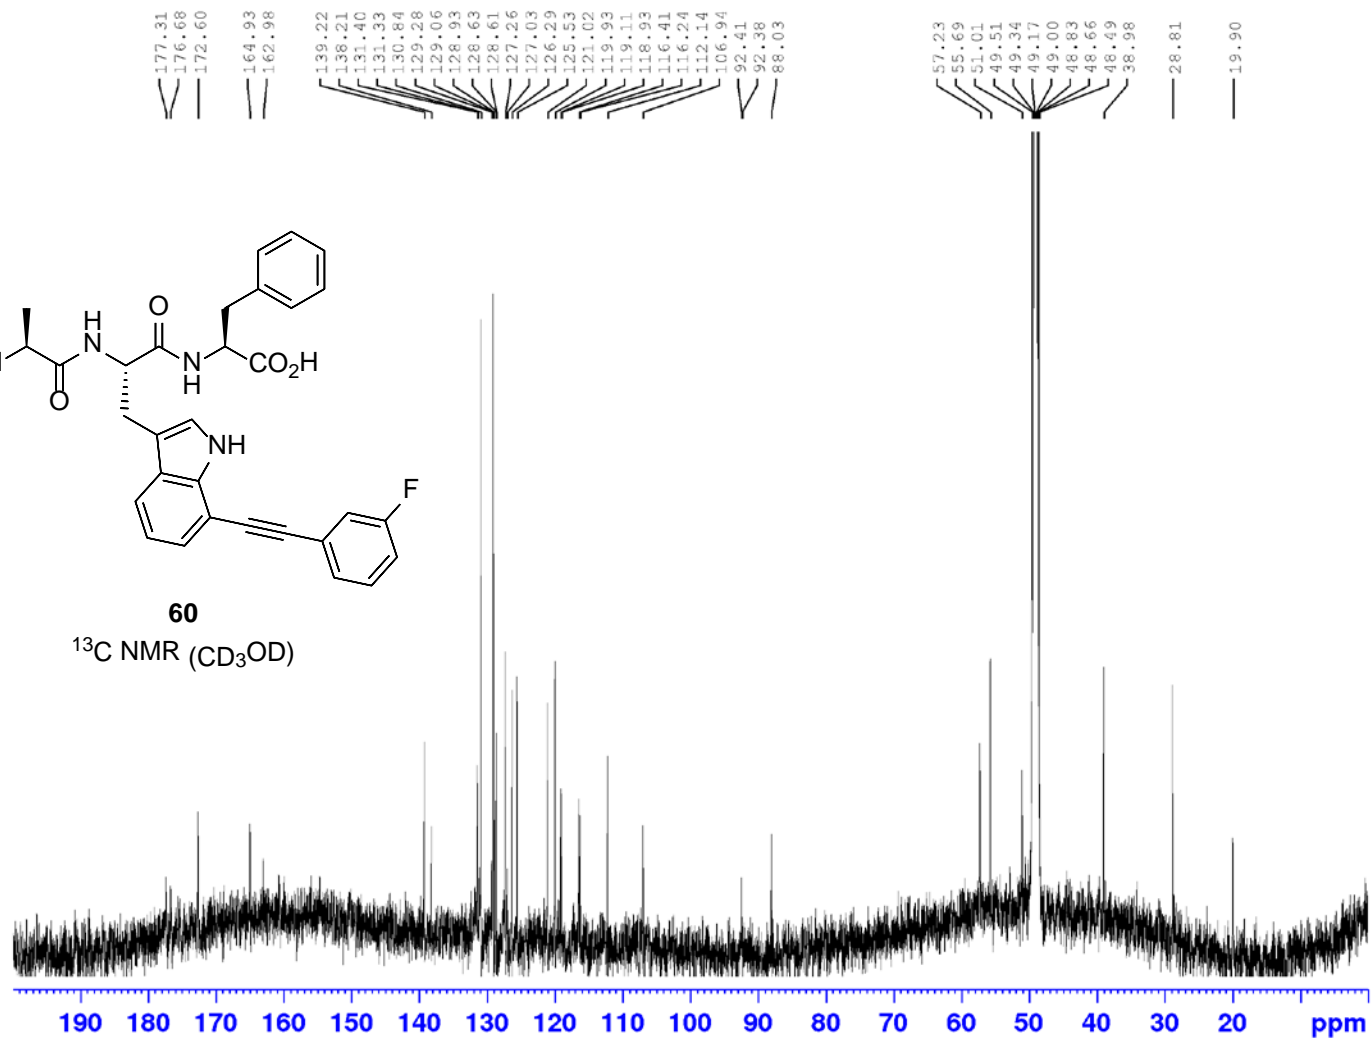

```
Current Data Parameters
NAME      03142016-30-rjmg-mc410-A
EXPNO     12
PROCNO    1

F2 - Acquisition Parameters
Date_     20160314
Time      22.53
INSTRUM   spect
PROBHD    5 mm CPPBBO BB
PULPROG   udefT
TD         21424
SOLVENT   MeOD
NS         1600
DS         0
SWH        29761.904 Hz
FIDRES     1.389185 Hz
AQ         0.3599232 sec
RG         128
DW         16.800 usec
DE         19.22 usec
TE         295.0 K
D1         3.00000000 sec
D11        0.03000000 sec
D12        0.00002000 sec
D20        200.00000000 sec
TD0        1

===== CHANNEL f1 =====
SFO1      125.7716219 MHz
NUC1       13C
P1         11.00 usec
P13        2000.00 usec
P26         500.00 usec
PLW1       63.00000000 W
SPNAM[5]   Crp60comp.4
SPOAL5     0.500
SPOFFS5    0 Hz
SPW5       11.64700031 W
SPNAM[8]   Crp60,0.5,20.1
SPOAL8     0.500
SPOFFS8    0 Hz
SPW8       11.64700031 W

----- CHANNEL f2 -----
SFO2      500.1320005 MHz
NUC2       1H
CPDPRG[2] waltz65
PCPD2     80.00 usec
PLW2      14.00000000 W
PLW12     0.31500000 W

F2 - Processing parameters
SI         262144
SF         125.7576119 MHz
WDW        EM
SSB        0
LB         2.00 Hz
GB         0
PC         1.40
```

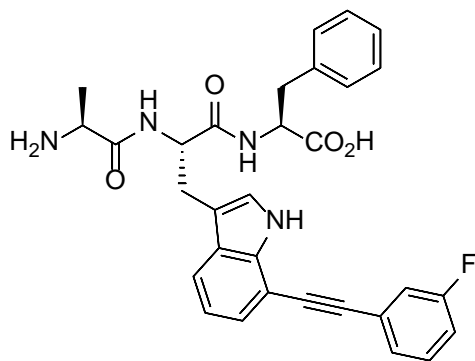

60

$^{19}\text{F}\{^1\text{H}\}$  NMR ( $\text{CD}_3\text{OD}$ )

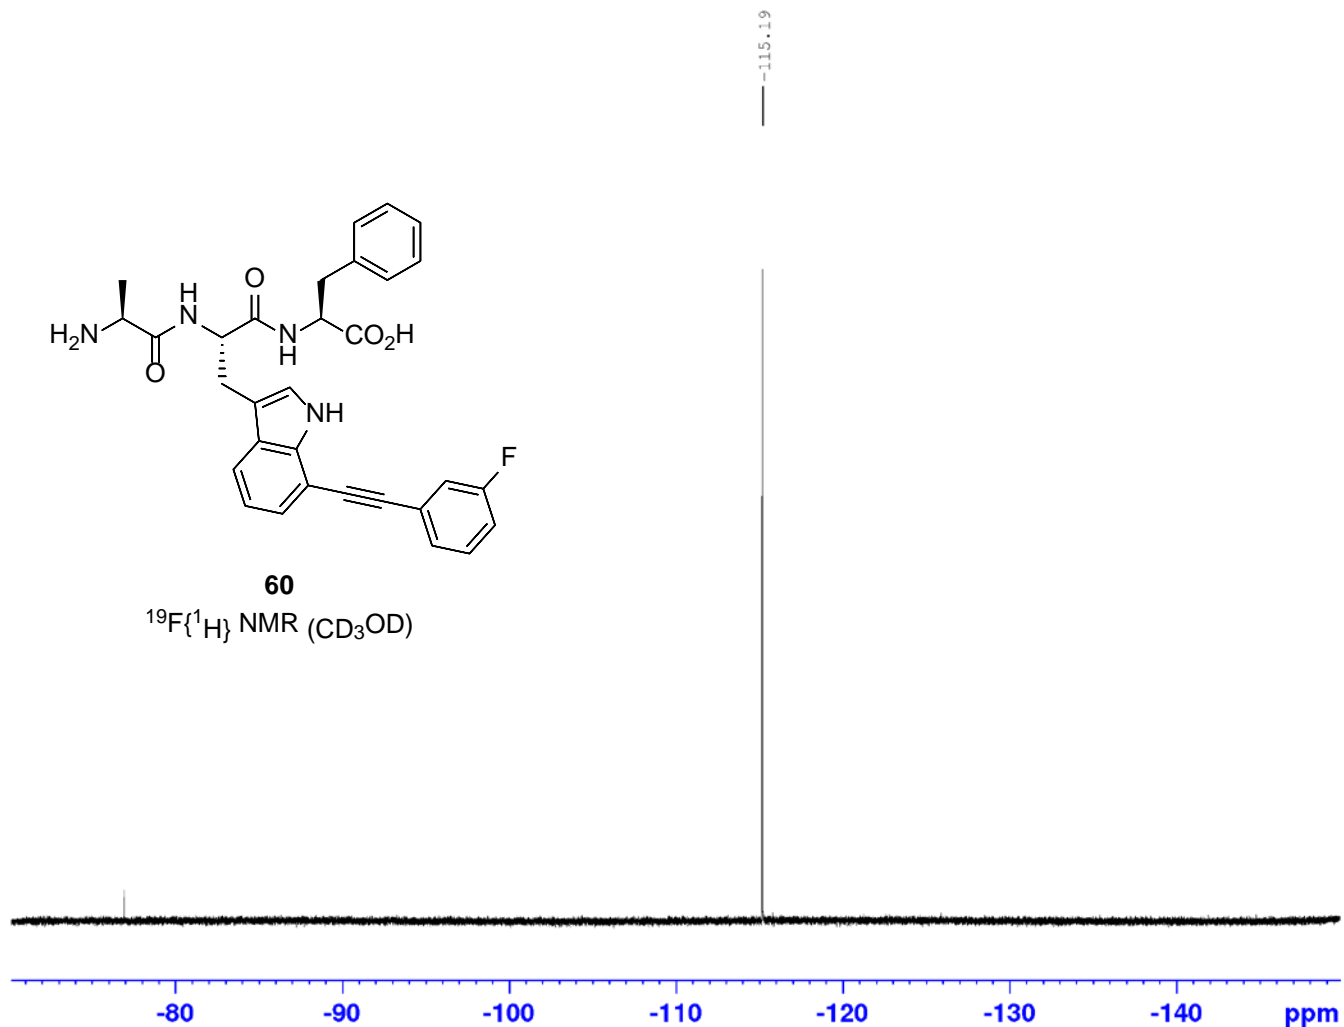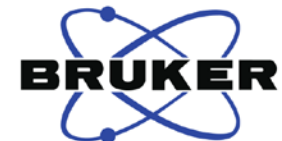

Current Data Parameters  
 NAME 03152016-2-rjmg-mc410-M  
 EXPNO 10  
 PROCNO 1

F2 - Acquisition Parameters  
 Date\_ 20160315  
 Time 16.50  
 INSTRUM AVI400  
 PROBHD 5 mm PABBO BB/  
 PULPROG zgfhigqn.3.and  
 TD 65536  
 SOLVENT MeOD  
 NS 64  
 DS 4  
 SWH 30000.000 Hz  
 FIDRES 0.457764 Hz  
 AQ 1.0922667 sec  
 RG 128  
 DW 16.667 usec  
 DE 8.37 usec  
 TE 295.3 K  
 D1 1.0000000 sec  
 D11 0.0300000 sec  
 D12 0.0000200 sec  
 TD0 1

===== CHANNEL f1 =====  
 SFO1 376.4569514 MHz  
 NUC1  $^{19}\text{F}$   
 P1 15.00 usec  
 PLW1 17.0000000 W

===== CHANNEL f2 =====  
 SFO2 400.1316005 MHz  
 NUC2  $^1\text{H}$   
 CPDPRG[2] waltz65  
 PCPD2 90.00 usec  
 PLW2 16.0000000 W  
 PLW12 0.48688999 W

F2 - Processing parameters  
 SI 65536  
 SF 376.4983662 MHz  
 WDW EM  
 SSB 0  
 LB 0.30 Hz  
 GB 0  
 PC 1.00

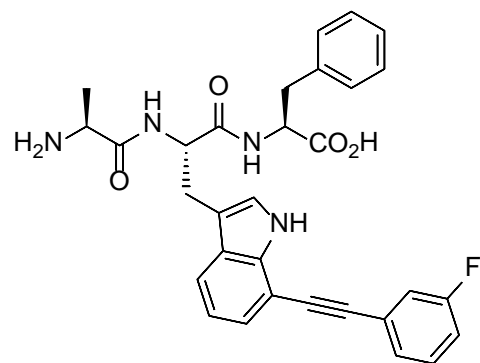

**60**  
<sup>19</sup>F NMR (CD<sub>3</sub>OD)

-115.16  
 -115.18  
 -115.18  
 -115.20  
 -115.20  
 -115.22

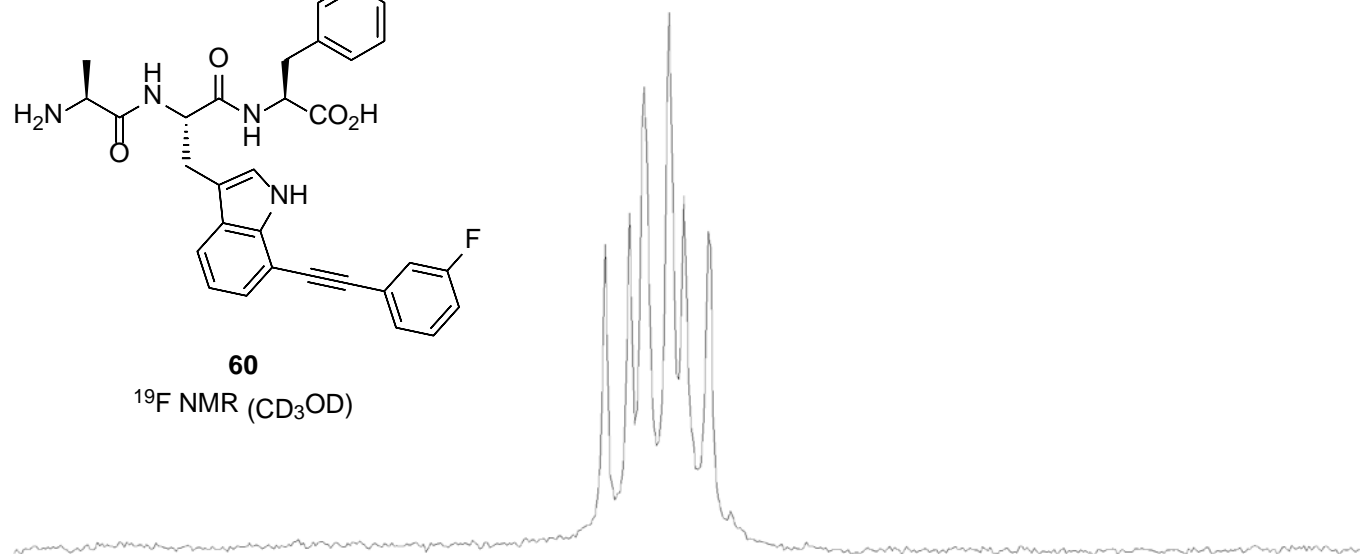

-114.9      -115.0      -115.1      -115.2      -115.3      -115.4      ppm

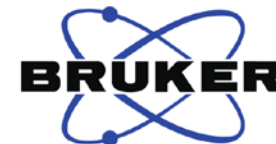

Current Data Parameters  
 NAME 03142016-30-rjmg-mc410-A  
 EXPNO 11  
 PROCNO 1

F2 - Acquisition Parameters  
 Date\_ 20160314  
 Time 21.06  
 INSTRUM spect  
 PROBHD 5 mm CFPBBO BB  
 PULPROG zg  
 TD 65536  
 SOLVENT MeOD  
 NS 32  
 DS 4  
 SWH 37500.000 Hz  
 FIDRES 0.572205 Hz  
 AQ 0.8738133 sec  
 RG 20.2  
 DW 13.333 usec  
 DE 18.16 usec  
 TE 295.0 K  
 D1 1.0000000 sec  
 TD0 1

----- CHANNEL f1 -----  
 SFO1 470.5406119 MHz  
 NUC1 19F  
 P1 15.00 usec  
 PLW1 15.0000000 W

F2 - Processing parameters  
 SI 65536  
 SF 470.5923772 MHz  
 WDW EM  
 SSB 0  
 LB 0.30 Hz  
 GB 0  
 PC 1.00

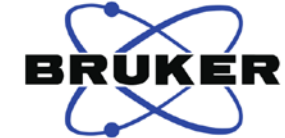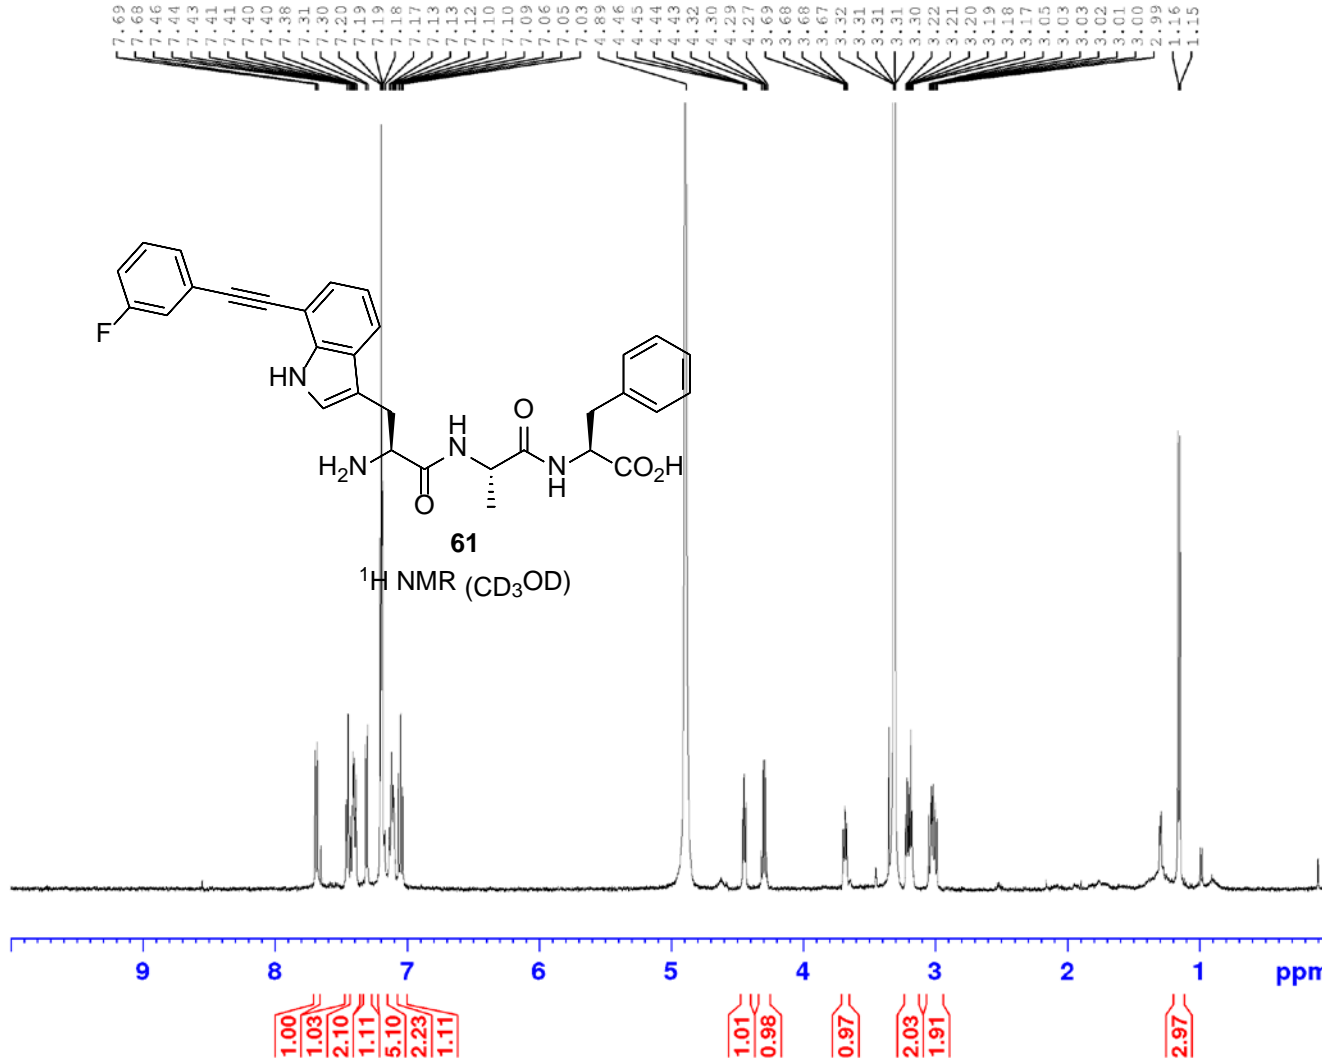

Current Data Parameters  
NAME 03212016-17-rjmg-mc410-F  
EXPNO 10  
PROCNO 1

F2 - Acquisition Parameters  
Date\_ 20160321  
Time 16.28  
INSTRUM spect  
PROBHD 5 mm PABBO BB/  
PULPROG zg30  
TD 65536  
SOLVENT MeOD  
NS 8  
DS 2  
SWH 6996.269 Hz  
FIDRES 0.106755 Hz  
AQ 4.6836395 sec  
RG 121.22  
DW 71.467 usec  
DE 11.38 usec  
TE 295.0 K  
D1 1.00000000 sec  
TD0 1

----- CHANNEL f1 -----  
SFO1 499.9329996 MHz  
NUC1 1H  
P1 10.60 usec  
PLW1 16.00000000 W

F2 - Processing parameters  
SI 65536  
SF 499.9300094 MHz  
WDW EM  
SSB 0  
LB 0.30 Hz  
GB 0  
PC 1.00

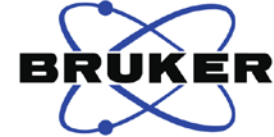

Current Data Parameters  
NAME 03222016-1-rjmg-mc410-A  
EXPNO 10  
PROCNO 1

F2 - Acquisition Parameters  
Date\_ 20160322  
Time\_ 21.11  
INSTRUM spect  
PROBHD 5 mm CPPBB0 BB  
PULPROG udef1  
TD 21424  
SOLVENT MeOD  
NS 2000  
DS 0  
SWH 29761.904 Hz  
FIDRES 1.389185 Hz  
AQ 0.3599232 sec  
RG 128  
DW 16.800 usec  
DE 19.22 usec  
TE 295.0 K  
D1 3.00000000 sec  
D11 0.03000000 sec  
D12 0.00002000 sec  
D20 200.00000000 sec  
TD0 1

===== CHANNEL f1 =====  
SFO1 125.7716219 MHz  
NUC1 13C  
P1 11.00 usec  
P13 2000.00 usec  
P26 500.00 usec  
PLW1 63.00000000 W  
SPNAM[5] Crp60comp.4  
SPCAL5 0.500  
SPOFFS5 0 Hz  
SPW5 11.64700031 W  
SPNAM[8] Crp60,0.5,20.1  
SPCAL8 0.500  
SPOFFS8 0 Hz  
SPW8 11.64700031 W

===== CHANNEL f2 =====  
SFO2 500.1320005 MHz  
NUC2 1H  
CPDPRG[2] waltz65  
PCPD2 80.00 usec  
PLW2 14.00000000 W  
PLW12 0.31500000 W

F2 - Processing parameters  
SI 262144  
SF 125.7576123 MHz  
WDW EM  
SSB 0  
LB 2.00 Hz  
GB 0  
PC 1.40

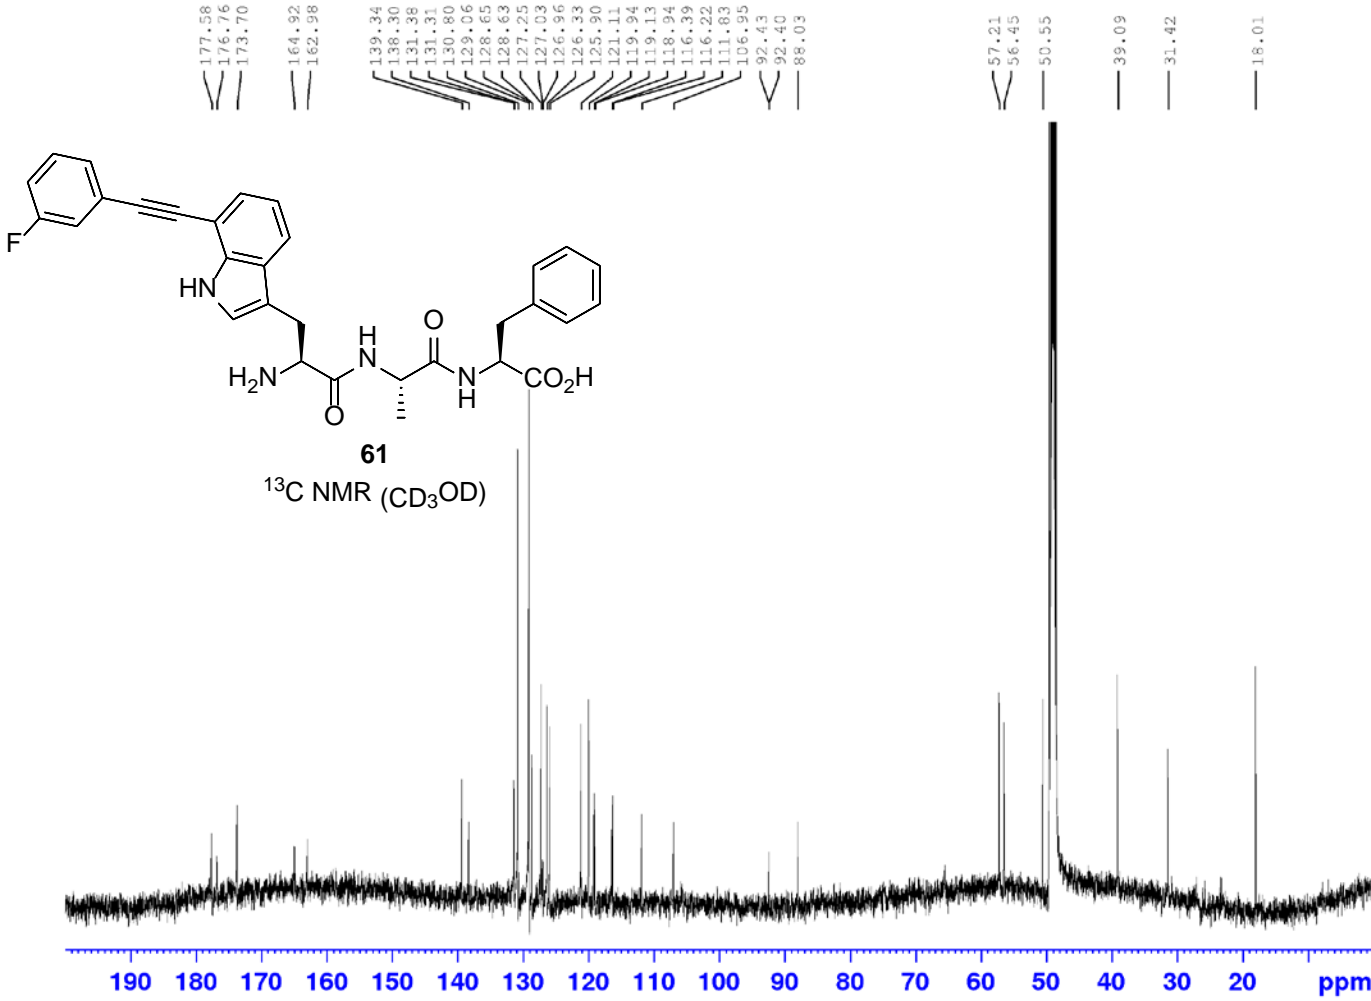

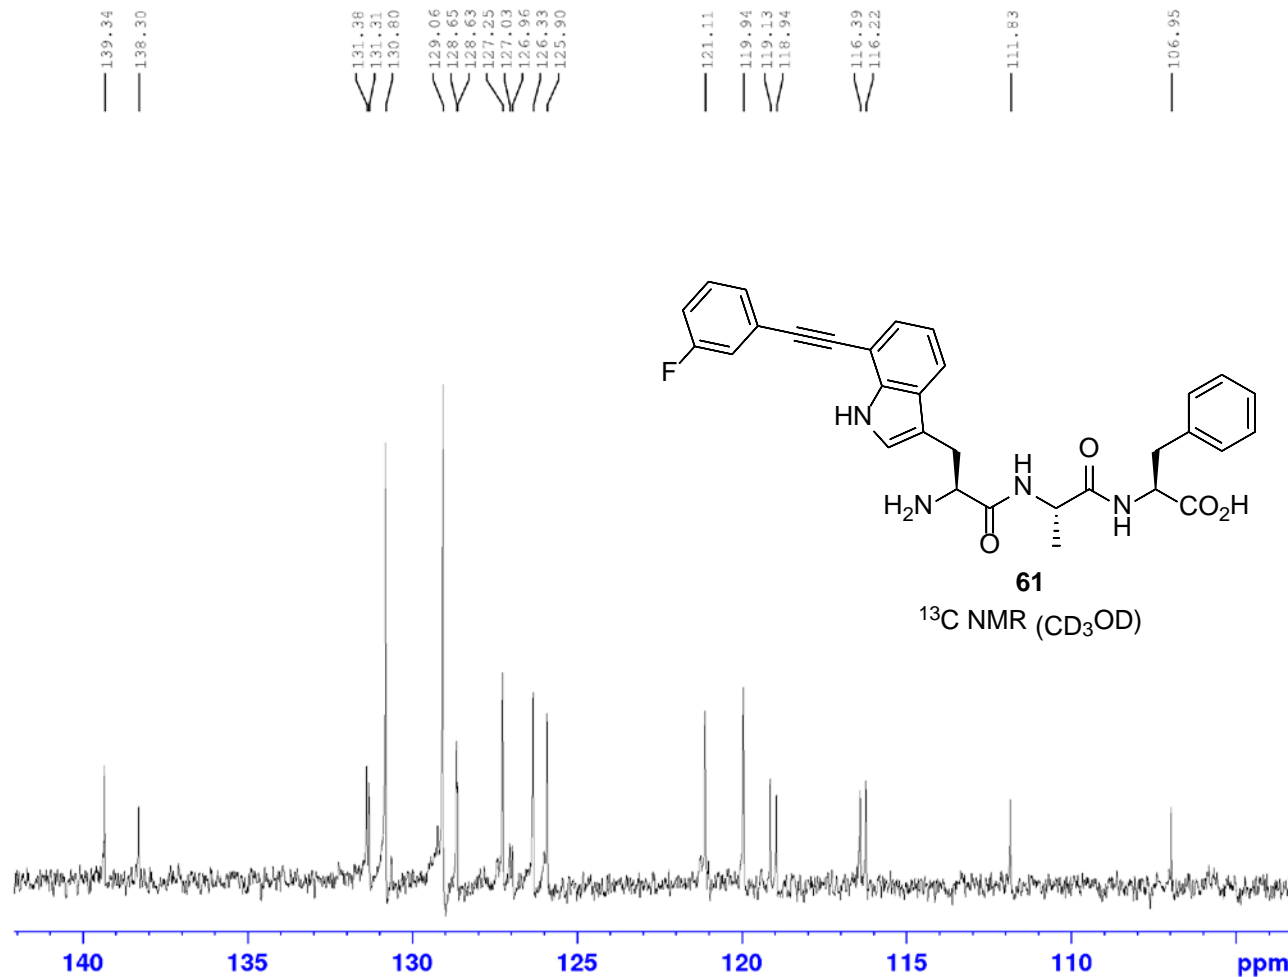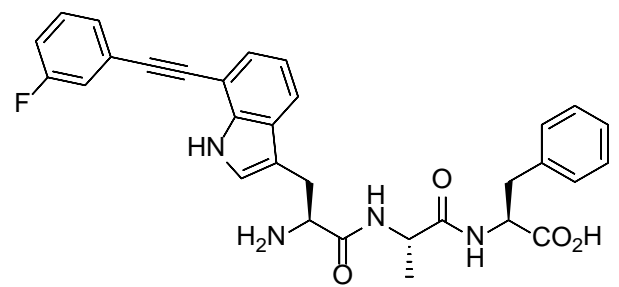

**61**  
<sup>13</sup>C NMR (CD<sub>3</sub>OD)

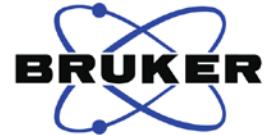

Current Data Parameters  
 NAME 03222016-1-rjmg-mc410-A  
 EXPNO 10  
 PROCNO 1

F2 - Acquisition Parameters  
 Date\_ 20160322  
 Time 21.11  
 INSTRUM spect  
 PROBHD 5 mm CFPBBO BB  
 PULPROG udef1  
 TD 21424  
 SOLVENT MeOD  
 NS 2000  
 DS 0  
 SWH 29761.904 Hz  
 FIDRES 1.389185 Hz  
 AQ 0.3599232 sec  
 RG 128  
 DW 16.800 usec  
 DE 19.22 usec  
 TE 295.0 K  
 D1 3.0000000 sec  
 D11 0.0300000 sec  
 D12 0.0000200 sec  
 D20 200.0000000 sec  
 TD0 1

===== CHANNEL f1 =====  
 SFO1 125.7716219 MHz  
 NUC1 13C  
 P1 11.00 usec  
 P13 2000.00 usec  
 P26 500.00 usec  
 PLW1 63.0000000 W  
 SPNAM[5] Crp60comp.4  
 SPOAL5 0.500  
 SPOFFS5 0 Hz  
 SPW5 11.64700031 W  
 SPNAM[8] Crp60,0.5,20.1  
 SPOAL8 0.500  
 SPOFFS8 0 Hz  
 SPW8 11.64700031 W

===== CHANNEL f2 =====  
 SFO2 500.1320005 MHz  
 NUC2 1H  
 CPDPRG[2] waltz65  
 PCPD2 80.00 usec  
 PLW2 14.0000000 W  
 PLW12 0.3150000 W

F2 - Processing parameters  
 SI 262144  
 SF 125.7576123 MHz  
 WDW EM  
 SSB 0  
 LB 2.00 Hz  
 GB 0  
 PC 1.40



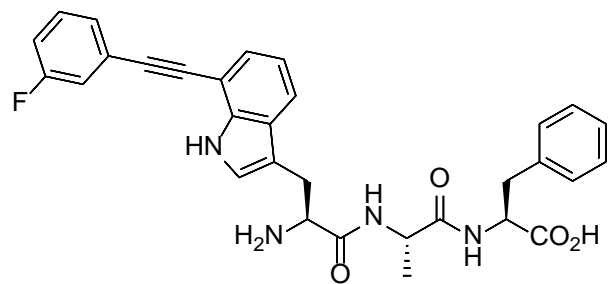

61

$^{19}\text{F}\{^1\text{H}\}$  NMR ( $\text{CD}_3\text{OD}$ )

-115.20

-80 -90 -100 -110 -120 -130 -140 ppm

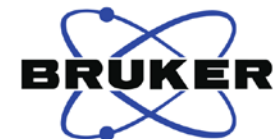

Current Data Parameters  
 NAME 03212016-17-rjmg-mc410-F  
 EXPNO 11  
 PROCNO 1

F2 - Acquisition Parameters  
 Date\_ 20160321  
 Time 16.31  
 INSTRUM spect  
 PROBHD 5 mm PABBO BB/  
 PULPROG zgfhigq.3.and  
 TD 65536  
 SOLVENT MeOD  
 NS 32  
 DS 4  
 SWH 37500.000 Hz  
 FIDRES 0.572205 Hz  
 AQ 0.8738133 sec  
 RG 77.86  
 DW 13.333 usec  
 DE 6.75 usec  
 TE 295.0 K  
 D1 1.00000000 sec  
 D11 0.03000000 sec  
 D12 0.00002000 sec  
 TD0 1

----- CHANNEL f1 -----  
 SFO1 470.3524446 MHz  
 NUC1 19F  
 P1 14.60 usec  
 PLW1 48.00000000 W

----- CHANNEL f2 -----  
 SFO2 499.9319997 MHz  
 NUC2 1H  
 CPDPRG[2] waltz65  
 PCPD2 80.00 usec  
 PLW2 16.00000000 W  
 PLW12 0.27563000 W

F2 - Processing parameters  
 SI 65536  
 SF 470.4041892 MHz  
 WDW EM  
 SSB 0  
 LB 0.30 Hz  
 GB 0  
 PC 1.00



Current Data Parameters  
NAME 03232016-5-rjmg-mc410-F  
EXPNO 10  
PROCNO 1

F2 - Acquisition Parameters  
Date\_ 20160323  
Time 14.45  
INSTRUM spect  
PROBHD 5 mm PABBO BB/  
PULPROG zgpg30  
TD 65536  
SOLVENT MeOD  
NS 32  
DS 4  
SWH 37500.000 Hz  
FIDRES 0.572205 Hz  
AQ 0.8738133 sec  
RG 121.22  
DW 13.333 usec  
DE 6.75 usec  
TE 295.0 K  
D1 1.0000000 sec  
TD0 1

===== CHANNEL f1 =====  
SFO1 470.3524446 MHz  
NUC1 19F  
P1 14.60 usec  
PLW1 48.0000000 W

F2 - Processing parameters  
SI 65536  
SF 470.4041892 MHz  
WDW EM  
SSB 0  
LB 0.30 Hz  
GB 0  
PC 1.00

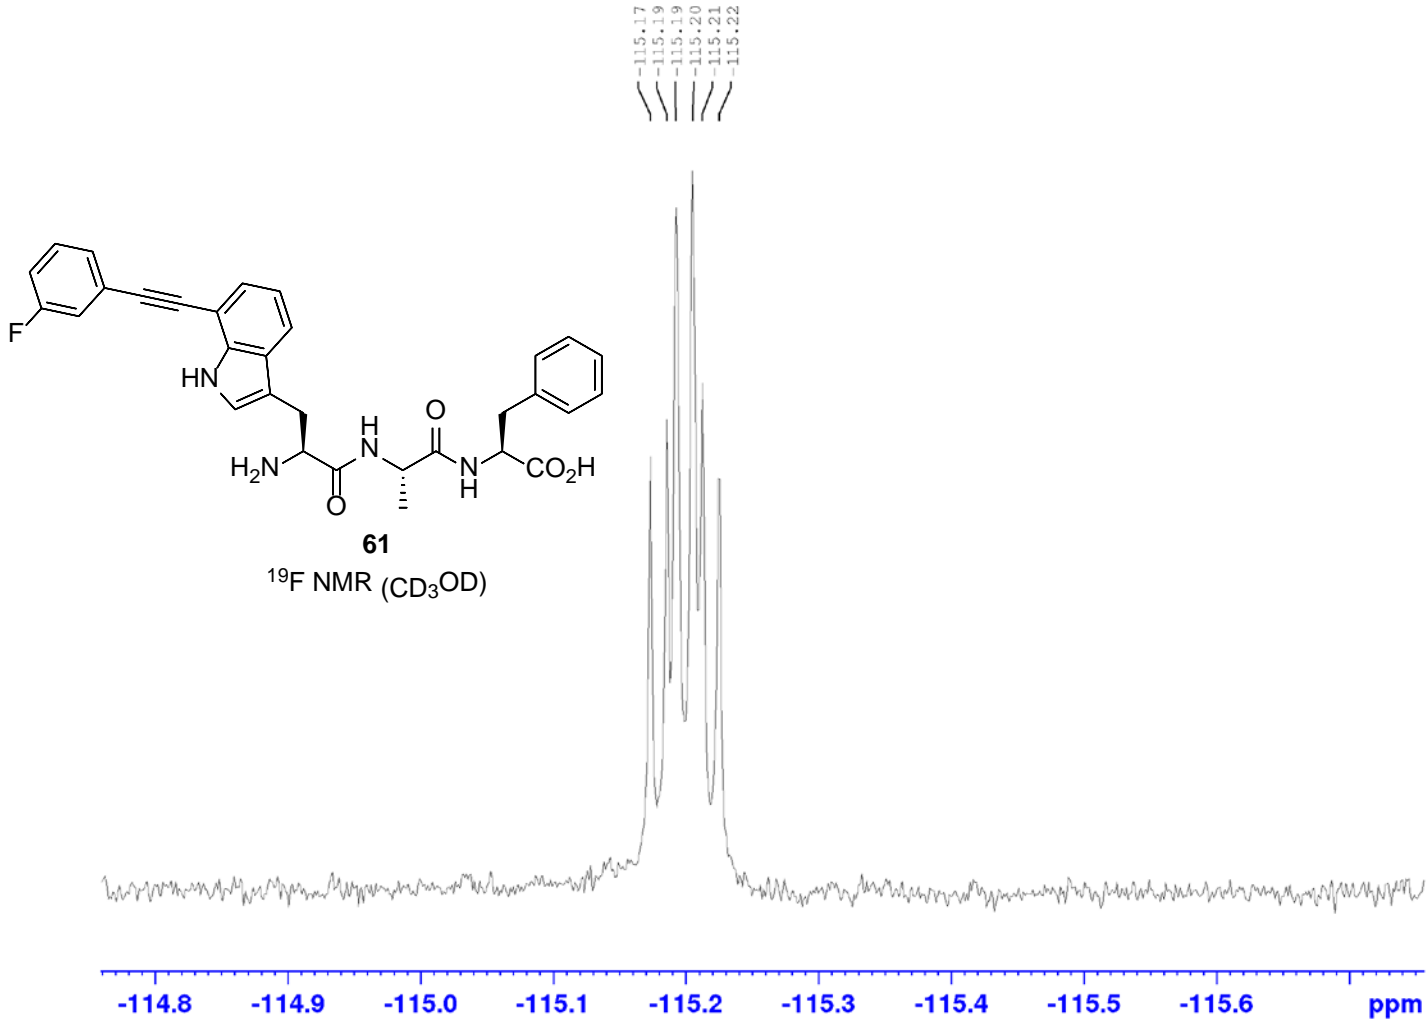



07012016-7-rjmg-mc410-H.10.fid  
19F Observe without 1H decoupling - SW 80 ppm  
MJC Br Cys HPLC 1

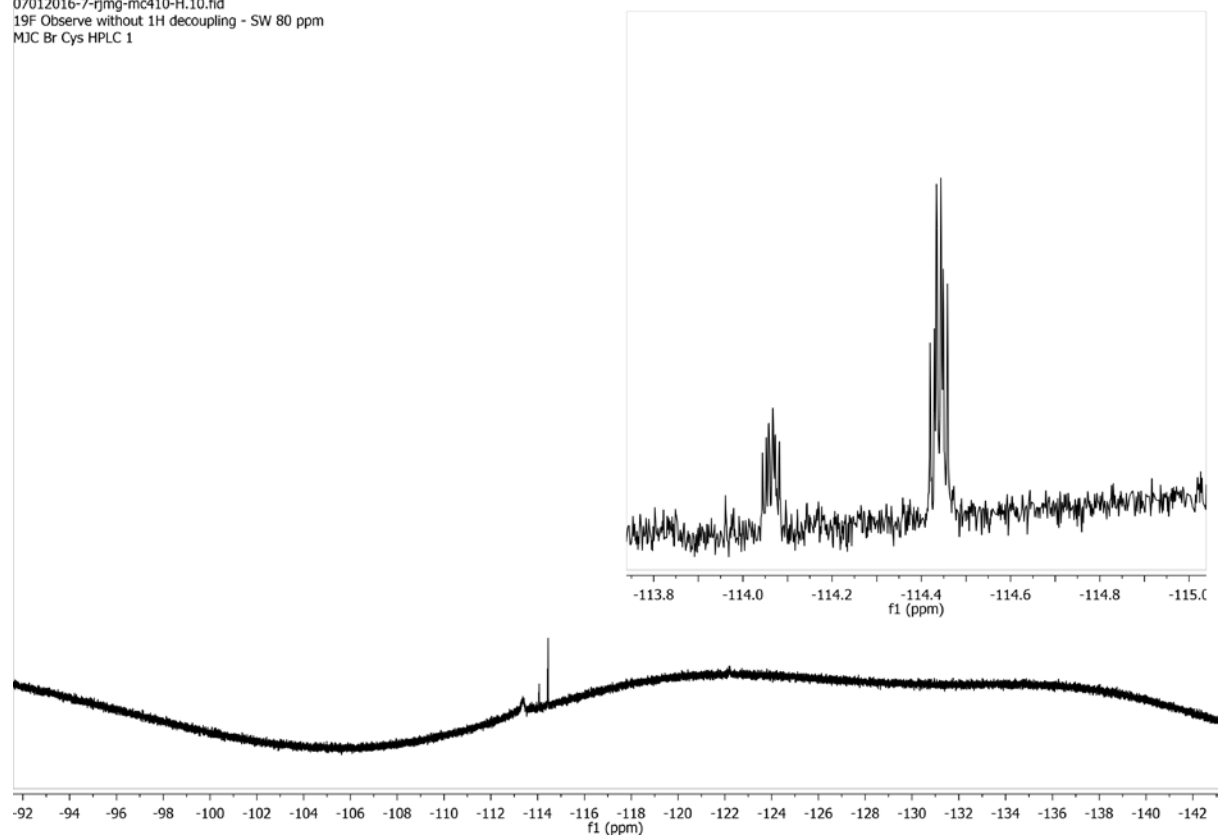

$^{19}\text{F}$  NMR ( $\text{D}_2\text{O}$ ) of **64** and **65**

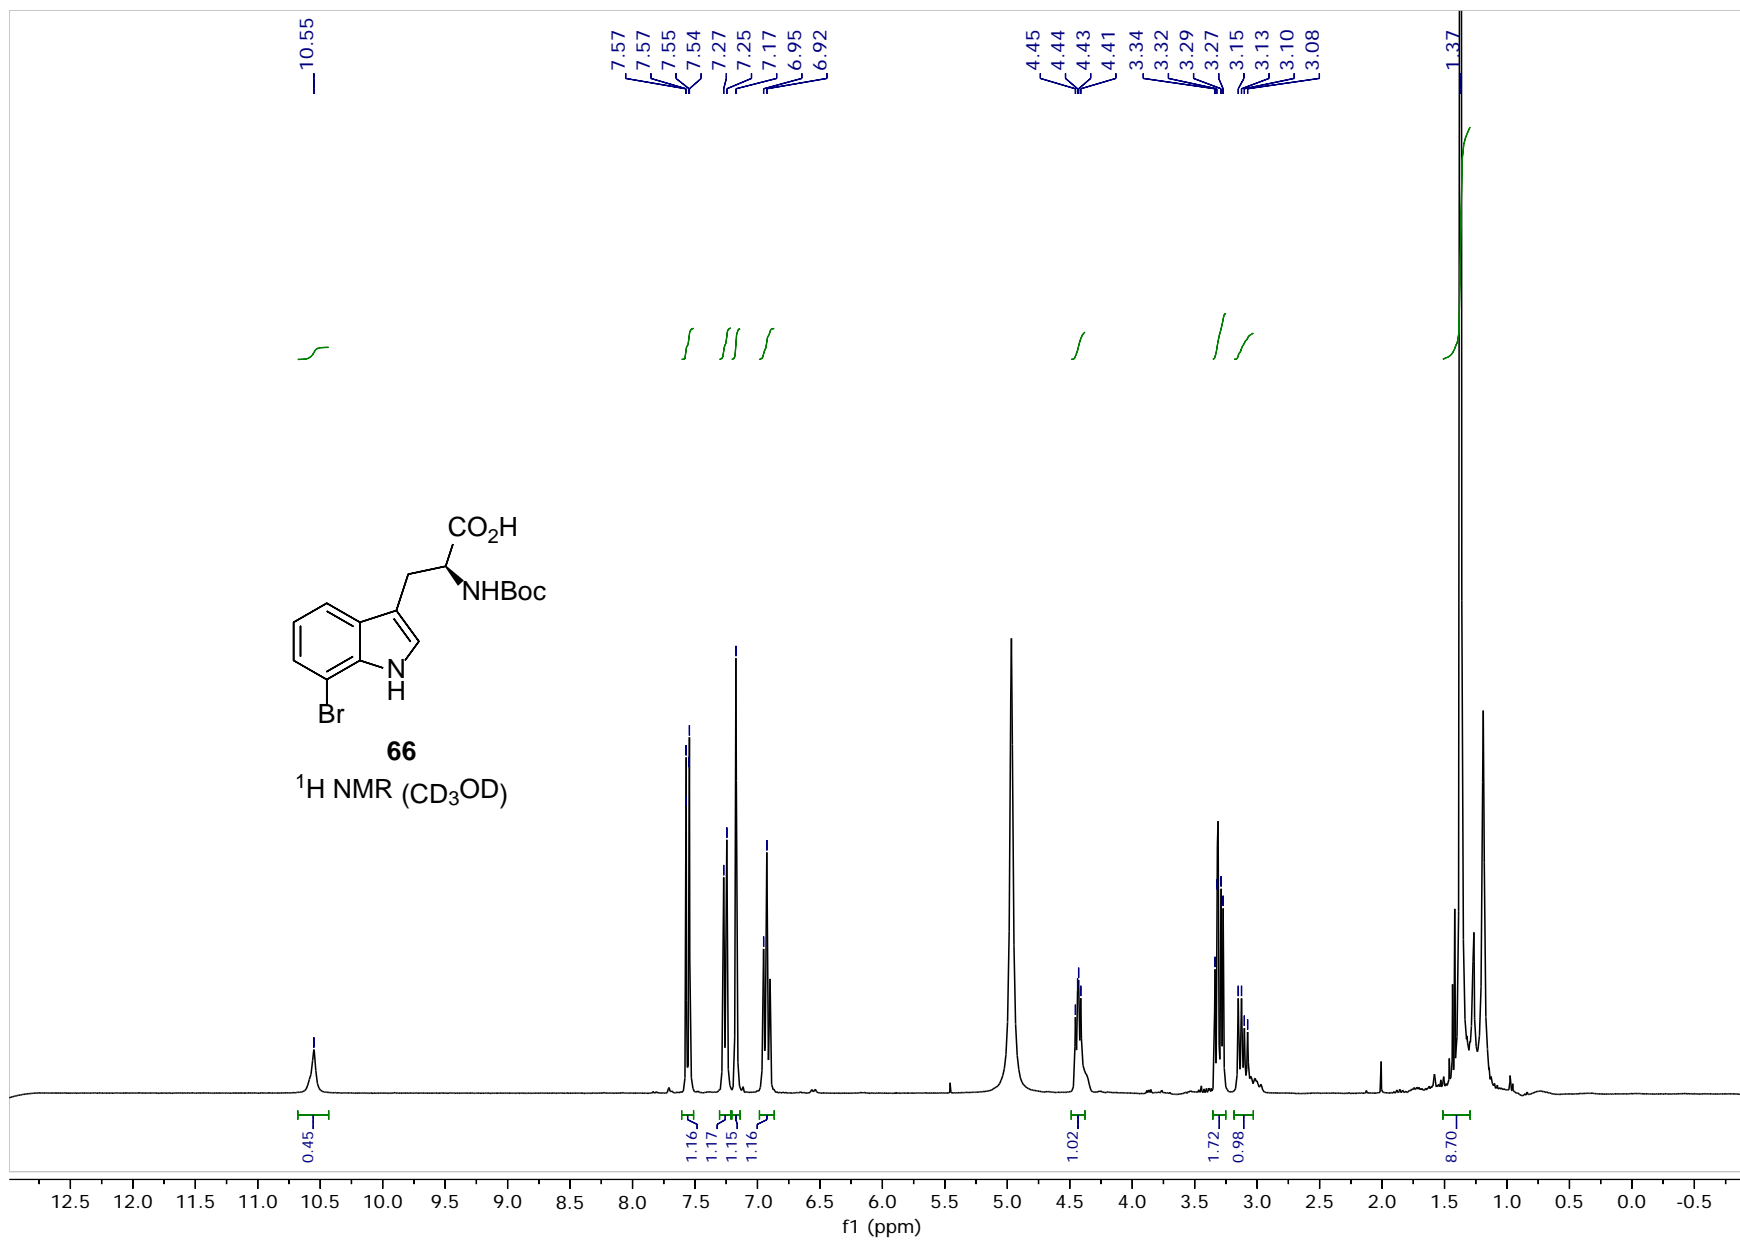

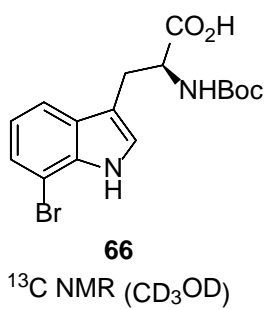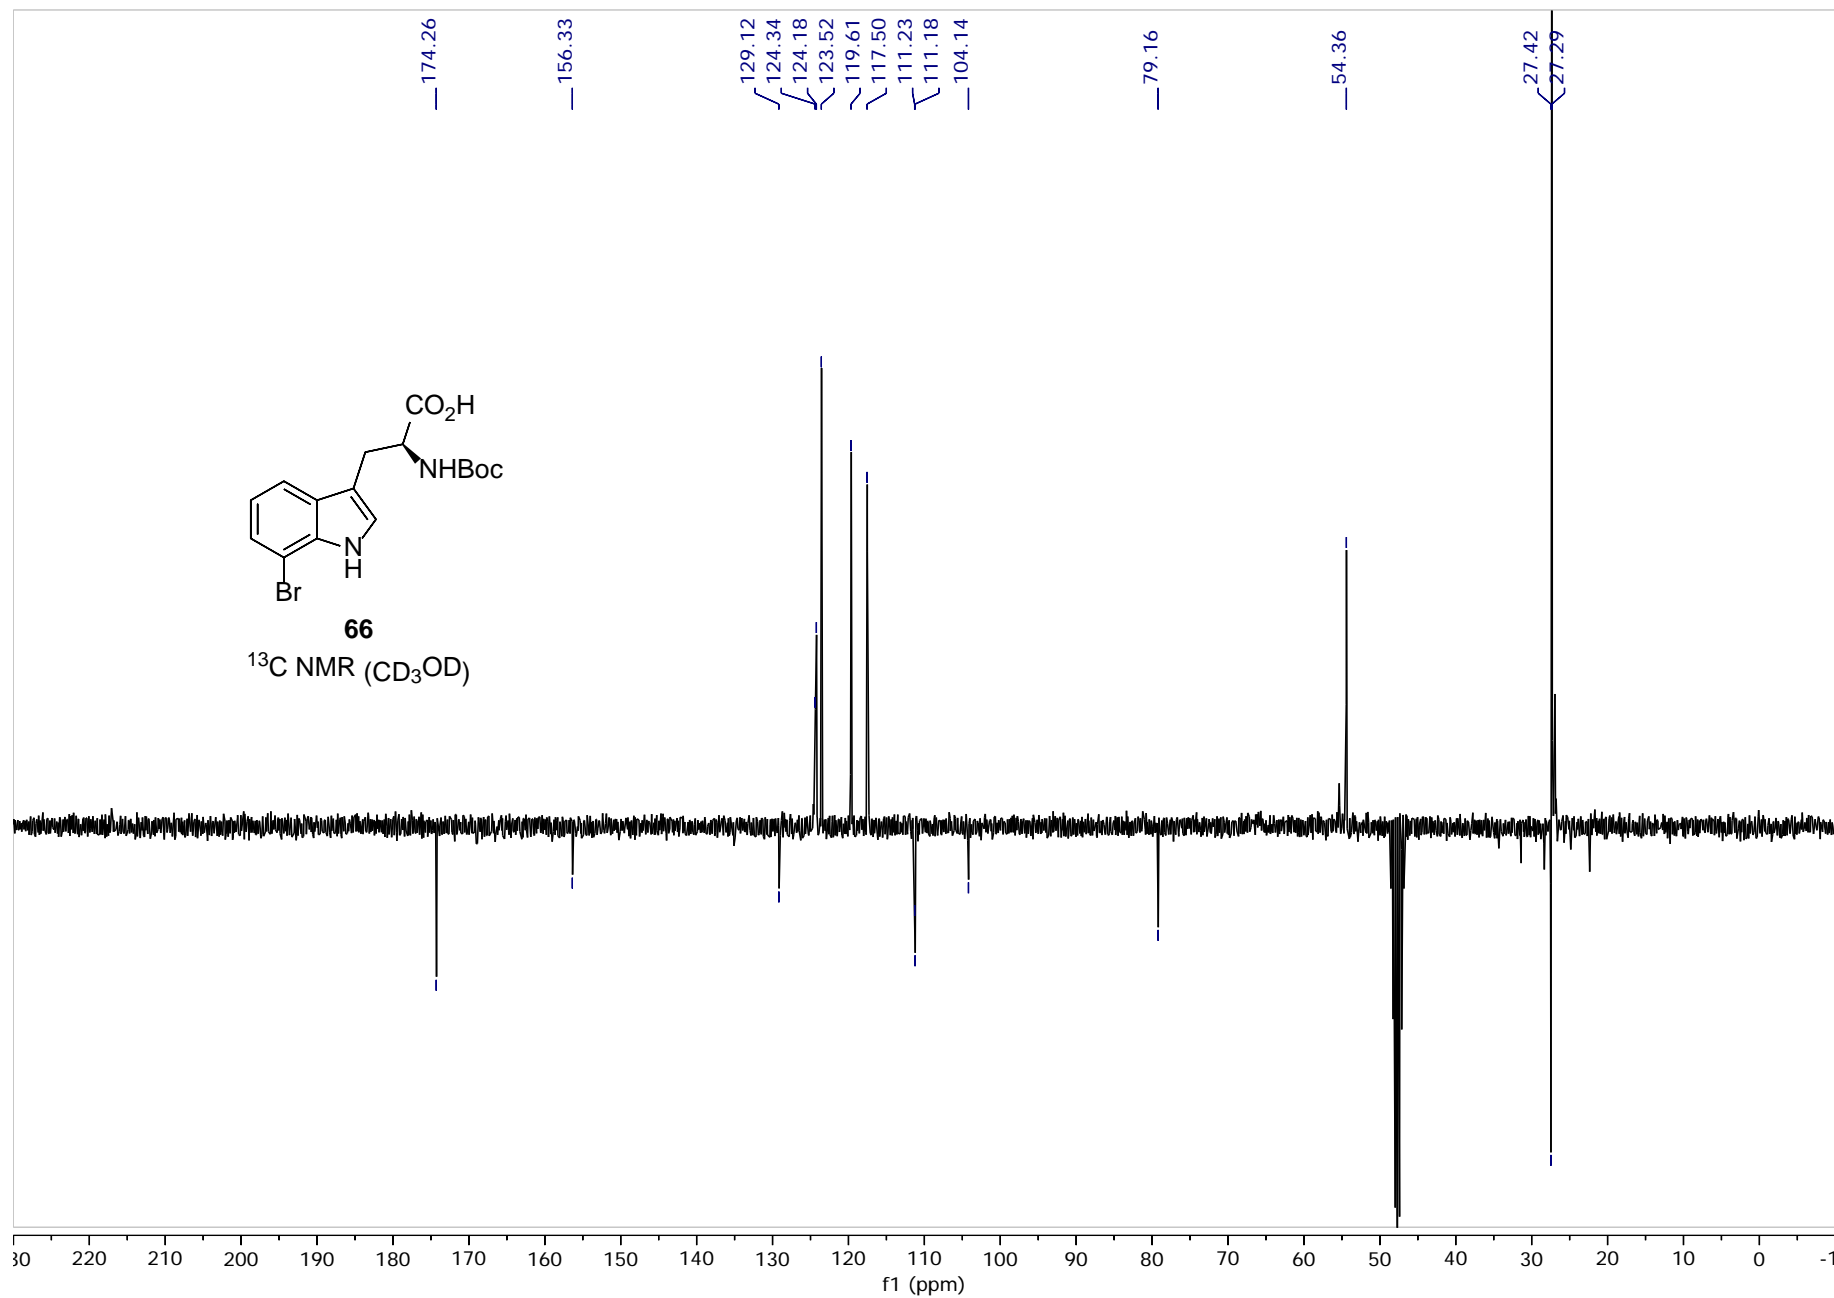

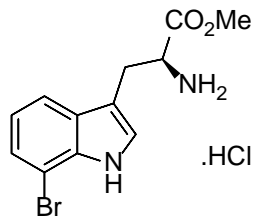

67

<sup>1</sup>H NMR (CD<sub>3</sub>Cl)

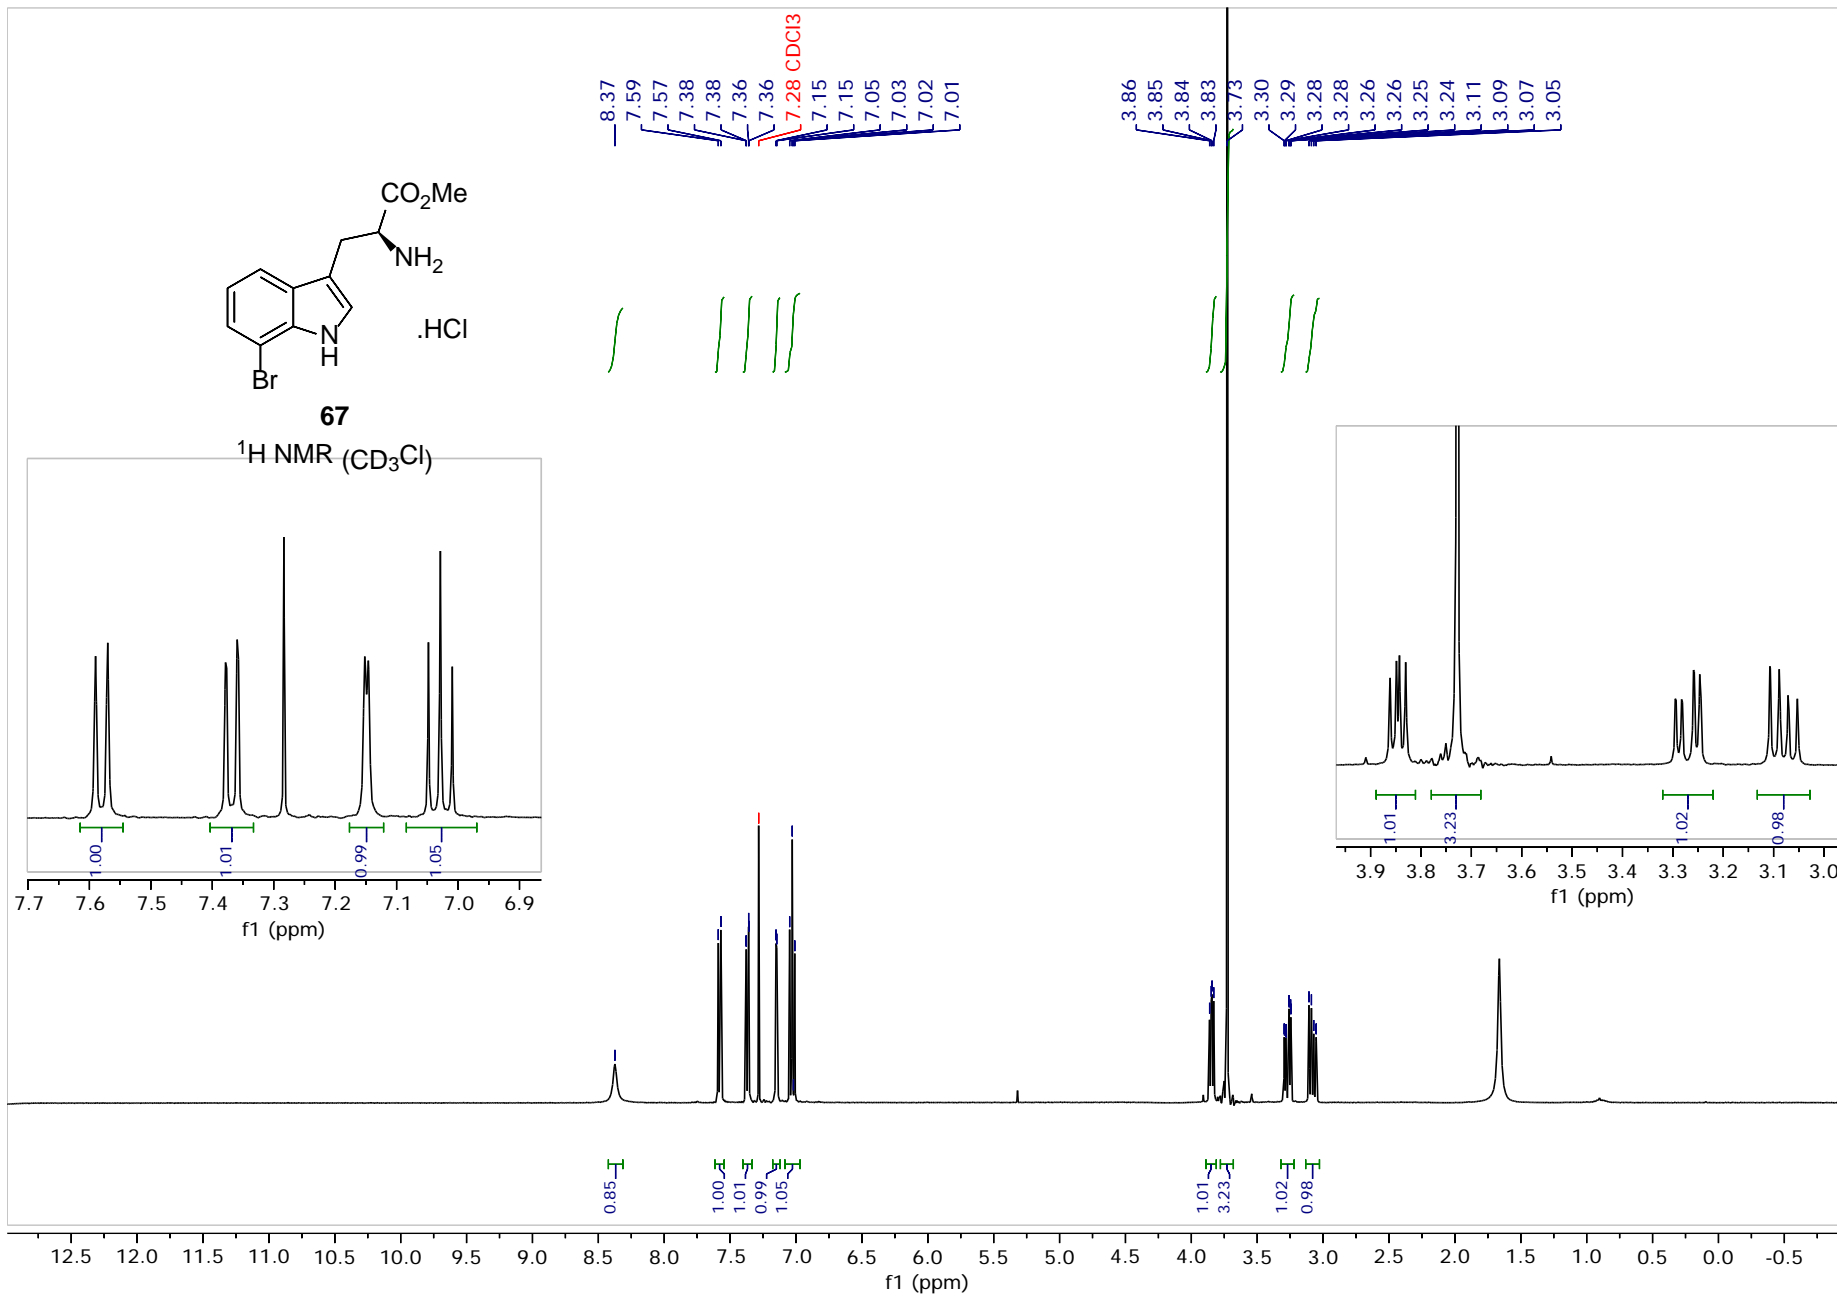

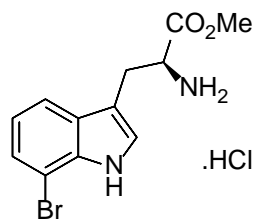

$^{13}\text{C}$  NMR ( $\text{CD}_3\text{Cl}$ )

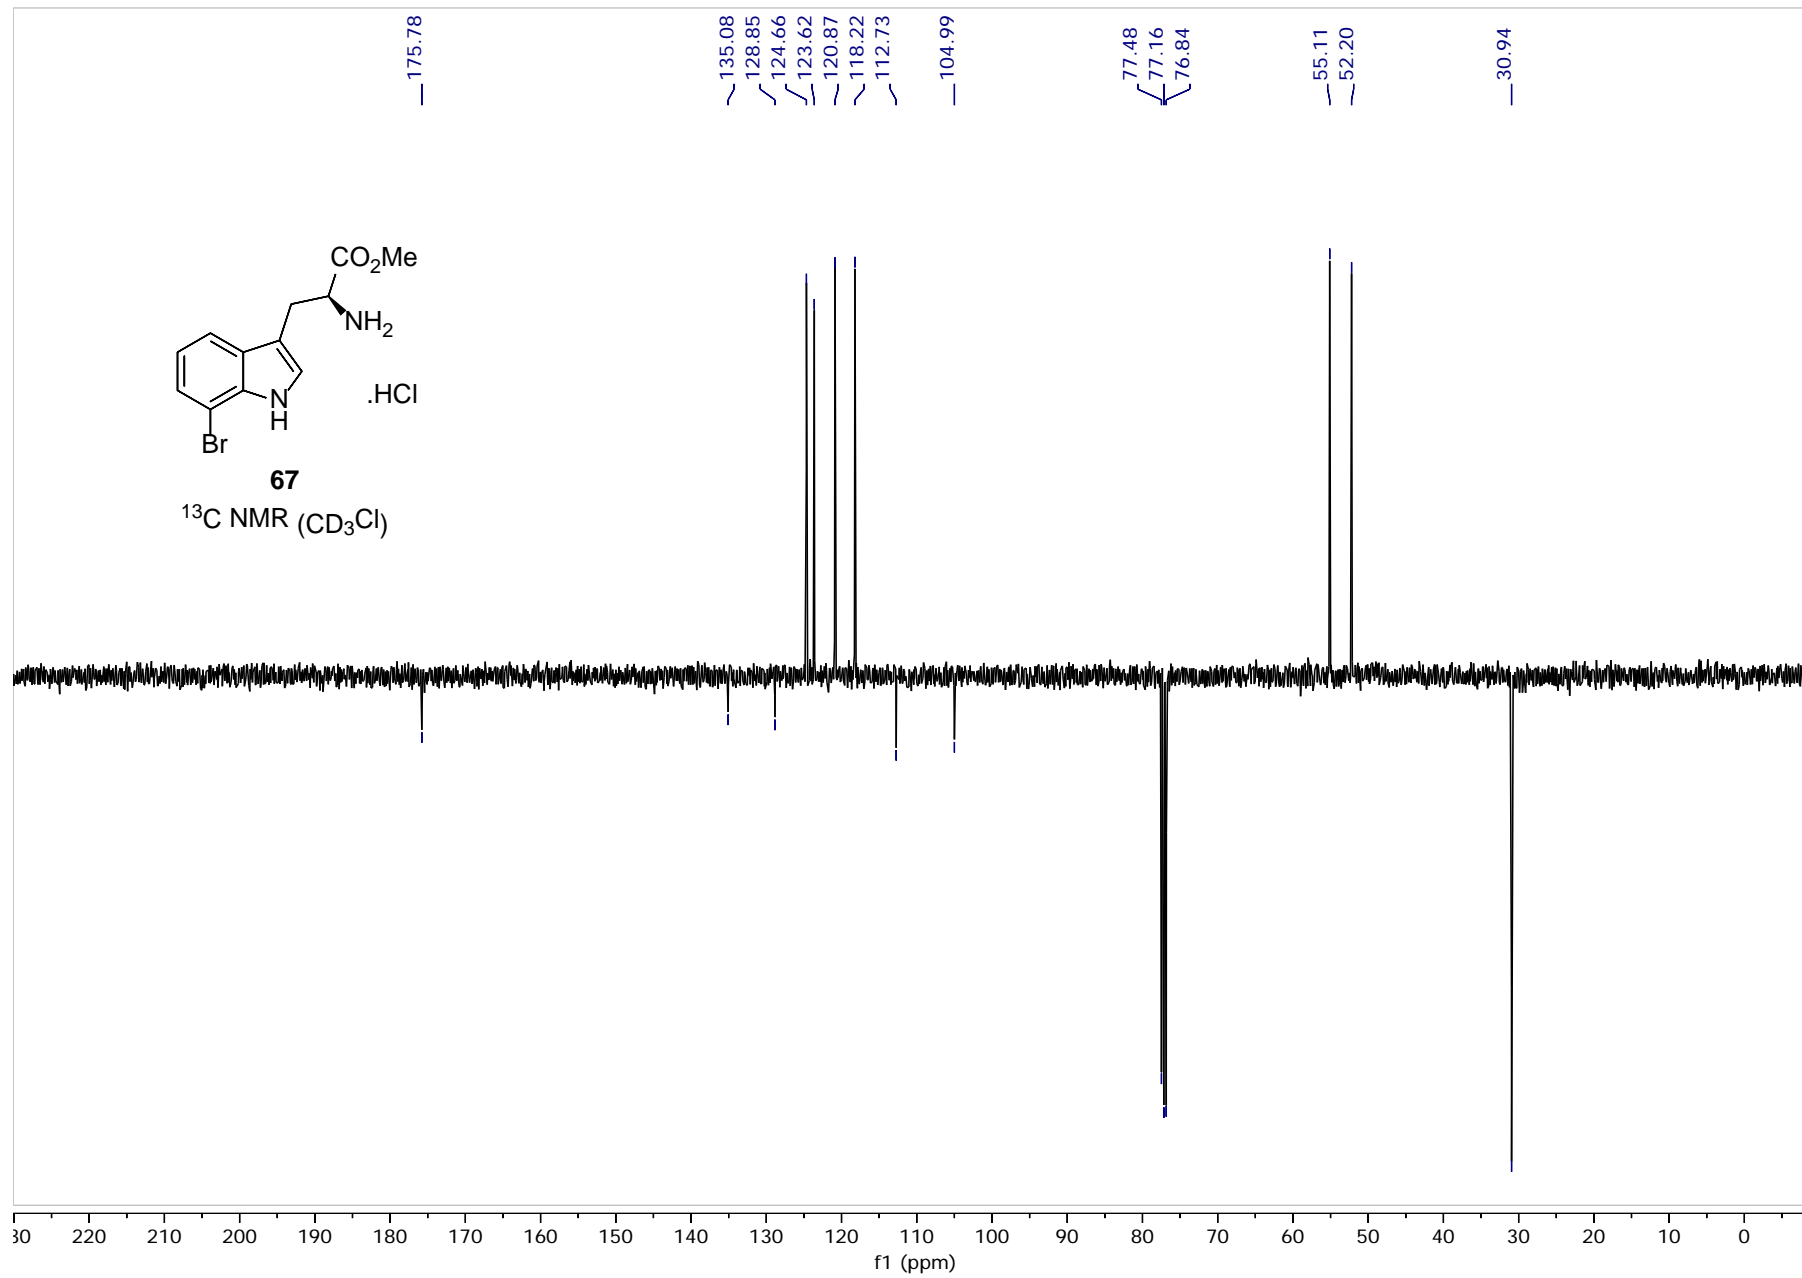



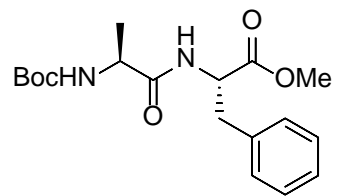

**68**

<sup>1</sup>H NMR (CDCl<sub>3</sub>)

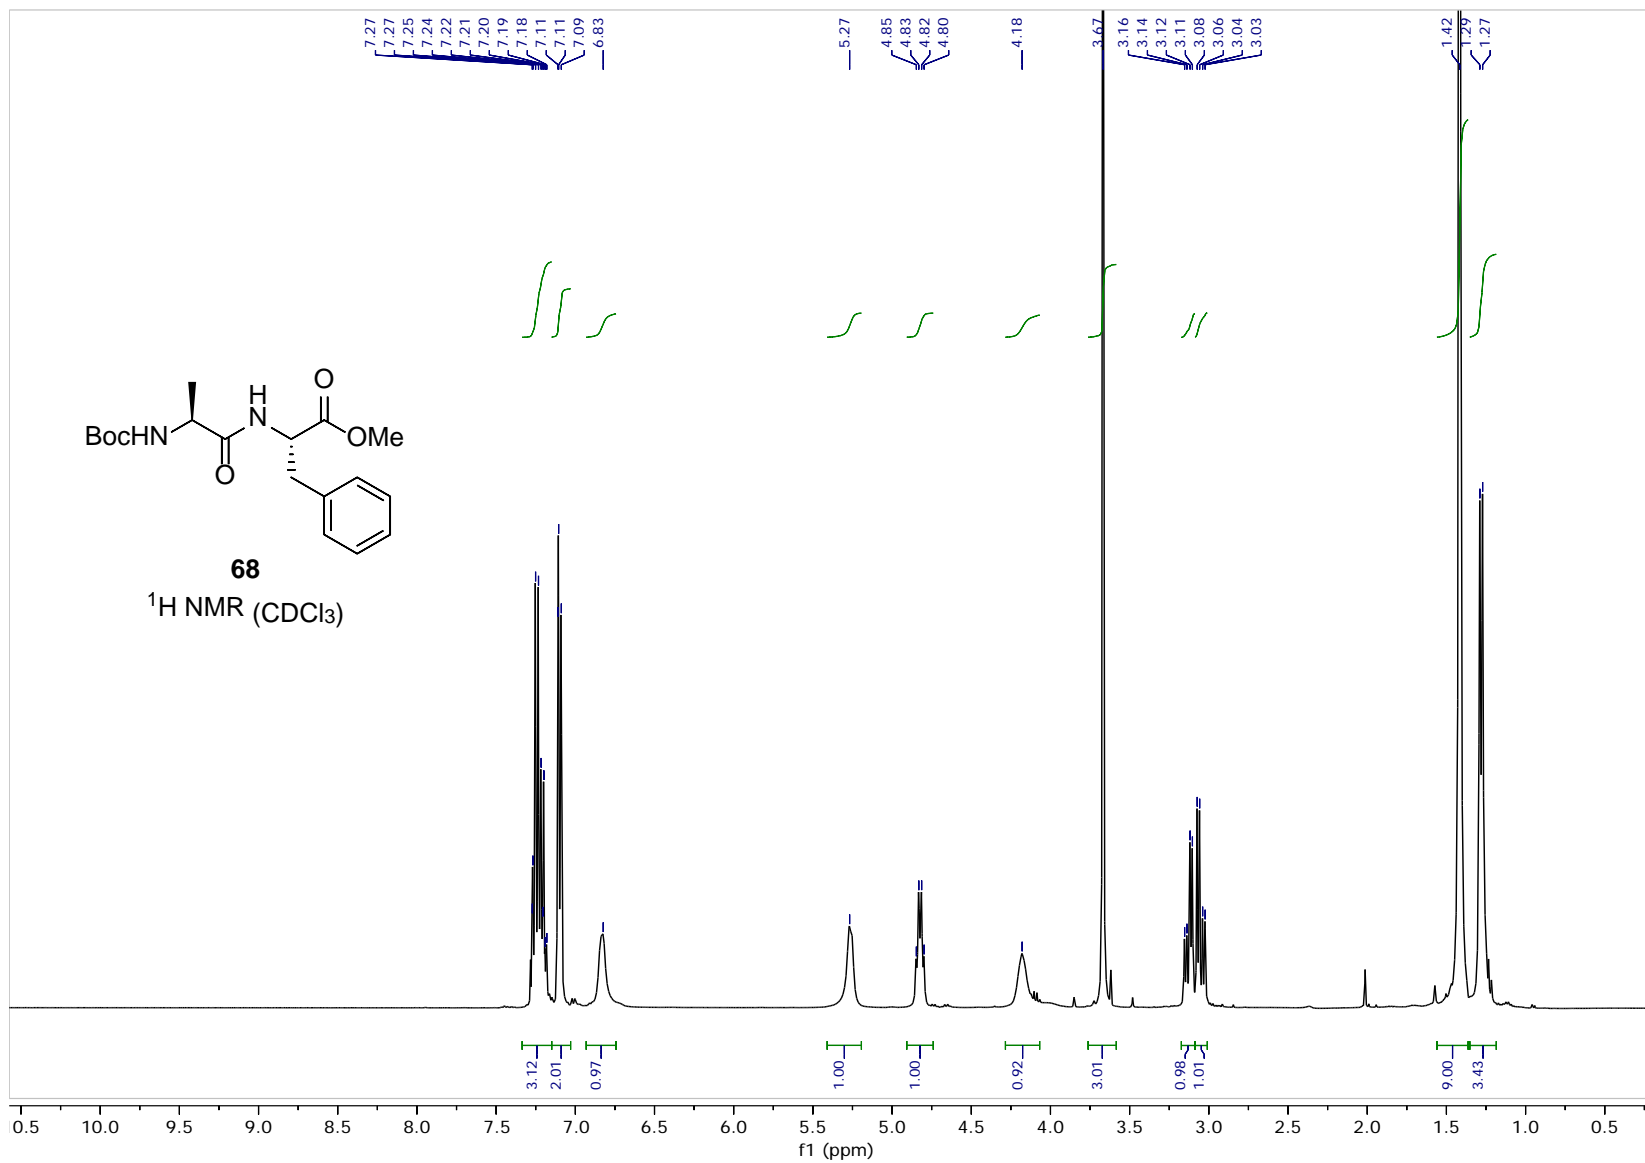

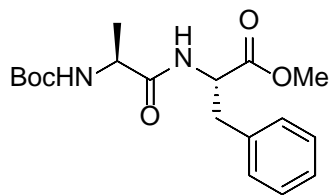

**68**

$^{13}\text{C}$  NMR ( $\text{CDCl}_3$ )

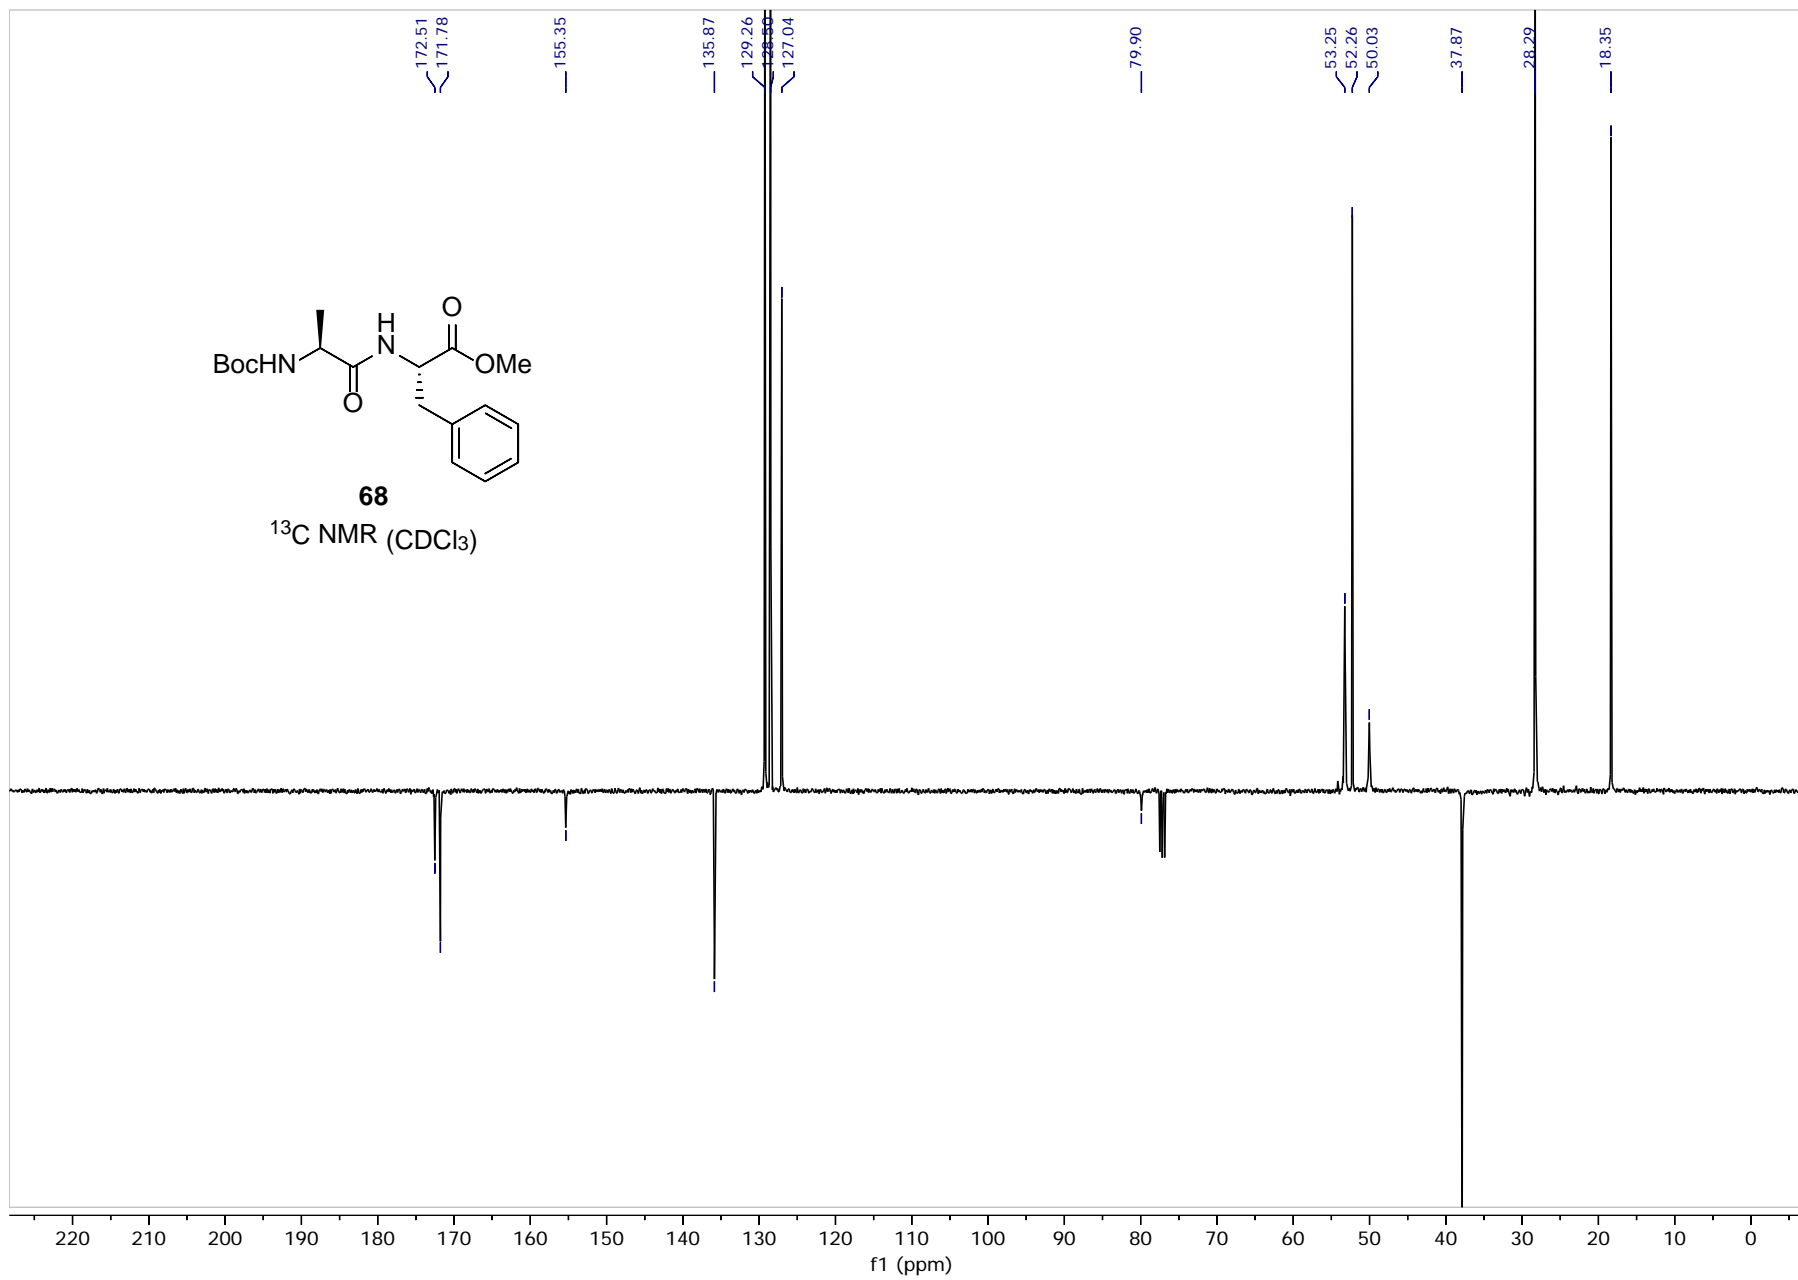

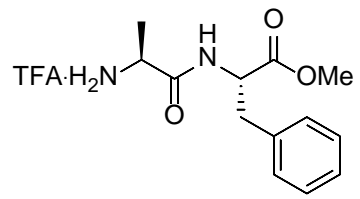

69

<sup>1</sup>H NMR (CD<sub>3</sub>OD)

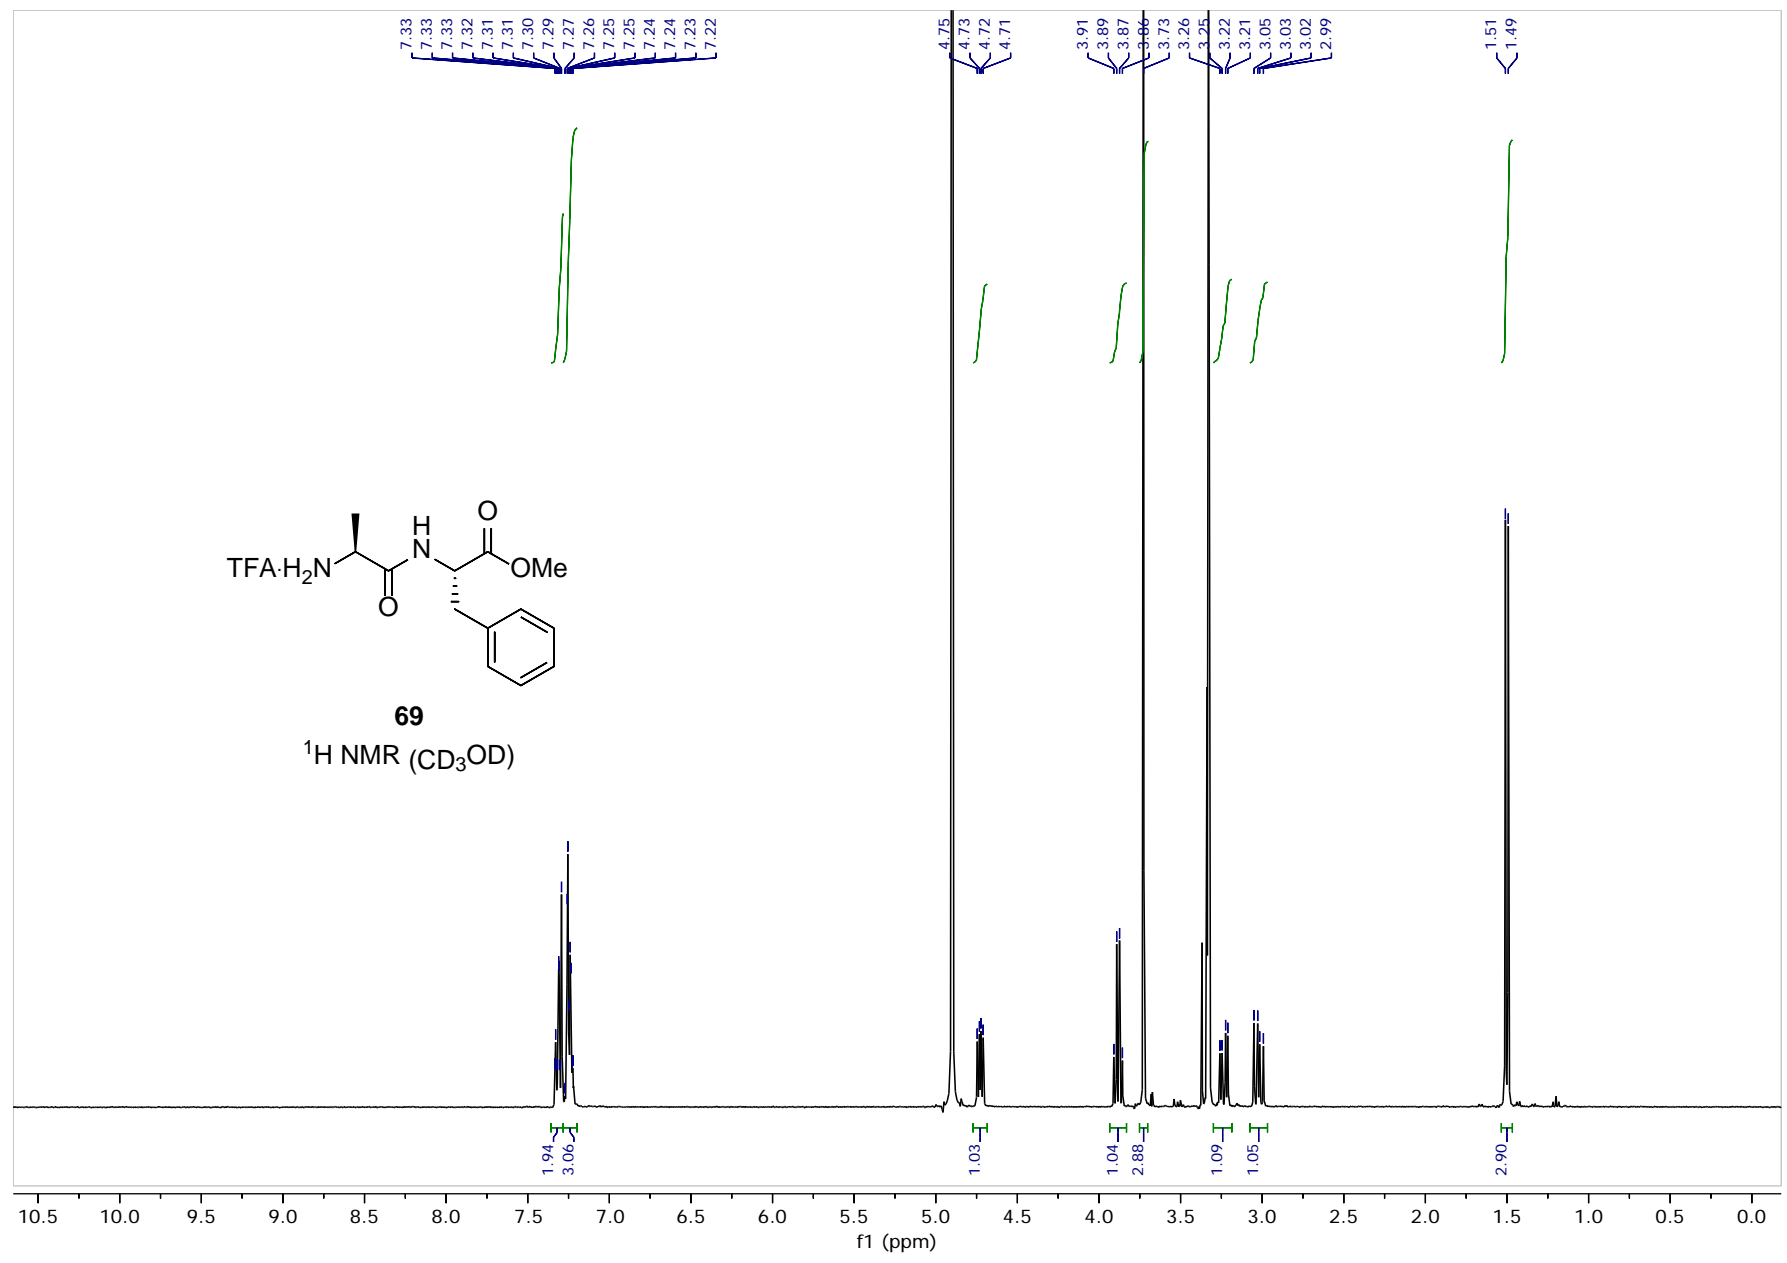

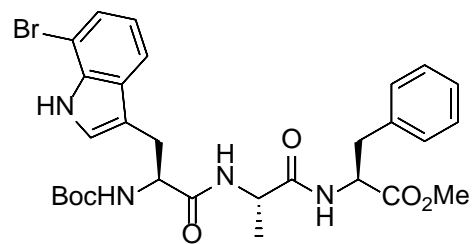

**70**

<sup>1</sup>H NMR (CD<sub>3</sub>OD)

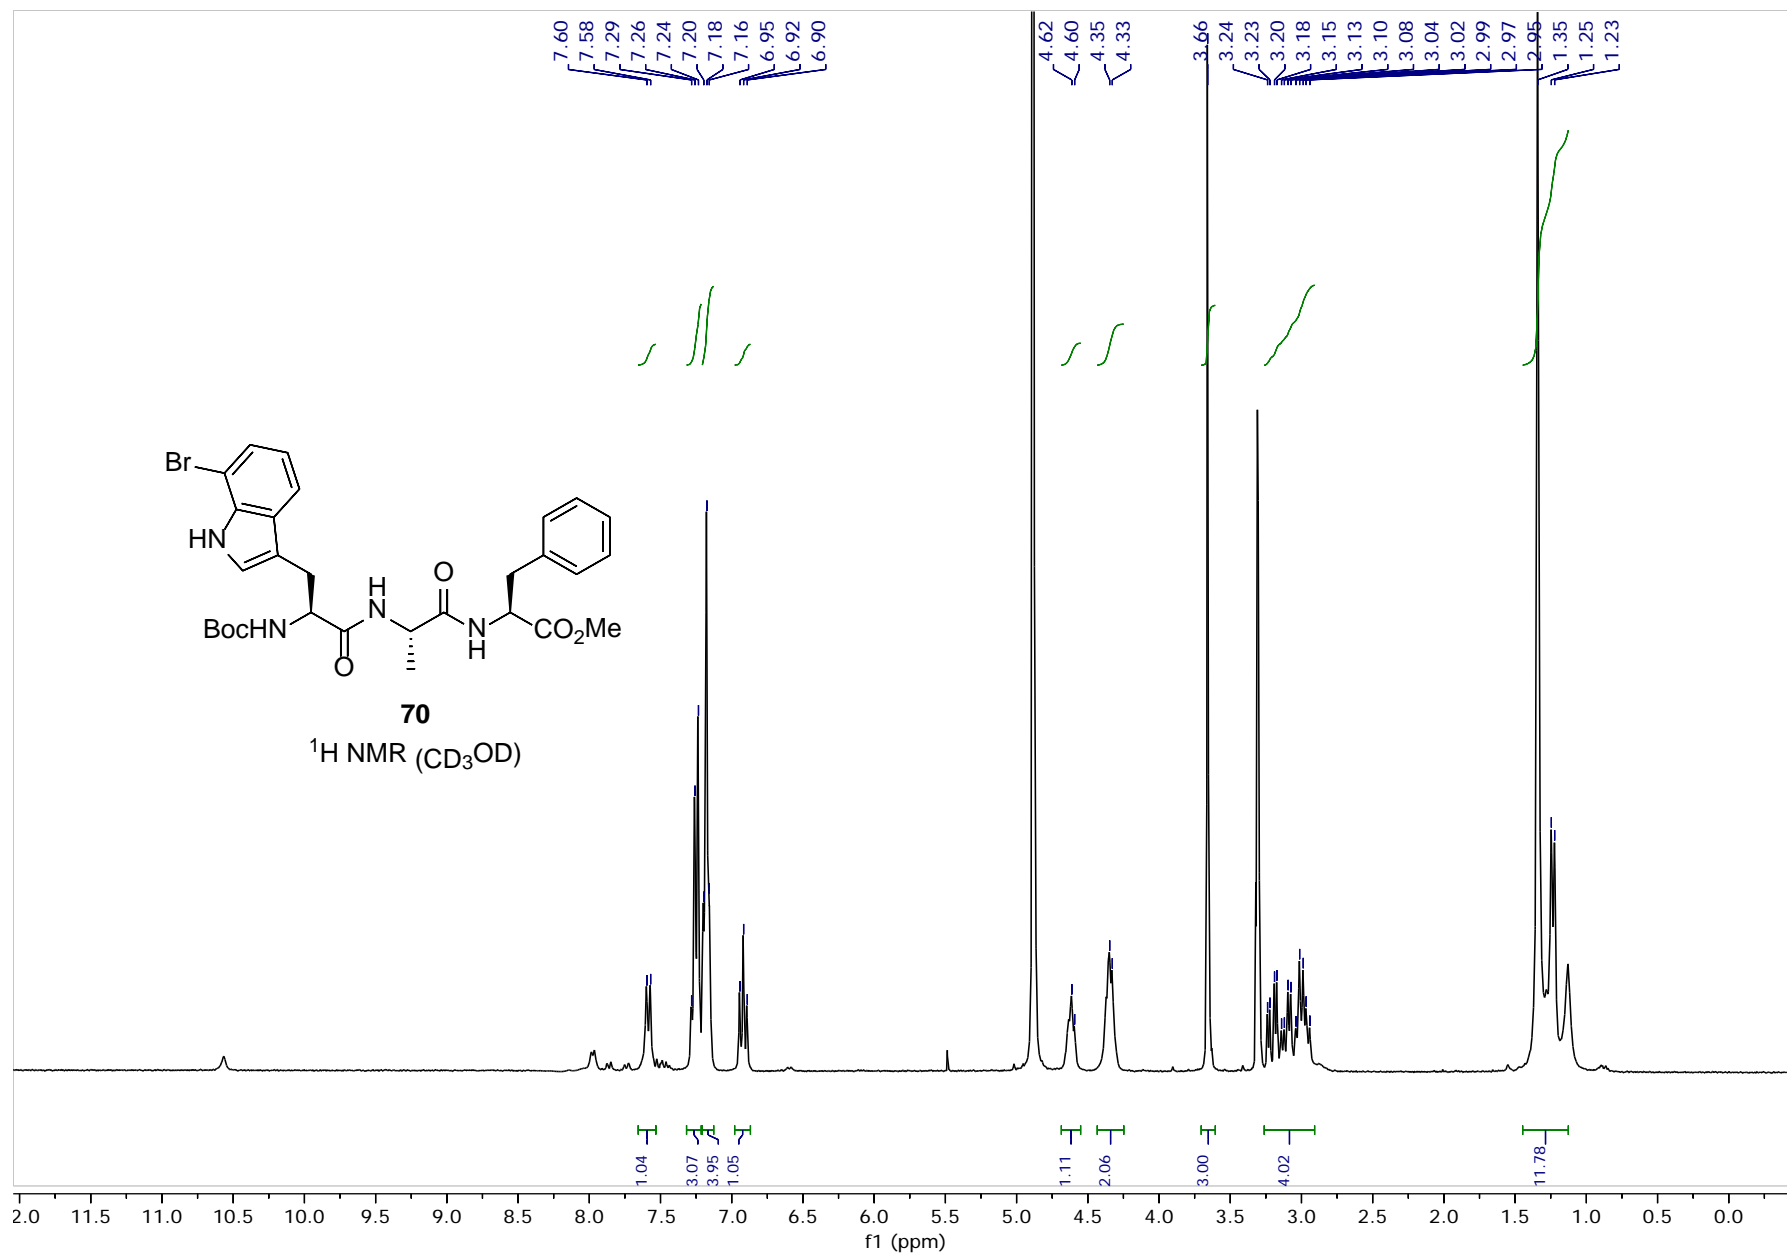

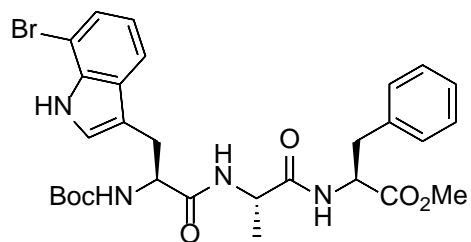

**70**

$^{13}\text{C}$  NMR ( $\text{CD}_3\text{OD}$ )

171.92  
171.76  
171.62

155.59

135.98  
134.91  
129.32  
128.80  
128.67  
127.20  
124.55  
124.07  
120.78  
118.21  
111.75  
104.86

80.24

55.02  
53.58  
52.45  
48.98

37.87

28.49  
28.35

18.40

30 220 210 200 190 180 170 160 150 140 130 120 110 100 90 80 70 60 50 40 30 20 10 0

f1 (ppm)

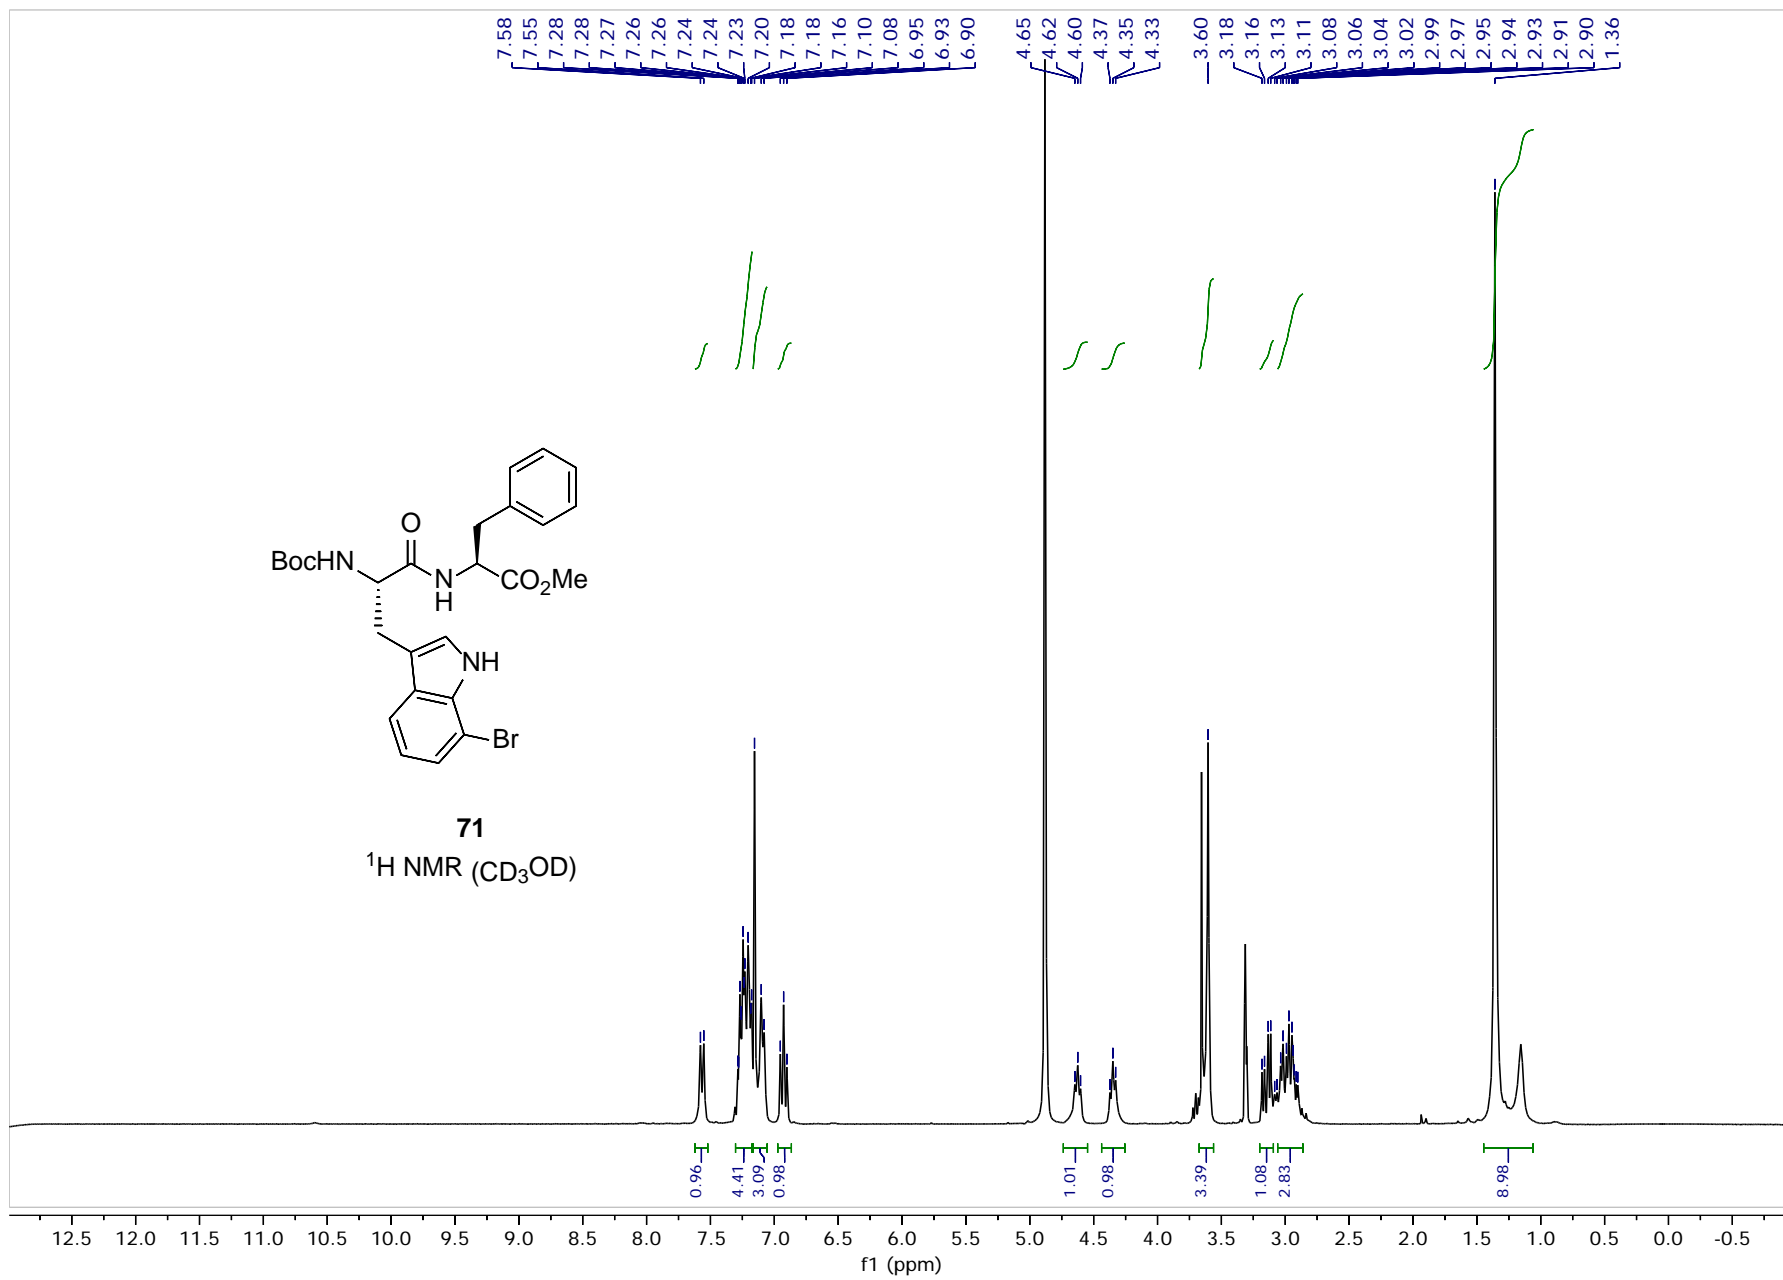

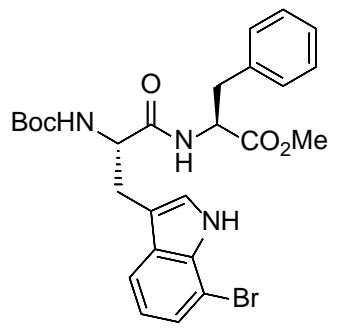

71  
<sup>13</sup>C NMR (CD<sub>3</sub>OD)

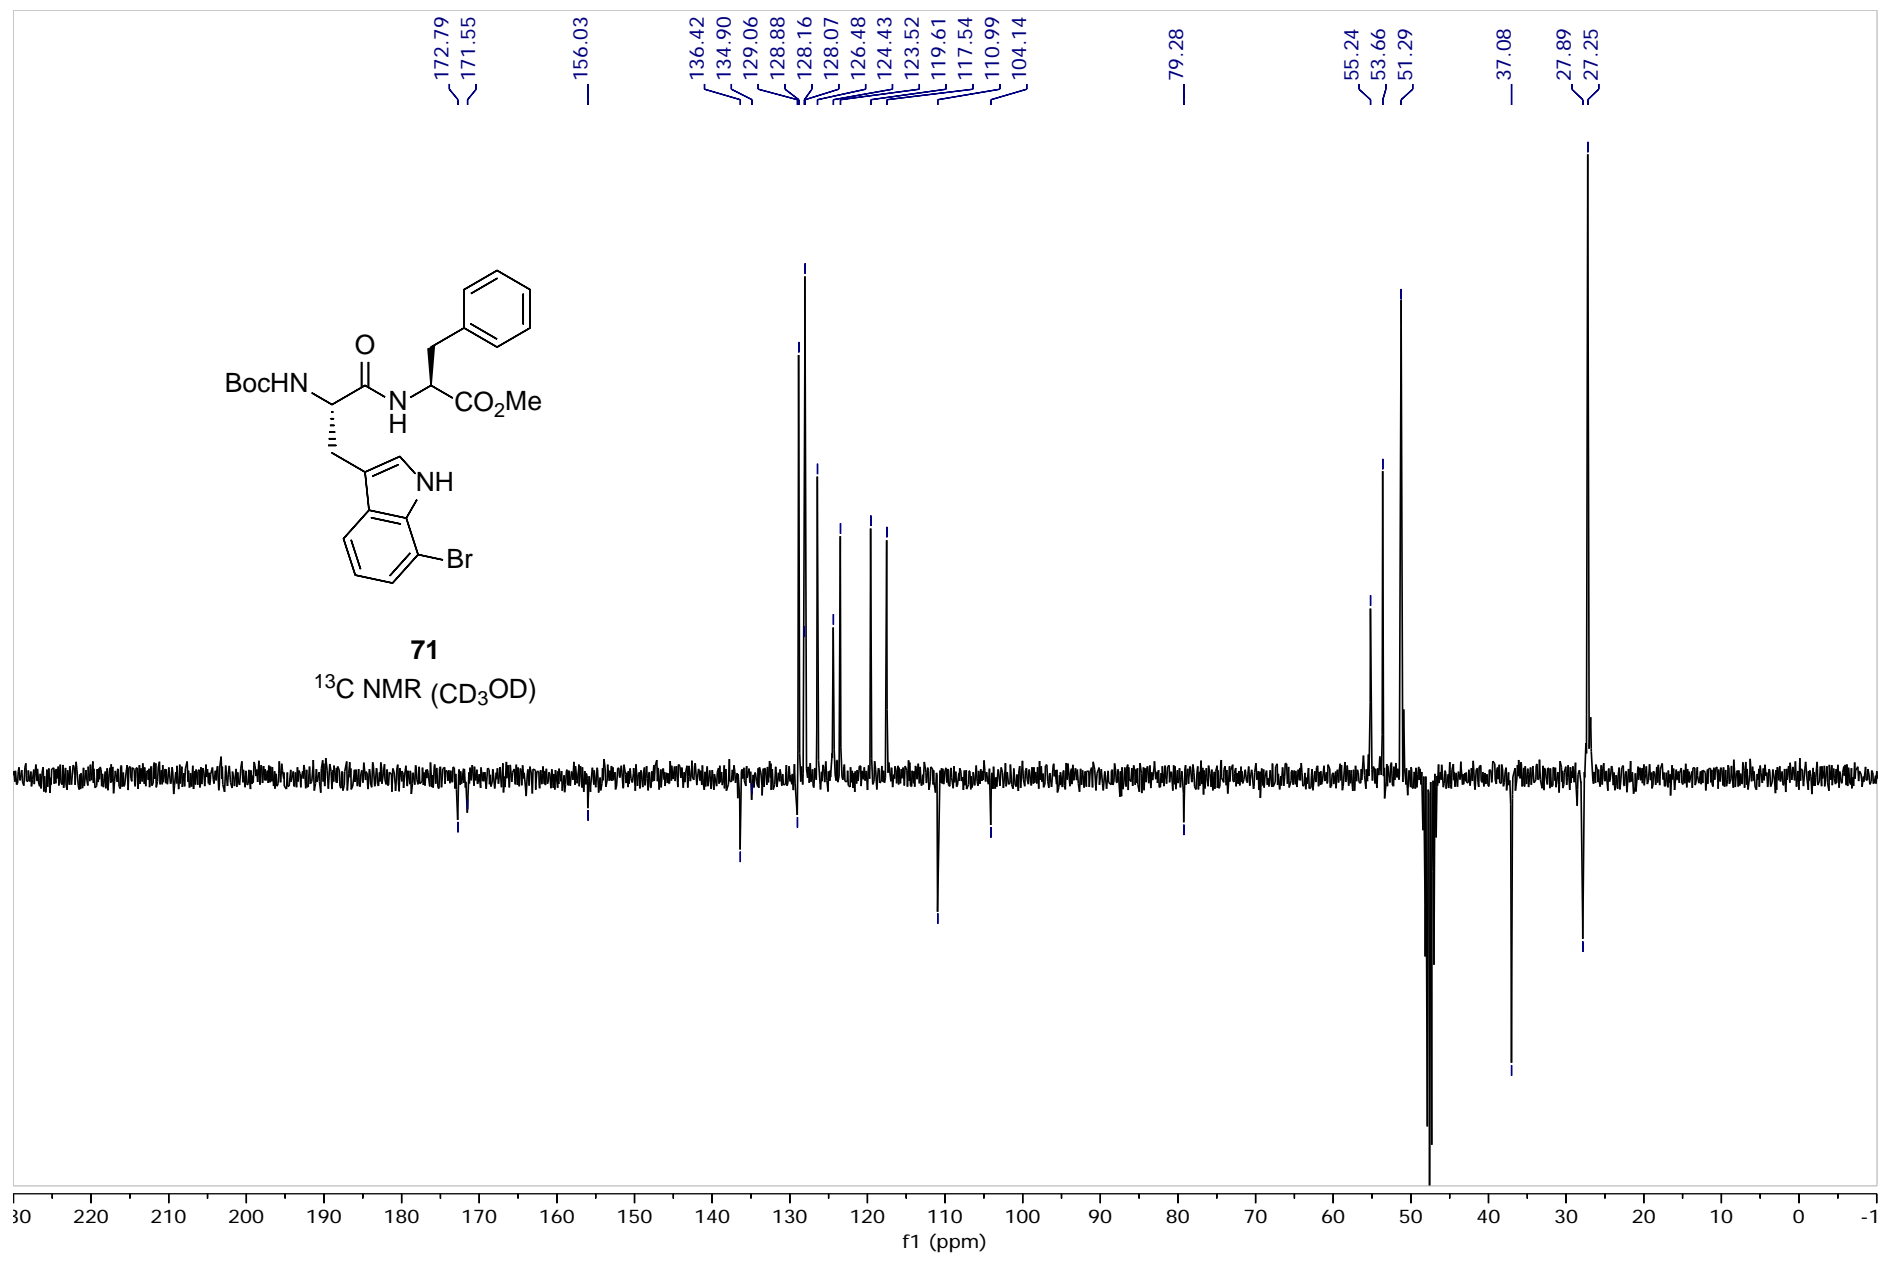

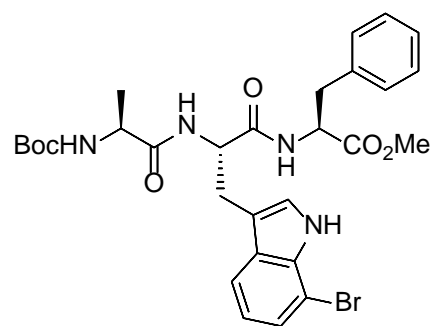

**72**  
<sup>1</sup>H NMR (d<sub>6</sub>-DMSO)

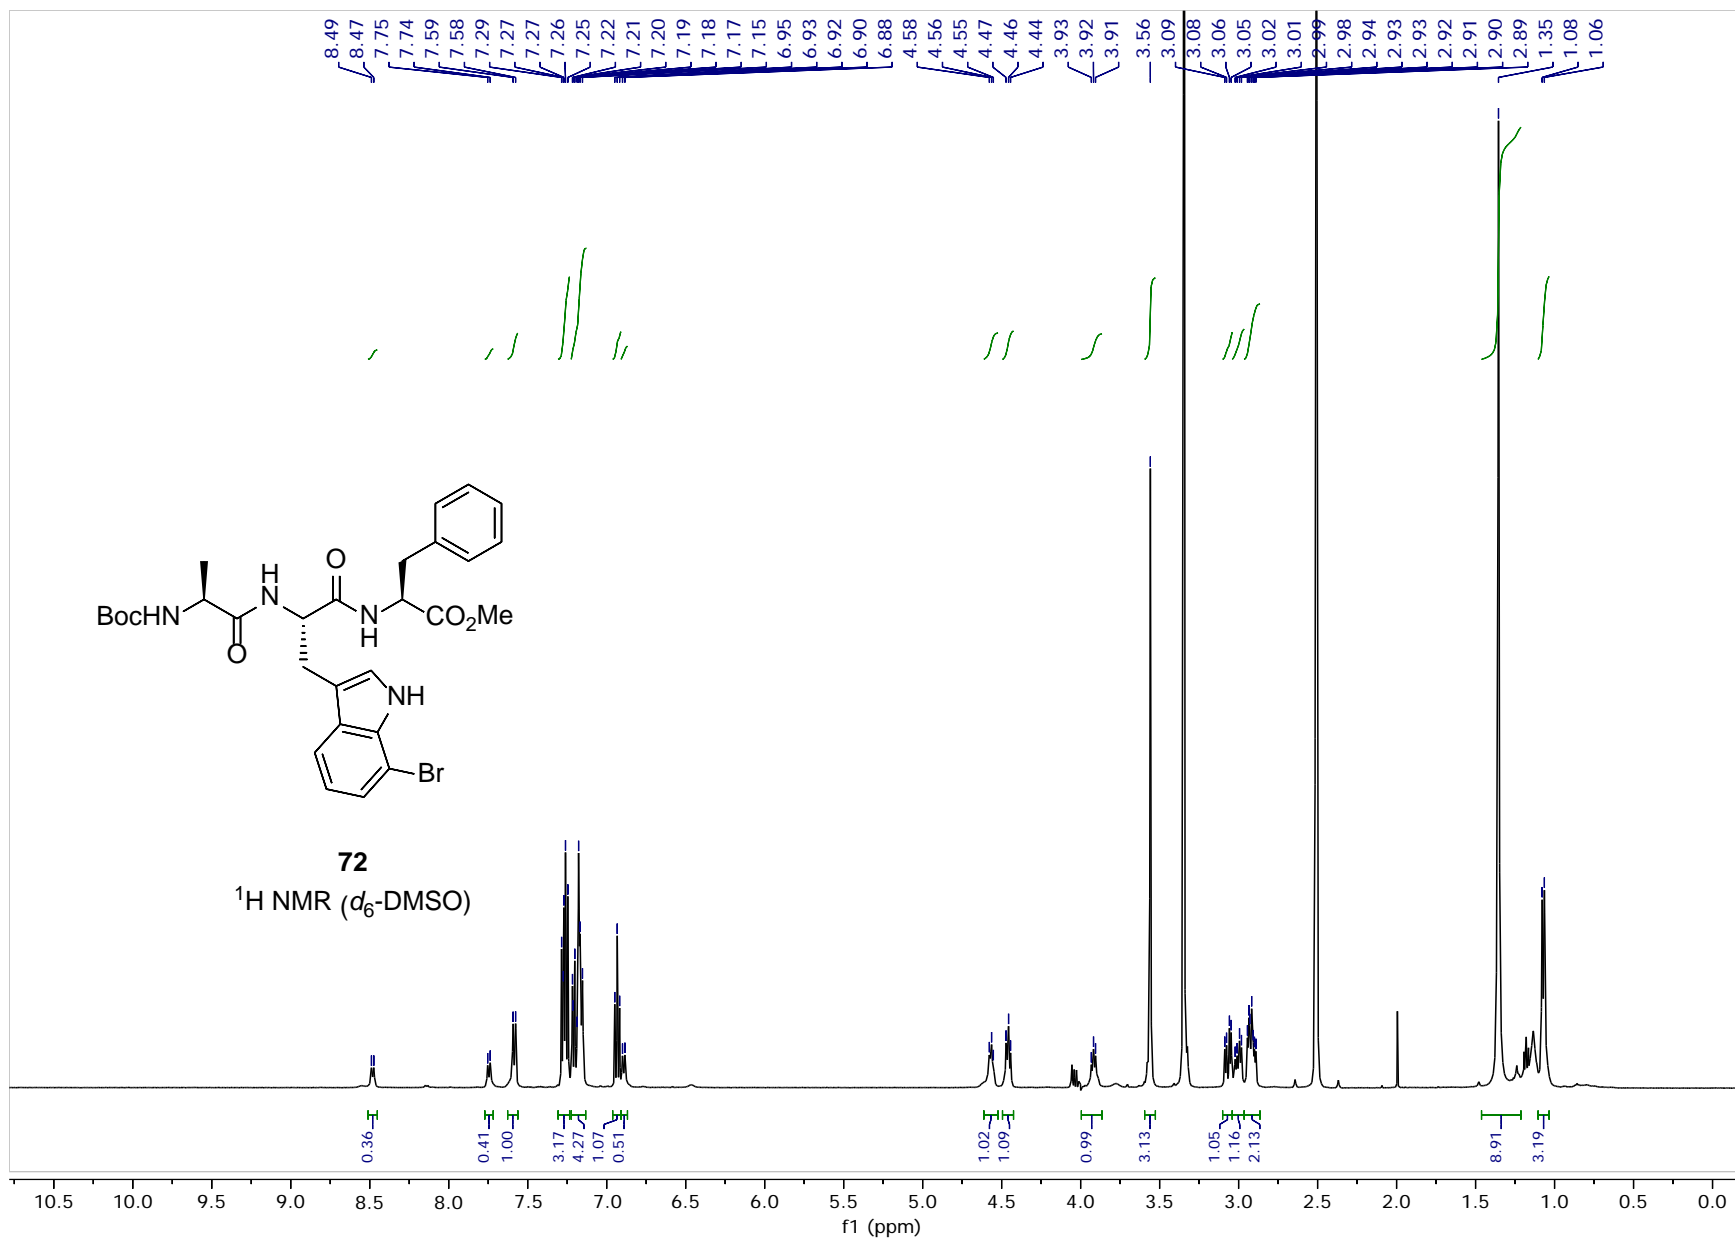



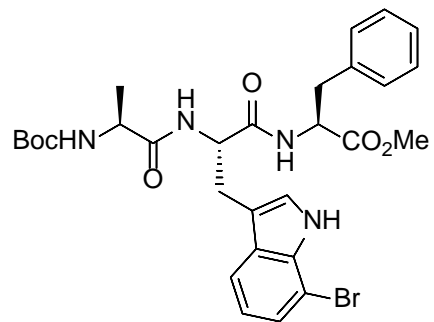

72

$^{13}\text{C}$  NMR ( $d_6$ -DMSO)

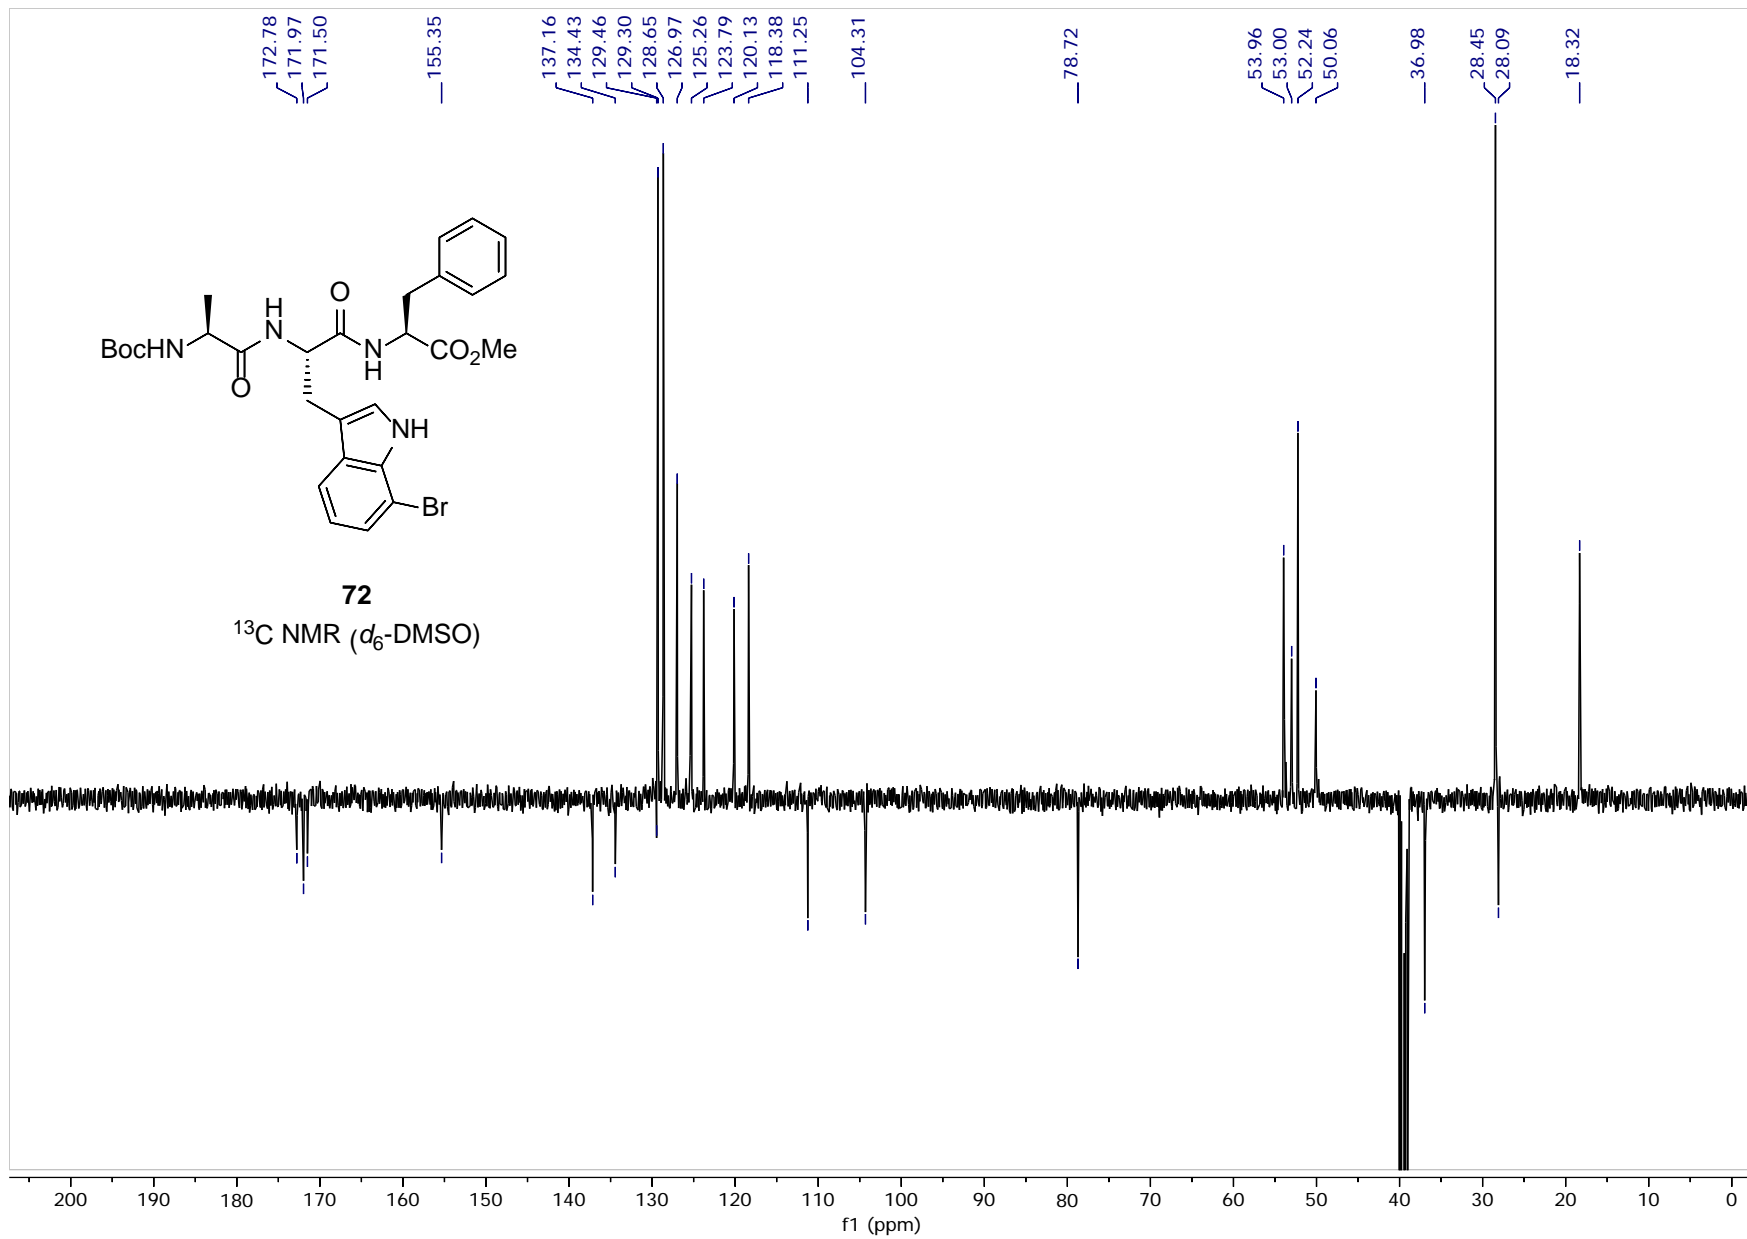

# Enantiopurity analyses by UPLC using Marfey's Reagent

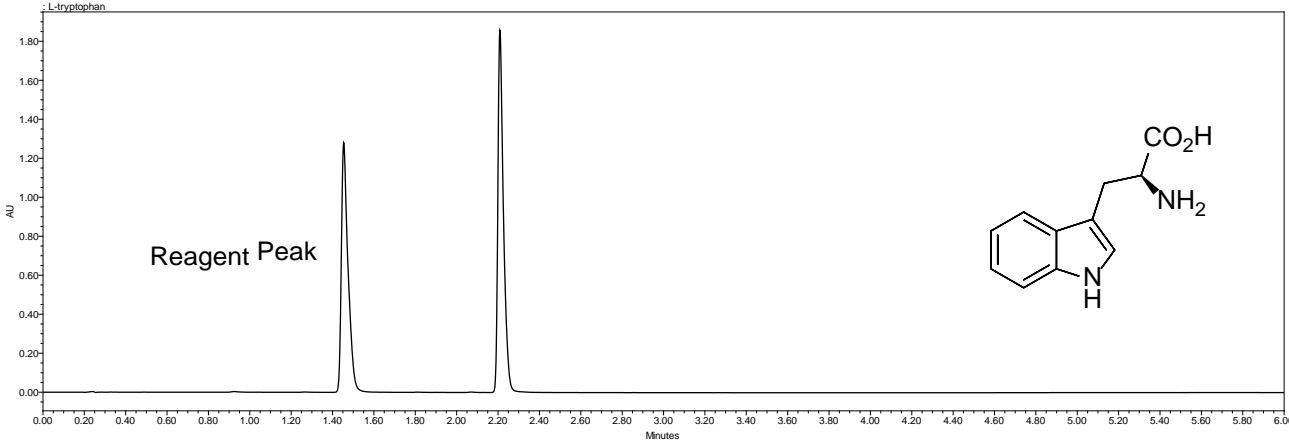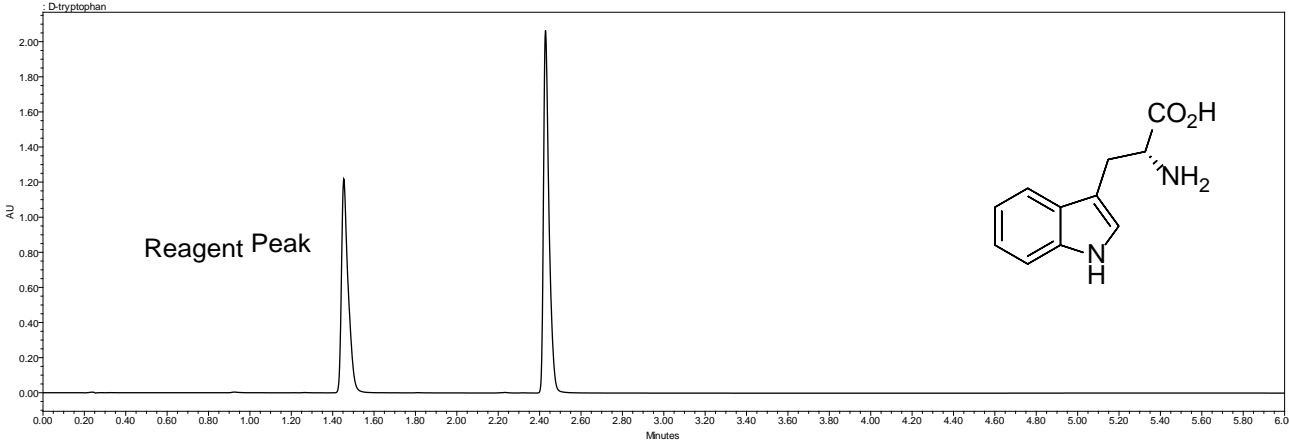

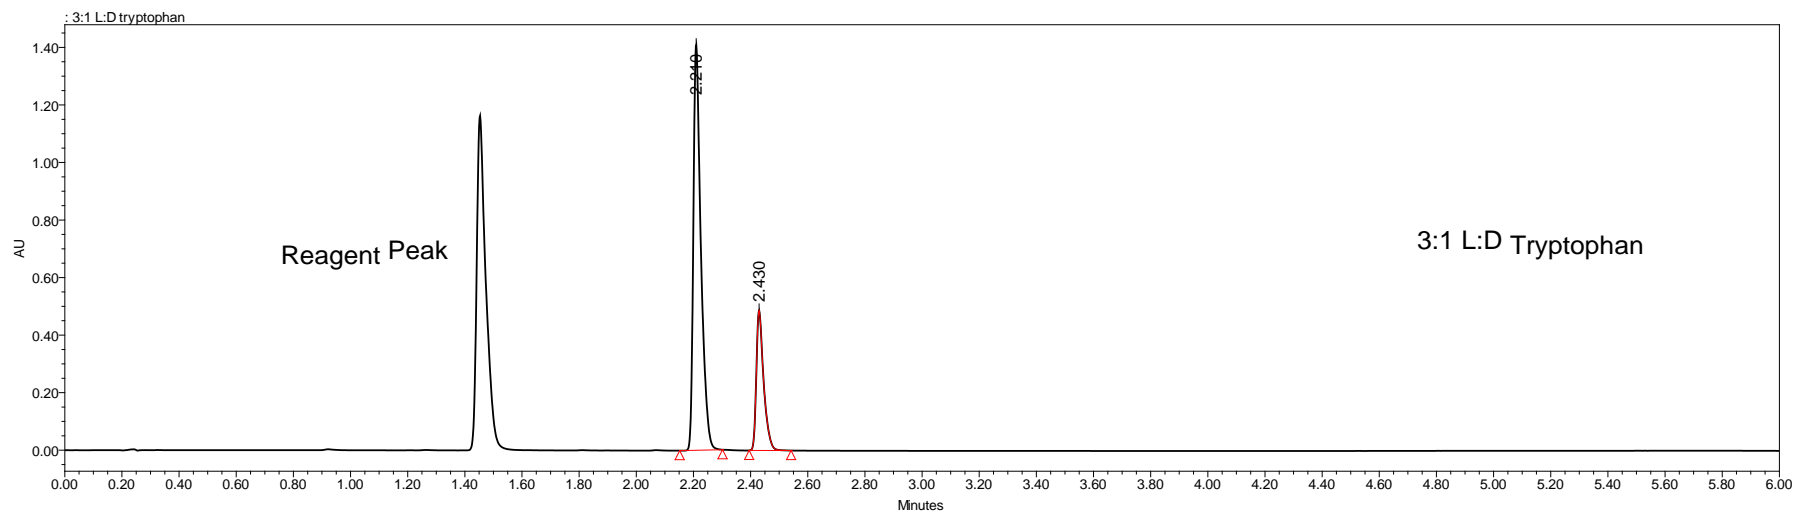

|   | Name | Retention Time | Area    | % Area | Height  | Int Type | Amount | Units | Peak Type | Peak Codes | Match_Criteria | Purity |
|---|------|----------------|---------|--------|---------|----------|--------|-------|-----------|------------|----------------|--------|
| 1 |      | 2.210          | 2588715 | 74.91  | 1409209 | bb       |        |       | Unknown   |            |                |        |
| 2 |      | 2.430          | 867178  | 25.09  | 486339  | bb       |        |       | Unknown   |            |                |        |

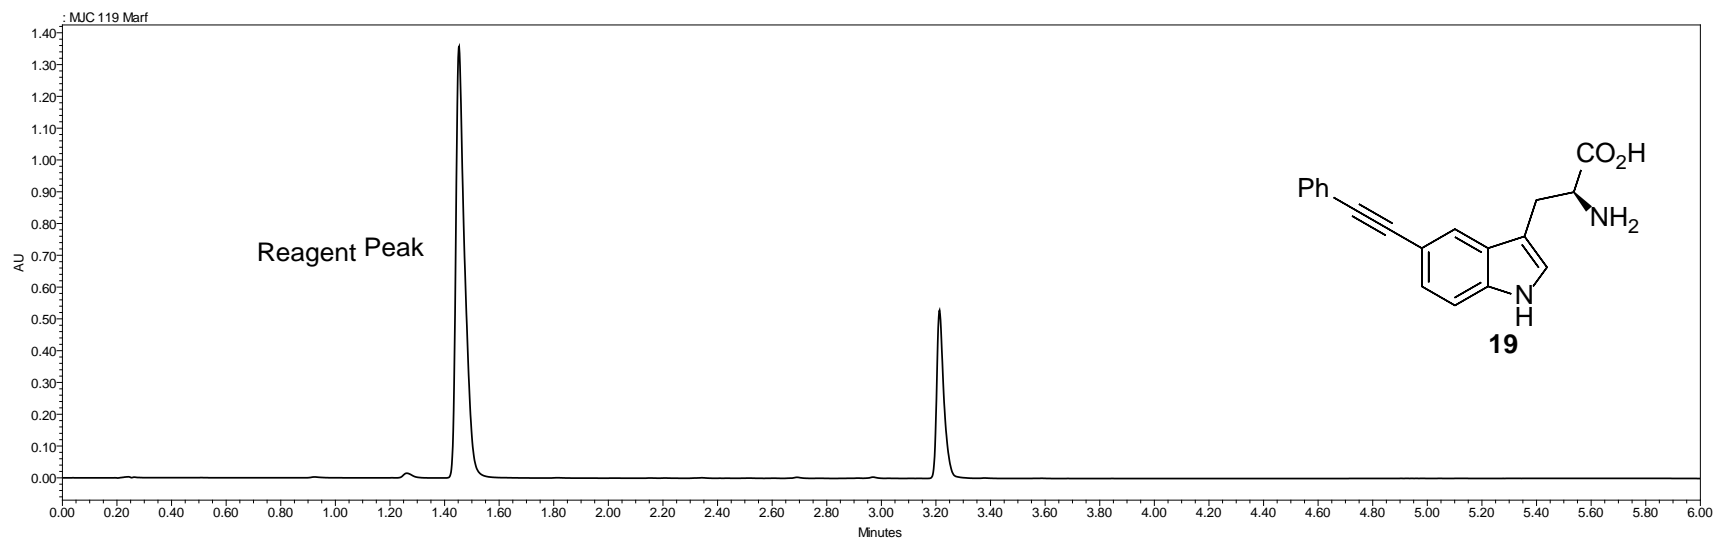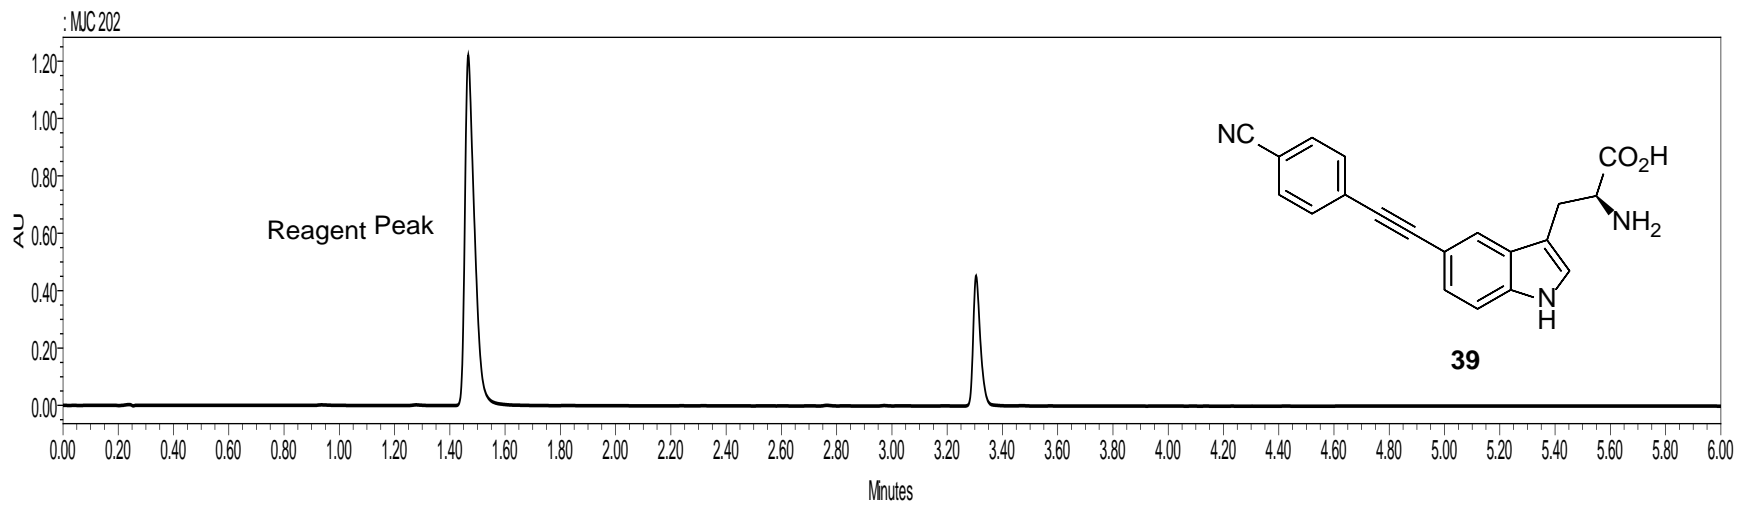

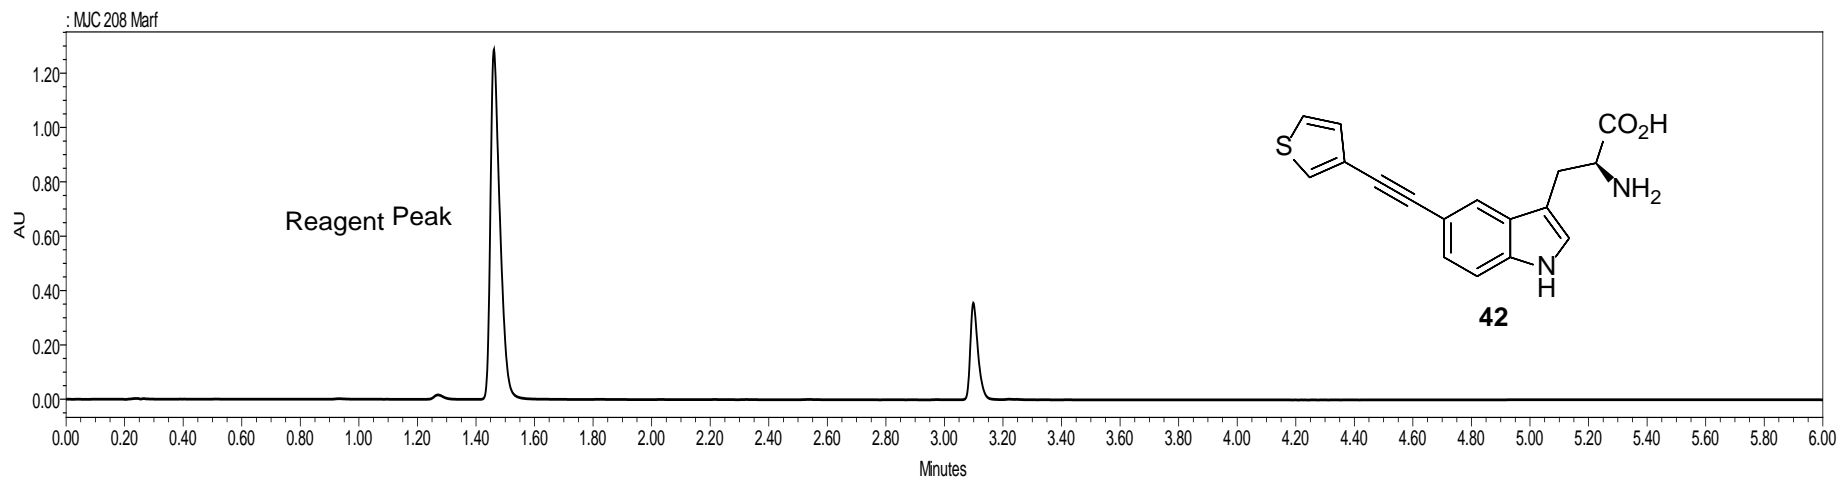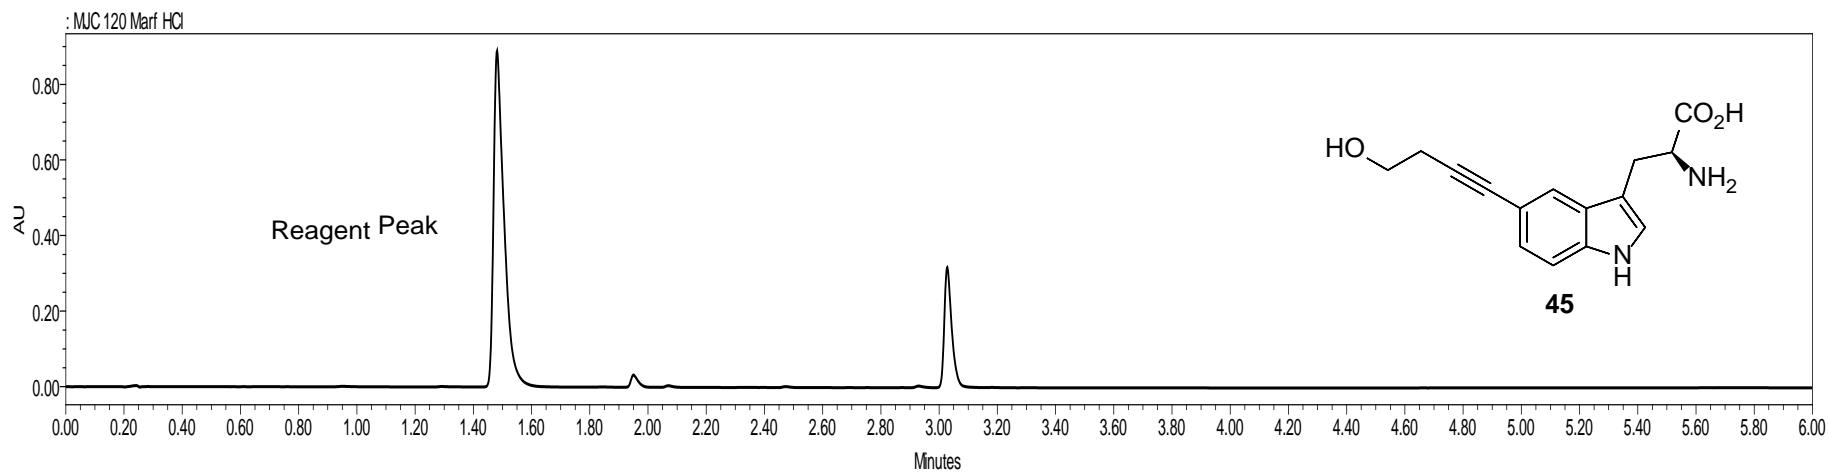

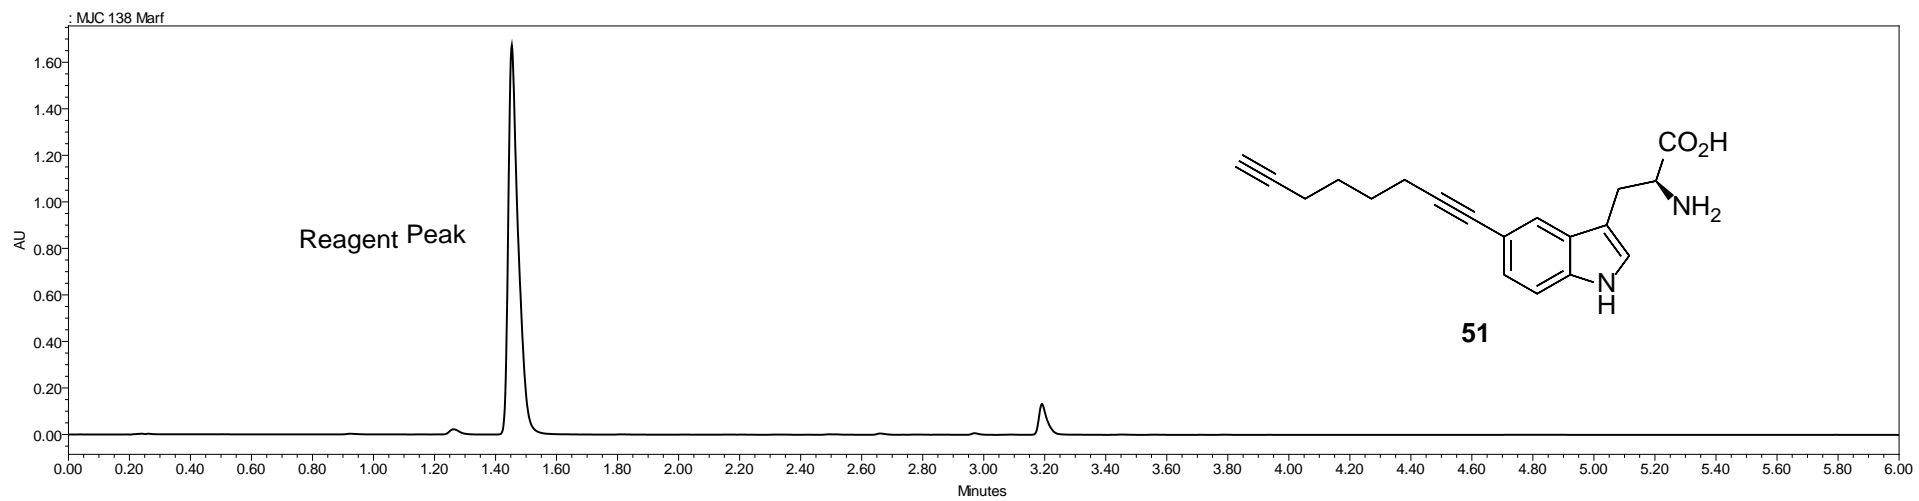

Supplement: SC-008-C6SC04423A-s001.pdf [file SC-008-C6SC04423A-s001.pdf]
